# Supplementary material for: Profiling and functional analysis of exosomal circRNAs from EBV-associated gastric carcinoma CSCs
Source: Research Square preprint supplement (doi:10.21203/rs.3.rs-6704451/v1), 2025-06-12
Supplement: Supplementary file 1 [file 5618bc7cfe18d0a7484006a9.xlsx]

## Sheet: circRNA Expression Profiling
circRNAs identified by DCC Column A: CircRNAID, the ID of the identified circRNA by DCC. Column B ~ G: junction reads, the junction read number of each sample. Column H ~ K: the coordinates of circRNA. Column L: circBaseID, the identifier of circBase (http://www.circbase.org). Column M: source, the source of the circRNA, including circBase, Guojunjie2114,... Column N: best_transcript, the best tr…
	SNU719			SNU4th			Annotations
CircRNAID	Exo1	Exo2	Exo3	Exo1	Exo2	Exo3	chrom	txStart	txEnd	strand	circBaseID	source	best_transcript	GeneName	Catalog	predicted_sequence_length	circRNA-associated diseases
chr1:111118969-111121811+	1	2	1	1	1	1	chr1	111118968	111121811	+		novel	ENST11111369851	GNAI3	intronic	1842
chr1:11131957-11137115-	2	3	4	1	1	1	chr1	11131956	11137115	-	hsa_circ_1119759	circBase	NM_112685	EXOSC11	exonic	362
chr1:11133991-11134383-	2	1	1	4	5	3	chr1	11133991	11134383	-	hsa_circ_1113467	circBase	NM_111111998	EXOSC11	exonic	171
chr1:11133991-11137115-	2	4	11	1	1	1	chr1	11133991	11137115	-	hsa_circ_1112448	circBase	NM_111111998	EXOSC11	exonic	278
chr1:111368419-111368571+	1	2	1	1	1	1	chr1	111368418	111368571	+		novel	ENST11111357651	SLC31A7	intronic	152
chr1:111372418-111387397+	2	1	3	1	1	4	chr1	111372417	111387397	+	hsa_circ_1111198	circBase	NM_133496	SLC31A7	exonic	661	breast cancer, colorectal cancer, endometrial cancer, epithelial ovarian cancer (EOC), kidney cancer, lung cancer, malignant melanoma, non-alcoholic fatty liver disease (NAFLD), ovarian cancer (OC), prostate cancer, testicular germ cell tumor
chr1:111434114-111435155+	1	1	1	1	2	2	chr1	111434113	111435155	+	hsa_circ_1111115	circBase	NM_111561	CD53	exonic	269
chr1:111538216-111546169+	1	1	2	1	1	1	chr1	111538215	111546169	+		novel	uc111dua.3	BX538249	exonic	983
chr1:11155519-11165812+	1	1	1	1	2	1	chr1	11155518	11165812	+	hsa_circ_1115199	circBase	NM_116148	UBE4B	exonic	598
chr1:111564557-111564762+	1	1	1	1	3	1	chr1	111564556	111564762	+		novel	NM_116621	AHCYL1	sense overlapping	216
chr1:111568511-111576139-	1	1	1	3	1	1	chr1	111568511	111576139	-	hsa_circ_1113317	circBase	NM_194292	SASS6	exonic	1115
chr1:111676251-111676681-	1	1	1	2	1	1	chr1	111676249	111676681	-		novel	NM_111918	DBT	sense overlapping	431
chr1:111681373-111696471-	1	2	1	1	1	1	chr1	111681372	111696471	-		novel	NM_111918	DBT	exonic	688
chr1:111691264-111691675+	1	1	2	1	1	1	chr1	111691263	111691675	+	hsa_circ_1113496	circBase	NM_116191	CEPT1	exonic	412
chr1:111691264-111713918+	1	1	8	1	3	8	chr1	111691263	111713918	+	hsa_circ_1111116	circBase	NM_116191	CEPT1	exonic	712
chr1:111691264-111717585+	1	2	1	2	1	6	chr1	111691263	111717585	+	hsa_circ_1113497	circBase	NM_116191	CEPT1	exonic	787
chr1:111733629-111734939-	1	1	2	1	1	1	chr1	111733628	111734939	-		novel	NM_124911	DENND2D	sense overlapping	1311
chr1:111765586-111768811+	1	1	1	1	1	2	chr1	111765585	111768811	+	hsa_circ_1111416	circBase	NM_114978	KCNC4	exonic	1141
chr1:11176911-11178931+	1	1	1	2	1	1	chr1	11176911	11178931	+	hsa_circ_1118661	circBase	NM_117375	TARDBP	exonic	315
chr1:11184555-11193254-	1	5	2	1	1	1	chr1	11184554	11193254	-	hsa_circ_1116576	circBase	NM_114958	MTOR	exonic	1416
chr1:111856288-111921148+	1	1	1	1	2	1	chr1	111856287	111921148	+		novel	NM_113672	CDC14A	exonic	391
chr1:11186852-11189516+	1	1	1	1	1	2	chr1	11186851	11189516	+	hsa_circ_1119694	circBase	NM_116148	UBE4B	exonic	141
chr1:11186852-11195244+	1	1	2	1	1	1	chr1	11186851	11195244	+		novel	NM_116148	UBE4B	exonic	671
chr1:111889778-111918552+	3	1	1	1	1	1	chr1	111889777	111918552	+	hsa_circ_1111197	circBase	NM_113672	CDC14A	exonic	211	T-cell leukemia, acute lymphoblastic leukemia (ALL), acute myeloid leukemia (AML), breast cancer, colorectal cancer, epithelial ovarian cancer (EOC), esophageal cancer, glioma, head and neck squamous cell carcinoma (HNSCC), lung cancer, malignant melanoma, multiple myeloma (MM), non-small cell lung cancer (NSCLC), ovarian cancer (OC), pancreatic ductal adenocarcinoma (PDAC), testicular germ cell …
chr1:11191558-11191871+	1	1	2	1	1	1	chr1	11191557	11191871	+	hsa_circ_1119696	circBase	NM_116148	UBE4B	exonic	216
chr1:11192427-11197263+	1	1	1	1	2	1	chr1	11192426	11197263	+	hsa_circ_1111195	circBase	NM_116148	UBE4B	exonic	452
chr1:11195146-11197263+	1	1	4	1	1	1	chr1	11195145	11197263	+	hsa_circ_1116955	circBase	NM_116148	UBE4B	exonic	338
chr1:112411587-112415667-	1	1	1	1	6	1	chr1	112411586	112415667	-		novel	ENST11111312127	KCND3	intronic	14181
chr1:11259315-11259761-	3	2	3	11	2	6	chr1	11259314	11259761	-	hsa_circ_1111437	circBase	NM_114958	MTOR	exonic	319
chr1:11272369-11276291-	1	1	1	3	4	2	chr1	11272368	11276291	-	hsa_circ_1111442	circBase	NM_114958	MTOR	exonic	531
chr1:113119618-113126748-	1	1	1	1	1	3	chr1	113119617	113126748	-	hsa_circ_1111463	circBase	NM_117744	ST7L	exonic	544
chr1:11316315-11328321+	1	1	1	1	1	2	chr1	11316314	11328321	+	hsa_circ_1111215	circBase	NM_115174	KIF1B	exonic	614
chr1:113196221-113212411+	3	5	9	1	6	8	chr1	113196219	113212411	+	hsa_circ_1111119	circBase	NM_116135	CAPZA1	exonic	431	Alzheimer's disease, B-cell chronic lymphocytic leukemia, Duchenne muscular dystrophy (DMD), acute lymphoblastic leukemia (ALL), acute myeloid leukemia (AML), bladder cancer, cardiac hypertrophy, cervical cancer, chronic lymphocytic leukemia (CLL), epithelial ovarian cancer (EOC), glioblastoma, glioblastoma multiforme (GBM), head and neck squamous cell carcinoma (HNSCC), hepatocellular carcinoma …
chr1:113198491-113159517-	2	1	1	1	1	1	chr1	113198489	113159517	-	hsa_circ_1111117	circBase	NM_117744	ST7L	exonic	1191	Alzheimer's disease, Burkitt lymphoma, Down syndrome (DS), Hodgkin's lymphoma, acute lymphoblastic leukemia (ALL), acute myeloid leukemia (AML), acute promyelocytic leukemia (APL), adenoma, breast cancer, cardiac hypertrophy, cervical cancer, cholangiocarcinoma, chronic lymphocytic leukemia (CLL), colorectal cancer, diffuse large B-cell lymphoma (DLBCL), epithelial ovarian cancer (EOC), esophagea…
chr1:11321963-11332364+	1	1	1	1	2	1	chr1	11321962	11332364	+	hsa_circ_1111225	circBase	NM_115174	KIF1B	exonic	511
chr1:114118157-114118162+	3	3	1	3	2	3	chr1	114118156	114118162	+	hsa_circ_1111199	circBase	NM_121978	AMY2B	exonic	1317
chr1:114128119-114137182+	1	1	1	1	3	1	chr1	114128118	114137182	+	hsa_circ_1111513	circBase	NM_152911	MAGI3	exonic	465
chr1:114248512-114281421-	1	1	1	2	1	1	chr1	114248511	114281421	-		novel	NM_116618	PHTF1	exonic	1569
chr1:114367764-114377158-	1	1	1	1	2	1	chr1	114367763	114377158	-		novel	ENST11111461621	PTPN22	intronic	9295
chr1:114372214-114377122-	1	2	1	1	1	1	chr1	114372213	114377122	-		novel	ENST11111461621	PTPN22	intronic	4819
chr1:114372214-114377161-	6	11	1	1	41	3	chr1	114372213	114377161	-	hsa_circ_1111111	circBase	NM_112411	PTPN22	exonic	356
chr1:114372214-114397671-	1	2	1	1	1	1	chr1	114372213	114397671	-	hsa_circ_1113618	circBase	NM_112411	PTPN22	exonic	1545
chr1:114377532-114397671-	3	1	1	2	12	6	chr1	114377531	114397671	-	hsa_circ_1111529	circBase	NM_112411	PTPN22	exonic	1189
chr1:114381212-114381242-	1	1	2	1	1	1	chr1	114381211	114381242	-		novel	NM_112411	PTPN22	exonic	895
chr1:114381212-114397671-	1	1	1	2	1	1	chr1	114381211	114397671	-		novel	NM_112411	PTPN22	exonic	1115
chr1:114391162-114397671-	16	2	1	1	5	5	chr1	114391161	114397671	-	hsa_circ_1111111	circBase	NM_115967	PTPN22	exonic	375
chr1:114391162-114412182-	1	1	2	1	1	1	chr1	114391161	114412182	-		novel	NM_115967	PTPN22	exonic	828
chr1:114397193-114397671-	1	1	1	1	1	5	chr1	114397192	114397671	-	hsa_circ_1113619	circBase	NM_112411	PTPN22	exonic	211
chr1:115115726-115117111-	1	2	2	2	1	2	chr1	115115725	115117111	-	hsa_circ_1114127	circBase	NM_115916	TRIM33	exonic	397
chr1:115276353-115281693-	1	1	1	1	1	2	chr1	115276352	115281693	-	hsa_circ_1111115	circBase	NM_117158	CSDE1	exonic	545	Duchenne muscular dystrophy (DMD), acute myeloid leukemia (AML), breast cancer, cardiac hypertrophy, cholangiocarcinoma, chronic lymphocytic leukemia (CLL), colorectal cancer, epithelial ovarian cancer (EOC), facioscapulohumeral muscular dystrophy (FSHD), glioblastoma multiforme (GBM), head and neck squamous cell carcinoma (HNSCC), kidney cancer, limb-girdle muscular dystrophies types 2A (LGMD2A)…
chr1:115292442-115292828-	1	1	1	2	1	1	chr1	115292441	115292828	-		novel	NM_117158	CSDE1	exonic	387
chr1:1158624-1159348-	3	2	1	2	1	2	chr1	1158623	1159348	-	hsa_circ_1111112	circBase	NM_116176	SDF4	exonic	251	acute myeloid leukemia (AML), breast cancer, colorectal cancer, epithelial ovarian cancer (EOC), esophageal cancer, head and neck squamous cell carcinoma (HNSCC), malignant melanoma, non-small cell lung cancer (NSCLC), ovarian cancer (OC), testicular germ cell tumor
chr1:117178587-117178851-	1	1	1	1	1	6	chr1	117178586	117178851	-		novel	NM_111779	CD58	exonic	264
chr1:117186933-117187226-	1	1	1	1	1	2	chr1	117186932	117187226	-		novel	NM_111779	CD58	exonic	294
chr1:117939574-117984947+	1	1	1	1	3	1	chr1	117939573	117984947	+		novel	NM_116699	MAN1A2	sense overlapping	45374
chr1:117944818-117948267+	2	1	1	3	1	1	chr1	117944817	117948267	+	hsa_circ_1111116	circBase	NM_116699	MAN1A2	exonic	353	prostate cancer
chr1:117944818-117957453+	3	3	2	9	5	3	chr1	117944817	117957453	+	hsa_circ_1111117	circBase	NM_116699	MAN1A2	exonic	472	prostate cancer
chr1:117944818-117963271+	24	7	7	21	22	4	chr1	117944817	117963271	+	hsa_circ_1111118	circBase	NM_116699	MAN1A2	exonic	553	prostate cancer
chr1:117944818-117984947+	2	5	3	7	2	1	chr1	117944817	117984947	+	hsa_circ_1111119	circBase	NM_116699	MAN1A2	exonic	648	prostate cancer
chr1:117944818-118119149+	1	3	1	1	1	1	chr1	117944817	118119149	+	hsa_circ_1111121	circBase	NM_116699	MAN1A2	exonic	866	Alzheimer's disease, bladder cancer, cardiac hypertrophy, epithelial ovarian cancer (EOC), hepatocellular carcinoma (HCC), pituitary adenoma, prostate cancer, schizophrenia
chr1:118113111-118145592+	1	1	2	2	1	1	chr1	118113111	118145592	+	hsa_circ_1112159	circBase	NM_116699	MAN1A2	exonic	843
chr1:118226111-118247683-	1	1	2	1	1	1	chr1	118226119	118247683	-	hsa_circ_1111312	circBase	NM_116113	VAV3	exonic	275
chr1:118454616-118461358-	2	1	1	4	5	3	chr1	118461218	118463147	-	hsa_circ_1113755	circBase	NM_117686	GDAP2	exonic	383
chr1:118511533-118513998+	2	4	11	1	1	1	chr1	118511532	118513998	+	hsa_circ_1111616	circBase	NM_116784	WDR3	sense overlapping	2466
chr1:118691911-118713915-	1	2	1	1	3	1	chr1	118691911	118713915	-	hsa_circ_1114271	circBase	NM_113386	SLC25A24	exonic	532
chr1:1191425-1198766-	1	1	1	2	1	1	chr1	1191424	1198766	-		novel	NM_158167	UBE2J2	exonic	364
chr1:119192833-119211211-	1	1	1	1	4	1	chr1	119192832	119211211	-	hsa_circ_1111313	circBase	NM_144584	HENMT1	exonic	735
chr1:1192372-1192691-	1	1	1	2	1	1	chr1	1192371	1192691	-	hsa_circ_1118163	circBase	NM_158167	UBE2J2	exonic	242
chr1:119336214-119342927+	1	1	1	1	5	1	chr1	119336213	119342927	+	hsa_circ_1111319	circBase	NM_117269	STXBP3	exonic	572
chr1:119952551-119953735-	2	1	1	1	2	1	chr1	119952549	119953735	-	hsa_circ_1113452	circBase	NM_112791	PSMA5	exonic	191
chr1:121115832-121116815+	1	1	1	3	4	2	chr1	121115831	121116815	+	hsa_circ_1115112	circBase	NR_121535	SRGAP2D	exonic	345
chr1:121361285-121366956+	1	1	1	1	2	1	chr1	121361284	121366956	+		novel			intergenic	6672
chr1:121361489-121365294+	1	1	2	1	1	1	chr1	121361488	121365294	+		novel			intergenic	4816
chr1:121458897-121459156-	1	5	2	1	1	1	chr1	121458896	121459156	-		novel	NM_124418	NOTCH2	sense overlapping	161
chr1:121484152-121485171+	1	1	1	1	4	1	chr1	121484151	121485171	+		novel	TCONS_11111651	XLOC_111992	antisense	1119
chr1:12156213-12157478+	1	2	1	9	6	9	chr1	12156212	12157478	+	hsa_circ_1111631	circBase	NM_114874	MFN2	exonic	288
chr1:121594198-121594393-	3	2	3	11	2	6	chr1	121594197	121594393	-	hsa_circ_1116119	circBase	ENST11111612566	NOTCH2	exonic	296
chr1:12328763-12331181+	15	2	5	5	5	3	chr1	12328762	12331181	+		novel	NM_115378	VPS13D	exonic	312
chr1:12335882-12338195+	4	1	1	16	2	4	chr1	12335881	12338195	+	hsa_circ_1119964	circBase	NM_115378	VPS13D	exonic	2214
chr1:12461238-12476881+	2	1	2	6	3	4	chr1	12461237	12476881	+	hsa_circ_1114222	circBase	NM_115378	VPS13D	exonic	699
chr1:12638746-12639441-	2	1	1	3	6	2	chr1	12638745	12639441	-	hsa_circ_1111123	circBase	NM_114753	DHRS3	exonic	359
chr1:14114913-14119326+	2	4	10	1	1	1	chr1	14114912	14119326	+	hsa_circ_1111129	circBase	NM_112231	PRDM2	exonic	4414
chr1:14142136-14148842+	3	11	1	13	4	4	chr1	14142135	14148842	+		novel	NM_112231	PRDM2	sense overlapping	6817
chr1:14142136-14168652+	5	8	8	3	2	2	chr1	14142135	14168652	+	hsa_circ_1111128	circBase	NM_112231	PRDM2	exonic	449
chr1:14142136-14199683+	2	2	1	3	6	3	chr1	14142135	14199683	+	hsa_circ_1111661	circBase	NM_112231	PRDM2	exonic	687
chr1:14157495-14168652+	2	5	2	2	2	1	chr1	14157494	14168652	+	hsa_circ_1115986	circBase	NM_112231	PRDM2	exonic	375
chr1:14157495-14175982+	2	1	1	5	3	3	chr1	14157494	14175982	+	hsa_circ_1114861	circBase	NM_112231	PRDM2	exonic	512
chr1:14195613-14119326+	14	5	4	3	2	3	chr1	14195612	14119326	+		novel	uc111avk.3	PRDM2	exonic	4581
chr1:14199573-14119326+	2	4	11	1	1	1	chr1	14199572	14119326	+	hsa_circ_1111664	circBase	NM_112231	PRDM2	exonic	4525
chr1:145227141-145248894+	1	1	1	1	1	3	chr1	145227141	145248894	+	hsa_circ_1112262	circBase	ENST11111369341	NOTCH2NL	exonic	378
chr1:145248813-145281714+	1	1	2	1	1	1	chr1	145248812	145281714	+	hsa_circ_1112956	circBase	NM_213458	NOTCH2NL	exonic	678
chr1:145293517-145299875+	1	5	2	1	1	1	chr1	145293516	145299875	+		novel	NM_111277444	NBPF9	intronic	6359
chr1:145439891-145441141+	1	1	1	1	2	1	chr1	145439891	145441141	+		novel	NM_111139713	NBPF11	intronic	251
chr1:145592633-145594188-	1	3	1	1	1	1	chr1	145592632	145594188	-	hsa_circ_1111699	circBase	NM_116468	POLR3C	sense overlapping	1556
chr1:145592633-145595221-	1	1	2	2	11	2	chr1	145592632	145595221	-	hsa_circ_1117755	circBase	NM_116468	POLR3C	sense overlapping	2588
chr1:145641883-145651541+	1	3	1	1	1	1	chr1	145641882	145651541	+	hsa_circ_1111713	circBase	NM_111139713	NBPF11	intronic	9658
chr1:145646115-145663367+	1	1	1	1	2	1	chr1	145646114	145663367	+	hsa_circ_1111715	circBase	NM_114455	RNF115	exonic	326
chr1:145646115-145684678+	1	1	1	1	3	1	chr1	145646114	145684678	+	hsa_circ_1111716	circBase	NM_114455	RNF115	exonic	565
chr1:145684585-145687191+	1	1	1	2	1	1	chr1	145684584	145687191	+	hsa_circ_1113922	circBase	NM_114455	RNF115	exonic	211
chr1:145769418-145813388-	1	1	1	4	1	1	chr1	145769417	145813388	-	hsa_circ_1113926	circBase	NR_136541	GPR89A	exonic	559
chr1:145787772-145791171-	1	1	1	1	3	1	chr1	145787771	145791171	-	hsa_circ_1115641	circBase	NR_136541	GPR89A	exonic	292
chr1:145897185-145911491+	1	1	1	1	1	2	chr1	145897184	145911491	+	hsa_circ_1118553	circBase	ENST11111422144	GPR89C	exonic	819
chr1:146724278-146731572+	2	1	1	1	3	1	chr1	146724277	146731572	+	hsa_circ_1114221	circBase	NM_114284	CHD1L	exonic	449
chr1:146737591-146741537+	2	1	1	1	1	1	chr1	146737591	146741537	+	hsa_circ_1111711	circBase	NM_114284	CHD1L	exonic	346
chr1:146757975-146759412+	1	1	1	1	3	1	chr1	146757974	146759412	+	hsa_circ_1116296	circBase	NM_114284	CHD1L	exonic	312
chr1:14711385-14711557+	2	4	11	1	1	1	chr1	14711384	14711557	+		novel			intergenic	173
chr1:149813924-149814191-	1	1	1	2	1	1	chr1	149813923	149814191	-		novel	NM_113516	HIST2H2AA3	sense overlapping	267
chr1:149822756-149823122+	1	1	1	2	1	1	chr1	149822755	149823122	+		novel	NM_113516	HIST2H2AA3	sense overlapping	267
chr1:1499985-1511296-	1	1	1	1	3	1	chr1	1499984	1511296	-		novel	NM_114188	SSU72	sense overlapping	312
chr1:151139411-151139891+	2	1	3	1	3	3	chr1	151139419	151139891	+	hsa_circ_1111128	circBase	NM_124141	SCNM1	exonic	276	Cerebellar neurodegeneration, acute lymphoblastic leukemia (ALL), acute myeloid leukemia (AML), cardiac hypertrophy, epithelial ovarian cancer (EOC), esophageal cancer, non-alcoholic fatty liver disease (NAFLD), pancreatic cancer, pituitary adenoma, prostate cancer
chr1:151161666-151191615+	1	1	1	1	1	3	chr1	151161665	151191615	+	hsa_circ_1111791	circBase	NM_144618	GABPB2	sense overlapping	29951
chr1:151189868-151191615+	1	1	1	1	2	1	chr1	151189867	151191615	+	hsa_circ_1111797	circBase	NM_144618	GABPB2	sense overlapping	748
chr1:151195512-151199113-	1	1	2	1	1	1	chr1	151195511	151199113	-		novel	NM_131921	ANP32E	sense overlapping	3512
chr1:151198941-151199114-	2	1	1	1	1	1	chr1	151198939	151199114	-		novel	ENST11111369114	ANP32E	intronic	165
chr1:151198941-151211571-	1	2	1	2	1	1	chr1	151198939	151211571	-		novel	NM_131921	ANP32E	exonic	354
chr1:151212916-151214264-	1	2	1	2	6	1	chr1	151212915	151214264	-	hsa_circ_1114311	circBase	NM_131921	ANP32E	exonic	273
chr1:151288149-151288985-	1	2	1	1	1	6	chr1	151288148	151288985	-	hsa_circ_1116892	circBase	NM_112651	PI4KB	exonic	937
chr1:151373797-151374116+	1	1	1	1	1	2	chr1	151373796	151374116	+		novel	NM_112796	PSMB4	sense overlapping	311
chr1:151381576-151381314-	2	1	1	1	1	1	chr1	151381575	151381314	-	hsa_circ_1111819	circBase	NM_115111	POGZ	exonic	449
chr1:151411299-151413317-	1	1	3	1	1	1	chr1	151411298	151413317	-	hsa_circ_1118714	circBase	NM_115111	POGZ	exonic	795
chr1:151411299-151414681-	1	1	2	1	1	1	chr1	151411298	151414681	-	hsa_circ_1112521	circBase	NM_115111	POGZ	exonic	1179
chr1:151413399-151416853+	1	1	1	1	4	1	chr1	151413398	151416853	+	hsa_circ_1114437	circBase	NM_115213	RPRD2	exonic	359
chr1:151413414-151414681-	1	1	1	1	1	2	chr1	151413413	151414681	-	hsa_circ_1114178	circBase	NM_115111	POGZ	exonic	284
chr1:151416727-151431146+	1	1	2	1	1	1	chr1	151416726	151431146	+	hsa_circ_1111751	circBase	NM_115213	RPRD2	exonic	586
chr1:151416727-151437213+	1	1	1	1	1	2	chr1	151416726	151437213	+	hsa_circ_1111752	circBase	NM_115213	RPRD2	exonic	1145
chr1:151548215-151551466-	1	1	1	1	2	1	chr1	151548214	151551466	-		novel	NM_121961	MCL1	sense overlapping	3262
chr1:151549394-151549618-	1	1	3	1	1	1	chr1	151549393	151549618	-		novel	NM_121961	MCL1	sense overlapping	225
chr1:151593366-151593548-	1	2	1	1	1	1	chr1	151593365	151593548	-		novel	ENST11111369116	ENSA	intronic	183
chr1:151611364-151611595+	1	1	1	2	1	1	chr1	151611363	151611595	+	hsa_circ_1111131	circBase	NM_131918	SNX27	exonic	232	Alzheimer's disease, B-cell chronic lymphocytic leukemia, Burkitt lymphoma, Down syndrome (DS), Duchenne muscular dystrophy (DMD), Hodgkin's lymphoma, Oral Carcinoma, acute lymphoblastic leukemia (ALL), acute myeloid leukemia (AML), acute promyelocytic leukemia (APL), adenoma, autism spectrum disorder (ASD), breast cancer, cardiac hypertrophy, cervical cancer, cholangiocarcinoma, chronic lymphocy…
chr1:151611364-151641111+	3	2	3	10	2	6	chr1	151611363	151641111	+	hsa_circ_1111131	circBase	NM_131918	SNX27	exonic	838	Alzheimer's disease, B-cell chronic lymphocytic leukemia, Burkitt lymphoma, Down syndrome (DS), Duchenne muscular dystrophy (DMD), Hodgkin's lymphoma, Oral Carcinoma, acute lymphoblastic leukemia (ALL), acute myeloid leukemia (AML), acute promyelocytic leukemia (APL), adenoma, autism spectrum disorder (ASD), breast cancer, cardiac hypertrophy, cervical cancer, cholangiocarcinoma, chronic lymphocy…
chr1:151616967-151641111+	1	1	1	4	1	1	chr1	151616966	151641111	+		novel	NM_131918	SNX27	sense overlapping	34145
chr1:151631711-151631913+	1	4	1	1	2	1	chr1	151631711	151631913	+	hsa_circ_1114189	circBase	NM_131918	SNX27	exonic	193
chr1:151631711-151634746+	1	1	1	1	3	2	chr1	151631711	151634746	+	hsa_circ_1111813	circBase	NM_131918	SNX27	exonic	363
chr1:151631711-151641111+	2	1	1	1	3	1	chr1	151631711	151641111	+	hsa_circ_1112394	circBase	NM_131918	SNX27	exonic	616
chr1:151631711-151655921+	1	1	1	1	1	4	chr1	151631711	151655921	+	hsa_circ_1114191	circBase	NM_131918	SNX27	exonic	696
chr1:151686561-151692114-	1	1	1	1	1	2	chr1	151686561	151692114	-		novel	NM_132132	HORMAD1	exonic	312
chr1:151912443-151913914+	3	1	1	1	1	1	chr1	151912442	151913914	+	hsa_circ_1116851	circBase	NM_112432	SETDB1	exonic	287
chr1:151921598-151922111+	1	1	3	1	1	1	chr1	151921597	151922111	+	hsa_circ_1114163	circBase	NM_112432	SETDB1	exonic	313
chr1:151997187-151111421+	2	1	1	1	1	1	chr1	151997186	151111421	+	hsa_circ_1114186	circBase	NM_121222	PRUNE	exonic	598
chr1:151997187-151998149+	1	2	5	1	2	6	chr1	151997186	151998149	+	hsa_circ_1116761	circBase	NM_121222	PRUNE	exonic	344
chr1:151997187-151999813+	2	1	1	1	1	1	chr1	151997186	151999813	+	hsa_circ_1111126	circBase	NM_121222	PRUNE	exonic	439	Duchenne muscular dystrophy (DMD), acute myeloid leukemia (AML), breast cancer, cardiac hypertrophy, cholangiocarcinoma, chronic lymphocytic leukemia (CLL), colorectal cancer, facioscapulohumeral muscular dystrophy (FSHD), glioblastoma multiforme (GBM), head and neck squamous cell carcinoma (HNSCC), kidney cancer, limb-girdle muscular dystrophies types 2A (LGMD2A), lung cancer, malignant melanoma…
chr1:151997991-151111421+	1	1	1	1	4	1	chr1	151997991	151111421	+	hsa_circ_1114187	circBase	NM_121222	PRUNE	exonic	413
chr1:152185595-152193786+	1	1	1	1	2	1	chr1	152185594	152193786	+		novel	ENST11111421717	FLG-AS1	intronic	8192
chr1:152221371-152224234+	1	1	1	1	4	1	chr1	152221371	152224234	+	hsa_circ_1111826	circBase	ENST11111421717	FLG-AS1	exonic	224
chr1:153637696-153641133-	1	1	2	1	1	1	chr1	153637695	153641133	-	hsa_circ_1111133	circBase	NM_114515	ILF2	exonic	469	acute lymphoblastic leukemia (ALL), acute myeloid leukemia (AML), bladder cancer, breast cancer, cardiac hypertrophy, cervical cancer, chronic lymphocytic leukemia (CLL), colorectal cancer, epithelial ovarian cancer (EOC), glioblastoma, hepatocellular carcinoma (HCC), kidney cancer, lung cancer, malignant melanoma, neuroblastoma (NB), pancreatic cancer, prostate cancer, retinitis pigmentosa (RP),…
chr1:153735214-153737539+	1	1	1	1	2	1	chr1	153735213	153737539	+	hsa_circ_1116939	circBase	NM_123115	INTS3	exonic	574
chr1:153788749-153811824-	2	1	1	1	1	1	chr1	153788748	153811824	-		novel	NM_121699	GATAD2B	exonic	1217
chr1:153791267-153792211-	1	2	2	1	2	1	chr1	153791266	153792211	-	hsa_circ_1111835	circBase	NM_121699	GATAD2B	exonic	262
chr1:153791267-153811824-	1	1	1	1	1	2	chr1	153791266	153811824	-		novel	NM_121699	GATAD2B	exonic	598
chr1:154179312-154179949-	1	1	2	1	1	1	chr1	154179311	154179949	-		novel	NM_115449	C1orf43	sense overlapping	648
chr1:154197561-154211211+	1	1	1	2	1	1	chr1	154197559	154211211	+	hsa_circ_1114371	circBase	NM_114847	UBAP2L	exonic	319
chr1:154221715-154224129+	1	2	1	1	1	1	chr1	154221714	154224129	+	hsa_circ_1116433	circBase	NM_114847	UBAP2L	exonic	651
chr1:154223517-154224129+	1	1	4	2	1	1	chr1	154223516	154224129	+	hsa_circ_1114717	circBase	NM_114847	UBAP2L	exonic	451
chr1:154231453-154232515+	1	1	1	1	1	2	chr1	154231452	154232515	+	hsa_circ_1114415	circBase	NM_114847	UBAP2L	exonic	136
chr1:154561127-154569743-	1	1	1	2	1	1	chr1	154561126	154569743	-	hsa_circ_1115423	circBase	NM_111111	ADAR	exonic	951
chr1:155313115-155317695-	1	1	1	1	2	1	chr1	155313114	155317695	-	hsa_circ_1111869	circBase	NM_118489	ASH1L	exonic	739
chr1:155322497-155324421-	1	1	1	1	1	2	chr1	155322496	155324421	-	hsa_circ_1111871	circBase	NM_118489	ASH1L	exonic	311
chr1:155324264-155331211-	1	1	1	1	1	2	chr1	155324263	155331211	-		novel	NM_118489	ASH1L	exonic	527
chr1:155341295-155341774-	1	2	1	2	1	1	chr1	155341294	155341774	-	hsa_circ_1117618	circBase	NM_118489	ASH1L	exonic	354
chr1:155341295-155365344-	1	2	1	1	1	1	chr1	155341294	155365344	-	hsa_circ_1114577	circBase	NM_118489	ASH1L	exonic	678
chr1:155348172-155385714-	1	1	1	2	1	1	chr1	155348171	155385714	-	hsa_circ_1112897	circBase	NM_118489	ASH1L	exonic	514
chr1:155348172-155429689-	1	1	1	1	2	1	chr1	155348171	155429689	-	hsa_circ_1114581	circBase	NM_118489	ASH1L	exonic	1348
chr1:155365251-155374141-	1	1	3	1	1	1	chr1	155365249	155374141	-		novel	NM_118489	ASH1L	sense overlapping	8892
chr1:155365251-155429689-	1	1	1	2	1	1	chr1	155365249	155429689	-	hsa_circ_1114584	circBase	NM_118489	ASH1L	exonic	1119
chr1:155418118-155418859-	3	1	1	5	1	6	chr1	155418117	155418859	-	hsa_circ_1111137	circBase	NM_118489	ASH1L	exonic	742	Alzheimer's disease, PFV-1 infection, acute myeloid leukemia (AML), colorectal cancer, hepatocellular carcinoma (HCC), lung cancer, multiple myeloma (MM), multiple sclerosis, ovarian cancer (OC), pancreatic cancer, prostate cancer, testicular germ cell tumor, uterine leiomyoma (ULM)
chr1:155418118-155429689-	3	4	4	3	12	3	chr1	155418117	155429689	-	hsa_circ_1113247	circBase	NM_118489	ASH1L	exonic	844
chr1:155418118-155491419-	1	1	1	1	1	2	chr1	155418117	155491419	-		novel	NM_118489	ASH1L	exonic	5927
chr1:155439276-155439989-	1	2	1	1	1	1	chr1	155439275	155439989	-		novel	ENST11111368346	ASH1L	intronic	714
chr1:155448512-155448672-	1	1	2	1	1	1	chr1	155448511	155448672	-		novel	NM_118489	ASH1L	sense overlapping	171
chr1:155491891-155491419-	1	1	1	1	1	4	chr1	155491891	155491419	-	hsa_circ_1114592	circBase	NM_118489	ASH1L	exonic	519
chr1:155644811-155646537-	1	1	1	1	1	2	chr1	155644811	155646537	-		novel	NM_118253	YY1AP1	exonic	286
chr1:155644811-155649313-	2	3	2	3	13	3	chr1	155644811	155649313	-	hsa_circ_1113618	circBase	NM_118253	YY1AP1	exonic	391
chr1:155644811-155651247-	1	1	1	1	6	1	chr1	155644811	155651247	-	hsa_circ_1111888	circBase	NM_118253	YY1AP1	exonic	512
chr1:155646339-155649313-	1	6	1	4	9	3	chr1	155646338	155649313	-	hsa_circ_1114616	circBase	NM_118253	YY1AP1	exonic	313
chr1:155686797-155695811+	1	1	3	1	1	1	chr1	155686796	155695811	+	hsa_circ_1114611	circBase	NM_114632	DAP3	exonic	427
chr1:155691318-155695811+	3	2	1	1	1	1	chr1	155691317	155695811	+	hsa_circ_1114613	circBase	NM_114632	DAP3	exonic	314
chr1:155695173-155695811+	1	2	2	6	2	4	chr1	155695172	155695811	+	hsa_circ_1114614	circBase	NM_114632	DAP3	exonic	212
chr1:155695173-155697529+	1	1	1	1	2	1	chr1	155695172	155697529	+	hsa_circ_1114615	circBase	NM_114632	DAP3	exonic	333
chr1:155742857-155747611-	1	1	2	1	1	1	chr1	155742856	155747611	-	hsa_circ_1111911	circBase	NM_132292	GON4L	exonic	613
chr1:155764841-155796819-	1	1	1	1	1	2	chr1	155764841	155796819	-	hsa_circ_1111914	circBase	NM_132292	GON4L	exonic	1242
chr1:155783425-155784241-	1	1	1	2	1	1	chr1	155783424	155784241	-	hsa_circ_1111917	circBase	NM_132292	GON4L	exonic	291
chr1:155823167-155823597-	1	7	1	5	1	5	chr1	155823166	155823597	-	hsa_circ_1111139	circBase	NM_132292	GON4L	exonic	531
chr1:155891166-155891719-	1	1	2	1	1	1	chr1	155891165	155891719	-	hsa_circ_1118998	circBase	NM_114949	KIAA1917	exonic	312
chr1:155891166-155895634-	1	1	1	1	3	1	chr1	155891165	155895634	-	hsa_circ_1111141	circBase	NM_114949	KIAA1917	exonic	585	B-cell chronic lymphocytic leukemia, Cerebellar neurodegeneration, Hodgkin's lymphoma, Intrahepatic cholangiocarcinoma (ICC), acute lymphoblastic leukemia (ALL), acute myeloid leukemia (AML), acute promyelocytic leukemia (APL), adrenocortical carcinoma, asthma, autism spectrum disorder (ASD), bladder cancer, breast cancer, cardiac hypertrophy, chronic lymphocytic leukemia (CLL), chronic pancreati…
chr1:155927514-155928187-	1	1	2	1	1	1	chr1	155927513	155928187	-	hsa_circ_1114651	circBase	NM_114723	ARHGEF2	exonic	247
chr1:155946334-155946643-	1	1	1	1	3	1	chr1	155946333	155946643	-		novel	ENST11111313667	ARHGEF2	intronic	311
chr1:156294763-156314719-	1	1	1	2	1	1	chr1	156294762	156314719	-	hsa_circ_1115131	circBase	NM_115998	CCT3	exonic	329
chr1:156313338-156314719-	2	1	1	2	2	1	chr1	156313337	156314719	-	hsa_circ_1114681	circBase	NM_115998	CCT3	exonic	211
chr1:157493129-157494347-	3	1	1	1	1	1	chr1	157493128	157494347	-		novel	NM_131281	FCRL5	sense overlapping	1319
chr1:157651492-157666117-	1	2	1	1	1	1	chr1	157651491	157666117	-		novel	NM_152939	FCRL3	exonic	1182
chr1:157751111-157751265-	1	1	2	1	1	1	chr1	157751199	157751265	-		novel			intergenic	166
chr1:158261993-158261172+	1	1	1	1	2	1	chr1	158261992	158261172	+		novel	NM_111765	CD1C	sense overlapping	181
chr1:1583739-1646968-	1	1	1	1	4	1	chr1	1583738	1646968	-		novel	NM_133487	CDK11B	intronic	63231
chr1:15861732-15863319+	1	5	2	1	1	1	chr1	15861731	15863319	+	hsa_circ_1111118	circBase	NM_115291	DNAJC16	exonic	417	Alzheimer's disease, Burkitt lymphoma, Down syndrome (DS), Duchenne muscular dystrophy (DMD), Hodgkin's lymphoma, T-cell leukemia, acute lymphoblastic leukemia (ALL), acute myeloid leukemia (AML), acute promyelocytic leukemia (APL), adenoma, breast cancer, cardiac hypertrophy, cervical cancer, cholangiocarcinoma, chronic lymphocytic leukemia (CLL), colorectal cancer, diffuse large B-cell lymphoma…
chr1:15861732-15893764+	3	2	3	11	2	6	chr1	15861731	15893764	+	hsa_circ_1111144	circBase	NM_115291	DNAJC16	exonic	1782
chr1:158946491-158988441+	1	2	1	1	1	1	chr1	158946491	158988441	+		novel	NM_115531	IFI16	sense overlapping	41951
chr1:158979793-158991319+	1	1	1	1	1	2	chr1	158979792	158991319	+		novel	NM_115531	IFI16	sense overlapping	11527
chr1:158979793-159112481+	1	1	1	1	1	2	chr1	158979792	159112481	+		novel	NM_115531	IFI16	sense overlapping	22689
chr1:159121516-159121858+	1	2	1	2	1	2	chr1	159121515	159121858	+		novel	ENST11111295819	IFI16	intronic	343
chr1:15956821-15971145+	1	1	1	3	4	2	chr1	15956819	15971145	+	hsa_circ_1111151	circBase	NM_132341	DDI2	exonic	621
chr1:15956821-15978391+	2	4	1	8	2	2	chr1	15956819	15978391	+	hsa_circ_1111152	circBase	NM_132341	DDI2	exonic	915
chr1:15964812-15971145+	8	5	5	1	1	1	chr1	15964811	15971145	+	hsa_circ_1111119	circBase	NM_132341	DDI2	exonic	257	acute lymphoblastic leukemia (ALL), acute myeloid leukemia (AML), cardiac hypertrophy, colorectal cancer, lung cancer, non-alcoholic fatty liver disease (NAFLD), prostate cancer
chr1:1611113-1666274-	1	1	2	1	1	1	chr1	1611112	1666274	-	hsa_circ_1111116	circBase	NM_111787	CDK11B	sense overlapping	65172	Alzheimer's disease, B-cell chronic lymphocytic leukemia, B-cell lymphoma, Burkitt lymphoma, Cerebellar neurodegeneration, Down syndrome (DS), Duchenne muscular dystrophy (DMD), Glomerulosclerosis, Hodgkin's lymphoma, Inclusion body myositis (IBM), Intrahepatic cholangiocarcinoma (ICC), T-cell leukemia, acute lymphoblastic leukemia (ALL), acute myeloid leukemia (AML), acute promyelocytic leukemia…
chr1:161123794-161128586-	1	2	1	1	1	1	chr1	161123793	161128586	-		novel	ENST11111368115	ARHGAP31	intronic	4793
chr1:161281658-161312347-	1	1	1	2	1	1	chr1	161281657	161312347	-	hsa_circ_1114926	circBase	NM_114371	COPA	exonic	691
chr1:161293221-161312347-	1	1	2	5	2	2	chr1	161293221	161312347	-	hsa_circ_1118661	circBase	NM_114371	COPA	exonic	321
chr1:16144388-16147883+	2	2	2	8	6	4	chr1	16144387	16147883	+	hsa_circ_1111121	circBase	NM_115164	PLEKHM2	exonic	435	acute lymphoblastic leukemia (ALL), cervical cancer, pancreatic ductal adenocarcinoma (PDAC), uterine leiomyoma (ULM)
chr1:161593886-161614687-	1	1	3	1	1	1	chr1	161593885	161614687	-	hsa_circ_1114952	circBase	NM_113137	SLAMF1	exonic	375
chr1:161748134-161753886+	1	2	1	1	1	1	chr1	161748133	161753886	+	hsa_circ_1113139	circBase	NM_117348	ATF6	exonic	272
chr1:161748134-161772162+	1	1	1	2	1	1	chr1	161748133	161772162	+	hsa_circ_1117361	circBase	NM_117348	ATF6	exonic	827
chr1:161761198-161772162+	1	1	2	1	1	1	chr1	161761197	161772162	+		novel	NM_117348	ATF6	exonic	555
chr1:161811111-161812521-	2	1	1	1	1	1	chr1	161811999	161812521	-		novel	NM_116382	CD244	sense overlapping	1522
chr1:161816239-161833112+	1	3	1	1	1	2	chr1	161816238	161833112	+	hsa_circ_1118857	circBase	NM_117348	ATF6	exonic	532
chr1:161821512-161833112+	1	1	1	2	1	1	chr1	161821511	161833112	+	hsa_circ_1111996	circBase	NM_117348	ATF6	exonic	411
chr1:16235816-16237796+	6	1	3	1	1	1	chr1	16235815	16237796	+	hsa_circ_1111119	circBase	NM_115111	SPEN	exonic	362
chr1:16237596-16242774+	2	1	2	8	6	5	chr1	16237595	16242774	+	hsa_circ_1111113	circBase	NM_115111	SPEN	exonic	353
chr1:162574974-162575135+	1	1	2	1	1	1	chr1	162574973	162575135	+		novel			intergenic	162
chr1:16263658-16264511+	11	4	5	31	1	5	chr1	16263657	16264511	+	hsa_circ_1111117	circBase	NM_115111	SPEN	exonic	678
chr1:165648679-165664634-	1	1	2	1	1	1	chr1	165648678	165664634	-	hsa_circ_1113114	circBase	NM_111696	ALDH9A1	exonic	749
chr1:165859441-165865569+	1	1	1	1	1	4	chr1	165859441	165865569	+	hsa_circ_1118154	circBase	NM_112474	UCK2	exonic	411
chr1:165877696-165879892+	1	1	1	1	2	1	chr1	165877695	165879892	+		novel	NM_112474	UCK2	sense overlapping	2197
chr1:16621278-16643166-	2	1	2	11	2	5	chr1	16621277	16643166	-		novel	NM_118994	FBXO42	sense overlapping	21789
chr1:167311717-167385422+	1	1	1	1	1	2	chr1	167311716	167385422	+		novel	NM_112697	POU2F1	sense overlapping	83716
chr1:167515338-167517358-	3	1	1	1	1	1	chr1	167515337	167517358	-	hsa_circ_1111168	circBase	NM_113851	CREG1	exonic	315
chr1:167734821-167742615+	1	1	1	1	3	1	chr1	167734819	167742615	+	hsa_circ_1115117	circBase	NM_113953	MPZL1	exonic	514
chr1:167734821-167745413+	1	1	1	1	5	1	chr1	167734819	167745413	+	hsa_circ_1111153	circBase	NM_113953	MPZL1	exonic	617	epithelial ovarian cancer (EOC), malignant melanoma
chr1:167921138-167944253+	2	1	1	3	1	1	chr1	167921137	167944253	+	hsa_circ_1111154	circBase	NM_118442	DCAF6	exonic	341	Alzheimer's disease, acute myeloid leukemia (AML), bladder cancer, breast cancer, cardiac hypertrophy, colorectal cancer, epithelial ovarian cancer (EOC), hepatocellular carcinoma (HCC), kidney cancer, lung cancer, malignant melanoma, multiple myeloma (MM), pituitary adenoma, prostate cancer, retinitis pigmentosa (RP), schizophrenia
chr1:167935867-167944253+	1	1	2	5	1	4	chr1	167935866	167944253	+	hsa_circ_1119119	circBase	NM_118442	DCAF6	exonic	279
chr1:168117619-168137711+	1	1	1	3	1	1	chr1	168117618	168137711	+	hsa_circ_1115132	circBase	NM_118442	DCAF6	exonic	1141
chr1:168134828-168137711+	1	1	3	1	1	1	chr1	168134827	168137711	+	hsa_circ_1111179	circBase	NM_118442	DCAF6	exonic	352
chr1:168198841-168212317+	1	1	2	1	1	1	chr1	168198839	168212317	+		novel	uc111gfj.4	TBX19	intronic	13468
chr1:168211752-168218398+	1	2	1	1	1	1	chr1	168211751	168218398	+	hsa_circ_1116593	circBase	NM_199344	SFT2D2	exonic	381
chr1:16891312-16893846-	12	8	14	61	45	32	chr1	16891311	16893846	-		novel	NM_117941	NBPF1	exonic	515
chr1:16912762-16917987-	11	16	12	41	43	28	chr1	16912761	16917987	-		novel	NM_117941	NBPF1	exonic	813
chr1:169292355-169293738-	1	1	4	1	1	1	chr1	169292354	169293738	-	hsa_circ_1115157	circBase	NM_113331	NME7	exonic	275
chr1:169446393-169446995-	1	1	1	2	1	1	chr1	169446392	169446995	-	hsa_circ_1115164	circBase	NM_116996	SLC19A2	exonic	613
chr1:169661217-169661718-	1	1	1	2	1	1	chr1	169661216	169661718	-		novel	NM_111655	SELL	sense overlapping	512
chr1:169771762-169773381+	1	1	4	1	1	1	chr1	169771761	169773381	+		novel	NM_118186	C1orf112	exonic	412
chr1:169947226-171111116-	1	4	1	4	11	5	chr1	169947225	171111116	-	hsa_circ_1111121	circBase	NM_114971	KIFAP3	sense overlapping	53891
chr1:171492361-171496983+	2	1	1	1	1	1	chr1	171492359	171496983	+	hsa_circ_1113644	circBase	NM_115172	PRRC2C	exonic	421
chr1:171492361-171512111+	2	1	3	3	9	1	chr1	171492359	171512111	+	hsa_circ_1115211	circBase	NM_115172	PRRC2C	exonic	1141
chr1:171492361-171516612+	1	1	1	2	2	1	chr1	171492359	171516612	+	hsa_circ_1111133	circBase	NM_115172	PRRC2C	exonic	1671
chr1:171493961-171512111+	1	1	1	1	3	1	chr1	171493959	171512111	+	hsa_circ_1111134	circBase	NM_115172	PRRC2C	exonic	818
chr1:171516461-171519429+	1	1	1	1	3	1	chr1	171516459	171519429	+		novel	NM_115172	PRRC2C	sense overlapping	2971
chr1:171537386-171544267+	1	5	4	5	3	2	chr1	171537385	171544267	+	hsa_circ_1114412	circBase	NM_115172	PRRC2C	exonic	397
chr1:171548967-171553665+	1	3	1	1	1	1	chr1	171548966	171553665	+		novel	NM_115172	PRRC2C	exonic	477
chr1:1717571-1717889-	1	1	1	1	2	1	chr1	1717571	1717889	-		novel	NM_112174	GNB1	sense overlapping	319
chr1:172521652-172526934+	1	2	1	1	5	4	chr1	172521651	172526934	+	hsa_circ_1111161	circBase	NM_114283	SUCO	exonic	671	Alzheimer's disease, Burkitt lymphoma, Down syndrome (DS), Hodgkin's lymphoma, acute lymphoblastic leukemia (ALL), acute myeloid leukemia (AML), acute promyelocytic leukemia (APL), adenoma, breast cancer, cardiac hypertrophy, cervical cancer, cholangiocarcinoma, chronic lymphocytic leukemia (CLL), colorectal cancer, diffuse large B-cell lymphoma (DLBCL), epithelial ovarian cancer (EOC), facioscap…
chr1:172521652-172539871+	1	1	1	2	1	1	chr1	172521651	172539871	+	hsa_circ_1115259	circBase	NM_114283	SUCO	exonic	987
chr1:172525119-172526934+	3	1	1	1	2	1	chr1	172525118	172526934	+	hsa_circ_1115262	circBase	NM_114283	SUCO	exonic	444
chr1:172525119-172539871+	1	1	1	3	4	2	chr1	172525118	172539871	+	hsa_circ_1111166	circBase	NM_114283	SUCO	exonic	761
chr1:172526421-172539871+	1	1	1	1	2	1	chr1	172526419	172539871	+		novel	NM_114283	SUCO	exonic	616
chr1:17349113-17351569-	2	3	1	5	11	7	chr1	17349112	17351569	-	hsa_circ_1111181	circBase	NM_113111	SDHB	exonic	225
chr1:1735858-1737977-	4	1	2	2	1	1	chr1	1735857	1737977	-	hsa_circ_1111117	circBase	NM_112174	GNB1	exonic	227
chr1:1735858-1749314-	1	1	1	2	1	3	chr1	1735857	1749314	-	hsa_circ_1119353	circBase	NM_112174	GNB1	exonic	373
chr1:1735858-1756938-	3	1	1	1	1	1	chr1	1735857	1756938	-	hsa_circ_1116869	circBase	NM_112174	GNB1	exonic	476
chr1:173593926-173596298-	1	1	1	1	1	2	chr1	173593925	173596298	-	hsa_circ_1111188	circBase	NM_198493	ANKRD45	exonic	234
chr1:173795825-173814429+	1	1	1	1	1	2	chr1	173795824	173814429	+		novel	NM_118122	DARS2	exonic	1164
chr1:173961893-173962273-	1	1	1	1	2	1	chr1	173961892	173962273	-	hsa_circ_1114927	circBase	ENST11111367696	RC3H1	exonic	381
chr1:174191111-174219771+	1	1	1	1	8	1	chr1	174191119	174219771	+		novel	NM_114857	RABGAP1L	exonic	737
chr1:174191111-174221728+	2	1	1	1	1	1	chr1	174191119	174221728	+		novel	NM_114857	RABGAP1L	exonic	848
chr1:174191111-174274265+	1	1	1	1	2	1	chr1	174191119	174274265	+		novel	NM_114857	RABGAP1L	exonic	1327
chr1:174211621-174247917+	3	1	1	2	1	1	chr1	174211621	174247917	+	hsa_circ_1111221	circBase	NM_114857	RABGAP1L	exonic	781
chr1:174219613-174247917+	2	1	1	2	1	1	chr1	174219612	174247917	+	hsa_circ_1111222	circBase	NM_114857	RABGAP1L	exonic	616
chr1:174241552-174247917+	1	1	1	4	1	2	chr1	174241551	174247917	+	hsa_circ_1111161	circBase	NM_114857	RABGAP1L	exonic	337	Alzheimer's disease, B-cell chronic lymphocytic leukemia, Duchenne muscular dystrophy (DMD), Oral Carcinoma, acute myeloid leukemia (AML), acute promyelocytic leukemia (APL), autism spectrum disorder (ASD), breast cancer, chronic lymphocytic leukemia (CLL), colorectal cancer, glioblastoma, glioma, hepatocellular carcinoma (HCC), lung cancer, multiple myeloma (MM), nemaline myopathy (NM), pancreat…
chr1:174241552-174341211+	2	1	1	1	1	1	chr1	174241551	174341211	+	hsa_circ_1115331	circBase	NM_114857	RABGAP1L	exonic	573
chr1:174274124-174363283+	1	1	1	1	1	2	chr1	174274123	174363283	+	hsa_circ_1111227	circBase	NM_114857	RABGAP1L	exonic	387
chr1:174668663-174671394+	1	1	1	1	1	2	chr1	174668662	174671394	+	hsa_circ_1111233	circBase	NM_114857	RABGAP1L	exonic	271
chr1:1747195-1756938-	1	1	1	1	3	1	chr1	1747194	1756938	-	hsa_circ_1111118	circBase	NM_112174	GNB1	exonic	249
chr1:1747195-1771677-	1	1	1	5	1	4	chr1	1747194	1771677	-	hsa_circ_1118712	circBase	NM_112174	GNB1	exonic	298
chr1:176112322-176115461-	1	3	1	1	2	1	chr1	176112321	176115461	-	hsa_circ_1115357	circBase	NM_122457	RFWD2	exonic	335
chr1:176113141-176118211-	1	1	1	2	1	1	chr1	176113141	176118211	-		novel	NM_122457	RFWD2	sense overlapping	5171
chr1:176113141-176133127-	1	1	1	1	2	1	chr1	176113141	176133127	-	hsa_circ_1111269	circBase	NM_122457	RFWD2	sense overlapping	19887
chr1:176114146-176133127-	1	1	1	1	3	1	chr1	176114145	176133127	-	hsa_circ_1118566	circBase	NM_122457	RFWD2	exonic	413
chr1:176118142-176133127-	1	1	1	2	1	1	chr1	176118141	176133127	-	hsa_circ_1115376	circBase	NM_122457	RFWD2	exonic	266
chr1:176118142-176145143-	1	1	2	1	1	1	chr1	176118141	176145143	-	hsa_circ_1115288	circBase	NM_122457	RFWD2	exonic	364
chr1:176151288-176115683-	1	1	1	1	2	5	chr1	176151287	176115683	-	hsa_circ_1113572	circBase	NM_122457	RFWD2	exonic	446
chr1:176185761-176115683-	1	1	1	1	2	1	chr1	176185759	176115683	-	hsa_circ_1115373	circBase	NM_122457	RFWD2	exonic	195
chr1:176185761-176145143-	1	1	1	1	2	1	chr1	176185759	176145143	-	hsa_circ_1111265	circBase	NM_122457	RFWD2	exonic	559
chr1:17734798-17735652-	6	1	1	1	11	3	chr1	17734797	17735652	-		novel	NM_118715	RCC2	sense overlapping	855
chr1:178144777-178145153+	1	1	1	1	2	1	chr1	178144776	178145153	+		novel	ENST11111367649	RASAL2	intronic	277
chr1:178676312-178754742+	1	1	1	1	1	2	chr1	178676311	178754742	+		novel	NM_152663	RALGPS2	sense overlapping	78441
chr1:178745817-178754742+	1	2	1	9	6	9	chr1	178745816	178754742	+	hsa_circ_1111162	circBase	NM_152663	RALGPS2	exonic	296
chr1:178777181-178812685+	1	2	1	1	1	1	chr1	178777179	178812685	+	hsa_circ_1115411	circBase	NM_152663	RALGPS2	exonic	394
chr1:178781451-178812685+	1	1	1	1	2	1	chr1	178781449	178812685	+		novel	NM_152663	RALGPS2	exonic	311
chr1:178846633-178852668+	1	1	1	1	1	2	chr1	178846632	178852668	+	hsa_circ_1115414	circBase	NM_152663	RALGPS2	exonic	297
chr1:178846633-178863159+	1	1	1	2	1	1	chr1	178846632	178863159	+	hsa_circ_1111321	circBase	NM_152663	RALGPS2	exonic	824
chr1:178846633-178886111+	1	1	2	1	1	1	chr1	178846632	178886111	+		novel	NM_152663	RALGPS2	sense overlapping	39369
chr1:179111446-179112519-	1	3	1	1	1	1	chr1	179111445	179112519	-	hsa_circ_1114996	circBase	NM_115158	ABL2	exonic	234
chr1:179112851-179123773+	1	1	1	1	1	2	chr1	179112849	179123773	+	hsa_circ_1115977	circBase	NM_114864	FAM21B	exonic	717
chr1:179112953-179113129+	1	1	1	1	4	1	chr1	179112952	179113129	+		novel	NM_114864	FAM21B	sense overlapping	177
chr1:179133162-179133631+	3	1	1	1	1	1	chr1	179133161	179133631	+	hsa_circ_1118653	circBase	NM_114864	FAM21B	exonic	364
chr1:179154763-179155128+	1	1	1	1	1	3	chr1	179154762	179155128	+		novel	NM_122371	TOR3A	exonic	266
chr1:179178343-179111613-	2	1	1	1	1	1	chr1	179178342	179111613	-		novel	NM_115158	ABL2	sense overlapping	22271
chr1:179179417-179191112-	1	1	1	3	1	1	chr1	179179416	179191112	-	hsa_circ_1111329	circBase	NM_115158	ABL2	exonic	1138
chr1:179189325-179191112-	1	1	1	1	1	2	chr1	179189324	179191112	-	hsa_circ_1115431	circBase	NM_115158	ABL2	exonic	358
chr1:179314641-179311445+	1	1	1	1	2	1	chr1	179314641	179311445	+	hsa_circ_1115437	circBase	NM_113111	SOAT1	exonic	613
chr1:179316735-179319566+	15	6	5	5	5	3	chr1	179316734	179319566	+	hsa_circ_1115454	circBase	NM_113111	SOAT1	exonic	333
chr1:179318573-179318177+	1	1	2	1	1	1	chr1	179318572	179318177	+	hsa_circ_1115443	circBase	NM_113111	SOAT1	exonic	925
chr1:17971618-17971781+	2	5	7	17	12	11	chr1	17971617	17971781	+		novel	ENST11111167825	ARHGEF11L	intronic	164
chr1:179955314-179961356+	2	1	1	1	1	1	chr1	179955313	179961356	+	hsa_circ_1111361	circBase	NM_114811	CEP351	exonic	418
chr1:179955314-179975712+	1	1	1	3	1	1	chr1	179955313	179975712	+	hsa_circ_1111364	circBase	NM_114811	CEP351	exonic	1259
chr1:179955314-181113217+	1	1	1	1	3	1	chr1	179955313	181113217	+		novel	NM_114811	CEP351	exonic	3959
chr1:179959642-179966311+	1	1	3	1	1	1	chr1	179959641	179966311	+	hsa_circ_1111365	circBase	NM_114811	CEP351	exonic	898
chr1:179972319-179975712+	4	1	2	1	1	6	chr1	179972318	179975712	+	hsa_circ_1113942	circBase	NM_114811	CEP351	exonic	228
chr1:181112997-181116224+	1	2	1	1	1	1	chr1	181112996	181116224	+	hsa_circ_1111374	circBase	NM_114811	CEP351	exonic	385
chr1:181147598-181149796+	1	1	1	1	1	2	chr1	181147597	181149796	+	hsa_circ_1115491	circBase	NM_114811	CEP351	exonic	357
chr1:181366651-181382616-	1	1	2	1	1	1	chr1	181366651	181382616	-	hsa_circ_1119175	circBase	NM_132361	ACBD6	exonic	196
chr1:181366651-181399397-	1	1	1	2	1	1	chr1	181366651	181399397	-	hsa_circ_1111164	circBase	NM_132361	ACBD6	exonic	279	acute lymphoblastic leukemia (ALL), acute myeloid leukemia (AML), bladder cancer, cardiac hypertrophy, cervical cancer, chronic lymphocytic leukemia (CLL), glioblastoma, hepatocellular carcinoma (HCC), lung cancer, malignant melanoma, multiple myeloma (MM), neuroblastoma (NB), pancreatic cancer, prostate cancer, uterine leiomyoma (ULM)
chr1:181546912-181549912+	1	1	1	1	1	4	chr1	181546911	181549912	+	hsa_circ_1115537	circBase	NM_111721	CACNA1E	exonic	439
chr1:181619839-181611653+	1	1	2	1	1	1	chr1	181619838	181611653	+		PMID:25171511	GSE61474_TCONS_11112774	GSE61474_XLOC_112428	intronic	815
chr1:181793889-181794481+	1	1	1	1	2	1	chr1	181793888	181794481	+	hsa_circ_1115919	circBase	NM_114736	XPR1	exonic	371
chr1:181953813-181962561-	2	6	7	19	9	11	chr1	181953812	181962561	-	hsa_circ_1117915	circBase	NM_115819	STX6	exonic	391
chr1:181953813-181974599-	2	2	1	5	2	8	chr1	181953812	181974599	-	hsa_circ_1116796	circBase	NM_115819	STX6	exonic	656
chr1:181971742-181974599-	1	1	2	1	1	2	chr1	181971741	181974599	-	hsa_circ_1115529	circBase	NM_115819	STX6	exonic	265
chr1:182353541-182354679-	1	1	1	1	2	1	chr1	182353539	182354679	-		novel	NM_112165	GLUL	sense overlapping	1141
chr1:182772833-182775666+	3	1	1	1	1	1	chr1	182772832	182775666	+		novel	NM_111211151	NPL	exonic	461
chr1:183183666-183184772+	1	1	2	1	2	1	chr1	183183665	183184772	+	hsa_circ_1114573	circBase	NM_112293	LAMC1	exonic	317
chr1:183471388-183486955+	1	1	1	3	1	1	chr1	183471387	183486955	+	hsa_circ_1115611	circBase	uc111pob.2	SMG7	exonic	422
chr1:184675777-184681111-	1	1	1	1	3	1	chr1	184675776	184681111	-	hsa_circ_1116517	circBase	NM_125191	EDEM3	exonic	667
chr1:184853767-184868442-	1	1	1	1	3	1	chr1	184853766	184868442	-	hsa_circ_1118713	circBase	NM_152966	FAM129A	exonic	546
chr1:185143514-185144245+	1	2	2	2	1	2	chr1	185143513	185144245	+	hsa_circ_1111471	circBase	NM_117673	SWT1	exonic	742
chr1:185153375-185159774+	2	1	1	1	1	1	chr1	185153374	185159774	+	hsa_circ_1115676	circBase	NM_117673	SWT1	exonic	385
chr1:185197811-185116928-	1	1	1	1	1	2	chr1	185197811	185116928	-		novel	NM_131934	TRMT1L	exonic	271
chr1:186294929-186295297-	1	1	1	1	3	1	chr1	186294928	186295297	-		novel	NR_131642	MIR548F1	intronic	369
chr1:186359843-186361923+	1	1	1	1	6	1	chr1	186359842	186361923	+	hsa_circ_1117538	circBase	NM_117847	C1orf27	exonic	237
chr1:186375215-186388219+	1	1	1	2	1	2	chr1	186375214	186388219	+	hsa_circ_1111166	circBase	NM_117847	C1orf27	sense overlapping	12995	Cerebellar neurodegeneration, acute myeloid leukemia (AML), cardiac hypertrophy, epithelial ovarian cancer (EOC), esophageal cancer, non-alcoholic fatty liver disease (NAFLD), pancreatic cancer, pituitary adenoma, prostate cancer
chr1:186375215-186421416+	1	1	1	3	1	1	chr1	186375214	186421416	+	hsa_circ_1111533	circBase	NM_117847	C1orf27	sense overlapping	45192
chr1:19244856-19246267-	1	1	1	18	11	11	chr1	19244855	19246267	-		novel	NM_111136265	IFFO2	exonic	237
chr1:193114521-193117313+	1	1	1	1	4	1	chr1	193114521	193117313	+	hsa_circ_1111571	circBase	NM_124529	CDC73	exonic	215
chr1:193116997-193123358+	1	1	2	1	1	1	chr1	193116996	193123358	+		novel	NM_124529	CDC73	sense overlapping	6362
chr1:193212123-193215486+	2	1	1	1	5	1	chr1	193212122	193215486	+	hsa_circ_1113821	circBase	NM_124529	CDC73	exonic	263
chr1:19486751-19488391-	3	2	1	15	4	6	chr1	19486749	19488391	-		novel	NM_121765	UBR4	sense overlapping	1642
chr1:197157422-197161129-	1	1	3	1	1	1	chr1	197157421	197161129	-	hsa_circ_1111632	circBase	NM_194314	ZBTB41	exonic	426
chr1:19718313-19719838-	1	1	1	12	11	11	chr1	19718312	19719838	-		novel	ENST11111264212	CAPZB	intronic	1526
chr1:197519194-197576314-	1	1	1	1	2	1	chr1	197519193	197576314	-		novel	NR_125341	DENND1B	exonic	513
chr1:197552282-197586889-	1	2	1	1	1	1	chr1	197552281	197586889	-	hsa_circ_1115779	circBase	NM_144977	DENND1B	exonic	477
chr1:197564338-197586889-	1	1	1	1	2	1	chr1	197564337	197586889	-	hsa_circ_1115782	circBase	NM_144977	DENND1B	exonic	375
chr1:197611841-197627499-	1	1	5	1	7	4	chr1	197611841	197627499	-	hsa_circ_1116324	circBase	NM_144977	DENND1B	exonic	376
chr1:197621365-197684214-	2	1	1	1	1	1	chr1	197621364	197684214	-	hsa_circ_1115798	circBase	NM_144977	DENND1B	exonic	365
chr1:197641167-197643299-	1	1	1	1	2	2	chr1	197641166	197643299	-	hsa_circ_1115799	circBase	NM_144977	DENND1B	exonic	171
chr1:198191129-198233365+	2	1	1	1	1	1	chr1	198191128	198233365	+	hsa_circ_1111169	circBase	NM_133494	NEK7	sense overlapping	43237	Alzheimer's disease, B-cell lymphoma, Hodgkin's lymphoma, T-cell leukemia, acute myeloid leukemia (AML), autism spectrum disorder (ASD), breast cancer, chronic lymphocytic leukemia (CLL), chronic myeloid leukemia (CML), colorectal cancer, diffuse large B-cell lymphoma (DLBCL), epithelial ovarian cancer (EOC), follicular lymphoma (FL), gastric cancer (stomach cancer), glioma, hepatocellular carcin…
chr1:198211683-198233365+	1	1	1	1	1	2	chr1	198211682	198233365	+	hsa_circ_1112528	circBase	NM_133494	NEK7	exonic	411
chr1:198211683-198248191+	1	1	1	1	4	1	chr1	198211682	198248191	+	hsa_circ_1115812	circBase	NM_133494	NEK7	exonic	617
chr1:198247191-198266371+	1	1	1	1	1	2	chr1	198247191	198266371	+	hsa_circ_1116267	circBase	NM_133494	NEK7	exonic	426
chr1:198699824-198711113+	1	1	1	2	1	1	chr1	198699823	198711113	+		novel	ENST11111348564	PTPRC	intronic	181
chr1:211113453-211114388+	1	1	1	1	3	1	chr1	211113452	211114388	+	hsa_circ_1116331	circBase	NM_114388	DIEXF	exonic	281
chr1:211471178-211471886-	1	1	1	1	1	2	chr1	211471177	211471886	-		novel	ENST11111341116	CSRP1	intronic	719
chr1:211526581-211527819+	4	7	2	1	6	2	chr1	211526581	211527819	+	hsa_circ_1117234	circBase	NM_114619	TRAF5	exonic	277
chr1:211526581-211529811+	1	1	3	1	1	1	chr1	211526581	211529811	+	hsa_circ_1111846	circBase	NM_114619	TRAF5	exonic	379
chr1:211551329-211561368-	1	1	2	1	1	1	chr1	211551328	211561368	-	hsa_circ_1111662	circBase	NM_114875	KIF14	exonic	683
chr1:211551329-211567549-	1	1	1	1	1	3	chr1	211551328	211567549	-	hsa_circ_1111664	circBase	NM_114875	KIF14	exonic	971
chr1:211567365-211578151-	1	1	1	1	1	3	chr1	211567364	211578151	-		novel	NM_114875	KIF14	sense overlapping	11687
chr1:211617567-211635879-	1	1	1	4	1	1	chr1	211617566	211635879	-	hsa_circ_1115832	circBase	NM_111131725	DDX59	exonic	1617
chr1:211635165-211635879-	1	1	1	1	1	3	chr1	211635164	211635879	-		novel	NM_111131725	DDX59	exonic	815
chr1:21167349-21191755-	1	6	2	1	1	2	chr1	21167348	21191755	-	hsa_circ_1111458	circBase	NM_113761	EIF4G3	exonic	1439
chr1:21171237-21176375-	1	2	1	7	13	8	chr1	21171236	21176375	-	hsa_circ_1117296	circBase	uc111bdy.1	HP1BP3	exonic	734
chr1:211729967-211776665+	1	1	1	1	3	1	chr1	211729966	211776665	+	hsa_circ_1115838	circBase	NM_213459	CAMSAP2	exonic	422
chr1:211729967-211784772+	4	1	1	16	2	4	chr1	211729966	211784772	+	hsa_circ_1115839	circBase	NM_213459	CAMSAP2	exonic	516
chr1:21174137-21111113-	1	2	4	9	5	1	chr1	21174136	21111113	-	hsa_circ_1111439	circBase	NM_116287	HP1BP3	exonic	913
chr1:21176216-21111113-	35	36	32	72	67	138	chr1	21176215	21111113	-	hsa_circ_1111123	circBase	NM_116287	HP1BP3	exonic	791	Alzheimer's disease, Cerebellar neurodegeneration, Duchenne muscular dystrophy (DMD), PFV-1 infection, acute myeloid leukemia (AML), breast cancer, cardiac hypertrophy, cholangiocarcinoma, chronic lymphocytic leukemia (CLL), colorectal cancer, endometrial cancer, epithelial ovarian cancer (EOC), esophageal cancer, facioscapulohumeral muscular dystrophy (FSHD), glioblastoma multiforme (GBM), head …
chr1:211816417-211817722+	1	1	2	2	1	2	chr1	211816416	211817722	+	hsa_circ_1113115	circBase	NM_118185	IPO9	exonic	351
chr1:211821232-211828122+	4	1	3	1	1	2	chr1	211821231	211828122	+	hsa_circ_1111713	circBase	NM_118185	IPO9	exonic	954
chr1:211823723-211841455+	1	1	1	1	1	2	chr1	211823722	211841455	+		novel	NM_118185	IPO9	exonic	1886
chr1:211826224-211828122+	1	1	1	1	1	4	chr1	211826223	211828122	+	hsa_circ_1111717	circBase	NM_118185	IPO9	exonic	346
chr1:21183659-21111113-	3	2	2	4	7	8	chr1	21183658	21111113	-	hsa_circ_1111124	circBase	NM_116287	HP1BP3	exonic	631	Duchenne muscular dystrophy (DMD), acute myeloid leukemia (AML), breast cancer, cardiac hypertrophy, cholangiocarcinoma, chronic lymphocytic leukemia (CLL), colorectal cancer, endometrial cancer, epithelial ovarian cancer (EOC), facioscapulohumeral muscular dystrophy (FSHD), glioblastoma multiforme (GBM), head and neck squamous cell carcinoma (HNSCC), kidney cancer, limb-girdle muscular dystrophi…
chr1:21191871-21111113-	2	11	11	4	1	1	chr1	21191869	21111113	-	hsa_circ_1112238	circBase	NM_116287	HP1BP3	exonic	541
chr1:211952261-211966532-	1	1	1	2	1	1	chr1	211952259	211966532	-	hsa_circ_1112274	circBase	NM_114873	LPGAT1	exonic	616
chr1:21197423-21111113-	1	1	2	3	4	4	chr1	21197422	21111113	-	hsa_circ_1115782	circBase	NM_116287	HP1BP3	exonic	314
chr1:21216878-21224155+	5	12	39	1	1	1	chr1	21216877	21224155	+		PMID:25242744	NM_115217	OTUD3	exonic	385
chr1:21221111-21221994-	6	5	4	1	2	1	chr1	21221119	21221994	-	hsa_circ_1111466	circBase	NM_113761	EIF4G3	exonic	254
chr1:212218112-212221759+	1	1	1	2	1	2	chr1	212218111	212221759	+	hsa_circ_1111179	circBase	NM_111286229	DTL	exonic	282
chr1:21231376-21268823-	2	2	1	4	5	4	chr1	21231375	21268823	-	hsa_circ_1111887	circBase	NM_113761	EIF4G3	exonic	929
chr1:212391748-212418299+	1	1	1	1	4	1	chr1	212391747	212418299	+	hsa_circ_1115985	circBase	NM_112481	PPP1R12B	exonic	1428
chr1:212396168-212418299+	1	2	1	1	2	1	chr1	212396167	212418299	+		novel	NM_112481	PPP1R12B	exonic	1149
chr1:21267752-21268823-	1	1	2	16	21	16	chr1	21267751	21268823	-		novel	ENST11111374935	EIF4G3	intronic	1172
chr1:21267984-21268823-	6	6	4	3	2	1	chr1	21267983	21268823	-	hsa_circ_1111474	circBase	NM_113761	EIF4G3	exonic	841
chr1:212724399-212733273-	1	1	1	2	1	1	chr1	212724398	212733273	-	hsa_circ_1114981	circBase	NM_116618	KDM5B	exonic	827
chr1:212957715-212961979-	1	1	1	1	1	4	chr1	212957714	212961979	-	hsa_circ_1111911	circBase	NM_115471	NSL1	exonic	211
chr1:213137167-213158738+	1	1	1	4	3	1	chr1	213137166	213158738	+	hsa_circ_1111182	circBase	NM_114153	FLVCR1	exonic	458
chr1:213137167-213161936+	1	1	1	1	3	1	chr1	213137166	213161936	+	hsa_circ_1116418	circBase	NM_114153	FLVCR1	exonic	675
chr1:213146121-213162599+	1	1	1	1	3	1	chr1	213146119	213162599	+	hsa_circ_1116414	circBase	NM_114153	FLVCR1	exonic	642
chr1:21316827-21317721-	4	2	11	4	2	1	chr1	21316826	21317721	-	hsa_circ_1111484	circBase	NM_113761	EIF4G3	exonic	295
chr1:213244348-213291752+	1	1	1	1	1	2	chr1	213244347	213291752	+	hsa_circ_1111917	circBase	NM_112424	RPS6KC1	exonic	367
chr1:213251138-213291752+	1	1	1	1	3	2	chr1	213251137	213291752	+	hsa_circ_1114849	circBase	NM_112424	RPS6KC1	exonic	331
chr1:21327692-21329311-	1	1	2	2	2	11	chr1	21327691	21329311	-	hsa_circ_1118171	circBase	ENST11111411888	EIF4G3	exonic	211
chr1:21327692-21415716-	12	15	2	1	1	1	chr1	21327691	21415716	-	hsa_circ_1111926	circBase	ENST11111411888	EIF4G3	exonic	286
chr1:213341211-213349835+	1	1	2	1	1	1	chr1	213341211	213349835	+	hsa_circ_1115314	circBase	NM_112424	RPS6KC1	exonic	219
chr1:213415912-213436159+	1	1	1	1	1	2	chr1	213415911	213436159	+	hsa_circ_1116433	circBase	NM_112424	RPS6KC1	exonic	269
chr1:213676137-213677232+	1	1	1	1	3	1	chr1	213676136	213677232	+	hsa_circ_1117167	circBase	NM_111684	ATP2B4	exonic	458
chr1:213689677-213691538+	1	1	1	1	2	1	chr1	213689676	213691538	+	hsa_circ_1116111	circBase	NM_111684	ATP2B4	exonic	416
chr1:213786154-213786252+	1	1	1	1	4	1	chr1	213786153	213786252	+		novel	NM_114827	ZC3H11A	exonic	199
chr1:213812919-213819512+	1	1	1	1	1	3	chr1	213812918	213819512	+	hsa_circ_1116113	circBase	NM_114827	ZC3H11A	exonic	231
chr1:21415631-21461527-	5	3	3	2	2	1	chr1	21415631	21461527	-		novel	NM_113761	EIF4G3	sense overlapping	44897
chr1:214169812-214178615+	2	1	1	1	1	1	chr1	214169811	214178615	+	hsa_circ_1116436	circBase	NM_112763	PROX1	exonic	1911
chr1:214373351-214373881-	1	2	1	1	1	1	chr1	214373349	214373881	-		novel	NM_132833	PPP1R15B	sense overlapping	532
chr1:214437998-214439114-	1	1	1	1	1	2	chr1	214437997	214439114	-	hsa_circ_1111174	circBase	NM_112646	PIK3C2B	exonic	1117	Alzheimer's disease, Burkitt lymphoma, Down syndrome (DS), Hodgkin's lymphoma, acute lymphoblastic leukemia (ALL), acute myeloid leukemia (AML), acute promyelocytic leukemia (APL), adenoma, breast cancer, cardiac hypertrophy, cervical cancer, cholangiocarcinoma, chronic lymphocytic leukemia (CLL), colorectal cancer, diffuse large B-cell lymphoma (DLBCL), epithelial ovarian cancer (EOC), facioscap…
chr1:214494612-214511374+	1	1	2	1	1	1	chr1	214494611	214511374	+	hsa_circ_1116158	circBase	NM_112393	MDM4	exonic	378
chr1:214494612-214517436+	1	1	1	3	1	1	chr1	214494611	214517436	+		novel	NM_112393	MDM4	exonic	546
chr1:214527769-214563877+	1	1	2	1	1	1	chr1	214527768	214563877	+		novel	uc111hbc.3	MDM4	exonic	1793
chr1:214814185-214815641+	1	1	1	2	1	1	chr1	214814184	214815641	+		novel	NM_116343	CENPF	sense overlapping	1457
chr1:214814298-214815761+	1	1	1	2	1	1	chr1	214814297	214815761	+		novel	NM_116343	CENPF	sense overlapping	1464
chr1:21548241-21554534-	2	1	2	6	3	4	chr1	21548239	21554534	-	hsa_circ_1111127	circBase	NM_111397	ECE1	exonic	466
chr1:215585616-215593119-	8	13	16	3	15	45	chr1	215585615	215593119	-	hsa_circ_1111175	circBase	uc121pid.1	ELK4	exonic	1373	Duchenne muscular dystrophy (DMD), acute lymphoblastic leukemia (ALL), acute myeloid leukemia (AML), breast cancer, cardiac hypertrophy, cholangiocarcinoma, chronic lymphocytic leukemia (CLL), colorectal cancer, facioscapulohumeral muscular dystrophy (FSHD), glioblastoma multiforme (GBM), head and neck squamous cell carcinoma (HNSCC), kidney cancer, limb-girdle muscular dystrophies types 2A (LGMD…
chr1:215585616-215597112-	1	1	7	1	1	8	chr1	215585615	215597112	-	hsa_circ_1111766	circBase	NM_111973	ELK4	sense overlapping	11397
chr1:215588185-215589966-	1	1	2	1	4	2	chr1	215588184	215589966	-		novel	NM_111973	ELK4	exonic	991
chr1:215741611-215742352-	2	1	1	1	4	2	chr1	215741599	215742352	-		novel	ENST11111468887	RAB7L1	intronic	1753
chr1:215749244-215752481+	1	1	2	1	1	1	chr1	215749243	215752481	+	hsa_circ_1111184	circBase	NM_116121	KCTD3	exonic	352
chr1:21586764-21599414-	2	2	1	2	8	1	chr1	21586763	21599414	-	hsa_circ_1111971	circBase	NM_111397	ECE1	exonic	335
chr1:21599192-21616649-	2	1	2	6	3	4	chr1	21599191	21616649	-	hsa_circ_1112412	circBase	NM_111397	ECE1	exonic	442
chr1:216589249-216613572+	1	1	1	4	1	1	chr1	216589248	216613572	+	hsa_circ_1111772	circBase	NM_115326	SRGAP2	exonic	199
chr1:2166711-2182417+	1	1	1	1	3	1	chr1	2166711	2182417	+	hsa_circ_1119365	circBase	NM_112744	PRKCZ	exonic	542
chr1:216766968-216772446-	1	4	1	1	1	1	chr1	216766967	216772446	-	hsa_circ_1116249	circBase	NM_116893	EIF2D	exonic	482
chr1:216769167-216785711-	4	1	1	1	2	1	chr1	216769166	216785711	-		novel	NM_116893	EIF2D	sense overlapping	16644
chr1:216775691-216778899-	1	1	1	2	1	1	chr1	216775689	216778899	-		novel	NM_116893	EIF2D	sense overlapping	3211
chr1:217679249-217684999+	1	1	1	1	1	2	chr1	217679248	217684999	+		novel	NM_111573	CR1	exonic	366
chr1:217931359-217941168+	1	1	2	1	1	1	chr1	217931358	217941168	+		novel	NM_112389	CD46	exonic	849
chr1:217989274-217991759-	1	1	1	1	1	2	chr1	217989273	217991759	-	hsa_circ_1116827	circBase	uc111hgr.2	mir-29b-2	exonic	328
chr1:2186613-2186766+	1	1	1	1	1	7	chr1	2186612	2186766	+		novel	ENST11111378567	PRKCZ	intronic	164
chr1:219366424-219385194+	1	2	1	2	1	1	chr1	219366423	219385194	+	hsa_circ_1111992	circBase	NM_138794	LYPLAL1	sense overlapping	18671
chr1:219366424-219392154+	2	1	1	1	1	11	chr1	219366423	219392154	+	hsa_circ_1114314	circBase	NM_138794	LYPLAL1	sense overlapping	25631
chr1:219366424-219414651+	1	3	4	2	2	5	chr1	219366423	219414651	+	hsa_circ_1114417	circBase	NM_138794	LYPLAL1	sense overlapping	48227
chr1:219366472-219392154+	1	1	1	2	1	1	chr1	219366471	219392154	+	hsa_circ_1111994	circBase	NM_138794	LYPLAL1	sense overlapping	25583
chr1:219383874-219392154+	1	1	1	1	1	2	chr1	219383873	219392154	+	hsa_circ_1111995	circBase	NM_138794	LYPLAL1	sense overlapping	8181
chr1:221178591-221181681-	1	1	3	1	1	1	chr1	221178589	221181681	-	hsa_circ_1116485	circBase	NM_114446	EPRS	exonic	458
chr1:221179448-221181681-	1	2	3	1	1	7	chr1	221179447	221181681	-	hsa_circ_1117739	circBase	NM_114446	EPRS	exonic	345
chr1:22131755-22132681-	2	1	1	4	5	3	chr1	22131754	22132681	-		novel	NM_132236	USP48	exonic	314
chr1:221368425-221375716-	2	1	1	1	1	1	chr1	221368424	221375716	-		novel	uc111hmg.2	RAB3GAP2	exonic	413
chr1:221386229-221387321-	2	1	1	2	4	2	chr1	221386228	221387321	-	hsa_circ_1112924	circBase	NM_112414	RAB3GAP2	exonic	216
chr1:22147529-22148257-	2	4	11	1	1	1	chr1	22147528	22148257	-	hsa_circ_1114818	circBase	NM_132236	USP48	exonic	246
chr1:22147529-22151588-	1	5	2	1	1	1	chr1	22147528	22151588	-		novel	NM_132236	USP48	exonic	444
chr1:22147529-22179612-	3	2	3	11	2	6	chr1	22147528	22179612	-	hsa_circ_1112159	circBase	NM_132236	USP48	exonic	1482
chr1:22173561-22174764-	1	1	1	3	4	2	chr1	22173559	22174764	-	hsa_circ_1111538	circBase	NM_132236	USP48	exonic	217
chr1:22174631-22178118-	2	1	4	3	3	9	chr1	22174631	22178118	-	hsa_circ_1112166	circBase	NM_132236	USP48	exonic	243
chr1:221752696-221754461+	1	1	1	1	1	2	chr1	221752695	221754461	+	hsa_circ_1116519	circBase	NM_118651	MARK1	exonic	258
chr1:221771673-221792197+	1	1	1	1	1	2	chr1	221771672	221792197	+	hsa_circ_1112173	circBase	NM_118651	MARK1	exonic	611
chr1:222794511-222816591+	1	1	1	1	2	1	chr1	222794511	222816591	+		novel	NM_198551	MIA3	exonic	3344
chr1:222889126-222895856+	1	1	2	1	1	1	chr1	222889125	222895856	+	hsa_circ_1112113	circBase	NM_144695	BROX	exonic	417
chr1:222897434-222898897+	4	1	2	2	1	1	chr1	222897433	222898897	+	hsa_circ_1113413	circBase	NM_144695	BROX	exonic	179
chr1:222923931-222924113+	1	1	2	1	1	1	chr1	222923929	222924113	+		novel	NM_217468	FAM177B	sense overlapping	184
chr1:223116149-223116674+	1	3	1	1	1	1	chr1	223116148	223116674	+		PMID:25171511	NM_132891	DISP1	exonic	526
chr1:223981191-223984292-	1	1	1	1	1	2	chr1	223981191	223984292	-		novel	NM_115426	TP53BP2	exonic	1148
chr1:223985917-223987749-	1	1	3	1	1	1	chr1	223985916	223987749	-	hsa_circ_1116559	circBase	NM_115426	TP53BP2	exonic	612
chr1:223991876-223994649-	1	1	3	4	2	1	chr1	223991875	223994649	-	hsa_circ_1113914	circBase	NM_115426	TP53BP2	exonic	277
chr1:22414922-22413359+	11	2	4	8	1	1	chr1	22414921	22413359	+	hsa_circ_1115576	circBase	NM_111791	CDC42	exonic	536
chr1:224194819-224195239-	1	1	1	1	2	1	chr1	224194818	224195239	-		novel	TCONS_l2_11111811	XLOC_l2_111331	intronic	421
chr1:224377279-224378121+	2	1	1	1	1	1	chr1	224377278	224378121	+	hsa_circ_1112127	circBase	NM_113676	DEGS1	exonic	743
chr1:224437914-224455835-	1	1	3	1	1	1	chr1	224437913	224455835	-	hsa_circ_1111188	circBase	NM_112533	NVL	exonic	217
chr1:224454716-224455835-	1	1	2	1	1	1	chr1	224454715	224455835	-		PMID:25171511	ENST11111361463	NVL	intronic	1131
chr1:224553581-224559125+	1	6	3	1	3	1	chr1	224553581	224559125	+	hsa_circ_1111191	circBase	NM_114184	CNIH4	exonic	254	Duchenne muscular dystrophy (DMD), T-cell leukemia, acute lymphoblastic leukemia (ALL), acute myeloid leukemia (AML), asthma, breast cancer, colorectal cancer, dermatomyositis (DM), epithelial ovarian cancer (EOC), glioblastoma, glioma, hepatocellular carcinoma (HCC), limb-girdle muscular dystrophies types 2A (LGMD2A), lung cancer, miyoshi myopathy (MM), nemaline myopathy (NM), non-alcoholic fatt…
chr1:224585799-224586736-	1	1	1	1	4	1	chr1	224585798	224586736	-		novel	NM_125161	WDR26	exonic	355
chr1:224588652-224616118-	1	1	1	1	3	1	chr1	224588651	224616118	-		novel	NM_125161	WDR26	exonic	557
chr1:224599129-224611137-	1	1	1	3	1	1	chr1	224599128	224611137	-	hsa_circ_1115242	circBase	ENST11111366852	WDR26	exonic	222
chr1:225141372-225195246+	3	1	1	1	1	1	chr1	225141371	225195246	+	hsa_circ_1116611	circBase	NM_111373	DNAH14	exonic	1141
chr1:225211317-225211567+	1	1	1	1	3	1	chr1	225211316	225211567	+	hsa_circ_1112181	circBase	NM_111373	DNAH14	exonic	251
chr1:225611156-225613134-	1	1	1	2	1	1	chr1	225611155	225613134	-	hsa_circ_1116651	circBase	NM_112296	LBR	exonic	247
chr1:225921641-225952374-	1	1	2	1	1	1	chr1	225921641	225952374	-		novel	ENST11111428148	RP11-145A3.2	sense overlapping	31734
chr1:226175597-226176189-	1	1	3	1	1	1	chr1	226175596	226176189	-	hsa_circ_1112235	circBase	NM_152618	SDE2	exonic	493
chr1:226453234-226475498-	1	1	1	1	1	3	chr1	226453233	226475498	-	hsa_circ_1112242	circBase	NM_173183	LIN9	exonic	774
chr1:226465476-226475498-	1	1	1	1	1	2	chr1	226465475	226475498	-	hsa_circ_1116719	circBase	NM_173183	LIN9	exonic	418
chr1:227257478-227289632-	1	1	3	1	1	1	chr1	227257477	227289632	-		novel	NM_113617	CDC42BPA	sense overlapping	32155
chr1:227381487-227411921-	1	1	1	2	1	1	chr1	227381486	227411921	-	hsa_circ_1115322	circBase	NM_113617	CDC42BPA	exonic	329
chr1:22816373-22818126+	1	1	1	6	4	2	chr1	22816372	22818126	+	hsa_circ_1117418	circBase	NM_114871	ZBTB41	exonic	911
chr1:229422233-229439747+	5	1	1	1	1	2	chr1	229422232	229439747	+	hsa_circ_1112311	circBase	NM_114578	RAB4A	sense overlapping	17515
chr1:229593918-229611266-	2	1	1	1	1	1	chr1	229593917	229611266	-	hsa_circ_1116794	circBase	NM_118231	NUP133	exonic	781
chr1:229611371-229623361-	1	1	1	1	1	2	chr1	229611371	229623361	-		novel	NM_118231	NUP133	exonic	1357
chr1:229613344-229634153-	1	1	1	1	2	1	chr1	229613343	229634153	-		novel	NM_118231	NUP133	exonic	1118
chr1:229622118-229623361-	1	1	1	2	1	1	chr1	229622117	229623361	-		novel	NM_118231	NUP133	exonic	316
chr1:229625712-229634153-	1	1	1	3	1	1	chr1	229625711	229634153	-	hsa_circ_1112341	circBase	NM_118231	NUP133	exonic	546
chr1:229675213-229678118-	1	1	1	1	1	2	chr1	229675212	229678118	-	hsa_circ_1112347	circBase	NM_112189	ABCB11	exonic	418
chr1:229781616-229791135+	1	1	1	1	1	2	chr1	229781615	229791135	+	hsa_circ_1116842	circBase	NM_114777	URB2	exonic	582
chr1:231181135-231197149-	1	1	1	2	1	1	chr1	231181134	231197149	-	hsa_circ_1111194	circBase	NM_124525	TTC13	exonic	318	Alzheimer's disease, PFV-1 infection, acute lymphoblastic leukemia (ALL), acute myeloid leukemia (AML), cardiac hypertrophy, colorectal cancer, epithelial ovarian cancer (EOC), hepatocellular carcinoma (HCC), lung cancer, malignant melanoma, multiple myeloma (MM), non-alcoholic fatty liver disease (NAFLD), pancreatic cancer, prostate cancer, testicular germ cell tumor, uterine leiomyoma (ULM)
chr1:231191179-231197149-	4	1	15	11	11	8	chr1	231191178	231197149	-	hsa_circ_1111195	circBase	NM_124525	TTC13	exonic	242	acute lymphoblastic leukemia (ALL), acute myeloid leukemia (AML), cardiac hypertrophy, colorectal cancer, lung cancer, non-alcoholic fatty liver disease (NAFLD), prostate cancer
chr1:231313964-231339136+	1	1	1	2	1	1	chr1	231313963	231339136	+	hsa_circ_1111192	circBase	NM_114481	GALNT2	exonic	248
chr1:231416514-231411942+	1	1	2	1	1	1	chr1	231416513	231411942	+	hsa_circ_1116895	circBase	NM_114236	GNPAT	exonic	721
chr1:231511173-231519845-	1	1	1	1	2	1	chr1	231511172	231519845	-	hsa_circ_1112382	circBase	NM_122151	EGLN1	sense overlapping	9773
chr1:231516318-231519845-	1	1	2	2	5	3	chr1	231516317	231519845	-	hsa_circ_1111196	circBase	NM_122151	EGLN1	exonic	257
chr1:231672959-231678357+	1	1	1	6	2	1	chr1	231672958	231678357	+	hsa_circ_1114834	circBase	NM_115999	TSNAX	exonic	246
chr1:231798887-231811333+	1	1	3	5	1	1	chr1	231798886	231811333	+	hsa_circ_1116866	circBase	NM_117357	COG2	exonic	185
chr1:231798887-231817386+	1	2	1	5	1	2	chr1	231798886	231817386	+	hsa_circ_1116867	circBase	NM_117357	COG2	exonic	599
chr1:231954175-231954896+	1	1	1	1	3	1	chr1	231954174	231954896	+	hsa_circ_1112391	circBase	NM_111164546	DISC1	intronic	822
chr1:2324719-2335128+	1	1	2	1	1	1	chr1	2324718	2335128	+		novel	NM_117133	RER1	sense overlapping	11321
chr1:233225817-233231619-	1	1	1	1	1	4	chr1	233225816	233231619	-	hsa_circ_1115994	circBase	NM_114811	PCNXL2	exonic	239
chr1:233296129-233344435-	1	1	1	1	1	2	chr1	233296128	233344435	-	hsa_circ_1116635	circBase	NM_114811	PCNXL2	exonic	826
chr1:233313548-233344435-	5	1	1	1	2	1	chr1	233313547	233344435	-	hsa_circ_1111958	circBase	NM_114811	PCNXL2	exonic	582
chr1:233334685-233344435-	1	1	1	2	2	2	chr1	233334684	233344435	-	hsa_circ_1115223	circBase	NM_114811	PCNXL2	exonic	375
chr1:233334685-233353931-	1	1	2	1	1	1	chr1	233334684	233353931	-	hsa_circ_1116969	circBase	NM_114811	PCNXL2	exonic	562
chr1:233334685-233372726-	1	1	1	1	2	3	chr1	233334684	233372726	-	hsa_circ_1111198	circBase	NM_114811	PCNXL2	exonic	844	Duchenne muscular dystrophy (DMD), acute lymphoblastic leukemia (ALL), autism spectrum disorder (ASD), breast cancer, colorectal cancer, endometrial cancer, epithelial ovarian cancer (EOC), kidney cancer, lung cancer, malignant melanoma, non-alcoholic fatty liver disease (NAFLD), ovarian cancer (OC), testicular germ cell tumor, uveal melanoma
chr1:233344264-233372726-	1	1	1	1	1	5	chr1	233344263	233372726	-	hsa_circ_1116415	circBase	NM_114811	PCNXL2	exonic	641
chr1:233353645-233363117-	1	1	1	1	13	3	chr1	233353644	233363117	-	hsa_circ_1113314	circBase	NM_114811	PCNXL2	exonic	333
chr1:233353645-233372726-	1	1	1	2	1	1	chr1	233353644	233372726	-	hsa_circ_1116979	circBase	NM_114811	PCNXL2	exonic	469
chr1:233482188-233491757+	1	1	1	2	1	1	chr1	233482187	233491757	+	hsa_circ_1112427	circBase	NM_132435	KIAA1814	exonic	516
chr1:233482188-233512273+	1	1	2	1	1	1	chr1	233482187	233512273	+	hsa_circ_1112429	circBase	NM_132435	KIAA1814	exonic	1119
chr1:23356962-23377113+	18	3	2	1	1	1	chr1	23356961	23377113	+	hsa_circ_1119161	circBase	NM_115113	KDM1A	exonic	311
chr1:23356962-23385661+	6	6	4	1	2	2	chr1	23356961	23385661	+	hsa_circ_1117822	circBase	NM_115113	KDM1A	exonic	756
chr1:23397718-23398691+	2	1	2	11	8	4	chr1	23397717	23398691	+	hsa_circ_1111835	circBase	NM_115113	KDM1A	exonic	219
chr1:234569156-234573118-	1	1	1	1	2	1	chr1	234569155	234573118	-		novel	NM_115646	TARBP1	exonic	261
chr1:234582549-234586312-	3	1	1	1	1	1	chr1	234582548	234586312	-	hsa_circ_1112468	circBase	NM_115646	TARBP1	exonic	412
chr1:234586174-234618557-	1	1	1	2	1	3	chr1	234586173	234618557	-	hsa_circ_1112472	circBase	NM_115646	TARBP1	exonic	931
chr1:235386481-235421541-	1	1	1	2	1	1	chr1	235386481	235421541	-		novel	NM_116374	ARID4B	exonic	948
chr1:235392546-235394514-	1	2	1	1	1	1	chr1	235392545	235394514	-	hsa_circ_1117148	circBase	NM_116374	ARID4B	exonic	232
chr1:235498557-235516198+	2	1	1	1	1	1	chr1	235498556	235516198	+	hsa_circ_1112511	circBase	T133448	G117566	exonic	7642
chr1:235515123-235516198+	1	1	2	1	1	1	chr1	235515122	235516198	+	hsa_circ_1112514	circBase	T133448	G117566	exonic	1176
chr1:235612184-235616226+	1	1	1	1	1	2	chr1	235612183	235616226	+	hsa_circ_1112516	circBase	NM_113193	TBCE	exonic	283
chr1:235643371-235659618-	1	1	1	2	1	1	chr1	235643369	235659618	-	hsa_circ_1117173	circBase	NM_111277155	B3GALNT2	exonic	662
chr1:235851249-235861572-	1	1	1	1	2	1	chr1	235851248	235861572	-	hsa_circ_1117178	circBase	NM_111181	LYST	exonic	426
chr1:235856651-235897959-	1	1	1	2	1	1	chr1	235856649	235897959	-		novel	NM_111181	LYST	exonic	2343
chr1:235944165-235945387-	1	1	3	1	1	1	chr1	235944164	235945387	-	hsa_circ_1112538	circBase	NM_111181	LYST	exonic	352
chr1:235952111-235964397-	1	1	1	3	1	1	chr1	235952111	235964397	-	hsa_circ_1112544	circBase	NM_111181	LYST	exonic	976
chr1:235956813-235964397-	4	1	1	1	1	1	chr1	235956812	235964397	-	hsa_circ_1114551	circBase	NM_111181	LYST	exonic	414
chr1:235963621-235964397-	2	1	1	1	4	2	chr1	235963619	235964397	-	hsa_circ_1117192	circBase	NM_111181	LYST	exonic	294
chr1:235993526-235996967-	5	1	1	1	2	2	chr1	235993525	235996967	-	hsa_circ_1115899	circBase	NM_111181	LYST	exonic	289
chr1:236332116-236343328+	1	1	1	1	1	2	chr1	236332115	236343328	+	hsa_circ_1112551	circBase	NM_113272	GPR137B	exonic	423
chr1:236332116-236347216+	1	1	1	1	1	3	chr1	236332115	236347216	+	hsa_circ_1112551	circBase	NM_113272	GPR137B	exonic	552
chr1:236341714-236343328+	1	1	1	1	1	2	chr1	236341713	236343328	+	hsa_circ_1117115	circBase	NM_113272	GPR137B	exonic	373
chr1:236341714-236347216+	1	1	2	1	1	1	chr1	236341713	236347216	+	hsa_circ_1114595	circBase	NM_113272	GPR137B	exonic	512
chr1:236762783-236766562-	1	1	1	1	5	1	chr1	236762782	236766562	-		novel	NM_118172	HEATR1	sense overlapping	3781
chr1:236969444-236979843+	1	3	2	1	1	5	chr1	236969443	236979843	+	hsa_circ_1114139	circBase	NM_111254	MTR	exonic	515
chr1:236969444-236998987+	1	1	1	1	1	2	chr1	236969443	236998987	+		novel	NM_111254	MTR	exonic	1181
chr1:236976138-236995378+	1	1	1	2	1	1	chr1	236976137	236995378	+		novel	NM_111254	MTR	exonic	686
chr1:236987419-236991196+	1	1	1	2	1	2	chr1	236987418	236991196	+	hsa_circ_1117875	circBase	NM_111254	MTR	exonic	231
chr1:236998847-237126854+	1	1	1	2	1	1	chr1	236998846	237126854	+	hsa_circ_1112619	circBase	NM_111254	MTR	exonic	1217
chr1:23965615-23967691+	2	3	1	8	2	5	chr1	23965614	23967691	+		novel	NR_127142	MDS2	sense overlapping	2186
chr1:24141681-24147183-	1	1	1	3	5	2	chr1	24141679	24147183	-	hsa_circ_1113757	circBase	NM_111191	HMGCL	exonic	437
chr1:241669313-241672185-	1	1	1	1	1	2	chr1	241669312	241672185	-	hsa_circ_1112731	circBase	NM_111143	FH	exonic	349
chr1:24171879-24172229-	2	2	1	5	2	2	chr1	24171878	24172229	-		novel	NM_111147	FUCA1	sense overlapping	351
chr1:24298341-24314763-	8	8	6	45	26	13	chr1	24298339	24314763	-		novel	NR_134135	SRSF11	exonic	614
chr1:243299445-243315765-	1	1	1	1	1	3	chr1	243299444	243315765	-		novel	NM_114812	CEP171	exonic	418
chr1:243327586-243349374-	2	1	1	1	1	1	chr1	243327585	243349374	-		novel	NM_114812	CEP171	exonic	2414
chr1:243328537-243328941-	1	1	1	1	2	1	chr1	243328536	243328941	-		novel	NM_114812	CEP171	sense overlapping	415
chr1:243433394-243449699+	1	1	1	1	1	4	chr1	243433393	243449699	+	hsa_circ_1117543	circBase	ENST11111491165	SDCCAG8	exonic	492
chr1:243433394-243471479+	1	2	1	1	1	1	chr1	243433393	243471479	+	hsa_circ_1112747	circBase	NM_116642	SDCCAG8	sense overlapping	38186
chr1:243433417-243471479+	1	1	2	1	1	1	chr1	243433416	243471479	+	hsa_circ_1112752	circBase	NM_116642	SDCCAG8	exonic	862
chr1:243468115-243493994+	1	1	1	1	2	1	chr1	243468114	243493994	+	hsa_circ_1112757	circBase	NM_116642	SDCCAG8	exonic	546
chr1:243493842-243542165+	1	1	1	1	1	2	chr1	243493841	243542165	+		novel	NM_116642	SDCCAG8	exonic	548
chr1:243514341-243542165+	1	1	4	1	1	1	chr1	243514341	243542165	+		novel	NM_116642	SDCCAG8	exonic	395
chr1:243776973-243828185-	1	1	1	3	1	1	chr1	243776972	243828185	-	hsa_circ_1117251	circBase	NM_115465	AKT3	exonic	524
chr1:243776973-243859118-	3	1	1	2	1	1	chr1	243776972	243859118	-	hsa_circ_1117251	circBase	NM_115465	AKT3	exonic	651
chr1:244572114-244581154-	1	4	1	3	5	1	chr1	244572113	244581154	-	hsa_circ_1112817	circBase	NM_111126	ADSS	sense overlapping	9141
chr1:244849899-244855322+	3	1	1	1	1	1	chr1	244849898	244855322	+		novel	NM_116176	DESI2	exonic	319
chr1:24495917-24517344-	1	1	1	5	3	1	chr1	24495916	24517344	-	hsa_circ_1111916	circBase	NM_171743	IFNLR1	exonic	319
chr1:245121911-245122676-	1	1	1	1	2	1	chr1	245121899	245122676	-	hsa_circ_1112825	circBase	NM_114511	HNRNPU	exonic	597
chr1:245165423-245222761+	1	1	1	1	2	1	chr1	245165422	245222761	+	hsa_circ_1112426	circBase	NM_111291327	EFCAB2	exonic	271
chr1:246178832-246193239-	1	1	1	1	2	1	chr1	246178831	246193239	-	hsa_circ_1115191	circBase	NM_122743	SMYD3	exonic	282
chr1:246313781-246313995-	2	1	1	1	1	1	chr1	246313781	246313995	-		novel	ENST11111388985	SMYD3	intronic	215
chr1:246351145-246371761-	1	1	1	1	2	1	chr1	246351144	246371761	-	hsa_circ_1112843	circBase	ENST11111453676	SMYD3	intronic	21717
chr1:246754814-246755243+	3	1	3	3	1	5	chr1	246754813	246755243	+	hsa_circ_1117311	circBase	NM_152619	CNST	exonic	431
chr1:246794661-246795226+	2	1	1	3	6	2	chr1	246794661	246795226	+	hsa_circ_1112858	circBase	NM_152619	CNST	sense overlapping	566
chr1:246811441-246823636+	2	1	1	1	1	1	chr1	246811441	246823636	+	hsa_circ_1112859	circBase	NM_152619	CNST	exonic	1135
chr1:247139339-247141614-	2	1	1	1	1	1	chr1	247139338	247141614	-	hsa_circ_1116197	circBase	NM_115446	AHCTF1	exonic	428
chr1:247148795-247148982-	1	1	1	1	1	5	chr1	247148794	247148982	-		novel	NM_115446	AHCTF1	exonic	188
chr1:247292963-247332871+	1	1	1	2	1	1	chr1	247292962	247332871	+		novel	NM_113431	ZNF124	antisense	39918
chr1:247312111-247323115-	1	1	1	2	1	1	chr1	247312111	247323115	-		novel	NM_113431	ZNF124	sense overlapping	21115
chr1:247312118-247323115-	1	1	1	4	3	1	chr1	247312117	247323115	-	hsa_circ_1112812	circBase	NM_111243741	ZNF124	sense overlapping	21198
chr1:247318868-247323115-	6	4	16	11	16	21	chr1	247318867	247323115	-	hsa_circ_1112922	circBase	NM_111243741	ZNF124	sense overlapping	4248
chr1:247319718-247323115-	4	14	24	24	6	32	chr1	247319717	247323115	-	hsa_circ_1112879	circBase	NM_111243741	ZNF124	sense overlapping	3418
chr1:247321312-247323115-	6	1	2	12	1	3	chr1	247321311	247323115	-	hsa_circ_1115667	circBase	NM_111243741	ZNF124	sense overlapping	2814
chr1:247322318-247323115-	3	1	1	4	2	1	chr1	247322317	247323115	-	hsa_circ_1117348	circBase	NM_111243741	ZNF124	exonic	188
chr1:247362662-247363495-	1	1	1	1	3	1	chr1	247362661	247363495	-		novel	TCONS_l2_11111919	XLOC_l2_111411	exonic	223
chr1:24841814-24841157+	1	5	2	2	1	1	chr1	24841813	24841157	+	hsa_circ_1113553	circBase	NM_113441	RCAN3	exonic	254
chr1:248652891-248653147-	1	1	1	1	1	2	chr1	248652891	248653147	-		novel	ENST11111366473	OR2T5	antisense	157
chr1:24979414-24981614+	2	13	7	4	4	21	chr1	24979413	24981614	+	hsa_circ_1111916	circBase	NM_111313448	SRRM1	exonic	389
chr1:24989151-24989715+	1	1	1	3	1	4	chr1	24989151	24989715	+	hsa_circ_1111921	circBase	NM_111313448	SRRM1	exonic	187
chr1:24989151-24996816+	1	3	1	8	2	2	chr1	24989151	24996816	+		novel	NM_115839	SRRM1	exonic	917
chr1:24993316-24996816+	3	12	3	2	4	3	chr1	24993315	24996816	+		novel	NM_115839	SRRM1	exonic	772
chr1:25553933-25554726-	8	6	1	2	5	3	chr1	25553932	25554726	-	hsa_circ_1112897	circBase	NM_115484	SYF2	exonic	219
chr1:25666965-25669564+	11	6	3	2	2	1	chr1	25666964	25669564	+	hsa_circ_1111132	circBase	NM_114313	TMEM51A	exonic	219
chr1:25666965-25678184+	1	1	1	14	11	11	chr1	25666964	25678184	+	hsa_circ_1117154	circBase	NM_114313	TMEM51A	exonic	287
chr1:25678117-25683344+	2	4	4	2	12	5	chr1	25678116	25683344	+	hsa_circ_1111932	circBase	NM_114313	TMEM51A	exonic	222
chr1:26314722-26317354-	1	2	1	2	7	1	chr1	26314721	26317354	-		novel	NM_111437	PAFAH2	exonic	388
chr1:26566253-26586293+	2	3	2	8	8	4	chr1	26566252	26586293	+	hsa_circ_1111972	circBase	NM_111281517	CEP85	exonic	1211
chr1:26584188-26586293+	2	2	8	2	2	2	chr1	26584187	26586293	+	hsa_circ_1111133	circBase	NM_111281517	CEP85	exonic	438	Alzheimer's disease, B-cell lymphoma, Hodgkin's lymphoma, T-cell leukemia, autism spectrum disorder (ASD), breast cancer, chronic lymphocytic leukemia (CLL), chronic myeloid leukemia (CML), colorectal cancer, diffuse large B-cell lymphoma (DLBCL), follicular lymphoma (FL), gastric cancer (stomach cancer), glioma, hepatocellular carcinoma (HCC), kidney cancer, lung cancer, malignant lymphoma, mali…
chr1:27156142-27159283+	1	2	1	2	1	5	chr1	27156141	27159283	+	hsa_circ_1118494	circBase	NM_116115	ARID1A	exonic	783
chr1:27269151-27269556+	2	1	1	5	5	1	chr1	27269151	27269556	+	hsa_circ_1115187	circBase	NM_116611	NUDC	exonic	312
chr1:27436118-27441777-	3	3	2	7	7	9	chr1	27436117	27441777	-		novel	NM_113147	SLC9A1	exonic	712
chr1:27441317-27441777-	2	1	2	2	9	2	chr1	27441316	27441777	-	hsa_circ_1112381	circBase	NM_113147	SLC9A1	exonic	461
chr1:27884117-27884278-	2	1	3	4	5	2	chr1	27884116	27884278	-		novel	ENST11111247187	AHDC1	intronic	172
chr1:28116173-28121143+	5	4	4	1	1	1	chr1	28116172	28121143	+	hsa_circ_1118126	circBase	NM_177424	STX12	exonic	171
chr1:28337458-28343751-	2	1	16	1	1	1	chr1	28337457	28343751	-	hsa_circ_1111115	circBase	NM_111991	EYA3	exonic	411
chr1:28422441-28422819-	5	3	2	5	8	14	chr1	28422439	28422819	-		novel	ENST11111436161	SPCS2P4	sense overlapping	381
chr1:28785596-28793146+	8	2	4	2	1	2	chr1	28785595	28793146	+	hsa_circ_1115416	circBase	NM_123923	PHACTR4	sense overlapping	7451
chr1:28785596-28817116+	6	5	2	1	1	1	chr1	28785595	28817116	+		novel	NM_123923	PHACTR4	exonic	1744
chr1:28811166-28811663+	11	15	8	16	11	14	chr1	28811165	28811663	+	hsa_circ_1112919	circBase	NM_123923	PHACTR4	exonic	598
chr1:28812624-28817116+	8	4	4	1	1	1	chr1	28812623	28817116	+	hsa_circ_1112971	circBase	NM_123923	PHACTR4	sense overlapping	4493
chr1:28887145-28887911+	5	2	2	1	1	1	chr1	28887144	28887911	+	hsa_circ_1111153	circBase	NM_117846	TRNAU1AP	exonic	153
chr1:28939759-28948677-	1	1	5	11	2	2	chr1	28939758	28948677	-	hsa_circ_1111161	circBase	NM_115644	TAF12	exonic	445
chr1:29111195-29116698+	3	2	1	5	9	4	chr1	29111194	29116698	+		novel	NM_116582	GMEB1	exonic	271
chr1:29111195-29123596+	1	2	1	3	5	5	chr1	29111194	29123596	+	hsa_circ_1111163	circBase	NM_116582	GMEB1	exonic	658
chr1:29313943-29314417+	2	1	2	2	7	2	chr1	29313942	29314417	+	hsa_circ_1111167	circBase	NM_213342	EPB41	exonic	475
chr1:29313943-29323831+	11	2	2	8	1	16	chr1	29313942	29323831	+	hsa_circ_1111168	circBase	NM_213342	EPB41	exonic	873
chr1:29359615-29379824+	2	1	1	8	8	5	chr1	29359614	29379824	+		novel	NM_114437	EPB41	exonic	633
chr1:29362338-29365938+	1	2	2	21	34	21	chr1	29362337	29365938	+	hsa_circ_1111142	circBase	NM_114437	EPB41	exonic	271
chr1:29362338-29379824+	3	1	1	1	12	2	chr1	29362337	29379824	+	hsa_circ_1111173	circBase	NM_114437	EPB41	exonic	481
chr1:29481218-29481422-	1	2	3	16	11	8	chr1	29481217	29481422	-	hsa_circ_1116612	circBase	NM_115626	SRSF4	exonic	215
chr1:31211451-31214563-	5	3	5	2	1	1	chr1	31211451	31214563	-		novel	NM_116762	LAPTM5	exonic	425
chr1:31215677-31215878-	2	2	2	2	3	8	chr1	31215676	31215878	-		novel	NM_116762	LAPTM5	sense overlapping	212
chr1:31437521-31454252-	1	2	1	2	5	2	chr1	31437521	31454252	-	hsa_circ_1111241	circBase	NM_114676	PUM1	exonic	1165
chr1:31452919-31468167-	3	10	1	13	9	24	chr1	31452918	31468167	-	hsa_circ_1112452	circBase	NM_114676	PUM1	exonic	634
chr1:31465237-31468167-	3	11	1	13	4	4	chr1	31465236	31468167	-	hsa_circ_1111143	circBase	NM_114676	PUM1	exonic	438	acute lymphoblastic leukemia (ALL), acute myeloid leukemia (AML), bladder cancer, breast cancer, cardiac hypertrophy, cervical cancer, chronic lymphocytic leukemia (CLL), colorectal cancer, epithelial ovarian cancer (EOC), glioblastoma, hepatocellular carcinoma (HCC), kidney cancer, lung cancer, malignant melanoma, neuroblastoma (NB), pancreatic cancer, prostate cancer, retinitis pigmentosa (RP),…
chr1:31465237-31479949-	2	1	1	4	5	3	chr1	31465236	31479949	-	hsa_circ_1111144	circBase	NM_114676	PUM1	exonic	726	Alzheimer's disease, B-cell chronic lymphocytic leukemia, Duchenne muscular dystrophy (DMD), acute lymphoblastic leukemia (ALL), acute myeloid leukemia (AML), bladder cancer, breast cancer, cardiac hypertrophy, cervical cancer, chronic lymphocytic leukemia (CLL), colorectal cancer, epithelial ovarian cancer (EOC), glioblastoma, glioblastoma multiforme (GBM), head and neck squamous cell carcinoma …
chr1:31532151-31532424-	2	4	11	1	1	1	chr1	31532151	31532424	-	hsa_circ_1111145	circBase	NM_114676	PUM1	exonic	374
chr1:31811122-31811895+	1	5	2	1	1	1	chr1	31811121	31811895	+	hsa_circ_1119157	circBase	NM_116515	ZCCHC17	exonic	193
chr1:31811122-31821821+	3	2	3	11	2	6	chr1	31811121	31821821	+	hsa_circ_1117249	circBase	NM_116515	ZCCHC17	exonic	441
chr1:32381496-32385259-	1	1	1	3	4	2	chr1	32381495	32385259	-	hsa_circ_1117364	circBase	NM_181391	PTP4A2	exonic	782
chr1:32495899-32498935+	1	1	2	31	11	11	chr1	32495898	32498935	+	hsa_circ_1117777	circBase	NM_116559	KHDRBS1	exonic	389
chr1:32495899-32514221+	1	4	4	1	1	1	chr1	32495898	32514221	+	hsa_circ_1113446	circBase	NM_116559	KHDRBS1	exonic	793
chr1:32653555-32655851+	2	2	6	1	1	1	chr1	32653554	32655851	+	hsa_circ_1113238	circBase	NM_175852	TXLNA	exonic	366
chr1:32745272-32745811+	1	2	1	6	2	3	chr1	32745271	32745811	+	hsa_circ_1111399	circBase	NM_111142771	LCK	exonic	363
chr1:33133826-33138512+	1	5	2	1	1	1	chr1	33133825	33138512	+	hsa_circ_1118672	circBase	NM_115611	RBBP4	exonic	912
chr1:33133826-33146215+	3	2	3	11	2	6	chr1	33133825	33146215	+		novel	NM_115611	RBBP4	sense overlapping	12391
chr1:33193119-33111393-	5	8	8	3	2	2	chr1	33193118	33111393	-	hsa_circ_1111424	circBase	NM_178547	ZBTB8OS	exonic	321
chr1:33197428-33111393-	2	1	1	4	5	3	chr1	33197427	33111393	-	hsa_circ_1113164	circBase	NM_178547	ZBTB8OS	exonic	283
chr1:33197428-33199673-	2	1	1	4	5	3	chr1	33197427	33199673	-		novel	NM_178547	ZBTB8OS	exonic	258
chr1:33197428-33199711-	2	2	1	3	6	3	chr1	33197427	33199711	-	hsa_circ_1113163	circBase	NM_111318138	ZBTB8OS	exonic	2284
chr1:33199246-33111393-	2	4	11	1	1	1	chr1	33199245	33111393	-	hsa_circ_1117516	circBase	NM_178547	ZBTB8OS	exonic	231
chr1:33413823-33415375-	1	1	1	3	4	2	chr1	33413822	33415375	-	hsa_circ_1111148	circBase	NM_153341	RNF19B	exonic	351	Alzheimer's disease, Burkitt lymphoma, Down syndrome (DS), Hodgkin's lymphoma, acute lymphoblastic leukemia (ALL), acute myeloid leukemia (AML), acute promyelocytic leukemia (APL), adenoma, breast cancer, cardiac hypertrophy, cervical cancer, cholangiocarcinoma, chronic lymphocytic leukemia (CLL), colorectal cancer, diffuse large B-cell lymphoma (DLBCL), epithelial ovarian cancer (EOC), facioscap…
chr1:33478818-33481195-	3	2	3	6	5	12	chr1	33478817	33481195	-	hsa_circ_1111462	circBase	NM_113411	AK2	exonic	269
chr1:33761538-33761916+	2	7	2	1	4	1	chr1	33761537	33761916	+	hsa_circ_1119127	circBase	NM_152493	ZNF362	exonic	238
chr1:35457835-35481763-	1	1	1	13	6	6	chr1	35457834	35481763	-	hsa_circ_1113131	circBase	NM_117167	ZMYM6	exonic	1718
chr1:35471733-35474525-	2	2	2	12	11	6	chr1	35471732	35474525	-	hsa_circ_1113132	circBase	NM_117167	ZMYM6	exonic	462
chr1:35479913-35481763-	11	6	8	2	2	3	chr1	35479912	35481763	-		novel	NM_117167	ZMYM6	sense overlapping	851
chr1:35569896-35576148+	2	5	1	1	1	2	chr1	35569895	35576148	+	hsa_circ_1113731	circBase	NM_124772	ZMYM1	exonic	542
chr1:35824526-35827391+	7	1	6	1	2	1	chr1	35824525	35827391	+	hsa_circ_1111536	circBase	NM_115195	ZMYM4	exonic	755
chr1:35846861-35854683+	5	3	2	1	1	1	chr1	35846859	35854683	+	hsa_circ_1111151	circBase	NM_115195	ZMYM4	exonic	1255	Cerebellar neurodegeneration, Duchenne muscular dystrophy (DMD), Glomerulosclerosis, Hodgkin's lymphoma, acute lymphoblastic leukemia (ALL), acute myeloid leukemia (AML), anaplastic thyroid carcinoma (ATC), bladder cancer, cardiac hypertrophy, cervical cancer, chronic lymphocytic leukemia (CLL), colorectal cancer, glioblastoma, head and neck squamous cell carcinoma (HNSCC), hepatocellular carcino…
chr1:35846861-35855699+	3	3	3	18	31	18	chr1	35846859	35855699	+	hsa_circ_1111542	circBase	NM_115195	ZMYM4	exonic	1416
chr1:35846861-35873761+	2	1	3	22	21	15	chr1	35846859	35873761	+	hsa_circ_1111547	circBase	NM_115195	ZMYM4	exonic	2767
chr1:35846861-35881315+	3	8	2	2	2	2	chr1	35846859	35881315	+	hsa_circ_1111548	circBase	NM_115195	ZMYM4	exonic	3128
chr1:35879573-35881315+	2	2	8	1	1	3	chr1	35879572	35881315	+	hsa_circ_1114719	circBase	NM_115195	ZMYM4	exonic	361
chr1:35925916-35936561-	12	14	7	29	25	75	chr1	35925915	35936561	-	hsa_circ_1111568	circBase	NM_124874	KIAA1319L	exonic	412
chr1:35936464-35944813-	5	7	8	2	1	1	chr1	35936463	35944813	-	hsa_circ_1111571	circBase	NM_124874	KIAA1319L	exonic	447
chr1:35941416-35944813-	5	1	2	1	1	1	chr1	35941415	35944813	-	hsa_circ_1111572	circBase	NM_124874	KIAA1319L	exonic	349
chr1:36213518-36219537-	11	5	2	4	1	2	chr1	36213517	36219537	-		novel	NM_122111	CLSPN	exonic	1148
chr1:36215168-36217117-	18	11	12	5	11	24	chr1	36215167	36217117	-		novel	NM_122111	CLSPN	exonic	511
chr1:36387239-36387461+	2	2	1	4	5	8	chr1	36387238	36387461	+		novel	NM_112199	AGO1	sense overlapping	222
chr1:36437625-36439112+	3	1	2	7	7	2	chr1	36437624	36439112	+	hsa_circ_1111631	circBase	NM_124852	AGO3	exonic	346
chr1:36469942-36492899+	1	1	2	11	11	26	chr1	36469941	36492899	+	hsa_circ_1111637	circBase	NM_124852	AGO3	exonic	933
chr1:36475176-36492899+	11	11	13	8	8	6	chr1	36475175	36492899	+	hsa_circ_1111644	circBase	NM_124852	AGO3	exonic	562
chr1:36499775-36519149+	3	5	3	11	8	8	chr1	36499774	36519149	+	hsa_circ_1111651	circBase	NM_124852	AGO3	exonic	683
chr1:36636572-36639179+	1	5	2	1	2	1	chr1	36636571	36639179	+	hsa_circ_1114193	circBase	NM_111286365	MAP7D1	exonic	693
chr1:36725159-36748187+	3	2	2	8	8	5	chr1	36725158	36748187	+		novel	NM_115119	THRAP3	sense overlapping	23129
chr1:38329984-38334286-	11	6	3	23	11	12	chr1	38329983	38334286	-	hsa_circ_1111725	circBase	NM_115541	INPP5B	exonic	439
chr1:39512718-39513659+	5	3	1	1	1	1	chr1	39512717	39513659	+	hsa_circ_1113262	circBase	T118498	G111817	antisense	952
chr1:39796875-39816625+	1	5	2	1	1	2	chr1	39796874	39816625	+		novel	ENST11111372915	MACF1	exonic	5967
chr1:39826465-39833986+	2	2	4	1	6	12	chr1	39826464	39833986	+	hsa_circ_1113294	circBase	NM_112191	MACF1	exonic	694
chr1:39914946-39915172+	5	4	5	5	8	11	chr1	39914945	39915172	+	hsa_circ_1111843	circBase	NM_112191	MACF1	exonic	227
chr1:41188348-41188946+	2	2	3	5	8	4	chr1	41188347	41188946	+		novel	ENST11111372651	NFYC	intronic	599
chr1:41214518-41218918+	12	16	15	76	55	26	chr1	41214517	41218918	+		novel	NM_114223	NFYC	exonic	395
chr1:41222783-41222972+	3	3	3	6	6	7	chr1	41222782	41222972	+		novel	ENST11111318733	NFYC	intronic	191
chr1:41313221-41323189-	6	6	11	2	1	1	chr1	41313219	41323189	-	hsa_circ_1111863	circBase	NM_117646	TRIT1	exonic	754
chr1:41319642-41323189-	18	14	6	1	1	1	chr1	41319641	41323189	-	hsa_circ_1111157	circBase	NM_117646	TRIT1	exonic	241
chr1:41463166-41466789+	2	6	2	1	1	1	chr1	41463165	41466789	+	hsa_circ_1111929	circBase	NR_125441	CTPS1	exonic	222
chr1:41474466-41475261+	11	2	3	13	5	2	chr1	41474465	41475261	+	hsa_circ_1115157	circBase	NM_111311237	CTPS1	exonic	242
chr1:41474466-41475926+	1	5	2	1	1	1	chr1	41474465	41475926	+	hsa_circ_1118296	circBase	NM_111311237	CTPS1	exonic	336
chr1:41493829-41494398-	1	2	2	8	11	8	chr1	41493828	41494398	-	hsa_circ_1113357	circBase	ENST11111472137	SCMH1	exonic	316
chr1:41529899-41531231+	1	2	3	6	4	3	chr1	41529898	41531231	+	hsa_circ_1119142	circBase	NM_116367	CAP1	exonic	231
chr1:41536267-41541123-	2	8	3	2	1	1	chr1	41536266	41541123	-	hsa_circ_1111161	circBase	NM_112236	SCMH1	exonic	361	Cerebellar neurodegeneration, acute lymphoblastic leukemia (ALL), acute myeloid leukemia (AML), asthma, bladder cancer, breast cancer, cardiac hypertrophy, cervical cancer, chronic lymphocytic leukemia (CLL), epithelial ovarian cancer (EOC), esophageal cancer, glioblastoma, hepatocellular carcinoma (HCC), malignant melanoma, neuroblastoma (NB), non-alcoholic fatty liver disease (NAFLD), pancreati…
chr1:41654727-41668286+	1	1	1	11	13	8	chr1	41654726	41668286	+	hsa_circ_1116373	circBase	NM_112421	RLF	exonic	573
chr1:41656444-41668286+	4	8	8	2	5	1	chr1	41656443	41668286	+	hsa_circ_1117312	circBase	NM_112421	RLF	exonic	418
chr1:41847965-41848251+	2	1	1	8	6	11	chr1	41847964	41848251	+		novel	ENST11111372718	SMAP2	intronic	287
chr1:41878688-41887786+	12	7	6	4	3	1	chr1	41878687	41887786	+		novel	NM_122733	SMAP2	sense overlapping	9199
chr1:41981187-41981591+	1	4	1	11	8	8	chr1	41981186	41981591	+	hsa_circ_1113347	circBase	NM_122774	EXO5	sense overlapping	1414
chr1:42141215-42151989-	12	27	32	11	8	3	chr1	42141214	42151989	-	hsa_circ_1111951	circBase	NM_124513	HIVEP3	exonic	5728
chr1:42194421-42194618-	11	1	4	2	4	2	chr1	42194419	42194618	-	hsa_circ_1111951	circBase	NM_124513	HIVEP3	exonic	199
chr1:42731786-42744343-	2	1	1	5	3	5	chr1	42731785	42744343	-	hsa_circ_1116848	circBase	NM_114947	FOXJ3	exonic	411
chr1:42731786-42744455-	2	1	1	6	8	11	chr1	42731785	42744455	-	hsa_circ_1113379	circBase	NM_114947	FOXJ3	sense overlapping	13671
chr1:42776721-42789498-	4	6	3	12	11	14	chr1	42776721	42789498	-		novel	NM_111198851	FOXJ3	exonic	315
chr1:42946132-42964587+	3	1	2	2	11	2	chr1	42946131	42964587	+	hsa_circ_1113387	circBase	ENST11111428554	CCDC31	exonic	547
chr1:43239212-43241151+	3	7	3	2	1	2	chr1	43239211	43241151	+	hsa_circ_1113399	circBase	NM_124197	C1orf51	sense overlapping	1939
chr1:43239234-43241151+	2	2	1	11	5	8	chr1	43239233	43241151	+	hsa_circ_1114752	circBase	NM_124197	C1orf51	sense overlapping	1917
chr1:43239234-43241193+	5	4	4	11	5	5	chr1	43239233	43241193	+	hsa_circ_1113411	circBase	NM_124197	C1orf51	sense overlapping	1961
chr1:44713611-44785416-	25	11	5	33	8	11	chr1	44713611	44785416	-		PMID:25242744	NM_124166	ERI3	exonic	442
chr1:44713611-44814994-	3	2	2	8	11	4	chr1	44713611	44814994	-	hsa_circ_1112138	circBase	NM_124166	ERI3	exonic	721
chr1:44751517-44785416-	5	2	1	1	1	1	chr1	44751516	44785416	-	hsa_circ_1115716	circBase	NM_124166	ERI3	exonic	342
chr1:44773982-44785416-	5	5	2	11	6	4	chr1	44773981	44785416	-	hsa_circ_1112144	circBase	NM_124166	ERI3	exonic	269
chr1:44773982-44814994-	2	2	3	4	11	3	chr1	44773981	44814994	-	hsa_circ_1117693	circBase	NM_124166	ERI3	exonic	547
chr1:44785311-44814994-	3	11	11	11	18	18	chr1	44785299	44814994	-	hsa_circ_1115246	circBase	NM_124166	ERI3	exonic	395
chr1:44814717-44814994-	1	1	1	1	6	4	chr1	44814716	44814994	-	hsa_circ_1112151	circBase	NM_124166	ERI3	exonic	278
chr1:44877653-44878394+	8	2	2	11	4	2	chr1	44877652	44878394	+	hsa_circ_1112152	circBase	NM_118151	RNF221	exonic	742
chr1:45223228-45223812+	1	1	1	8	4	3	chr1	45223227	45223812	+	hsa_circ_1112563	circBase	NM_116845	KIF2C	exonic	247
chr1:45887397-45954276-	12	4	11	28	2	12	chr1	45887396	45954276	-		novel	NM_117171	TESK2	sense overlapping	66881
chr1:46115882-46118171-	1	4	1	7	2	2	chr1	46115881	46118171	-	hsa_circ_1118774	circBase	NM_121639	GPBP1L1	exonic	267
chr1:46124711-46126897-	3	2	2	6	8	11	chr1	46124699	46126897	-	hsa_circ_1111168	circBase	NM_121639	GPBP1L1	exonic	1157	B-cell chronic lymphocytic leukemia, Hodgkin's lymphoma, Intrahepatic cholangiocarcinoma (ICC), acute lymphoblastic leukemia (ALL), acute myeloid leukemia (AML), acute promyelocytic leukemia (APL), adrenocortical carcinoma, autism spectrum disorder (ASD), bladder cancer, breast cancer, cardiac hypertrophy, chronic lymphocytic leukemia (CLL), chronic pancreatitis, colorectal cancer, gastric cancer…
chr1:46132241-46132692+	3	11	5	3	3	2	chr1	46132241	46132692	+	hsa_circ_1111167	circBase	NM_116166	AKR1A1	exonic	272
chr1:46167927-46171688+	1	1	1	17	11	8	chr1	46167926	46171688	+	hsa_circ_1113454	circBase	NM_112482	NASP	exonic	192
chr1:46199161-46118171-	1	5	2	1	1	1	chr1	46199161	46118171	-	hsa_circ_1115361	circBase	NM_121639	GPBP1L1	exonic	567
chr1:46775569-46775988+	4	4	6	11	11	8	chr1	46775568	46775988	+		PMID:25242744	NM_111297565	UQCRH	exonic	311
chr1:47173979-47175158-	1	9	3	1	3	1	chr1	47173978	47175158	-		novel	ENST11111531769	MKNK1	intronic	1181
chr1:47737748-47761521-	2	2	1	9	9	13	chr1	47737747	47761521	-	hsa_circ_1112371	circBase	NM_113135	STIL	exonic	1682
chr1:47745913-47748131-	2	5	1	3	9	2	chr1	47745912	47748131	-	hsa_circ_1111169	circBase	NM_113135	STIL	exonic	1184
chr1:47753223-47759216-	1	2	2	18	6	7	chr1	47753222	47759216	-		novel	NM_113135	STIL	exonic	348
chr1:47834141-47841965+	1	2	1	5	5	3	chr1	47834141	47841965	+	hsa_circ_1118211	circBase	NM_116318	CMPK1	exonic	474
chr1:48821342-48869554-	4	8	8	3	1	3	chr1	48821341	48869554	-	hsa_circ_1112386	circBase	NM_119173	SPATA6	exonic	789
chr1:51111141-51151483-	1	1	1	6	2	5	chr1	51111141	51151483	-	hsa_circ_1112396	circBase	NM_117151	FAF1	exonic	654
chr1:51111141-51161888-	1	1	1	2	5	2	chr1	51111141	51161888	-	hsa_circ_1112397	circBase	NM_117151	FAF1	exonic	751
chr1:51115264-51161888-	4	2	1	11	2	7	chr1	51115263	51161888	-	hsa_circ_1112411	circBase	NM_117151	FAF1	exonic	661
chr1:51132749-51161888-	7	2	1	2	1	1	chr1	51132748	51161888	-	hsa_circ_1118197	circBase	NM_117151	FAF1	exonic	524
chr1:51253672-51267349-	1	1	1	11	11	7	chr1	51253671	51267349	-	hsa_circ_1115191	circBase	NM_117151	FAF1	exonic	253
chr1:51829538-51831711-	2	5	6	3	3	12	chr1	51829537	51831711	-	hsa_circ_1112417	circBase	NM_111981	EPS15	exonic	241
chr1:51831625-51864837-	15	8	8	1	3	1	chr1	51831624	51864837	-	hsa_circ_1112418	circBase	NM_111981	EPS15	exonic	278
chr1:51861153-51912777-	16	11	3	31	5	5	chr1	51861152	51912777	-	hsa_circ_1113528	circBase	NM_111981	EPS15	exonic	1468
chr1:51861153-51913817-	1	1	1	1	6	7	chr1	51861152	51913817	-	hsa_circ_1112425	circBase	NM_111981	EPS15	exonic	1558
chr1:51868117-51871781-	3	3	2	18	11	8	chr1	51868116	51871781	-	hsa_circ_1114511	circBase	NM_111981	EPS15	exonic	419
chr1:51868117-51874114-	2	1	1	1	7	2	chr1	51868116	51874114	-	hsa_circ_1115567	circBase	NM_111981	EPS15	exonic	617
chr1:51869191-51874114-	2	2	2	1	11	3	chr1	51869191	51874114	-	hsa_circ_1112441	circBase	NM_111981	EPS15	exonic	516
chr1:51871577-51874114-	4	9	4	2	4	1	chr1	51871576	51874114	-	hsa_circ_1114877	circBase	NM_111981	EPS15	exonic	412
chr1:51887458-51913817-	4	8	2	1	3	2	chr1	51887457	51913817	-	hsa_circ_1112444	circBase	NM_111981	EPS15	exonic	552
chr1:51916119-51911717-	8	5	2	4	1	3	chr1	51916118	51911717	-		novel	NM_111981	EPS15	exonic	243
chr1:51916119-51913817-	1	1	1	3	1	4	chr1	51916118	51913817	-	hsa_circ_1116125	circBase	NM_111981	EPS15	exonic	479
chr1:51926763-51931998-	5	5	8	4	2	2	chr1	51926762	51931998	-	hsa_circ_1117331	circBase	NM_111981	EPS15	exonic	252
chr1:52214141-52231653+	2	6	2	1	3	1	chr1	52214141	52231653	+		novel	NM_124586	OSBPL9	exonic	476
chr1:52214141-52237854+	15	2	6	6	6	8	chr1	52214141	52237854	+	hsa_circ_1113536	circBase	NM_124586	OSBPL9	exonic	589
chr1:52279717-52299729-	2	2	11	1	3	1	chr1	52279716	52299729	-		novel	NM_112525	NRD1	sense overlapping	21123
chr1:52285472-52289458-	16	19	2	1	1	1	chr1	52285471	52289458	-	hsa_circ_1112475	circBase	NM_112525	NRD1	exonic	255
chr1:52293468-52299842-	3	11	11	2	4	1	chr1	52293467	52299842	-	hsa_circ_1119176	circBase	NM_112525	NRD1	exonic	228
chr1:52311813-52316186-	4	6	3	1	2	1	chr1	52311812	52316186	-		novel	NM_112525	NRD1	exonic	575
chr1:52887666-52911137-	11	8	5	6	21	5	chr1	52887665	52911137	-		novel	NM_115269	ZCCHC11	sense overlapping	13472
chr1:52947195-52975384-	1	1	2	17	15	18	chr1	52947194	52975384	-	hsa_circ_1113594	circBase	NM_115269	ZCCHC11	exonic	966
chr1:52954581-52975384-	2	3	3	7	6	12	chr1	52954581	52975384	-	hsa_circ_1113596	circBase	NM_115269	ZCCHC11	exonic	633
chr1:52956414-52975384-	3	5	3	11	11	8	chr1	52956413	52975384	-	hsa_circ_1113599	circBase	NM_115269	ZCCHC11	exonic	516
chr1:52959283-52975384-	12	11	9	1	1	1	chr1	52959282	52975384	-	hsa_circ_1113632	circBase	NM_115269	ZCCHC11	exonic	436
chr1:52961199-52975384-	1	1	1	21	11	18	chr1	52961198	52975384	-	hsa_circ_1113612	circBase	NM_115269	ZCCHC11	exonic	384
chr1:52975268-52992145-	14	3	7	4	2	3	chr1	52975267	52992145	-	hsa_circ_1113615	circBase	NM_115269	ZCCHC11	exonic	1192
chr1:52981563-52992145-	4	4	11	2	4	1	chr1	52981562	52992145	-	hsa_circ_1112553	circBase	NM_115269	ZCCHC11	exonic	975
chr1:53133171-53134431+	4	3	2	8	8	5	chr1	53133171	53134431	+		novel	uc111cug.1	FAM159A	sense overlapping	1361
chr1:53321137-53333449+	1	1	1	14	3	4	chr1	53321136	53333449	+		novel	NM_111114339	ZYG11A	exonic	1452
chr1:53343354-53352725+	4	1	2	4	4	9	chr1	53343353	53352725	+	hsa_circ_1112581	circBase	NM_111114339	ZYG11A	exonic	562
chr1:53343354-53358647+	4	8	9	1	1	1	chr1	53343353	53358647	+	hsa_circ_1116685	circBase	NM_111114339	ZYG11A	sense overlapping	15294
chr1:53443889-53453818+	2	2	3	5	4	6	chr1	53443888	53453818	+	hsa_circ_1112585	circBase	NM_112979	SCP2	exonic	417
chr1:53459175-53459374-	3	1	1	5	6	2	chr1	53459174	53459374	-	hsa_circ_1116916	circBase	ENST11111414168	RP11-334A14.2	sense overlapping	311
chr1:54266366-54298264-	1	1	3	21	44	15	chr1	54266365	54298264	-	hsa_circ_1119171	circBase	NM_118187	NDC1	exonic	1144
chr1:54284644-54293846-	3	3	2	12	12	11	chr1	54284643	54293846	-		novel	NM_118187	NDC1	exonic	423
chr1:54348616-54348949-	1	2	5	12	15	17	chr1	54348615	54348949	-	hsa_circ_1117174	circBase	ENST11111465897	YIPF1	exonic	253
chr1:54516429-54519198-	1	3	2	5	3	4	chr1	54516428	54519198	-	hsa_circ_1112634	circBase	NM_111315143	TMEM59	exonic	2771
chr1:55575858-55577493-	1	5	2	2	1	1	chr1	55575857	55577493	-		novel	NM_115316	USP24	sense overlapping	1636
chr1:55637229-55643815-	6	5	7	5	5	12	chr1	55637228	55643815	-		novel	NM_115316	USP24	exonic	511
chr1:55662254-55662464-	2	8	1	12	4	2	chr1	55662253	55662464	-		novel	ENST11111294383	USP24	intronic	211
chr1:58971732-58996361-	1	1	1	21	8	15	chr1	58971731	58996361	-		novel	NM_145243	OMA1	sense overlapping	24631
chr1:58971732-58996411-	11	5	8	1	1	2	chr1	58971731	58996411	-	hsa_circ_1113716	circBase	NM_145243	OMA1	exonic	354
chr1:58971732-59111113-	1	1	12	2	2	1	chr1	58971731	59111113	-	hsa_circ_1116281	circBase	NM_145243	OMA1	exonic	636
chr1:58971732-59112413-	2	6	2	2	1	1	chr1	58971731	59112413	-	hsa_circ_1111172	circBase	NM_145243	OMA1	exonic	865	Alzheimer's disease, Duchenne muscular dystrophy (DMD), PFV-1 infection, acute myeloid leukemia (AML), autism spectrum disorder (ASD), breast cancer, colorectal cancer, epithelial ovarian cancer (EOC), esophageal cancer, head and neck squamous cell carcinoma (HNSCC), hepatocellular carcinoma (HCC), lung cancer, malignant melanoma, multiple myeloma (MM), non-small cell lung cancer (NSCLC), ovarian…
chr1:58971732-59114982-	2	2	2	5	1	8	chr1	58971731	59114982	-	hsa_circ_1112316	circBase	NM_145243	OMA1	exonic	1381
chr1:58992933-59114982-	3	2	4	16	11	12	chr1	58992932	59114982	-	hsa_circ_1112721	circBase	NM_145243	OMA1	exonic	1231
chr1:59147457-59148217-	3	1	7	6	4	15	chr1	59147456	59148217	-	hsa_circ_1112741	circBase	NM_111185487	MYSM1	exonic	761
chr1:59151825-59161879-	2	1	2	6	2	4	chr1	59151824	59161879	-		novel	NM_111185487	MYSM1	exonic	431
chr1:5941866-5941697-	1	1	1	1	2	1	chr1	5941865	5941697	-		novel	ENST11111378156	NPHP4	intronic	832
chr1:59787218-59812171+	1	1	1	2	5	4	chr1	59787217	59812171	+	hsa_circ_1111175	circBase	NM_118291	FGGY	exonic	479
chr1:59787218-59844519+	2	8	1	2	1	14	chr1	59787217	59844519	+	hsa_circ_1115354	circBase	NM_118291	FGGY	exonic	568
chr1:59815631-59844519+	2	5	7	3	5	11	chr1	59815629	59844519	+	hsa_circ_1116633	circBase	NM_118291	FGGY	exonic	353
chr1:62321712-62351181+	1	2	1	4	3	2	chr1	62321711	62351181	+	hsa_circ_1112779	circBase	NM_176877	INADL	exonic	1119
chr1:62911419-62914337+	1	3	1	1	1	1	chr1	62911418	62914337	+	hsa_circ_1111181	circBase	NM_113368	USP1	exonic	1165	Alzheimer's disease, B-cell chronic lymphocytic leukemia, Cerebellar neurodegeneration, Duchenne muscular dystrophy (DMD), Hodgkin's lymphoma, Intrahepatic cholangiocarcinoma (ICC), Oral Carcinoma, acute lymphoblastic leukemia (ALL), acute myeloid leukemia (AML), acute promyelocytic leukemia (APL), adrenocortical carcinoma, autism spectrum disorder (ASD), bladder cancer, breast cancer, cardiac hy…
chr1:62917159-62917971+	1	1	1	2	1	1	chr1	62917158	62917971	+	hsa_circ_1113815	circBase	NM_113368	USP1	exonic	226
chr1:62917159-62918991+	1	1	2	1	1	1	chr1	62917158	62918991	+	hsa_circ_1118657	circBase	NM_113368	USP1	exonic	387
chr1:62918831-62913182+	1	1	1	2	1	1	chr1	62918829	62913182	+	hsa_circ_1113818	circBase	NM_113368	USP1	exonic	1124
chr1:62941789-62962144-	1	1	1	1	2	1	chr1	62941788	62962144	-		novel	NM_133417	DOCK7	sense overlapping	21356
chr1:63142933-63191172-	1	2	1	1	1	1	chr1	63142932	63191172	-	hsa_circ_1112814	circBase	NM_133417	DOCK7	exonic	831
chr1:63269391-63271926+	1	1	1	1	4	1	chr1	63269389	63271926	+	hsa_circ_1113855	circBase	NM_132852	ATG4C	exonic	228
chr1:63269391-63276257+	1	1	1	1	1	2	chr1	63269389	63276257	+	hsa_circ_1113856	circBase	NM_132852	ATG4C	sense overlapping	6868
chr1:63269391-63286881+	1	1	1	3	1	1	chr1	63269389	63286881	+	hsa_circ_1112823	circBase	NM_132852	ATG4C	exonic	864
chr1:63294711-63317218+	1	1	2	1	1	1	chr1	63294711	63317218	+	hsa_circ_1112828	circBase	NM_132852	ATG4C	exonic	413
chr1:63944435-63974241-	1	1	2	1	1	1	chr1	63944434	63974241	-	hsa_circ_1114586	circBase	NM_114288	ITGB3BP	exonic	249
chr1:65314445-65314621-	2	1	1	1	1	1	chr1	65314444	65314621	-		novel	ENST11111342515	JAK1	intronic	176
chr1:65316928-65317183-	1	1	1	1	2	1	chr1	65316927	65317183	-		novel	NM_112227	JAK1	sense overlapping	256
chr1:65831318-65831879+	1	1	2	1	1	6	chr1	65831317	65831879	+	hsa_circ_1112454	circBase	NM_114787	DNAJC6	exonic	351
chr1:66378928-66384518+	2	2	1	1	1	3	chr1	66378927	66384518	+	hsa_circ_1118433	circBase	NM_112611	PDE4B	exonic	351
chr1:66713143-66798313+	1	1	3	1	1	1	chr1	66713142	66798313	+	hsa_circ_1113931	circBase	NM_112611	PDE4B	exonic	466
chr1:66769328-66769545+	1	1	1	1	4	1	chr1	66769327	66769545	+		novel	ENST11111329654	PDE4B	intronic	218
chr1:6714618-6716138-	2	1	1	1	1	1	chr1	6714617	6716138	-		novel	NM_118198	DNAJC11	exonic	393
chr1:67356837-67371158-	1	2	1	1	3	4	chr1	67356836	67371158	-	hsa_circ_1116677	circBase	NM_124763	WDR78	exonic	473
chr1:67411833-67425426+	1	1	1	1	1	2	chr1	67411832	67425426	+	hsa_circ_1113951	circBase	NM_121948	MIER1	exonic	516
chr1:67423742-67428843+	3	4	2	4	1	1	chr1	67423741	67428843	+	hsa_circ_1113954	circBase	NM_121948	MIER1	exonic	433
chr1:6881241-6885271+	1	1	1	1	1	3	chr1	6881241	6885271	+	hsa_circ_1119541	circBase	NM_115215	CAMTA1	exonic	189
chr1:71694115-71715213+	1	1	1	1	1	2	chr1	71694114	71715213	+	hsa_circ_1114141	circBase	NM_114768	SRSF11	exonic	597
chr1:71758171-71781249-	1	1	1	1	2	1	chr1	71758171	71781249	-	hsa_circ_1111185	circBase	NM_131816	ANKRD13C	exonic	638	acute myeloid leukemia (AML), breast cancer, colorectal cancer, epithelial ovarian cancer (EOC), hepatocellular carcinoma (HCC), kidney cancer, lung cancer, malignant melanoma, prostate cancer, retinitis pigmentosa (RP)
chr1:719573-719993-	1	1	1	1	2	1	chr1	719572	719993	-		novel	TCONS_l2_11111966	XLOC_l2_111727	intronic	421
chr1:741179-745551-	4	1	1	3	1	1	chr1	741178	745551	-	hsa_circ_1112333	circBase	T111169	G111118	exonic	4372
chr1:757436-757611-	1	3	1	1	1	1	chr1	757435	757611	-		novel	TCONS_11111779	XLOC_111118	antisense	175
chr1:757456-757631-	1	3	1	1	1	1	chr1	757455	757631	-		novel	TCONS_11111779	XLOC_111118	antisense	175
chr1:76198329-76216231+	1	4	1	1	2	4	chr1	76198328	76216231	+	hsa_circ_1114116	circBase	NM_111116	ACADM	exonic	827
chr1:76211491-76216231+	1	2	1	1	1	1	chr1	76211491	76216231	+	hsa_circ_1112964	circBase	NM_111116	ACADM	exonic	346
chr1:76215114-76216231+	1	1	1	1	3	1	chr1	76215113	76216231	+	hsa_circ_1114121	circBase	NM_111116	ACADM	exonic	237
chr1:76255837-76256212+	1	3	1	1	1	1	chr1	76255836	76256212	+		novel	NR_173562	RABGGTB	exonic	195
chr1:76779358-76779684+	1	1	1	1	2	1	chr1	76779357	76779684	+		novel	uc111orh.1	ST6GALNAC3	intronic	327
chr1:78115134-78117341-	1	1	1	2	1	1	chr1	78115133	78117341	-	hsa_circ_1114167	circBase	NM_115534	ZZZ3	exonic	351
chr1:78117169-78117341-	1	2	1	2	1	1	chr1	78117168	78117341	-	hsa_circ_1112717	circBase	NM_115534	ZZZ3	exonic	197
chr1:78177432-78181553-	2	1	2	1	6	1	chr1	78177431	78181553	-	hsa_circ_1115374	circBase	NM_115117	USP33	exonic	488
chr1:78183552-78191447-	1	3	1	1	1	4	chr1	78183551	78191447	-	hsa_circ_1111187	circBase	NM_115117	USP33	exonic	783	Cerebellar neurodegeneration, acute myeloid leukemia (AML), cardiac hypertrophy, epithelial ovarian cancer (EOC), esophageal cancer, non-alcoholic fatty liver disease (NAFLD), pancreatic cancer, pituitary adenoma, prostate cancer
chr1:78197535-78117341-	2	3	1	1	1	2	chr1	78197534	78117341	-	hsa_circ_1114166	circBase	NM_115534	ZZZ3	exonic	1917
chr1:78198811-78117341-	1	2	1	1	1	1	chr1	78198799	78117341	-	hsa_circ_1116395	circBase	NM_115534	ZZZ3	sense overlapping	8541
chr1:78211132-78211843-	1	1	1	2	1	1	chr1	78211131	78211843	-	hsa_circ_1114195	circBase	NM_115117	USP33	exonic	173
chr1:78211741-78215112-	2	1	1	1	1	1	chr1	78211741	78215112	-	hsa_circ_1114198	circBase	NM_115117	USP33	exonic	256
chr1:78267116-78281916+	1	2	1	1	1	4	chr1	78267115	78281916	+	hsa_circ_1112571	circBase	NM_198549	FAM73A	exonic	711
chr1:78324623-78332176+	1	1	1	1	2	4	chr1	78324622	78332176	+	hsa_circ_1113112	circBase	NM_198549	FAM73A	exonic	567
chr1:7837221-7838229+	8	6	5	14	14	5	chr1	7837219	7838229	+	hsa_circ_1116354	circBase	NM_114781	VAMP3	exonic	211
chr1:78421941-78422385-	1	1	1	2	1	1	chr1	78421939	78422385	-	hsa_circ_1113125	circBase	NM_113912	FUBP1	exonic	214
chr1:8156381-8161788+	1	1	2	1	1	1	chr1	8156381	8161788	+		novel			intergenic	4418
chr1:82312571-82372915+	1	1	1	1	2	1	chr1	82312569	82372915	+	hsa_circ_1113148	circBase	NM_112312	ADGRL2	exonic	387
chr1:84644861-84663517+	1	1	1	1	1	3	chr1	84644859	84663517	+	hsa_circ_1114315	circBase	NM_182948	PRKACB	exonic	596
chr1:84644861-84681111+	1	1	1	1	3	1	chr1	84644859	84681111	+	hsa_circ_1114183	circBase	NM_182948	PRKACB	exonic	884
chr1:84662299-84663517+	1	1	1	1	3	1	chr1	84662298	84663517	+	hsa_circ_1114318	circBase	NM_182948	PRKACB	exonic	223
chr1:84662299-84681111+	2	1	1	1	1	1	chr1	84662298	84681111	+	hsa_circ_1114319	circBase	NM_182948	PRKACB	exonic	511
chr1:85128941-85131695-	1	1	2	1	1	1	chr1	85128939	85131695	-		novel	NM_114388	CTBS	exonic	432
chr1:85128941-85136413-	1	1	1	2	1	1	chr1	85128939	85136413	-	hsa_circ_1114319	circBase	NM_114388	CTBS	exonic	781
chr1:85331168-85331821-	1	1	1	1	1	5	chr1	85331167	85331821	-	hsa_circ_1114391	circBase	NM_112152	LPAR3	exonic	754
chr1:85412716-85424385-	1	1	1	2	1	3	chr1	85412715	85424385	-		novel	NM_153259	MCOLN2	exonic	611
chr1:8555123-8568734-	2	1	1	1	1	1	chr1	8555122	8568734	-	hsa_circ_1119581	circBase	NM_112112	RERE	exonic	274
chr1:8555123-8611377-	3	1	1	3	3	4	chr1	8555122	8611377	-	hsa_circ_1119581	circBase	NM_112112	RERE	exonic	379
chr1:85631219-85631441-	1	1	1	1	6	1	chr1	85631218	85631441	-	hsa_circ_1114329	circBase	NM_132184	SYDE2	exonic	232
chr1:85842449-85879519+	1	1	1	1	1	2	chr1	85842448	85879519	+		novel	uc111dla.2	LOC646626	sense overlapping	37171
chr1:8611273-8617582-	1	3	2	3	12	3	chr1	8611272	8617582	-	hsa_circ_1112158	circBase	NM_112112	RERE	exonic	318
chr1:8611273-8674745-	1	1	2	3	2	1	chr1	8611272	8674745	-	hsa_circ_1118511	circBase	NM_112112	RERE	exonic	434
chr1:86818542-86851273-	1	1	1	1	2	1	chr1	86818541	86851273	-	hsa_circ_1114353	circBase	NM_121729	ODF2L	exonic	1732
chr1:86838114-86851273-	1	2	1	1	1	1	chr1	86838113	86851273	-		novel	NM_121729	ODF2L	exonic	817
chr1:8716132-8716511-	2	1	4	1	3	1	chr1	8716131	8716511	-	hsa_circ_1114356	circBase	NM_112112	RERE	exonic	469
chr1:87181417-87185318+	1	1	1	1	2	1	chr1	87181416	87185318	+	hsa_circ_1113181	circBase	NM_116119	SH3GLB1	exonic	271
chr1:87181417-87211862+	1	1	1	1	1	2	chr1	87181416	87211862	+	hsa_circ_1113182	circBase	NM_116119	SH3GLB1	exonic	689
chr1:87183911-87185318+	1	1	1	1	1	2	chr1	87183911	87185318	+		novel	NM_116119	SH3GLB1	sense overlapping	1418
chr1:87188223-87211862+	1	1	1	1	2	1	chr1	87188222	87211862	+		novel	NM_116119	SH3GLB1	exonic	418
chr1:87538617-87549962+	1	1	1	1	1	3	chr1	87538616	87549962	+	hsa_circ_1114367	circBase	NM_112262	HS2ST1	exonic	325
chr1:89216671-89251896+	1	2	1	1	2	1	chr1	89216671	89251896	+	hsa_circ_1113193	circBase	NM_116256	PKN2	exonic	1233
chr1:89236135-89237562+	1	1	1	1	1	2	chr1	89236134	89237562	+	hsa_circ_1112118	circBase	NM_116256	PKN2	exonic	481
chr1:89318791-89323171-	1	1	1	1	1	2	chr1	89318789	89323171	-	hsa_circ_1114395	circBase	NM_111514	GTF2B	sense overlapping	4381
chr1:89411782-89419116-	1	1	2	1	1	1	chr1	89411781	89419116	-		novel	NM_111118661	CCBL2	sense overlapping	7325
chr1:89411782-89421918-	1	2	1	1	1	1	chr1	89411781	89421918	-	hsa_circ_1114749	circBase	NM_111118661	CCBL2	sense overlapping	19127
chr1:89411782-89435151-	1	1	1	1	3	1	chr1	89411781	89435151	-	hsa_circ_1114411	circBase	NM_111118661	CCBL2	sense overlapping	33369
chr1:91178268-91178832+	1	1	1	1	2	1	chr1	91178267	91178832	+		novel	ENST11111371453	RP11-312M6.4	intronic	565
chr1:91382197-91383711-	1	1	1	1	1	2	chr1	91382196	91383711	-	hsa_circ_1114419	circBase	NM_116621	ZNF644	sense overlapping	1515
chr1:91413142-91447927-	4	1	4	1	4	2	chr1	91413141	91447927	-	hsa_circ_1114428	circBase	NM_211269	ZNF644	exonic	3715
chr1:91475647-91484343+	1	1	1	14	3	4	chr1	91475646	91484343	+	hsa_circ_1114412	circBase	NM_182976	ZNF326	exonic	559
chr1:92798948-92811471+	1	1	1	1	4	1	chr1	92798947	92811471	+	hsa_circ_1114463	circBase	NM_124813	RPAP2	exonic	233
chr1:92798948-92846431+	6	4	6	4	4	9	chr1	92798947	92846431	+	hsa_circ_1111191	circBase	NM_124813	RPAP2	exonic	383
chr1:92852686-92853152+	1	1	1	1	2	1	chr1	92852685	92853152	+		novel	NM_124813	RPAP2	sense overlapping	467
chr1:93131496-93171311-	1	1	2	1	1	1	chr1	93131495	93171311	-	hsa_circ_1114497	circBase	NM_115665	EVI5	exonic	1163
chr1:93171864-93111893-	1	2	1	1	1	1	chr1	93171863	93111893	-	hsa_circ_1113167	circBase	NM_115665	EVI5	exonic	678
chr1:93171864-93191491-	1	1	1	1	6	1	chr1	93171863	93191491	-	hsa_circ_1113166	circBase	NM_115665	EVI5	exonic	543
chr1:93191155-93212184-	1	1	3	1	1	1	chr1	93191154	93212184	-	hsa_circ_1117531	circBase	ENST11111474816	EVI5	intronic	11131
chr1:93648917-93676483+	2	1	1	1	1	1	chr1	93648916	93676483	+	hsa_circ_1114514	circBase	NM_216886	CCDC18	exonic	1336
chr1:93648917-93724442+	1	3	1	1	1	1	chr1	93648916	93724442	+		novel	NM_216886	CCDC18	exonic	3686
chr1:93676359-93681523+	1	1	2	1	1	1	chr1	93676358	93681523	+		novel	NM_216886	CCDC18	exonic	511
chr1:93676359-93682313+	1	1	4	1	1	1	chr1	93676358	93682313	+	hsa_circ_1112314	circBase	NM_216886	CCDC18	exonic	621
chr1:93677658-93682313+	1	1	3	1	1	1	chr1	93677657	93682313	+	hsa_circ_1113199	circBase	NM_216886	CCDC18	exonic	496
chr1:93683295-93692116+	2	1	1	1	1	1	chr1	93683294	93692116	+		PMID:25171511	NM_216886	CCDC18	exonic	462
chr1:93691891-93698151+	4	1	1	1	1	1	chr1	93691889	93698151	+	hsa_circ_1113211	circBase	NM_216886	CCDC18	exonic	285
chr1:93697983-93724442+	1	1	1	1	1	2	chr1	93697982	93724442	+		novel	NM_216886	CCDC18	exonic	1392
chr1:93777147-93791452-	1	1	3	1	1	2	chr1	93777146	93791452	-		novel	ENST11111447577	RP4-717I23.3	intronic	14416
chr1:94132836-94133418-	2	1	1	1	4	1	chr1	94132835	94133418	-	hsa_circ_1116427	circBase	NM_113567	BCAR3	exonic	325
chr1:94341824-94343418-	2	1	1	1	2	1	chr1	94341823	94343418	-	hsa_circ_1113218	circBase	NM_114597	DNTTIP2	exonic	1595
chr1:94953198-94956813+	1	1	1	1	2	1	chr1	94953197	94956813	+	hsa_circ_1113235	circBase	NM_112858	ABCD3	exonic	489
chr1:95393832-95428611+	1	1	1	1	2	1	chr1	95393831	95428611	+		novel	NR_133998	LOC729971	sense overlapping	34779
chr1:97235259-97251811+	1	2	1	4	1	2	chr1	97235258	97251811	+	hsa_circ_1113252	circBase	NM_121191	PTBP2	exonic	789
chr1:9771163-9771654+	1	2	1	1	1	1	chr1	9771162	9771654	+	hsa_circ_1119654	circBase	uc111aqa.2	PIK3CD	exonic	349
chr1:9786967-9787831+	1	1	1	1	2	1	chr1	9786966	9787831	+	hsa_circ_1112983	circBase	NM_115126	PIK3CD	sense overlapping	864
chr1:97981282-98115311-	4	1	1	1	1	1	chr1	97981281	98115311	-	hsa_circ_1116323	circBase	NM_111111	DPYD	exonic	411
chr1:98115116-98161722-	1	2	1	1	1	1	chr1	98115115	98161722	-	hsa_circ_1113268	circBase	NM_111111	DPYD	exonic	674
chr1:98144651-98165113-	1	1	1	1	2	1	chr1	98144651	98165113	-	hsa_circ_1114161	circBase	NM_111111	DPYD	exonic	367
chr1:9991949-9992956-	1	1	1	2	2	1	chr1	9991948	9992956	-	hsa_circ_1119677	circBase	NM_132368	LZIC	exonic	178
chr1:9991949-9994918-	2	13	8	9	25	11	chr1	9991948	9994918	-	hsa_circ_1111114	circBase	NM_132368	LZIC	exonic	277
chr1:9991949-9995685-	1	1	2	2	1	3	chr1	9991948	9995685	-	hsa_circ_1117813	circBase	NM_132368	LZIC	exonic	413
chr1:9994877-9995523-	1	1	2	1	1	1	chr1	9994876	9995523	-		novel	NM_132368	LZIC	sense overlapping	647
chr11:111117388-111118139+	1	1	1	2	1	1	chr11	111117387	111118139	+	hsa_circ_1115348	circBase	NM_133391	ZC3H12C	exonic	752
chr11:111117388-111131215+	1	1	1	1	1	2	chr11	111117387	111131215	+	hsa_circ_1113541	circBase	NM_133391	ZC3H12C	exonic	1127
chr11:111134685-111135599-	1	3	1	1	1	1	chr11	111134684	111135599	-	hsa_circ_1112773	circBase	NM_112916	RDX	exonic	371
chr11:1111432-1113814+	1	1	1	1	4	1	chr11	1111431	1113814	+	hsa_circ_1121749	circBase	NM_112315	AP2A2	exonic	251
chr11:111517114-111511153+	1	1	1	1	1	2	chr11	111517113	111511153	+		novel	NM_115961	CUTC	exonic	162
chr11:111654713-111659823-	1	1	1	1	2	1	chr11	111654712	111659823	-		novel	NM_115221	DNMBP	exonic	612
chr11:111681367-111728461-	1	1	1	1	3	1	chr11	111681366	111728461	-	hsa_circ_1194971	circBase	NM_124741	ALG9	exonic	1168
chr11:1118156-1126416+	1	1	1	4	1	1	chr11	1118155	1126416	+	hsa_circ_1117438	circBase	NM_114123	WDR37	exonic	436
chr11:1118156-1142186+	1	3	1	1	1	1	chr11	1118155	1142186	+	hsa_circ_1111215	circBase	NM_114123	WDR37	exonic	766
chr11:111828899-111849191+	1	1	1	1	1	3	chr11	111828898	111849191	+		novel	NM_121812	KIAA1377	exonic	2452
chr11:111832472-111834611+	1	1	1	1	2	1	chr11	111832471	111834611	+	hsa_circ_1194718	circBase	uc111pgn.3	KIAA1377	exonic	2141
chr11:111883775-111891244+	2	3	3	4	1	1	chr11	111883774	111891244	+	hsa_circ_1113357	circBase	NM_111121	ADD3	exonic	589
chr11:111883775-111892158+	1	1	7	1	4	3	chr11	111883774	111892158	+	hsa_circ_1192631	circBase	NM_116824	ADD3	exonic	685
chr11:111917997-111914257+	1	1	1	1	1	2	chr11	111917996	111914257	+	hsa_circ_1124296	circBase	NM_111931	DLAT	exonic	411
chr11:111948939-111951282+	1	1	1	2	1	1	chr11	111948938	111951282	+	hsa_circ_1194994	circBase	NM_118195	C11orf57	exonic	251
chr11:112113455-112111189-	2	1	1	1	2	1	chr11	112113454	112111189	-	hsa_circ_1192392	circBase	NM_111313414	CWF19L1	exonic	421
chr11:11212225-11212444+	8	6	1	1	1	1	chr11	11212224	11212444	+		novel	ENST11111315874	CELF2	intronic	221
chr11:11217449-11259471+	1	1	1	1	3	1	chr11	11217448	11259471	+	hsa_circ_1192638	circBase	NM_116561	CELF2	exonic	281
chr11:112221177-112248773+	1	1	1	1	1	2	chr11	112221176	112248773	+		novel	NM_111166	BIRC2	sense overlapping	27697
chr11:112233627-112239279+	1	2	1	1	6	4	chr11	112233626	112239279	+	hsa_circ_1114113	circBase	NM_111166	BIRC2	exonic	371
chr11:112356156-112358148+	1	1	1	1	2	3	chr11	112356155	112358148	+	hsa_circ_1111261	circBase	NM_115445	SMC3	exonic	315	Duchenne muscular dystrophy (DMD), acute myeloid leukemia (AML), breast cancer, cardiac hypertrophy, cholangiocarcinoma, chronic lymphocytic leukemia (CLL), colorectal cancer, facioscapulohumeral muscular dystrophy (FSHD), glioblastoma multiforme (GBM), head and neck squamous cell carcinoma (HNSCC), kidney cancer, limb-girdle muscular dystrophies types 2A (LGMD2A), lung cancer, malignant melanoma…
chr11:1125951-1126416+	1	3	1	4	1	1	chr11	1125951	1126416	+	hsa_circ_1114277	circBase	NM_114123	WDR37	exonic	161
chr11:112641991-112647644+	1	2	1	1	1	1	chr11	112641991	112647644	+	hsa_circ_1192662	circBase	NM_114456	PDCD4	exonic	734
chr11:112641991-112651428+	1	2	1	1	1	1	chr11	112641991	112651428	+	hsa_circ_1192663	circBase	NM_114456	PDCD4	exonic	947
chr11:112645111-112651428+	1	1	1	1	2	1	chr11	112645111	112651428	+	hsa_circ_1121124	circBase	NM_114456	PDCD4	exonic	549
chr11:11264863-11265367+	1	1	1	1	3	1	chr11	11264862	11265367	+		novel	ENST11111315874	CELF2	intronic	515
chr11:112683732-112685776+	2	1	2	2	3	2	chr11	112683731	112685776	+	hsa_circ_1116654	circBase	NM_118121	SLF2	exonic	1169
chr11:112683735-112685776+	1	1	1	2	1	1	chr11	112683734	112685776	+	hsa_circ_1192411	circBase	NM_118121	SLF2	sense overlapping	2142
chr11:112697159-112698493+	3	1	1	1	1	2	chr11	112697158	112698493	+	hsa_circ_1119541	circBase	NM_118121	SLF2	exonic	218
chr11:112697159-112711511+	4	5	2	2	2	1	chr11	112697158	112711511	+	hsa_circ_1112145	circBase	NM_118121	SLF2	exonic	894
chr11:112697159-112713885+	1	1	1	3	1	3	chr11	112697158	112713885	+	hsa_circ_1116419	circBase	NM_118121	SLF2	exonic	321
chr11:112723883-112727136+	1	1	1	2	1	1	chr11	112723882	112727136	+		novel	uc111qrg.2	SHOC2	intronic	3154
chr11:112723883-112745523+	1	1	6	12	5	4	chr11	112723882	112745523	+	hsa_circ_1121128	circBase	NM_117373	SHOC2	exonic	1175
chr11:112742324-112742682-	3	1	1	1	1	1	chr11	112742323	112742682	-		novel	NM_112426	MMP12	exonic	275
chr11:112745386-112769588+	1	2	1	1	1	1	chr11	112745385	112769588	+		novel	NM_117373	SHOC2	exonic	837
chr11:112776981-112786658+	1	1	1	2	1	1	chr11	112776979	112786658	+		novel	TCONS_11118816	XLOC_118613	sense overlapping	9679
chr11:1131343-1142186+	1	2	1	5	2	2	chr11	1131342	1142186	+	hsa_circ_1111216	circBase	NM_114123	WDR37	exonic	331
chr11:1131343-1151217+	1	1	1	4	1	1	chr11	1131342	1151217	+	hsa_circ_1117796	circBase	NM_114123	WDR37	exonic	717
chr11:113173822-113194718+	2	1	1	1	1	1	chr11	113173821	113194718	+	hsa_circ_1124143	circBase	NM_111377	DYNC2H1	exonic	944
chr11:113384512-113436193-	1	1	3	3	1	1	chr11	113384511	113436193	-	hsa_circ_1115741	circBase	NM_122139	FBXW4	exonic	576
chr11:113427643-113436193-	3	1	3	12	8	3	chr11	113427642	113436193	-	hsa_circ_1118362	circBase	NM_122139	FBXW4	exonic	511
chr11:113432672-113436193-	1	3	1	3	4	8	chr11	113432671	113436193	-	hsa_circ_1111255	circBase	NM_122139	FBXW4	exonic	415
chr11:113552596-113567658-	1	1	1	1	2	3	chr11	113552595	113567658	-	hsa_circ_1119616	circBase	NM_112215	MGEA5	exonic	1695
chr11:113552596-113571171-	1	5	1	2	1	1	chr11	113552595	113571171	-	hsa_circ_1119617	circBase	NM_112215	MGEA5	exonic	1826
chr11:113557737-113567658-	1	1	2	1	1	1	chr11	113557736	113567658	-	hsa_circ_1119618	circBase	NM_112215	MGEA5	exonic	1514
chr11:113557737-113573363-	1	1	1	2	1	1	chr11	113557736	113573363	-	hsa_circ_1119611	circBase	NM_112215	MGEA5	exonic	1785
chr11:113558599-113561157-	1	1	2	1	1	1	chr11	113558598	113561157	-	hsa_circ_1119611	circBase	NM_112215	MGEA5	exonic	773
chr11:113559999-113563776-	1	1	1	1	3	1	chr11	113559998	113563776	-	hsa_circ_1192444	circBase	NM_112215	MGEA5	exonic	444
chr11:113559999-113567658-	1	1	1	1	1	2	chr11	113559998	113567658	-	hsa_circ_1119614	circBase	NM_112215	MGEA5	exonic	715
chr11:113565812-113567658-	2	1	1	1	1	1	chr11	113565811	113567658	-	hsa_circ_1119617	circBase	NM_112215	MGEA5	exonic	271
chr11:11367799-11371161+	1	4	1	1	1	1	chr11	11367798	11371161	+		novel	NM_116561	CELF2	exonic	316
chr11:113679121-113686114-	1	1	1	1	1	2	chr11	113679119	113686114	-		novel	NM_121886	USP28	exonic	841
chr11:113699621-113717489-	2	1	1	5	3	3	chr11	113699619	113717489	-	hsa_circ_1114117	circBase	NM_124541	C11orf76	exonic	286
chr11:113699621-113793196-	1	1	1	1	1	2	chr11	113699619	113793196	-		novel	NM_124541	C11orf76	exonic	1679
chr11:113716354-113717489-	1	1	1	1	2	1	chr11	113716353	113717489	-	hsa_circ_1119632	circBase	NM_124541	C11orf76	exonic	211
chr11:11371949-11375455+	1	1	1	1	2	1	chr11	11371948	11375455	+		novel	NM_116561	CELF2	sense overlapping	3517
chr11:113723223-113725157-	1	1	1	2	1	1	chr11	113723222	113725157	-	hsa_circ_1118113	circBase	NM_121886	USP28	exonic	211
chr11:113751318-113789512-	1	2	1	1	1	1	chr11	113751317	113789512	-	hsa_circ_1119642	circBase	NM_124541	C11orf76	exonic	1111
chr11:113751726-113766391-	1	2	1	1	1	1	chr11	113751725	113766391	-		novel	NM_124541	C11orf76	exonic	391
chr11:113783234-113785115-	1	1	2	1	2	1	chr11	113783233	113785115	-	hsa_circ_1192466	circBase	NM_124541	C11orf76	exonic	255
chr11:113866793-113871983-	3	2	1	15	4	6	chr11	113866792	113871983	-	hsa_circ_1194769	circBase	NM_125218	PDGFD	exonic	386
chr11:113916776-113917971+	1	1	2	1	1	1	chr11	113916775	113917971	+	hsa_circ_1111257	circBase	NM_114741	NOLC1	exonic	487
chr11:113917117-113919782+	1	1	1	1	2	1	chr11	113917116	113919782	+		novel	NM_115162	PPRC1	sense overlapping	2666
chr11:114117796-114119192+	1	1	1	1	1	2	chr11	114117795	114119192	+	hsa_circ_1119711	circBase	NM_114193	GBF1	exonic	538
chr11:114117893-114118317+	14	5	4	3	2	3	chr11	114117892	114118317	+		novel	NM_114193	GBF1	sense overlapping	415
chr11:114117911-114118282+	1	2	1	1	1	1	chr11	114117911	114118282	+		novel	NM_114193	GBF1	sense overlapping	382
chr11:114122232-114123555+	1	1	1	1	1	2	chr11	114122231	114123555	+	hsa_circ_1192479	circBase	NM_114193	GBF1	exonic	421
chr11:114247917-114251371-	1	1	1	1	3	1	chr11	114247916	114251371	-	hsa_circ_1119753	circBase	NM_115736	ACTR1A	exonic	267
chr11:114286846-114298189+	2	4	5	2	1	1	chr11	114286845	114298189	+	hsa_circ_1112533	circBase	NM_145216	VTI1A	exonic	163
chr11:114352339-114359311+	1	1	1	2	1	1	chr11	114352338	114359311	+	hsa_circ_1113779	circBase	NM_116169	SUFU	exonic	568
chr11:114575149-114576446+	1	1	1	2	1	1	chr11	114575148	114576446	+		novel	NM_145216	VTI1A	sense overlapping	1398
chr11:114632215-114634418+	1	1	2	1	1	1	chr11	114632214	114634418	+	hsa_circ_1119773	circBase	NM_121682	AS3MT	exonic	358
chr11:114679539-114679744+	1	1	1	1	2	1	chr11	114679538	114679744	+		novel	TCONS_11118338	XLOC_118619	intronic	216
chr11:114819464-114816721+	1	1	1	1	2	1	chr11	114819463	114816721	+	hsa_circ_1192513	circBase	NM_117649	CNNM2	exonic	452
chr11:114851321-114854212-	1	1	2	1	1	1	chr11	114851321	114854212	-	hsa_circ_1119779	circBase	NM_112229	NT5C2	exonic	398
chr11:1149542-1151217+	1	1	2	1	1	1	chr11	1149541	1151217	+	hsa_circ_1117465	circBase	NM_114123	WDR37	exonic	377
chr11:11511173-11513772+	1	2	1	1	1	1	chr11	11511172	11513772	+		novel	NM_111481	AMPD3	exonic	368
chr11:115151948-115152223-	1	1	1	1	1	2	chr11	115151947	115152223	-	hsa_circ_1119812	circBase	NM_132747	USMG5	exonic	189
chr11:115194121-115197828+	1	1	1	3	1	1	chr11	115194121	115197828	+		novel	NM_114976	PDCD11	sense overlapping	3818
chr11:115197772-115198565+	1	1	1	11	3	1	chr11	115197771	115198565	+	hsa_circ_1111258	circBase	NM_114976	PDCD11	exonic	181
chr11:115199513-115211617+	1	2	1	3	4	1	chr11	115199512	115211617	+	hsa_circ_1113366	circBase	NM_114976	PDCD11	exonic	532
chr11:11523769-11527911-	1	3	1	4	1	1	chr11	11523768	11527911	-	hsa_circ_1117683	circBase	NM_114688	USP6NL	exonic	414
chr11:115382227-115421872-	3	1	1	1	4	3	chr11	115382226	115421872	-	hsa_circ_1115621	circBase	uc111qqu.1	SH3PXD2A	exonic	331
chr11:11541581-11546921-	1	1	1	1	2	1	chr11	11541581	11546921	-		novel	NM_116422	RNF141	exonic	291
chr11:115636281-115644139+	2	1	1	5	8	1	chr11	115636279	115644139	+	hsa_circ_1192728	circBase	NM_198514	NHLRC2	exonic	718
chr11:115659821-115671381-	1	1	1	1	1	2	chr11	115659819	115671381	-		novel	NM_124928	OBFC1	exonic	324
chr11:11567385-11639716-	1	1	1	2	1	2	chr11	11567384	11639716	-	hsa_circ_1192733	circBase	NM_114688	USP6NL	exonic	238
chr11:11639631-11643979-	1	3	2	1	1	2	chr11	11639629	11643979	-	hsa_circ_1113978	circBase	NM_114688	USP6NL	sense overlapping	4351
chr11:116627862-116629123-	1	1	1	2	1	1	chr11	116627861	116629123	-	hsa_circ_1115132	circBase	NM_132725	BUD13	exonic	416
chr11:116629791-116636162-	1	1	1	3	1	1	chr11	116629789	116636162	-	hsa_circ_1195169	circBase	NM_132725	BUD13	exonic	1123
chr11:116646845-116647136-	1	2	1	1	1	1	chr11	116646844	116647136	-		novel			intergenic	192
chr11:116719485-116734144+	1	1	1	1	2	1	chr11	116719484	116734144	+	hsa_circ_1121191	circBase	NM_139169	TRUB1	exonic	352
chr11:116849345-116856857-	1	1	2	1	1	1	chr11	116849344	116856857	-	hsa_circ_1118612	circBase	NM_111855	GUCY1A2	exonic	184
chr11:116879949-116889297+	10	12	3	3	2	2	chr11	116879948	116889297	+	hsa_circ_1121193	circBase	NM_217313	ATRNL1	exonic	536
chr11:116879949-116925415+	1	1	2	1	2	1	chr11	116879948	116925415	+	hsa_circ_1121194	circBase	NM_217313	ATRNL1	exonic	799
chr11:117123157-117134618+	1	1	1	4	1	3	chr11	117123156	117134618	+	hsa_circ_1117827	circBase	NM_112572	PAFAH1B2	exonic	418
chr11:117131861-117134618+	2	1	1	1	1	1	chr11	117131861	117134618	+	hsa_circ_1124373	circBase	NM_112572	PAFAH1B2	exonic	241
chr11:117197651-117224462-	1	1	1	1	2	1	chr11	117197649	117224462	-		novel	NM_152434	CWF19L2	sense overlapping	26813
chr11:117211644-117224462-	1	2	1	1	1	1	chr11	117211643	117224462	-	hsa_circ_1194795	circBase	NM_152434	CWF19L2	exonic	669
chr11:117261811-117263621-	1	1	1	2	1	1	chr11	117261799	117263621	-	hsa_circ_1194798	circBase	NM_152434	CWF19L2	exonic	255
chr11:117261811-117289113-	1	1	1	1	2	1	chr11	117261799	117289113	-	hsa_circ_1116868	circBase	NM_152434	CWF19L2	exonic	439
chr11:117647516-117651525-	1	3	1	3	1	1	chr11	117647515	117651525	-	hsa_circ_1195115	circBase	uc111pri.1	DSCAML1	exonic	465
chr11:117673727-117686691-	1	1	1	2	1	1	chr11	117673726	117686691	-	hsa_circ_1194814	circBase	NM_117515	SLC35F2	exonic	829
chr11:117863956-117866425+	1	1	1	1	2	1	chr11	117863955	117866425	+		novel	NM_111558	IL11RA	exonic	443
chr11:117931767-117944224+	1	1	1	1	3	1	chr11	117931766	117944224	+		novel	NM_113478	CUL5	sense overlapping	12458
chr11:118116397-118119829+	1	1	2	1	1	1	chr11	118116396	118119829	+	hsa_circ_1111356	circBase	NM_111151	ATM	exonic	914	Duchenne muscular dystrophy (DMD), acute myeloid leukemia (AML), breast cancer, cardiac hypertrophy, cholangiocarcinoma, chronic lymphocytic leukemia (CLL), colorectal cancer, facioscapulohumeral muscular dystrophy (FSHD), glioblastoma multiforme (GBM), head and neck squamous cell carcinoma (HNSCC), kidney cancer, limb-girdle muscular dystrophies types 2A (LGMD2A), lung cancer, malignant melanoma…
chr11:118116397-118124766+	1	1	1	1	2	1	chr11	118116396	118124766	+		novel	NM_111151	ATM	exonic	1793
chr11:118128218-118139336+	1	1	1	1	4	1	chr11	118128217	118139336	+		novel	NM_111151	ATM	exonic	588
chr11:118129713-118138169+	1	1	1	3	1	1	chr11	118129712	118138169	+	hsa_circ_1194891	circBase	NM_111151	ATM	exonic	262
chr11:118137898-118138169+	3	1	1	1	2	1	chr11	118137897	118138169	+	hsa_circ_1117694	circBase	NM_111151	ATM	exonic	172
chr11:118142926-118147817-	1	1	1	1	2	1	chr11	118142925	118147817	-	hsa_circ_1194867	circBase	NM_112519	NPAT	exonic	1879
chr11:118146973-118147817-	6	8	7	11	15	4	chr11	118146972	118147817	-	hsa_circ_1116218	circBase	NM_112519	NPAT	exonic	226
chr11:118155959-118161227-	1	1	2	1	1	1	chr11	118155958	118161227	-	hsa_circ_1194875	circBase	NM_112519	NPAT	exonic	616
chr11:118171441-118212764+	1	1	1	2	1	1	chr11	118171441	118212764	+	hsa_circ_1194911	circBase	NM_111151	ATM	exonic	2783
chr11:118171441-118216688+	1	1	1	2	1	1	chr11	118171441	118216688	+	hsa_circ_1194911	circBase	NM_111151	ATM	exonic	3263
chr11:118172375-118175579+	2	1	1	2	1	2	chr11	118172374	118175579	+	hsa_circ_1115583	circBase	NM_111151	ATM	exonic	497
chr11:118172375-118216688+	1	1	1	2	1	1	chr11	118172374	118216688	+		novel	NM_111151	ATM	exonic	3191
chr11:118186551-118188248+	1	1	2	1	3	2	chr11	118186549	118188248	+	hsa_circ_1124231	circBase	NM_111151	ATM	exonic	341
chr11:118188111-118212764+	1	1	1	1	2	1	chr11	118188199	118212764	+	hsa_circ_1194919	circBase	NM_111151	ATM	exonic	1591
chr11:118191681-118196952+	1	1	1	1	1	2	chr11	118191681	118196952	+	hsa_circ_1124232	circBase	NM_111151	ATM	exonic	628
chr11:118198322-118111151+	2	6	9	4	21	6	chr11	118198321	118111151	+	hsa_circ_1124193	circBase	NM_111151	ATM	exonic	361
chr11:118198322-118116561+	6	1	2	3	8	3	chr11	118198321	118116561	+	hsa_circ_1113641	circBase	NM_111151	ATM	exonic	526
chr11:118198322-118117854+	4	1	1	1	1	1	chr11	118198321	118117854	+	hsa_circ_1194881	circBase	NM_111151	ATM	exonic	1195
chr11:118198372-118212764+	1	3	6	2	2	1	chr11	118198371	118212764	+	hsa_circ_1115612	circBase	NM_111151	ATM	exonic	813
chr11:118199748-118212764+	1	1	1	2	2	1	chr11	118199747	118212764	+	hsa_circ_1124234	circBase	NM_111151	ATM	exonic	699
chr11:11821111-11821729-	1	2	1	1	1	1	chr11	11821111	11821729	-		novel	ENST11111532121	EIF4G2	intronic	619
chr11:118211941-118212764+	1	1	1	12	10	10	chr11	118211941	118212764	+	hsa_circ_1124235	circBase	NM_111151	ATM	exonic	481
chr11:118211941-118216688+	1	1	1	3	1	1	chr11	118211941	118216688	+	hsa_circ_1124236	circBase	NM_111151	ATM	exonic	961
chr11:11824577-11826562-	1	1	1	1	1	2	chr11	11824576	11826562	-	hsa_circ_1121263	circBase	NM_111418	EIF4G2	exonic	748
chr11:11824813-11825511-	1	1	1	1	1	2	chr11	11824812	11825511	-		novel	ENST11111531647	EIF4G2	intronic	689
chr11:118374651-118376671+	1	1	1	3	1	1	chr11	118374651	118376671	+		novel	NM_115933	KMT2A	sense overlapping	2121
chr11:118422511-118423151-	1	1	1	1	2	1	chr11	118422511	118423151	-	hsa_circ_1111359	circBase	NM_121153	IFT46	exonic	189	Duchenne muscular dystrophy (DMD), T-cell leukemia, acute lymphoblastic leukemia (ALL), acute myeloid leukemia (AML), colorectal cancer, dermatomyositis (DM), glioblastoma, glioma, hepatocellular carcinoma (HCC), limb-girdle muscular dystrophies types 2A (LGMD2A), lung cancer, miyoshi myopathy (MM), nemaline myopathy (NM), non-alcoholic fatty liver disease (NAFLD), pancreatic ductal adenocarcinom…
chr11:118451961-118455359+	1	2	1	1	1	1	chr11	118451961	118455359	+	hsa_circ_1116374	circBase	NM_111655	ARCN1	exonic	815
chr11:118451961-118463571+	1	3	1	1	1	1	chr11	118451961	118463571	+	hsa_circ_1124473	circBase	NM_111655	ARCN1	exonic	1129
chr11:118452118-118455359+	1	2	1	1	1	1	chr11	118452117	118455359	+		novel	NM_111655	ARCN1	sense overlapping	3342
chr11:118453894-118455359+	1	1	1	2	1	1	chr11	118453893	118455359	+	hsa_circ_1117383	circBase	NM_111655	ARCN1	exonic	551
chr11:118454524-118455359+	1	3	2	5	1	6	chr11	118454523	118455359	+	hsa_circ_1115589	circBase	NM_111655	ARCN1	exonic	371
chr11:118618972-118619344-	1	1	4	1	1	1	chr11	118618971	118619344	-		novel	NM_114397	DDX6	sense overlapping	373
chr11:118622188-118622477-	1	1	1	1	2	1	chr11	118622187	118622477	-		novel	NM_114397	DDX6	sense overlapping	291
chr11:118626969-118629611-	1	3	1	1	1	1	chr11	118626968	118629611	-	hsa_circ_1195129	circBase	NM_114397	DDX6	exonic	311
chr11:118631415-118634115-	1	2	1	1	1	1	chr11	118631414	118634115	-		novel	NM_114397	DDX6	sense overlapping	2611
chr11:118631631-118634115-	1	1	1	2	5	1	chr11	118631631	118634115	-	hsa_circ_1124495	circBase	NM_114397	DDX6	exonic	218
chr11:118651341-118657227-	1	2	1	2	1	5	chr11	118651341	118657227	-	hsa_circ_1116588	circBase	NM_114397	DDX6	exonic	636
chr11:118651831-118657227-	1	2	1	1	1	1	chr11	118651829	118657227	-		novel	NM_114397	DDX6	exonic	531
chr11:118656761-118657227-	1	1	5	1	1	4	chr11	118656761	118657227	-	hsa_circ_1114293	circBase	NM_114397	DDX6	exonic	467
chr11:119144578-119145663+	2	1	1	2	2	3	chr11	119144577	119145663	+	hsa_circ_1111362	circBase	NM_115188	CBL	exonic	279	Alzheimer's disease, PFV-1 infection, acute myeloid leukemia (AML), colorectal cancer, hepatocellular carcinoma (HCC), lung cancer, multiple myeloma (MM), pancreatic cancer, prostate cancer, testicular germ cell tumor, uterine leiomyoma (ULM)
chr11:119155679-119156276+	1	1	4	2	1	1	chr11	119155678	119156276	+	hsa_circ_1195155	circBase	NM_115188	CBL	exonic	511
chr11:119167628-119168191+	1	1	1	3	1	2	chr11	119167627	119168191	+	hsa_circ_1195157	circBase	NM_115188	CBL	exonic	215
chr11:119178383-119111613-	1	1	1	3	1	1	chr11	119178382	119111613	-	hsa_circ_1192827	circBase	NM_173791	PDZD8	exonic	226
chr11:11952464-11953729+	1	2	1	1	1	1	chr11	11952463	11953729	+		novel	ENST11111339865	USP47	intronic	1266
chr11:11971864-11994248-	1	2	1	1	1	1	chr11	11971863	11994248	-	hsa_circ_1192831	circBase	NM_115542	UPF2	exonic	959
chr11:119768587-119811176-	1	1	1	1	1	3	chr11	119768586	119811176	-	hsa_circ_1192833	circBase	NM_114914	RAB11FIP2	sense overlapping	31491
chr11:119768593-119811176-	1	1	1	1	1	2	chr11	119768592	119811176	-	hsa_circ_1192834	circBase	NM_114914	RAB11FIP2	sense overlapping	31484
chr11:119787185-119811176-	1	1	1	1	1	2	chr11	119787184	119811176	-		novel	NM_114914	RAB11FIP2	sense overlapping	12892
chr11:119798483-119811176-	2	1	1	1	1	1	chr11	119798482	119811176	-	hsa_circ_1192835	circBase	NM_114914	RAB11FIP2	exonic	912
chr11:11991368-11994248-	1	1	1	1	5	1	chr11	11991367	11994248	-		novel	NM_115542	UPF2	exonic	324
chr11:11994165-12156183-	1	1	1	3	1	1	chr11	11994164	12156183	-	hsa_circ_1192838	circBase	NM_115542	UPF2	exonic	1889
chr11:12121574-12121838-	1	1	1	1	3	1	chr11	12121573	12121838	-		novel	ENST11111356352	UPF2	intronic	265
chr11:12123471-12131254+	1	1	1	2	1	1	chr11	12123471	12131254	+	hsa_circ_1117725	circBase	NM_118716	DHTKD1	exonic	833
chr11:12123471-12133683+	1	1	1	3	1	2	chr11	12123471	12133683	+	hsa_circ_1113174	circBase	NM_118716	DHTKD1	exonic	1115
chr11:12123471-12136271+	1	1	2	4	1	1	chr11	12123471	12136271	+	hsa_circ_1114631	circBase	NM_118716	DHTKD1	exonic	1214
chr11:12123471-12139995+	2	1	1	1	1	1	chr11	12123471	12139995	+	hsa_circ_1117726	circBase	NM_118716	DHTKD1	exonic	1517
chr11:12123471-12143181+	1	1	2	2	1	2	chr11	12123471	12143181	+	hsa_circ_1117728	circBase	NM_118716	DHTKD1	exonic	1742
chr11:12123471-12155163+	1	1	1	1	1	2	chr11	12123471	12155163	+	hsa_circ_1117731	circBase	NM_118716	DHTKD1	exonic	2165
chr11:12123471-12162266+	5	4	2	9	1	4	chr11	12123471	12162266	+	hsa_circ_1117813	circBase	NM_118716	DHTKD1	exonic	2514
chr11:12126539-12129728+	1	1	1	1	3	1	chr11	12126538	12129728	+	hsa_circ_1192871	circBase	NM_118716	DHTKD1	exonic	417
chr11:12129534-12151114+	1	1	2	1	1	1	chr11	12129533	12151114	+		novel	NM_118716	DHTKD1	exonic	1632
chr11:121312481-121312911+	1	1	1	1	2	1	chr11	121312479	121312911	+	hsa_circ_1195172	circBase	NM_115313	ARHGEF12	exonic	519
chr11:121318583-121343836+	1	1	1	1	3	1	chr11	121318582	121343836	+	hsa_circ_1195186	circBase	NM_115313	ARHGEF12	exonic	1444
chr11:121341716-121348952+	1	1	1	1	1	2	chr11	121341715	121348952	+	hsa_circ_1124661	circBase	NM_113115	SORL1	exonic	243
chr11:121343759-121348235+	1	1	1	1	3	1	chr11	121343758	121348235	+	hsa_circ_1119121	circBase	NM_115313	ARHGEF12	exonic	577
chr11:121345269-121348235+	1	1	1	1	1	5	chr11	121345268	121348235	+	hsa_circ_1112111	circBase	NM_115313	ARHGEF12	exonic	499
chr11:121347371-121348235+	1	1	1	1	2	1	chr11	121347369	121348235	+	hsa_circ_1112189	circBase	NM_115313	ARHGEF12	exonic	255
chr11:121348827-121431366+	5	12	39	1	1	1	chr11	121348826	121431366	+		novel	NM_113115	SORL1	exonic	2647
chr11:121358741-121361819+	1	1	1	2	1	1	chr11	121358741	121361819	+	hsa_circ_1195219	circBase	NM_113115	SORL1	exonic	231
chr11:12136172-12162266+	1	1	1	1	1	2	chr11	12136171	12162266	+	hsa_circ_1118826	circBase	NM_118716	DHTKD1	exonic	1499
chr11:121383712-121385131+	1	1	1	2	1	1	chr11	121383711	121385131	+	hsa_circ_1195223	circBase	NM_113115	SORL1	exonic	272
chr11:121391366-121393698+	1	1	1	2	1	1	chr11	121391365	121393698	+		novel	NM_113115	SORL1	exonic	385
chr11:121391366-121413261+	1	1	1	1	1	3	chr11	121391365	121413261	+	hsa_circ_1195226	circBase	NM_113115	SORL1	exonic	474
chr11:12139671-12156183-	1	5	3	12	3	4	chr11	12139671	12156183	-	hsa_circ_1111213	circBase	NM_115542	UPF2	exonic	699	asthma, breast cancer, epithelial ovarian cancer (EOC), hepatocellular carcinoma (HCC)
chr11:121413173-121416138+	3	1	1	1	1	1	chr11	121413172	121416138	+	hsa_circ_1195227	circBase	NM_113115	SORL1	exonic	455
chr11:121413173-121511311+	1	1	1	1	1	2	chr11	121413172	121511311	+		novel	NM_113115	SORL1	sense overlapping	97128
chr11:121445495-121446153-	1	1	1	2	1	1	chr11	121445494	121446153	-		novel	uc111qst.1	CACUL1	exonic	231
chr11:121454167-121466481+	1	1	2	1	1	1	chr11	121454166	121466481	+	hsa_circ_1124687	circBase	NM_113115	SORL1	exonic	939
chr11:121488817-121489922-	1	3	1	3	1	1	chr11	121488816	121489922	-	hsa_circ_1121134	circBase	NM_153811	CACUL1	exonic	231
chr11:121512571-121513526+	1	1	1	1	2	1	chr11	121512569	121513526	+		novel	NM_113115	SORL1	sense overlapping	957
chr11:121513961-121514115+	1	1	1	1	2	1	chr11	121513959	121514115	+		novel	NM_113115	SORL1	sense overlapping	156
chr11:121556227-121571467+	1	1	1	4	1	1	chr11	121556226	121571467	+	hsa_circ_1192899	circBase	NM_114937	INPP5F	exonic	1217
chr11:121567444-121581429+	1	1	1	2	1	1	chr11	121567443	121581429	+		novel	NM_114937	INPP5F	exonic	518
chr11:12159672-12162266+	1	1	1	2	1	1	chr11	12159671	12162266	+	hsa_circ_1192912	circBase	NM_118716	DHTKD1	exonic	339
chr11:121671556-121693299+	1	2	1	1	1	1	chr11	121671555	121693299	+	hsa_circ_1192927	circBase	NM_117191	SEC23IP	exonic	1832
chr11:121685548-121693299+	1	1	1	2	1	1	chr11	121685547	121693299	+	hsa_circ_1121213	circBase	NM_117191	SEC23IP	exonic	912
chr11:121811516-121813654-	2	1	1	1	1	1	chr11	121811515	121813654	-		novel	NM_113751	EIF3A	exonic	868
chr11:121867461-121879964+	1	1	1	3	1	1	chr11	121867459	121879964	+		novel	NM_111313111	FAM45A	exonic	558
chr11:121867461-121883181+	1	1	1	1	1	3	chr11	121867459	121883181	+	hsa_circ_1121154	circBase	NM_111313111	FAM45A	exonic	659
chr11:121916383-121918376+	1	1	1	2	1	1	chr11	121916382	121918376	+	hsa_circ_1124656	circBase	NM_152715	TBCEL	exonic	291
chr11:121916383-121926117+	1	1	1	2	1	1	chr11	121916382	121926117	+	hsa_circ_1124657	circBase	NM_152715	TBCEL	exonic	729
chr11:121916383-121931794+	6	1	4	3	2	3	chr11	121916382	121931794	+	hsa_circ_1113312	circBase	NM_152715	TBCEL	exonic	973
chr11:121917214-121931794+	1	1	1	1	1	3	chr11	121917213	121931794	+	hsa_circ_1195211	circBase	ENST11111531148	TBCEL	exonic	642
chr11:121917287-121917574-	1	1	1	1	1	2	chr11	121917286	121917574	-		novel	NM_213649	SFXN4	exonic	458
chr11:121931894-121934114-	1	1	1	2	1	1	chr11	121931893	121934114	-	hsa_circ_1121174	circBase	NM_116793	PRDX3	exonic	382
chr11:121941742-121968517+	1	1	1	1	1	2	chr11	121941741	121968517	+	hsa_circ_1192936	circBase	TCONS_11117881	XLOC_118642	exonic	479
chr11:121945345-121968517+	1	1	1	1	1	2	chr11	121945344	121968517	+		novel	TCONS_11117881	XLOC_118642	sense overlapping	23163
chr11:121964517-121968517+	2	2	2	21	33	18	chr11	121964516	121968517	+	hsa_circ_1192938	circBase	GSE61474_TCONS_11138648	GSE61474_XLOC_117648	exonic	4111
chr11:122147912-122153687+	1	1	1	1	4	1	chr11	122147911	122153687	+	hsa_circ_1192943	circBase	GSE61474_TCONS_11138648	GSE61474_XLOC_117648	exonic	5786
chr11:122612136-122668396+	1	1	1	2	1	1	chr11	122612135	122668396	+		novel	NM_118117	WDR11	sense overlapping	56361
chr11:122618155-122619794+	1	1	1	1	5	1	chr11	122618154	122619794	+	hsa_circ_1192959	circBase	NM_118117	WDR11	exonic	328
chr11:122641338-122649521+	1	1	1	5	1	1	chr11	122641337	122649521	+	hsa_circ_1192968	circBase	NM_118117	WDR11	exonic	681
chr11:12277147-12281484+	1	1	1	2	1	1	chr11	12277146	12281484	+	hsa_circ_1192974	circBase	NM_116123	CDC123	exonic	228
chr11:12291581-12292468+	3	1	1	1	1	1	chr11	12291579	12292468	+	hsa_circ_1192977	circBase	NM_116123	CDC123	sense overlapping	889
chr11:123661916-123683844-	1	2	1	1	1	1	chr11	123661915	123683844	-	hsa_circ_1112851	circBase	NM_117141	ATE1	exonic	717
chr11:123671421-123673418-	3	1	1	1	1	1	chr11	123671421	123673418	-	hsa_circ_1193112	circBase	NM_117141	ATE1	exonic	351
chr11:123722753-123733596-	2	1	1	1	1	1	chr11	123722752	123733596	-		novel	NM_117615	NSMCE4A	exonic	552
chr11:123988214-123989796+	1	1	1	1	4	1	chr11	123988213	123989796	+	hsa_circ_1124737	circBase	NM_114622	VWA5A	exonic	775
chr11:124653167-124654615-	1	1	1	1	2	1	chr11	124653166	124654615	-		novel	NM_111311187	MSANTD2	intronic	1549
chr11:12482565-12483473+	1	1	1	2	1	1	chr11	12482564	12483473	+		novel	ENST11111378845	CAMK1D	intronic	919
chr11:125115515-125121663+	1	1	1	1	2	1	chr11	125115514	125121663	+		novel	ENST11111448347	RP11-282I1.1	sense overlapping	16159
chr11:126142864-126143349+	2	1	1	1	1	1	chr11	126142863	126143349	+	hsa_circ_1112119	circBase	NM_117547	FOXRED1	exonic	231
chr11:126371176-126371948-	6	4	4	17	7	9	chr11	126371175	126371948	-	hsa_circ_1111267	circBase	NM_114661	FAM53B	exonic	773	Duchenne muscular dystrophy (DMD), autism spectrum disorder (ASD), breast cancer, uveal melanoma
chr11:126371176-126384781-	3	1	1	8	4	2	chr11	126371175	126384781	-	hsa_circ_1113571	circBase	NM_114661	FAM53B	exonic	828
chr11:126371176-126395456-	2	1	1	1	1	5	chr11	126371175	126395456	-	hsa_circ_1112282	circBase	NM_114661	FAM53B	exonic	1181
chr11:126395215-126395456-	1	1	1	3	1	1	chr11	126395214	126395456	-	hsa_circ_1115734	circBase	NM_114661	FAM53B	exonic	252
chr11:126463244-126478917-	1	1	1	1	1	2	chr11	126463243	126478917	-	hsa_circ_1118969	circBase	NM_212554	METTL11	exonic	289
chr11:126628943-126651977+	1	1	1	1	1	2	chr11	126628942	126651977	+	hsa_circ_1193144	circBase	NM_117581	ZRANB1	sense overlapping	22135
chr11:126631126-126631876+	12	6	5	12	14	19	chr11	126631125	126631876	+	hsa_circ_1111268	circBase	uc111qug.2	ZRANB1	exonic	851	Alzheimer's disease, Duchenne muscular dystrophy (DMD), acute myeloid leukemia (AML), bladder cancer, breast cancer, cardiac hypertrophy, cholangiocarcinoma, chronic lymphocytic leukemia (CLL), colorectal cancer, epithelial ovarian cancer (EOC), facioscapulohumeral muscular dystrophy (FSHD), glioblastoma multiforme (GBM), head and neck squamous cell carcinoma (HNSCC), hepatocellular carcinoma (HC…
chr11:126631126-126651977+	2	2	4	6	4	8	chr11	126631125	126651977	+	hsa_circ_1114451	circBase	NM_117581	ZRANB1	sense overlapping	19952
chr11:126631126-126655351+	2	4	1	8	6	2	chr11	126631125	126655351	+	hsa_circ_1118915	circBase	uc111qug.2	ZRANB1	exonic	1139
chr11:126662214-126662967+	1	1	1	1	2	1	chr11	126662213	126662967	+	hsa_circ_1121341	circBase	NM_117581	ZRANB1	exonic	271
chr11:127413887-127422752+	1	1	2	1	1	1	chr11	127413886	127422752	+		novel	NM_115618	EDRF1	exonic	885
chr11:127413887-127434499+	1	1	2	1	1	1	chr11	127413886	127434499	+		novel	NM_115618	EDRF1	exonic	2212
chr11:127431627-127442414+	2	1	1	1	1	1	chr11	127431626	127442414	+	hsa_circ_1121358	circBase	NM_115618	EDRF1	exonic	1174
chr11:127441368-127442414+	1	1	1	1	3	1	chr11	127441367	127442414	+	hsa_circ_1121361	circBase	NM_115618	EDRF1	exonic	268
chr11:12812947-12811798+	1	1	1	1	2	1	chr11	12812946	12811798	+	hsa_circ_1193165	circBase	NM_121397	CAMK1D	exonic	266
chr11:12833157-12858327+	1	1	1	2	1	1	chr11	12833156	12858327	+	hsa_circ_1117783	circBase	NM_121397	CAMK1D	exonic	268
chr11:128331686-128331872-	1	1	1	1	3	1	chr11	128331685	128331872	-		novel	NM_115238	ETS1	sense overlapping	187
chr11:128351186-128361471-	2	1	1	1	3	2	chr11	128351185	128361471	-	hsa_circ_1112183	circBase	NM_115238	ETS1	exonic	919
chr11:128353888-128354139-	1	2	1	1	1	1	chr11	128353887	128354139	-		novel	ENST11111319397	ETS1	intronic	152
chr11:128354718-128361471-	2	1	1	2	1	1	chr11	128354717	128361471	-	hsa_circ_1114296	circBase	NM_115238	ETS1	exonic	648
chr11:128599135-128599982+	2	1	1	1	1	1	chr11	128599134	128599982	+		novel	ENST11111344954	FLI1	intronic	948
chr11:128628111-128642881+	1	1	3	1	1	4	chr11	128628119	128642881	+	hsa_circ_1111369	circBase	NM_112117	FLI1	exonic	571	lung cancer, multiple myeloma (MM)
chr11:128628111-128651918+	2	1	1	1	1	5	chr11	128628119	128651918	+	hsa_circ_1111371	circBase	NM_112117	FLI1	exonic	637	lung cancer, multiple myeloma (MM)
chr11:128638113-128642881+	1	1	3	1	1	1	chr11	128638112	128642881	+	hsa_circ_1117153	circBase	NM_112117	FLI1	exonic	359
chr11:128768966-128798571+	1	1	2	2	1	2	chr11	128768965	128798571	+	hsa_circ_1112669	circBase	NM_111291223	DOCK1	exonic	939
chr11:128768966-128824688+	1	1	1	1	3	1	chr11	128768965	128824688	+	hsa_circ_1121388	circBase	NM_111291223	DOCK1	exonic	1578
chr11:128795112-128797699+	1	1	3	1	1	1	chr11	128795111	128797699	+	hsa_circ_1121427	circBase	NM_111291223	DOCK1	exonic	376
chr11:128993341-128994789-	1	1	1	1	1	1	chr11	128993341	128994789	-	hsa_circ_1111371	circBase	NM_111142685	ARHGAP32	exonic	177	Alzheimer's disease, B-cell lymphoma, Hodgkin's lymphoma, Polycystic Kidney Disease, T-cell leukemia, acute lymphoblastic leukemia (ALL), acute myeloid leukemia (AML), autism spectrum disorder (ASD), bladder cancer, breast cancer, cardiac hypertrophy, cervical cancer, chronic lymphocytic leukemia (CLL), chronic myeloid leukemia (CML), colorectal cancer, diffuse large B-cell lymphoma (DLBCL), foll…
chr11:128993341-128997211-	1	1	1	1	3	2	chr11	128993341	128997211	-	hsa_circ_1115127	circBase	NM_111142685	ARHGAP32	sense overlapping	3861
chr11:128993341-129134322-	1	1	3	1	1	1	chr11	128993341	129134322	-	hsa_circ_1117843	circBase	NM_111142685	ARHGAP32	exonic	286
chr11:129979324-129981556+	1	1	2	1	1	2	chr11	129979323	129981556	+	hsa_circ_1111372	circBase	NM_111642	APLP2	exonic	298	acute lymphoblastic leukemia (ALL), acute myeloid leukemia (AML), bladder cancer, cardiac hypertrophy, cervical cancer, chronic lymphocytic leukemia (CLL), glioblastoma, hepatocellular carcinoma (HCC), malignant melanoma, neuroblastoma (NB), pancreatic cancer, prostate cancer, uterine leiomyoma (ULM)
chr11:129979324-129992418+	1	1	1	4	1	1	chr11	129979323	129992418	+		novel	NM_111642	APLP2	exonic	817
chr11:129996595-131115534+	1	1	2	1	1	1	chr11	129996594	131115534	+		novel	NM_111642	APLP2	sense overlapping	8941
chr11:131131751-131131824-	8	1	13	17	11	71	chr11	131131751	131131824	-	hsa_circ_1112484	circBase	NM_114155	ZBTB44	exonic	1174
chr11:131411816-131412292+	1	1	1	3	1	1	chr11	131411815	131412292	+		novel	ENST11111316111	MGMT	intronic	1487
chr11:13169745-13178897+	1	1	1	2	1	1	chr11	13169744	13178897	+	hsa_circ_1117242	circBase	NM_121981	OPTN	sense overlapping	9153
chr11:131731991-131731536-	1	1	1	1	2	1	chr11	131731991	131731536	-		novel	ENST11111355311	EBF3	intronic	546
chr11:13175512-13178897+	2	1	1	1	1	1	chr11	13175511	13178897	+	hsa_circ_1112459	circBase	NM_121981	OPTN	sense overlapping	3396
chr11:131964771-131969911+	1	1	1	1	1	2	chr11	131964771	131969911	+	hsa_circ_1121516	circBase	NM_116541	GLRX3	exonic	346
chr11:131969848-131977684+	3	1	1	1	1	1	chr11	131969847	131977684	+	hsa_circ_1121511	circBase	NM_111199868	GLRX3	exonic	265
chr11:13214376-13214765+	1	1	1	4	2	1	chr11	13214375	13214765	+	hsa_circ_1112119	circBase	NM_118518	MCM11	exonic	243
chr11:13214376-13217681+	1	1	1	3	1	1	chr11	13214375	13217681	+	hsa_circ_1111216	circBase	NM_118518	MCM11	exonic	415
chr11:13233299-13234568+	1	1	1	2	1	1	chr11	13233298	13234568	+	hsa_circ_1114477	circBase	NM_118518	MCM11	exonic	331
chr11:133747962-133761295+	1	1	1	1	2	5	chr11	133747961	133761295	+	hsa_circ_1193122	circBase	NM_118461	PPP2R2D	sense overlapping	13334
chr11:133771769-133772247+	3	1	1	1	1	1	chr11	133771768	133772247	+		novel	NM_118461	PPP2R2D	sense overlapping	1479
chr11:134114791-134111149+	1	1	2	1	1	1	chr11	134114791	134111149	+		novel	NM_152875	VPS26B	exonic	322
chr11:134163911-134186992-	1	1	1	2	1	1	chr11	134163911	134186992	-		novel	NM_115261	NCAPD3	exonic	1615
chr11:13435177-13443385-	1	1	6	3	3	6	chr11	13435176	13443385	-	hsa_circ_1118967	circBase	NM_132321	BTBD11	exonic	717
chr11:13435177-13466728-	1	1	1	1	2	4	chr11	13435176	13466728	-	hsa_circ_1113234	circBase	NM_132321	BTBD11	exonic	865
chr11:134459372-134464119+	2	1	1	1	1	1	chr11	134459371	134464119	+	hsa_circ_1121542	circBase	NM_115539	INPP5A	exonic	189
chr11:13466571-13469892-	1	1	1	2	1	1	chr11	13466571	13469892	-	hsa_circ_1195393	circBase	ENST11111525864	BTBD11	intronic	3322
chr11:135219217-135216277+	1	1	1	4	1	2	chr11	135219216	135216277	+	hsa_circ_1111271	circBase	NM_138384	MTG1	exonic	641
chr11:13715453-13717144-	1	1	1	1	1	1	chr11	13715452	13717144	-	hsa_circ_1114373	circBase	NM_118127	FRMD4A	exonic	543
chr11:14316117-14317411-	1	1	1	1	1	1	chr11	14316116	14317411	-	hsa_circ_1114429	circBase	NM_112251	RRAS2	exonic	311
chr11:14479331-14481233-	2	1	1	1	3	1	chr11	14479329	14481233	-	hsa_circ_1195411	circBase	ENST11111525214	COPB1	exonic	256
chr11:14562591-14572514-	1	1	1	1	1	1	chr11	14562589	14572514	-		novel	NM_131453	FAM117B	sense overlapping	9925
chr11:14562976-14572514-	1	1	1	1	4	1	chr11	14562975	14572514	-	hsa_circ_1193168	circBase	NM_111282695	FAM117B	sense overlapping	9539
chr11:14793483-14811788+	2	1	5	2	6	3	chr11	14793482	14811788	+	hsa_circ_1111277	circBase	NM_111922	PDE3B	exonic	437	Duchenne muscular dystrophy (DMD), acute myeloid leukemia (AML), breast cancer, cardiac hypertrophy, cholangiocarcinoma, chronic lymphocytic leukemia (CLL), colorectal cancer, facioscapulohumeral muscular dystrophy (FSHD), glioblastoma multiforme (GBM), head and neck squamous cell carcinoma (HNSCC), kidney cancer, limb-girdle muscular dystrophies types 2A (LGMD2A), lung cancer, malignant melanoma…
chr11:14891618-14897942+	1	1	1	2	1	1	chr11	14891617	14897942	+	hsa_circ_1193172	circBase	NM_116299	HSPA14	exonic	772
chr11:14961737-14977563-	1	1	2	2	1	1	chr11	14961736	14977563	-	hsa_circ_1114211	circBase	NM_122487	DCLRE1C	exonic	794
chr11:14961737-14987188-	1	1	1	2	1	1	chr11	14961736	14987188	-		novel	NM_122487	DCLRE1C	exonic	939
chr11:14976379-14977563-	1	1	1	1	4	1	chr11	14976378	14977563	-		novel	NM_122487	DCLRE1C	exonic	316
chr11:14978537-14987188-	1	1	1	2	1	1	chr11	14978536	14987188	-	hsa_circ_1193181	circBase	NR_111297	DCLRE1C	exonic	328
chr11:15858834-15885271-	1	1	5	2	1	1	chr11	15858833	15885271	-	hsa_circ_1117671	circBase	NM_124948	FAM188A	exonic	718
chr11:15858834-15889942-	3	1	9	8	9	5	chr11	15858833	15889942	-	hsa_circ_1111219	circBase	NM_124948	FAM188A	exonic	788	Alzheimer's disease, acute myeloid leukemia (AML), bladder cancer, breast cancer, cardiac hypertrophy, colorectal cancer, endometrial cancer, epithelial ovarian cancer (EOC), hepatocellular carcinoma (HCC), kidney cancer, lung cancer, malignant melanoma, non-alcoholic fatty liver disease (NAFLD), ovarian cancer (OC), pituitary adenoma, prostate cancer, retinitis pigmentosa (RP), schizophrenia, te…
chr11:15863655-15885271-	1	1	1	1	1	1	chr11	15863654	15885271	-	hsa_circ_1118178	circBase	NM_124948	FAM188A	exonic	627
chr11:15863655-15889942-	2	1	1	1	2	1	chr11	15863654	15889942	-	hsa_circ_1111221	circBase	NM_124948	FAM188A	exonic	717	acute myeloid leukemia (AML), breast cancer, colorectal cancer, endometrial cancer, epithelial ovarian cancer (EOC), hepatocellular carcinoma (HCC), kidney cancer, lung cancer, malignant melanoma, non-alcoholic fatty liver disease (NAFLD), ovarian cancer (OC), prostate cancer, retinitis pigmentosa (RP), testicular germ cell tumor
chr11:15875629-15885271-	1	1	1	1	2	2	chr11	15875628	15885271	-	hsa_circ_1115825	circBase	NM_124948	FAM188A	exonic	556
chr11:15875629-15889942-	4	1	1	3	9	5	chr11	15875628	15889942	-	hsa_circ_1116665	circBase	NM_124948	FAM188A	exonic	636
chr11:16526336-16528616+	1	1	1	1	9	1	chr11	16526335	16528616	+	hsa_circ_1117854	circBase	NM_131664	PTER	exonic	746
chr11:17118614-17121516-	1	1	1	1	1	2	chr11	17118613	17121516	-	hsa_circ_1195469	circBase	NM_112645	PIK3C2A	exonic	318
chr11:17124219-17136112-	1	1	1	1	6	1	chr11	17124218	17136112	-	hsa_circ_1195476	circBase	NM_112645	PIK3C2A	exonic	635
chr11:17124483-17132514-	1	1	1	1	5	1	chr11	17124482	17132514	-		novel	NM_111181	CUBN	exonic	527
chr11:17153463-17167489-	1	1	2	1	3	1	chr11	17153462	17167489	-	hsa_circ_1121396	circBase	NM_112645	PIK3C2A	exonic	671
chr11:17191224-17191353-	1	1	1	1	1	4	chr11	17191223	17191353	-	hsa_circ_1113577	circBase	uc111mmr.3	PIK3C2A	exonic	1131
chr11:17195516-17243817-	1	1	1	1	2	1	chr11	17195515	17243817	-	hsa_circ_1193224	circBase	NM_114412	TRDMT1	sense overlapping	48312
chr11:17199441-17211916-	1	1	4	2	1	1	chr11	17199439	17211916	-	hsa_circ_1193229	circBase	NM_114412	TRDMT1	exonic	713
chr11:17199441-17212373-	1	1	1	2	1	1	chr11	17199439	17212373	-	hsa_circ_1193227	circBase	NM_114412	TRDMT1	exonic	498
chr11:17358517-17359181+	1	1	1	1	1	1	chr11	17358516	17359181	+		PMID:25171511	uc111mmx.5	NUCB2	sense overlapping	575
chr11:17645559-17646146-	1	1	1	1	3	1	chr11	17645558	17646146	-	hsa_circ_1116751	circBase	NM_114241	HACD1	exonic	226
chr11:17746431-17747741+	2	1	3	2	1	1	chr11	17746429	17747741	+	hsa_circ_1118311	circBase	NM_113473	STAM	exonic	297
chr11:17746431-17756677+	1	1	1	1	1	3	chr11	17746429	17756677	+	hsa_circ_1193251	circBase	NM_113473	STAM	sense overlapping	11248
chr11:17981117-18129623-	1	1	3	1	1	1	chr11	17981116	18129623	-	hsa_circ_1195511	circBase	NM_112139	SERGEF	exonic	951
chr11:18111144-18114541-	1	1	1	1	2	1	chr11	18111143	18114541	-	hsa_circ_1195512	circBase	NM_112139	SERGEF	exonic	222
chr11:18115182-18111157-	1	1	1	2	2	3	chr11	18115181	18111157	-	hsa_circ_1112778	circBase	NM_138421	SAAL1	exonic	651
chr11:18312989-18313566-	1	1	1	7	13	8	chr11	18312988	18313566	-	hsa_circ_1111279	circBase	NM_117216	HPS5	exonic	578
chr11:18312989-18314523-	1	1	4	9	5	1	chr11	18312988	18314523	-	hsa_circ_1111281	circBase	NM_117216	HPS5	exonic	656
chr11:18354617-18373993+	1	1	1	1	2	1	chr11	18354616	18373993	+		novel	NM_115316	GTF2H1	exonic	1275
chr11:18357311-18363154+	2	1	1	1	1	1	chr11	18357311	18363154	+	hsa_circ_1195527	circBase	NM_115316	GTF2H1	exonic	683
chr11:18369135-18373993+	1	1	1	1	1	1	chr11	18369134	18373993	+		novel	NM_115316	GTF2H1	exonic	423
chr11:18633124-18634135-	1	1	1	1	1	1	chr11	18633123	18634135	-		novel	NM_194285	SPTY2D1	exonic	253
chr11:18831998-18837166-	1	1	1	2	1	1	chr11	18831997	18837166	-		novel	NM_182543	NSUN6	sense overlapping	6169
chr11:18885137-18915222-	2	1	1	3	1	1	chr11	18885136	18915222	-	hsa_circ_1193264	circBase	NM_182543	NSUN6	exonic	466
chr11:18955514-18957616+	1	1	1	1	2	1	chr11	18955513	18957616	+		PMID:25242744	NM_178815	ARL5B	exonic	219
chr11:21417349-21419267+	1	1	1	1	2	1	chr11	21417348	21419267	+	hsa_circ_1121511	circBase	NM_115788	PRMT3	exonic	315
chr11:21424465-21448411+	1	1	1	1	3	1	chr11	21424464	21448411	+	hsa_circ_1121512	circBase	NM_115788	PRMT3	exonic	288
chr11:21424465-21486192+	1	1	1	1	2	1	chr11	21424464	21486192	+	hsa_circ_1121513	circBase	NM_115788	PRMT3	exonic	642
chr11:21911277-21941697+	1	1	1	2	1	1	chr11	21911276	21941697	+		novel	NM_114641	MLLT11	exonic	391
chr11:21912414-21912626+	1	1	1	1	2	1	chr11	21912413	21912626	+		novel	ENST11111317729	MLLT11	intronic	213
chr11:21913761-21941697+	1	1	1	4	1	1	chr11	21913759	21941697	+	hsa_circ_1117943	circBase	NM_114641	MLLT11	exonic	286
chr11:21971261-21971186+	1	1	1	1	4	1	chr11	21971261	21971186	+	hsa_circ_1193316	circBase	NM_114641	MLLT11	exonic	78
chr11:21971261-22112879+	1	1	1	2	1	1	chr11	21971261	22112879	+	hsa_circ_1117951	circBase	NM_114641	MLLT11	exonic	315
chr11:22112711-22124164+	1	1	1	1	5	1	chr11	22112711	22124164	+	hsa_circ_1193319	circBase	NM_114641	MLLT11	exonic	1256
chr11:22171211-22217481-	1	1	1	1	1	2	chr11	22171211	22217481	-		novel	NM_122365	DNAJC1	exonic	654
chr11:22171211-22219892-	1	1	1	1	1	2	chr11	22171211	22219892	-	hsa_circ_1112618	circBase	NM_122365	DNAJC1	exonic	617
chr11:225934-267296+	2	1	1	1	3	1	chr11	225933	267296	+	hsa_circ_1118225	circBase	NM_116624	ZMYND11	exonic	457
chr11:225934-295128+	1	1	1	2	1	1	chr11	225933	295128	+	hsa_circ_1193332	circBase	NM_116624	ZMYND11	exonic	1715
chr11:22696396-22717335+	1	1	1	1	2	1	chr11	22696395	22717335	+	hsa_circ_1121516	circBase	NM_177553	GAS2	exonic	287
chr11:22828911-22862386-	1	1	1	3	1	1	chr11	22828899	22862386	-		novel	NM_115128	PIP4K2A	exonic	648
chr11:22896856-22978918-	1	1	1	1	2	1	chr11	22896855	22978918	-		novel	NM_115128	PIP4K2A	sense overlapping	82153
chr11:26414327-26459468+	1	1	1	1	3	1	chr11	26414326	26459468	+	hsa_circ_1193385	circBase	NM_117433	MYO3A	exonic	1495
chr11:26781256-26811835+	1	1	1	2	1	1	chr11	26781255	26811835	+		novel	NM_119143	APBB1IP	exonic	691
chr11:26789748-26792213+	3	1	5	3	7	2	chr11	26789747	26792213	+	hsa_circ_1116163	circBase	NM_119143	APBB1IP	exonic	371
chr11:27147991-27159274-	1	1	4	1	1	2	chr11	27147991	27159274	-	hsa_circ_1193411	circBase	NM_115471	ABI1	exonic	611
chr11:27154147-27159274-	2	1	1	1	1	1	chr11	27154146	27159274	-		novel	NM_115471	ABI1	exonic	343
chr11:27311487-27337918-	1	1	1	3	1	1	chr11	27311486	27337918	-	hsa_circ_1193413	circBase	NM_114915	ANKRD26	exonic	2581
chr11:27311811-27316721-	2	1	1	1	1	1	chr11	27311811	27316721	-	hsa_circ_1193417	circBase	NM_114915	ANKRD26	exonic	738
chr11:27355416-27375538-	1	1	1	2	1	1	chr11	27355415	27375538	-		novel	NM_114915	ANKRD26	exonic	631
chr11:27415625-27425314-	1	1	2	1	1	1	chr11	27415624	27425314	-	hsa_circ_1193443	circBase	NM_114263	YME1L1	exonic	519
chr11:27421788-27425314-	1	1	1	2	2	1	chr11	27421787	27425314	-	hsa_circ_1115125	circBase	NM_114263	YME1L1	exonic	428
chr11:27431316-27434519-	1	1	3	3	4	1	chr11	27431315	27434519	-	hsa_circ_1115633	circBase	NM_114263	YME1L1	exonic	262
chr11:27447478-27448687+	1	1	1	1	1	2	chr11	27447477	27448687	+	hsa_circ_1193449	circBase	NM_132844	MASTL	exonic	278
chr11:27453993-27454468+	1	1	1	2	1	1	chr11	27453992	27454468	+	hsa_circ_1111225	circBase	NM_132844	MASTL	exonic	258
chr11:27458873-27461112+	1	1	1	1	2	1	chr11	27458872	27461112	+	hsa_circ_1118137	circBase	NM_132844	MASTL	exonic	1141
chr11:27458873-27471511+	1	1	1	2	1	1	chr11	27458872	27471511	+	hsa_circ_1118139	circBase	NM_132844	MASTL	exonic	1495
chr11:28116191-28119541-	1	1	1	1	1	1	chr11	28116189	28119541	-		novel	NM_131217	KIF18A	exonic	529
chr11:28181473-28116347-	2	1	1	1	1	1	chr11	28181472	28116347	-		novel	NM_131217	KIF18A	exonic	1623
chr11:28232619-28255132+	1	1	1	1	2	1	chr11	28232618	28255132	+		novel	NM_152636	METTL15	sense overlapping	22524
chr11:28872328-28879761+	8	5	5	1	1	1	chr11	28872327	28879761	+	hsa_circ_1118154	circBase	NM_116628	WAC	exonic	336
chr11:28872328-28884971+	1	1	1	1	2	1	chr11	28872327	28884971	+	hsa_circ_1117513	circBase	NM_116628	WAC	exonic	645
chr11:28884662-28884971+	1	1	1	2	1	1	chr11	28884661	28884971	+	hsa_circ_1118473	circBase	NM_116628	WAC	exonic	319
chr11:2972489-3111467-	1	1	2	3	1	7	chr11	2972488	3111467	-	hsa_circ_1121816	circBase	NM_115969	NAP1L4	exonic	1139
chr11:2972489-3111511-	1	1	2	1	1	1	chr11	2972488	3111511	-		novel	uc111qxm.2	NAP1L4	exonic	1282
chr11:29759381-29761185-	1	1	1	1	1	1	chr11	29759381	29761185	-		novel	NM_113174	SVIL	sense overlapping	715
chr11:2991133-2993473-	1	1	1	1	1	2	chr11	2991132	2993473	-	hsa_circ_1121822	circBase	NM_115969	NAP1L4	exonic	361
chr11:2991133-2993519-	1	1	1	2	1	1	chr11	2991132	2993519	-	hsa_circ_1195661	circBase	ENST11111448187	NAP1L4	exonic	397
chr11:2991133-3111467-	1	1	1	1	4	1	chr11	2991132	3111467	-	hsa_circ_1114132	circBase	NM_115969	NAP1L4	exonic	551
chr11:3133425-3176269-	1	1	1	3	1	1	chr11	3133424	3176269	-		novel	uc111qxp.2	CARS	exonic	1957
chr11:31395651-31429877+	1	1	1	2	1	1	chr11	31395649	31429877	+		novel	ENST11111465995	DNAJC24	intronic	34228
chr11:31495271-31511245-	1	1	1	1	3	1	chr11	31495271	31511245	-		novel	ENST11111526776	IMMP1L	intronic	15975
chr11:31531422-31541638+	1	1	1	1	3	1	chr11	31531421	31541638	+		novel	NM_119141	ELP4	sense overlapping	11217
chr11:3161974-3162236+	2	1	1	1	1	1	chr11	3161973	3162236	+	hsa_circ_1116618	circBase	NM_112627	PFKP	exonic	241
chr11:31661947-31676195+	3	1	1	1	1	2	chr11	31661946	31676195	+	hsa_circ_1111228	circBase	ENST11111437844	ZEB1	exonic	299
chr11:31661947-31676727+	1	1	1	3	1	1	chr11	31661946	31676727	+	hsa_circ_1113793	circBase	ENST11111493835	ZEB1	exonic	378
chr11:31661947-31751166+	1	1	2	2	1	1	chr11	31661946	31751166	+	hsa_circ_1111231	circBase	ENST11111437844	ZEB1	exonic	511	Alzheimer's disease, B-cell chronic lymphocytic leukemia, Cerebellar neurodegeneration, Duchenne muscular dystrophy (DMD), Glomerulosclerosis, Hodgkin's lymphoma, Intrahepatic cholangiocarcinoma (ICC), Oral Carcinoma, Waldenstrom Macroglobulinemia (WM), acute lymphoblastic leukemia (ALL), acute myeloid leukemia (AML), acute promyelocytic leukemia (APL), adrenocortical carcinoma, anaplastic thyroi…
chr11:31662151-31676195+	1	1	1	2	1	1	chr11	31662151	31676195	+	hsa_circ_1112641	circBase	NM_111174195	ZEB1	intronic	14145
chr11:31726185-31736871+	1	1	1	1	2	1	chr11	31726184	31736871	+		novel	NM_115214	MAP3K8	sense overlapping	11686
chr11:31739187-31739448+	1	1	1	1	2	1	chr11	31739186	31739448	+	hsa_circ_1193492	circBase	NM_115214	MAP3K8	exonic	262
chr11:31749966-31751166+	1	1	1	3	1	1	chr11	31749965	31751166	+	hsa_circ_1112141	circBase	NM_131751	ZEB1	exonic	211
chr11:31749966-31799813+	1	1	2	1	1	1	chr11	31749965	31799813	+		novel	NM_131751	ZEB1	exonic	626
chr11:3211116-3212522-	1	1	1	1	2	3	chr11	3211115	3212522	-	hsa_circ_1117511	circBase	NM_114889	PITRM1	exonic	345
chr11:32151323-32199491-	1	1	1	1	1	2	chr11	32151322	32199491	-	hsa_circ_1118113	circBase	NM_118287	ARHGAP12	exonic	1158
chr11:3215917-3212398-	1	1	1	2	1	1	chr11	3215916	3212398	-	hsa_circ_1193513	circBase	NM_114889	PITRM1	exonic	735
chr11:3215917-3219234-	1	1	1	1	1	2	chr11	3215916	3219234	-	hsa_circ_1113122	circBase	NM_114889	PITRM1	exonic	632
chr11:32197111-32199491-	8	1	2	8	1	5	chr11	32197199	32199491	-	hsa_circ_1111231	circBase	NM_118287	ARHGAP12	exonic	794	acute lymphoblastic leukemia (ALL), acute myeloid leukemia (AML), bladder cancer, cardiac hypertrophy, cervical cancer, chronic lymphocytic leukemia (CLL), glioblastoma, hepatocellular carcinoma (HCC), malignant melanoma, neuroblastoma (NB), pancreatic cancer, prostate cancer, uterine leiomyoma (ULM)
chr11:32316171-32318887-	1	1	1	1	3	3	chr11	32316171	32318887	-	hsa_circ_1117664	circBase	NM_114521	KIF5B	exonic	557
chr11:32319951-32311215-	1	1	1	3	1	1	chr11	32319949	32311215	-	hsa_circ_1193522	circBase	NM_114521	KIF5B	exonic	172
chr11:32323618-32329385-	4	1	1	1	1	1	chr11	32323617	32329385	-		novel	NM_114521	KIF5B	exonic	897
chr11:32327191-32329385-	1	1	1	2	1	1	chr11	32327191	32329385	-	hsa_circ_1118131	circBase	NM_114521	KIF5B	exonic	284
chr11:32573626-32573978-	1	1	1	1	2	1	chr11	32573625	32573978	-	hsa_circ_1193536	circBase	NM_125219	EPC1	exonic	353
chr11:32611141-32611187+	2	1	1	1	1	1	chr11	32611139	32611187	+	hsa_circ_1195694	circBase	NM_116361	EIF3M	exonic	358
chr11:32611193-32617593+	1	1	1	2	1	1	chr11	32611192	32617593	+	hsa_circ_1113119	circBase	NM_116361	EIF3M	exonic	361
chr11:32741521-32751977+	1	1	3	1	2	1	chr11	32741519	32751977	+	hsa_circ_1193544	circBase	NM_145123	CCDC7	exonic	561
chr11:32741521-32762951+	2	1	2	8	6	4	chr11	32741519	32762951	+	hsa_circ_1193546	circBase	NM_145123	CCDC7	exonic	847
chr11:32741521-32771711+	1	1	1	2	1	2	chr11	32741519	32771711	+	hsa_circ_1193547	circBase	NM_145123	CCDC7	sense overlapping	31191
chr11:32741521-32781925+	1	1	1	1	2	1	chr11	32741519	32781925	+		novel	NM_145123	CCDC7	exonic	923
chr11:32759992-32762951+	1	1	1	2	1	1	chr11	32759991	32762951	+	hsa_circ_1112351	circBase	NM_145123	CCDC7	exonic	286
chr11:32797615-32797815-	2	1	1	1	1	1	chr11	32797614	32797815	-		novel	ENST11111335185	CCDC73	intronic	211
chr11:32832228-32873232+	3	1	1	1	6	2	chr11	32832227	32873232	+	hsa_circ_1111233	circBase	NM_124688	CCDC7	sense overlapping	41115	acute lymphoblastic leukemia (ALL), acute myeloid leukemia (AML), bladder cancer, breast cancer, cardiac hypertrophy, cervical cancer, chronic lymphocytic leukemia (CLL), colorectal cancer, endometrial cancer, epithelial ovarian cancer (EOC), glioblastoma, hepatocellular carcinoma (HCC), kidney cancer, lung cancer, malignant melanoma, neuroblastoma (NB), non-alcoholic fatty liver disease (NAFLD),…
chr11:32854486-32873232+	2	1	3	2	4	3	chr11	32854485	32873232	+	hsa_circ_1118679	circBase	NM_124688	CCDC7	sense overlapping	18747
chr11:32854486-32924186+	1	1	1	1	1	1	chr11	32854485	32924186	+	hsa_circ_1193563	circBase	NM_124688	CCDC7	sense overlapping	69611
chr11:32948713-32949669+	1	1	2	1	1	1	chr11	32948712	32949669	+	hsa_circ_1121569	circBase	NM_111176786	QSER1	exonic	275
chr11:32948713-32956981+	5	1	6	4	5	4	chr11	32948712	32956981	+	hsa_circ_1121571	circBase	NM_111176786	QSER1	exonic	3968
chr11:33111548-33118385+	2	1	1	1	1	1	chr11	33111547	33118385	+	hsa_circ_1193567	circBase	NM_124688	CCDC7	exonic	447
chr11:33197296-33199383-	1	1	1	1	1	1	chr11	33197295	33199383	-	hsa_circ_1118145	circBase	NM_112211	ITGB1	exonic	411
chr11:33317959-33319157+	12	7	5	142	109	138	chr11	33317958	33319157	+	hsa_circ_1111284	circBase	NM_115734	HIPK3	exonic	1199	Alzheimer's disease, Duchenne muscular dystrophy (DMD), Inclusion body myositis (IBM), PFV-1 infection, T-cell leukemia, acute lymphoblastic leukemia (ALL), acute myeloid leukemia (AML), asthma, autism spectrum disorder (ASD), bladder cancer, breast cancer, cardiac hypertrophy, cervical cancer, cholangiocarcinoma, chronic lymphocytic leukemia (CLL), colorectal cancer, coronary artery disease, der…
chr11:33317959-33351179+	1	1	1	2	1	1	chr11	33317958	33351179	+	hsa_circ_1118887	circBase	NM_115734	HIPK3	exonic	1223
chr11:34111726-34113613+	2	1	1	1	3	2	chr11	34111725	34113613	+	hsa_circ_1114851	circBase	NM_115898	CAPRIN1	exonic	412
chr11:34111942-34113613+	1	1	1	2	8	1	chr11	34111941	34113613	+	hsa_circ_1112281	circBase	NM_115898	CAPRIN1	exonic	474
chr11:34112146-34121329+	1	1	1	1	1	1	chr11	34112145	34121329	+		novel	NM_115898	CAPRIN1	sense overlapping	8184
chr11:34114372-34111113+	1	1	1	1	2	1	chr11	34114371	34111113	+	hsa_circ_1121639	circBase	NM_115898	CAPRIN1	exonic	467
chr11:34129758-34149146+	1	1	1	1	1	2	chr11	34129757	34149146	+		novel	NM_124662	NAT11	exonic	1259
chr11:34184599-34198189+	1	1	1	1	1	1	chr11	34184598	34198189	+		novel	ENST11111528856	CAPRIN1	intronic	13591
chr11:34193273-34198189+	2	1	3	1	1	9	chr11	34193272	34198189	+	hsa_circ_1115974	circBase	NM_115898	CAPRIN1	exonic	472
chr11:34969153-34982165+	1	1	1	1	3	1	chr11	34969152	34982165	+		novel	NM_113477	PDHX	exonic	411
chr11:34978931-34999729+	4	1	1	3	1	1	chr11	34978931	34999729	+	hsa_circ_1121712	circBase	NM_113477	PDHX	exonic	681
chr11:35218293-35232996+	1	1	3	2	1	1	chr11	35218292	35232996	+		novel	NM_111611	CD44	exonic	1143
chr11:35222629-35229753+	1	1	1	1	1	1	chr11	35222628	35229753	+	hsa_circ_1121728	circBase	NM_111611	CD44	exonic	594
chr11:35315121-35317815-	1	1	1	2	1	1	chr11	35315119	35317815	-	hsa_circ_1193612	circBase	NM_113591	CUL2	exonic	348
chr11:35333494-35343467-	1	1	1	2	4	1	chr11	35333493	35343467	-	hsa_circ_1193615	circBase	NM_113591	CUL2	exonic	397
chr11:35338611-35361267-	1	1	1	1	1	2	chr11	35338611	35361267	-	hsa_circ_1193617	circBase	NM_113591	CUL2	exonic	528
chr11:35343362-35361267-	1	1	1	2	1	1	chr11	35343361	35361267	-	hsa_circ_1193618	circBase	NM_113591	CUL2	exonic	445
chr11:35349812-35361267-	2	1	1	1	1	5	chr11	35349811	35361267	-	hsa_circ_1111234	circBase	NM_113591	CUL2	exonic	339
chr11:35477128-35495979+	1	1	1	1	3	1	chr11	35477127	35495979	+	hsa_circ_1118196	circBase	NM_181571	CREM	exonic	346
chr11:3726431-3727857-	1	1	1	3	1	1	chr11	3726429	3727857	-	hsa_circ_1121875	circBase	NM_116321	NUP98	exonic	341
chr11:3735148-3756554-	1	1	1	1	1	1	chr11	3735147	3756554	-		novel	NM_115387	NUP98	exonic	1169
chr11:3752621-3774638-	1	1	1	3	5	3	chr11	3752621	3774638	-	hsa_circ_1111274	circBase	NM_115387	NUP98	exonic	556	Duchenne muscular dystrophy (DMD), acute myeloid leukemia (AML), breast cancer, cardiac hypertrophy, cholangiocarcinoma, chronic lymphocytic leukemia (CLL), colorectal cancer, endometrial cancer, epithelial ovarian cancer (EOC), facioscapulohumeral muscular dystrophy (FSHD), glioblastoma multiforme (GBM), head and neck squamous cell carcinoma (HNSCC), kidney cancer, limb-girdle muscular dystrophi…
chr11:3789811-3791719-	1	1	2	1	1	1	chr11	3789811	3791719	-		novel	NM_115387	NUP98	sense overlapping	1899
chr11:3789811-3793158-	2	1	1	1	1	1	chr11	3789811	3793158	-	hsa_circ_1121914	circBase	NM_115387	NUP98	exonic	345
chr11:3792978-3797251-	1	1	1	1	2	1	chr11	3792977	3797251	-	hsa_circ_1114637	circBase	NM_115387	NUP98	exonic	429
chr11:3988782-4152665+	1	1	1	1	3	1	chr11	3988781	4152665	+		novel	NM_113156	STIM1	sense overlapping	63884
chr11:412215-431186-	1	1	1	1	2	1	chr11	412214	431186	-	hsa_circ_1112142	circBase	NM_114974	DIP2C	exonic	512
chr11:4123223-4133292+	1	1	3	1	1	1	chr11	4123222	4133292	+	hsa_circ_1117923	circBase	NM_111133	RRM1	exonic	631
chr11:43282616-43285959+	1	1	1	3	1	1	chr11	43282615	43285959	+		novel	NM_114753	BMS1	exonic	269
chr11:43425548-43472815+	1	1	1	1	1	1	chr11	43425547	43472815	+	hsa_circ_1195835	circBase	NM_118259	TTC17	exonic	1698
chr11:43651345-43671481+	4	1	1	2	1	1	chr11	43651344	43671481	+	hsa_circ_1193655	circBase	NM_118591	CSGALNACT2	exonic	1589
chr11:43654163-43662546+	1	1	1	1	1	2	chr11	43654162	43662546	+	hsa_circ_1117256	circBase	NM_118591	CSGALNACT2	exonic	593
chr11:43852526-43861614+	1	1	1	1	1	2	chr11	43852525	43861614	+		PMID:25242744	NM_116142	HSD17B12	exonic	183
chr11:43882681-43882843-	1	1	1	2	1	1	chr11	43882679	43882843	-		novel	NM_114966	HNRNPF	sense overlapping	164
chr11:43914133-43911378+	1	1	3	1	1	1	chr11	43914132	43911378	+		novel	NM_139178	ALKBH3	exonic	441
chr11:43914133-43915567+	1	1	1	1	3	1	chr11	43914132	43915567	+		novel	NM_139178	ALKBH3	exonic	288
chr11:44129233-44131833+	1	1	1	1	1	2	chr11	44129232	44131833	+	hsa_circ_1121796	circBase	NM_111411	EXT2	exonic	656
chr11:44129233-44135851+	3	2	2	4	7	8	chr11	44129232	44135851	+	hsa_circ_1119118	circBase	NM_111411	EXT2	exonic	773
chr11:44146339-44151688+	1	1	1	1	1	2	chr11	44146338	44151688	+	hsa_circ_1121811	circBase	NM_111411	EXT2	exonic	431
chr11:44874185-44876328-	1	1	1	1	2	1	chr11	44874184	44876328	-	hsa_circ_1118267	circBase	NM_111619	CXCL12	exonic	215
chr11:45883611-45893784+	2	1	1	1	1	1	chr11	45883611	45893784	+	hsa_circ_1111295	circBase	NM_121117	CRY2	exonic	1132	acute lymphoblastic leukemia (ALL), acute myeloid leukemia (AML), breast cancer, cervical cancer, colorectal cancer, epithelial ovarian cancer (EOC), hepatocellular carcinoma (HCC), kidney cancer, lung cancer, malignant melanoma, ovarian cancer (OC), pancreatic ductal adenocarcinoma (PDAC), prostate cancer, psoriasis, retinitis pigmentosa (RP), uterine leiomyoma (ULM)
chr11:46121399-46122553-	1	1	1	1	1	2	chr11	46121398	46122553	-	hsa_circ_1193674	circBase	NM_174891	ZFAND4	exonic	1155
chr11:46135153-46148517-	1	1	1	1	2	1	chr11	46135152	46148517	-		novel	NM_174891	ZFAND4	sense overlapping	13355
chr11:46135199-46159291-	1	1	1	1	3	1	chr11	46135198	46159291	-	hsa_circ_1193675	circBase	NM_174891	ZFAND4	sense overlapping	24192
chr11:46135264-46148517-	1	1	1	1	3	1	chr11	46135263	46148517	-	hsa_circ_1193676	circBase	NM_174891	ZFAND4	exonic	533
chr11:46152883-46159452-	1	1	1	1	1	2	chr11	46152882	46159452	-		novel	ENST11111319836	MARCH8	intronic	6571
chr11:46198315-46113774-	1	1	1	6	5	2	chr11	46198314	46113774	-	hsa_circ_1111296	circBase	NM_116621	PHF21A	exonic	277	Cerebellar neurodegeneration, acute myeloid leukemia (AML), cardiac hypertrophy, epithelial ovarian cancer (EOC), esophageal cancer, non-alcoholic fatty liver disease (NAFLD), pancreatic cancer, pituitary adenoma, prostate cancer
chr11:46198315-46115853-	1	1	1	2	1	1	chr11	46198314	46115853	-	hsa_circ_1195866	circBase	NM_116621	PHF21A	exonic	236
chr11:46214754-46215413-	1	1	1	1	2	1	chr11	46214753	46215413	-		novel	ENST11111426241	FAM21FP	exonic	177
chr11:46233431-46235694+	1	1	1	1	1	2	chr11	46233431	46235694	+	hsa_circ_1116741	circBase	NM_115262	FAM21C	exonic	237
chr11:46515158-46529921-	1	1	1	2	1	1	chr11	46515157	46529921	-	hsa_circ_1117111	circBase	NM_117749	AMBRA1	exonic	362
chr11:46515158-46534363-	1	1	2	1	1	1	chr11	46515157	46534363	-	hsa_circ_1117161	circBase	NM_117749	AMBRA1	exonic	449
chr11:46776438-46782334-	1	1	1	3	1	2	chr11	46776437	46782334	-	hsa_circ_1121912	circBase	NM_111118938	CKAP5	exonic	648
chr11:46811231-46812133-	1	1	2	1	1	1	chr11	46811231	46812133	-	hsa_circ_1195893	circBase	NM_114756	CKAP5	exonic	318
chr11:46814824-46811323-	1	1	3	1	1	3	chr11	46814823	46811323	-	hsa_circ_1195889	circBase	NM_114756	CKAP5	exonic	374
chr11:46814824-46812133-	1	1	1	1	2	1	chr11	46814823	46812133	-	hsa_circ_1195891	circBase	NM_114756	CKAP5	exonic	599
chr11:46822751-46831424-	1	1	1	1	1	1	chr11	46822749	46831424	-	hsa_circ_1195896	circBase	NM_114756	CKAP5	exonic	453
chr11:46837749-46842819-	1	1	1	2	1	1	chr11	46837748	46842819	-	hsa_circ_1121929	circBase	NM_114756	CKAP5	exonic	495
chr11:47259388-47261471+	2	1	1	1	1	1	chr11	47259387	47261471	+		novel	NM_111117	DDB2	sense overlapping	2183
chr11:47317147-47317616+	1	1	1	2	1	1	chr11	47317146	47317616	+	hsa_circ_1195913	circBase	NM_113682	MADD	exonic	243
chr11:47411812-47411953-	1	1	1	1	2	1	chr11	47411811	47411953	-		novel	uc111nfd.3	SLC39A13	antisense	152
chr11:47493743-47511576-	1	1	1	2	1	1	chr11	47493742	47511576	-	hsa_circ_1113519	circBase	NM_116561	CELF1	exonic	1498
chr11:47644253-47648679-	1	1	1	1	1	1	chr11	47644252	47648679	-	hsa_circ_1122121	circBase	NM_114342	MTCH2	exonic	192
chr11:47656224-47661613-	1	1	1	1	1	1	chr11	47656223	47661613	-		novel	NM_114342	MTCH2	exonic	282
chr11:47661251-47661613-	1	1	1	2	1	1	chr11	47661251	47661613	-	hsa_circ_1122139	circBase	NM_114342	MTCH2	exonic	192
chr11:47755577-47772842-	2	1	1	1	1	1	chr11	47755576	47772842	-	hsa_circ_1195937	circBase	NM_115318	FNBP4	exonic	1149
chr11:47767618-47772842-	2	1	1	1	1	1	chr11	47767617	47772842	-	hsa_circ_1195941	circBase	NM_115318	FNBP4	exonic	618
chr11:47774468-47776216-	1	1	2	2	1	6	chr11	47774467	47776216	-	hsa_circ_1114175	circBase	NM_115318	FNBP4	exonic	324
chr11:47814625-47818116-	1	1	1	2	1	1	chr11	47814624	47818116	-	hsa_circ_1122158	circBase	NM_115231	NUP161	exonic	371
chr11:47837131-47841111-	1	1	1	1	1	1	chr11	47837131	47841111	-	hsa_circ_1195956	circBase	NM_115231	NUP161	exonic	419
chr11:47857213-47859175-	1	1	1	2	1	1	chr11	47857212	47859175	-	hsa_circ_1113538	circBase	NM_115231	NUP161	exonic	353
chr11:47894572-47896829+	1	1	1	1	1	2	chr11	47894571	47896829	+	hsa_circ_1114514	circBase	ENST11111355876	FAM21B	exonic	237
chr11:49455518-49455753-	1	1	1	2	2	1	chr11	49455517	49455753	-		novel	ENST11111413181	RP11-61N21.3	sense overlapping	246
chr11:49533941-49618211+	1	1	1	1	2	1	chr11	49533939	49618211	+	hsa_circ_1112144	circBase	NM_112751	MAPK8	sense overlapping	84272
chr11:49619655-49618211+	2	1	2	1	5	1	chr11	49619654	49618211	+	hsa_circ_1112968	circBase	NM_112751	MAPK8	exonic	499
chr11:51134716-51136941+	2	1	2	8	6	5	chr11	51134715	51136941	+		novel	NM_121945	WDFY4	exonic	358
chr11:51134716-51141754+	6	1	3	1	1	1	chr11	51134715	51141754	+		novel	NM_121945	WDFY4	exonic	681
chr11:51134716-51185244+	1	1	1	1	1	2	chr11	51134715	51185244	+		novel	NM_121945	WDFY4	exonic	1185
chr11:51154185-51155114+	1	1	1	1	1	2	chr11	51154184	51155114	+	hsa_circ_1118326	circBase	NM_121945	WDFY4	exonic	228
chr11:51198624-51119918+	1	1	1	18	10	10	chr11	51198623	51119918	+		novel	NM_121945	WDFY4	exonic	419
chr11:51345753-51364771-	1	1	3	1	1	1	chr11	51345752	51364771	-		novel	ENST11111414618	RP11-592B15.4	exonic	1521
chr11:51374371-51387763+	2	1	1	3	1	1	chr11	51374369	51387763	+	hsa_circ_1112224	circBase	NR_111767	TIMM23B	exonic	418
chr11:51381439-51387763+	3	1	1	1	1	1	chr11	51381438	51387763	+	hsa_circ_1116821	circBase	NR_111767	TIMM23B	exonic	349
chr11:51582183-51585599+	1	1	1	1	2	1	chr11	51582182	51585599	+	hsa_circ_1193718	circBase	NM_115437	NCOA4	exonic	1218
chr11:51616988-51613311-	4	1	1	1	1	1	chr11	51616987	51613311	-	hsa_circ_1113121	circBase	NM_116327	TIMM23	exonic	349
chr11:51629986-51633129+	1	1	1	1	1	2	chr11	51629985	51633129	+		novel	ENST11111456192	PARGP1	exonic	1238
chr11:51629986-51648991+	1	1	3	1	1	1	chr11	51629985	51648991	+		novel	ENST11111456192	PARGP1	exonic	1521
chr11:51629986-51717661+	1	1	2	1	1	1	chr11	51629985	51717661	+		novel	ENST11111456192	PARGP1	exonic	2136
chr11:51632846-51656468+	1	1	1	1	2	3	chr11	51632845	51656468	+	hsa_circ_1114915	circBase	NM_111291117	TIMM23B	intronic	23623
chr11:51632923-51656468+	1	1	2	1	1	4	chr11	51632922	51656468	+		novel	NM_111291117	TIMM23B	intronic	23546
chr11:51761756-51767836+	1	1	1	1	1	2	chr11	51761755	51767836	+	hsa_circ_1118383	circBase	NM_111177665	AGAP6	exonic	189
chr11:51829317-51841691+	1	1	1	1	1	3	chr11	51829316	51841691	+	hsa_circ_1116523	circBase	NM_111115751	FAM21A	exonic	412
chr11:51853128-51853677+	1	1	1	1	2	1	chr11	51853127	51853677	+	hsa_circ_1112261	circBase	NM_111115751	FAM21A	exonic	177
chr11:52113252-52114115-	1	1	1	1	2	1	chr11	52113251	52114115	-	hsa_circ_1118411	circBase	NM_147156	SGMS1	exonic	854
chr11:54141549-54151151+	1	1	1	1	3	1	chr11	54141548	54151151	+	hsa_circ_1113131	circBase	NM_116258	PRKG1	exonic	559
chr11:57258697-57259335-	1	1	2	1	5	1	chr11	57258696	57259335	-	hsa_circ_1115214	circBase	NM_113627	SLC43A1	exonic	322
chr11:57449894-57529518+	1	1	1	1	1	3	chr11	57449893	57529518	+		novel	NM_111331	CTNND1	sense overlapping	79625
chr11:5751493-5756171+	1	1	1	1	6	5	chr11	5751492	5756171	+	hsa_circ_1113755	circBase	uc121pmm.1	C11orf18	sense overlapping	4678
chr11:5751493-5759713+	1	1	1	1	2	1	chr11	5751492	5759713	+	hsa_circ_1193748	circBase	uc121pmm.1	C11orf18	sense overlapping	8221
chr11:5768848-5777519+	1	1	1	1	1	4	chr11	5768847	5777519	+	hsa_circ_1193758	circBase	ENST11111328191	FAM218B	exonic	1196
chr11:5772451-5777519+	2	1	1	1	1	1	chr11	5772449	5777519	+		novel	NM_117782	FAM218B	exonic	961
chr11:5792621-5798491-	1	1	1	1	1	1	chr11	5792621	5798491	-		novel	ENST11111381127	TRIM5	intronic	5871
chr11:5811176-5842668-	1	1	1	1	3	1	chr11	5811175	5842668	-	hsa_circ_1193763	circBase	NM_111494	GDI2	exonic	946
chr11:581492-587464+	1	1	1	1	1	2	chr11	581491	587464	+	hsa_circ_1121671	circBase	NM_121911	PHRF1	exonic	441
chr11:5815815-5842668-	11	1	5	30	16	15	chr11	5815814	5842668	-	hsa_circ_1117586	circBase	NM_111494	GDI2	exonic	774
chr11:5818457-5842668-	1	1	1	1	1	3	chr11	5818456	5842668	-	hsa_circ_1117582	circBase	NM_111494	GDI2	exonic	1191
chr11:5827115-5842668-	4	1	3	12	1	12	chr11	5827114	5842668	-	hsa_circ_1115379	circBase	NM_111494	GDI2	exonic	674
chr11:5827815-5842668-	1	1	2	1	1	1	chr11	5827814	5842668	-	hsa_circ_1113351	circBase	NM_111494	GDI2	exonic	542
chr11:5836848-5842668-	4	1	11	19	4	24	chr11	5836847	5842668	-	hsa_circ_1112665	circBase	NM_111494	GDI2	exonic	343
chr11:5836899-5838811-	1	1	1	1	2	1	chr11	5836898	5838811	-		novel	NM_111494	GDI2	sense overlapping	1912
chr11:5838726-5842668-	1	1	1	1	1	3	chr11	5838725	5842668	-	hsa_circ_1112478	circBase	NM_111494	GDI2	exonic	218
chr11:58976165-58976331-	1	1	1	1	2	1	chr11	58976164	58976331	-		novel	NM_111139396	MPEG1	sense overlapping	166
chr11:58979143-58979656-	1	1	1	3	1	1	chr11	58979142	58979656	-		novel	NM_111139396	MPEG1	sense overlapping	514
chr11:58979569-58981116-	1	1	1	1	2	1	chr11	58979568	58981116	-		novel	NM_111139396	MPEG1	sense overlapping	438
chr11:59426339-59426942-	5	1	1	4	7	4	chr11	59426338	59426942	-	hsa_circ_1114162	circBase	NM_152716	PATL1	exonic	299
chr11:61133517-61135471+	3	1	5	11	11	2	chr11	61133516	61135471	+	hsa_circ_1112158	circBase	NM_116464	TMEM138	exonic	248
chr11:61139147-61142156-	1	1	1	2	1	1	chr11	61139146	61142156	-	hsa_circ_1122245	circBase	NM_152718	VWCE	exonic	291
chr11:61154118-61155112+	1	1	1	2	1	1	chr11	61154117	61155112	+		novel	NM_113211	TFAM	sense overlapping	985
chr11:61215197-61215585+	1	1	1	1	1	2	chr11	61215196	61215585	+	hsa_circ_1111311	circBase	NM_117841	SDHAF2	exonic	334
chr11:61225129-61229771+	1	1	1	3	1	1	chr11	61225128	61229771	+		novel	ENST11111345732	MS4A1	intronic	4743
chr11:61225522-61229771+	1	1	1	1	1	4	chr11	61225521	61229771	+		novel	ENST11111345732	MS4A1	intronic	4251
chr11:61369125-61461913+	1	1	1	1	1	2	chr11	61369124	61461913	+		novel	NM_111181512	BICC1	sense overlapping	92779
chr11:6139111-6154324+	1	1	1	2	1	1	chr11	6139111	6154324	+		novel	NM_132915	RBM17	exonic	874
chr11:61592283-61612461-	1	1	1	2	1	1	chr11	61592282	61612461	-	hsa_circ_1193792	circBase	NM_115436	CCDC6	exonic	279
chr11:61844361-61845111-	1	1	1	1	1	1	chr11	61844359	61845111	-	hsa_circ_1193814	circBase	NM_111149	ANK3	exonic	326
chr11:62284314-62299949-	1	1	1	1	2	1	chr11	62284313	62299949	-		novel	ENST11111257247	AHNAK	intronic	15646
chr11:62286122-62292698-	1	1	1	1	4	1	chr11	62286121	62292698	-		novel	ENST11111257247	AHNAK	intronic	6677
chr11:62287145-62287374-	1	1	1	1	1	1	chr11	62287144	62287374	-		novel	ENST11111257247	AHNAK	intronic	331
chr11:62296285-62296791-	1	1	1	1	2	1	chr11	62296284	62296791	-		novel	ENST11111257247	AHNAK	intronic	516
chr11:62296971-62297451-	1	1	1	1	2	1	chr11	62296969	62297451	-		novel	ENST11111257247	AHNAK	intronic	482
chr11:62416455-62417213-	2	1	2	3	3	2	chr11	62416454	62417213	-	hsa_circ_1118111	circBase	NM_198334	GANAB	exonic	342
chr11:62487495-62491375-	1	1	1	2	1	1	chr11	62487494	62491375	-		novel	NR_137946	HNRNPUL2-BSCL2	exonic	889
chr11:62594627-62595113-	1	1	1	1	2	1	chr11	62594626	62595113	-	hsa_circ_1122537	circBase	NM_113164	STX5	exonic	198
chr11:62621991-62622912-	2	1	1	1	1	1	chr11	62621991	62622912	-		novel	NR_112562	SNORD28	sense overlapping	922
chr11:63419418-63421147-	1	1	1	1	1	1	chr11	63419417	63421147	-	hsa_circ_1122599	circBase	NM_115459	ATL3	exonic	156
chr11:63426233-63426724-	1	1	1	3	1	1	chr11	63426232	63426724	-	hsa_circ_1122611	circBase	NM_115459	ATL3	exonic	359
chr11:63662631-63663115+	1	1	1	1	3	1	chr11	63662631	63663115	+	hsa_circ_1122614	circBase	NM_114954	MARK2	exonic	234
chr11:63671292-63671472+	1	1	2	1	1	1	chr11	63671291	63671472	+		novel	ENST11111279873	ARID5B	intronic	181
chr11:63699942-63761181+	1	1	1	1	3	1	chr11	63699941	63761181	+	hsa_circ_1115751	circBase	NM_132199	ARID5B	exonic	457
chr11:63719711-63721311+	1	1	1	1	2	1	chr11	63719719	63721311	+	hsa_circ_1122623	circBase	NM_124771	NAA41	exonic	339
chr11:63815227-63829556+	1	1	2	1	1	1	chr11	63815226	63829556	+		novel	NM_132199	ARID5B	sense overlapping	24331
chr11:63961551-63962192+	2	1	1	1	1	1	chr11	63961549	63962192	+	hsa_circ_1122631	circBase	NM_116819	STIP1	exonic	494
chr11:64453118-64453419-	1	1	1	1	1	2	chr11	64453117	64453419	-	hsa_circ_1196116	circBase	NM_115181	NRXN2	exonic	312
chr11:64627396-64627818-	1	1	1	1	2	1	chr11	64627395	64627818	-	hsa_circ_1122723	circBase	NM_116795	EHD1	exonic	413
chr11:64935482-64935713-	2	1	1	1	1	1	chr11	64935481	64935713	-		novel	ENST11111399251	JMJD1C	intronic	222
chr11:64943217-64949216-	1	1	1	1	1	2	chr11	64943216	64949216	-	hsa_circ_1193842	circBase	NM_132776	JMJD1C	exonic	793
chr11:64957171-64968995-	1	1	1	2	1	1	chr11	64957171	64968995	-		novel	NM_132776	JMJD1C	exonic	2951
chr11:65126524-65164725-	1	1	1	1	5	1	chr11	65126523	65164725	-		novel	NM_132776	JMJD1C	sense overlapping	38212
chr11:65162117-65163461+	1	1	1	1	1	2	chr11	65162116	65163461	+		novel	NM_112689	POLA2	exonic	294
chr11:65198241-65215128+	3	1	1	3	2	1	chr11	65198239	65215128	+	hsa_circ_1113812	circBase	NR_131112	NEAT1	sense overlapping	6889
chr11:65211951-65215128+	1	1	1	1	4	1	chr11	65211949	65215128	+	hsa_circ_1117185	circBase	GSE61474_TCONS_11151946	GSE61474_XLOC_111127	exonic	3179
chr11:65268156-65268321+	1	1	1	1	2	1	chr11	65268155	65268321	+		novel	NR_112819	MALAT1	sense overlapping	165
chr11:65271339-65272231+	1	1	1	1	2	1	chr11	65271338	65272231	+		novel	NR_112819	MALAT1	sense overlapping	892
chr11:65622882-65623425-	1	1	1	1	3	1	chr11	65622881	65623425	-		novel	ENST11111527752	CFL1	intronic	544
chr11:65977833-65978731+	1	1	2	1	1	1	chr11	65977832	65978731	+	hsa_circ_1118248	circBase	NM_118126	PACS1	exonic	216
chr11:6631115-6631948+	1	1	1	3	1	1	chr11	6631114	6631948	+		novel	NM_114517	ILK	sense overlapping	1834
chr11:66417171-66417594+	9	1	5	3	1	14	chr11	66417171	66417594	+	hsa_circ_1111331	circBase	NM_112896	RBM4	exonic	424	Alzheimer's disease, B-cell chronic lymphocytic leukemia, Duchenne muscular dystrophy (DMD), Oral Carcinoma, acute lymphoblastic leukemia (ALL), acute myeloid leukemia (AML), acute promyelocytic leukemia (APL), autism spectrum disorder (ASD), bladder cancer, breast cancer, cardiac hypertrophy, cervical cancer, cholangiocarcinoma, chronic lymphocytic leukemia (CLL), colorectal cancer, facioscapulo…
chr11:66424617-66428816+	1	1	1	1	4	1	chr11	66424616	66428816	+	hsa_circ_1196216	circBase	NM_111198844	RBM4	intronic	4211
chr11:66523824-66529921+	1	1	1	2	2	1	chr11	66523823	66529921	+		PMID:25171511	NM_124651	C11orf81	sense overlapping	6198
chr11:66526514-66595835+	1	1	1	3	1	1	chr11	66526513	66595835	+	hsa_circ_1196218	circBase	NM_124651	C11orf81	exonic	1199
chr11:66589114-66591145+	1	1	1	1	5	1	chr11	66589113	66591145	+	hsa_circ_1123133	circBase	NM_124651	C11orf81	exonic	233
chr11:66947551-66975159+	2	1	1	1	1	1	chr11	66947549	66975159	+	hsa_circ_1123152	circBase	NM_112318	KDM2A	exonic	444
chr11:66982811-66986874+	3	1	1	1	1	1	chr11	66982811	66986874	+	hsa_circ_1196257	circBase	NM_112318	KDM2A	exonic	471
chr11:68272613-68287119+	1	1	1	4	2	1	chr11	68272612	68287119	+	hsa_circ_1116277	circBase	NM_118312	PPP6R3	exonic	256
chr11:68272613-68312492+	1	1	1	1	1	3	chr11	68272612	68312492	+	hsa_circ_1196287	circBase	NM_118312	PPP6R3	exonic	676
chr11:68272613-68315359+	1	1	1	1	1	3	chr11	68272612	68315359	+	hsa_circ_1114449	circBase	NM_118312	PPP6R3	exonic	489
chr11:68282496-68287119+	1	1	1	1	1	4	chr11	68282495	68287119	+	hsa_circ_1196291	circBase	ENST11111528635	PPP6R3	exonic	291
chr11:68286969-68315359+	1	1	1	1	3	1	chr11	68286968	68315359	+	hsa_circ_1123224	circBase	NM_118312	PPP6R3	exonic	384
chr11:68286969-68318654+	1	1	1	3	1	1	chr11	68286968	68318654	+	hsa_circ_1196293	circBase	NM_118312	PPP6R3	exonic	775
chr11:68318589-68331911+	1	1	1	3	1	2	chr11	68318588	68331911	+	hsa_circ_1117661	circBase	NM_118312	PPP6R3	exonic	423
chr11:68334482-68343511+	1	1	1	1	1	2	chr11	68334481	68343511	+	hsa_circ_1112138	circBase	NM_111164161	PPP6R3	exonic	571
chr11:68334482-68351597+	1	1	1	2	1	1	chr11	68334481	68351597	+	hsa_circ_1123231	circBase	NM_111164161	PPP6R3	exonic	657
chr11:68351511-68363686+	1	1	1	1	1	2	chr11	68351511	68363686	+	hsa_circ_1196322	circBase	NM_111164161	PPP6R3	exonic	493
chr11:68358128-68371961+	1	1	1	1	1	3	chr11	68358127	68371961	+	hsa_circ_1196326	circBase	NM_118312	PPP6R3	exonic	721
chr11:68367819-68371961+	1	1	1	1	4	1	chr11	68367818	68371961	+	hsa_circ_1117464	circBase	NM_118312	PPP6R3	exonic	412
chr11:68369331-68371961+	1	1	1	1	2	2	chr11	68369331	68371961	+	hsa_circ_1112417	circBase	NM_118312	PPP6R3	exonic	258
chr11:68571468-68575116-	1	1	1	1	2	1	chr11	68571467	68575116	-	hsa_circ_1123276	circBase	NM_111876	CPT1A	exonic	274
chr11:6962812-6977113+	1	1	1	1	1	2	chr11	6962811	6977113	+	hsa_circ_1118338	circBase	ENST11111529913	ZNF215	exonic	415
chr11:69666547-69669199+	1	1	2	1	1	1	chr11	69666546	69669199	+		novel	NM_112238	SIRT1	exonic	415
chr11:69692354-69773943-	1	1	1	2	1	1	chr11	69692353	69773943	-	hsa_circ_1193895	circBase	NM_115611	HERC4	exonic	1931
chr11:69699345-69711862-	1	1	1	1	1	1	chr11	69699344	69711862	-	hsa_circ_1117997	circBase	NM_115611	HERC4	exonic	234
chr11:69714352-69726559-	1	1	1	1	3	1	chr11	69714351	69726559	-	hsa_circ_1193898	circBase	NM_115611	HERC4	exonic	531
chr11:69714352-69773943-	1	1	1	3	3	2	chr11	69714351	69773943	-	hsa_circ_1118478	circBase	NM_115611	HERC4	exonic	1429
chr11:69726441-69773943-	1	1	4	4	6	4	chr11	69726439	69773943	-	hsa_circ_1193916	circBase	NM_115611	HERC4	exonic	1118
chr11:69748421-69773943-	1	1	1	2	2	2	chr11	69748419	69773943	-	hsa_circ_1118484	circBase	NM_115611	HERC4	exonic	898
chr11:69748421-69814321-	1	1	1	1	2	1	chr11	69748419	69814321	-	hsa_circ_1119151	circBase	NM_115611	HERC4	exonic	1581
chr11:69785313-69814321-	1	1	2	1	2	3	chr11	69785312	69814321	-	hsa_circ_1117113	circBase	NM_115611	HERC4	exonic	682
chr11:71111412-71111788+	1	1	1	1	2	1	chr11	71111411	71111788	+		novel	NM_112217	HNRNPH3	sense overlapping	387
chr11:71115111-71123871-	1	1	1	1	3	1	chr11	71115119	71123871	-	hsa_circ_1116131	circBase	NM_117987	RUFY2	exonic	274
chr11:71141989-71145885-	1	1	1	3	3	1	chr11	71141988	71145885	-	hsa_circ_1193942	circBase	NM_117987	RUFY2	exonic	457
chr11:71143555-71145885-	2	1	2	11	2	5	chr11	71143554	71145885	-	hsa_circ_1118514	circBase	NM_117987	RUFY2	exonic	289
chr11:71143555-71154218-	3	1	1	1	1	1	chr11	71143554	71154218	-	hsa_circ_1193948	circBase	NM_117987	RUFY2	exonic	541
chr11:71148953-71154861+	1	1	1	1	1	2	chr11	71148952	71154861	+		novel	NM_111188	HK1	exonic	441
chr11:71152895-71154218-	1	1	1	1	1	2	chr11	71152894	71154218	-	hsa_circ_1111239	circBase	NM_117987	RUFY2	exonic	252	B-cell chronic lymphocytic leukemia, Hodgkin's lymphoma, Intrahepatic cholangiocarcinoma (ICC), acute lymphoblastic leukemia (ALL), acute myeloid leukemia (AML), acute promyelocytic leukemia (APL), adrenocortical carcinoma, autism spectrum disorder (ASD), bladder cancer, breast cancer, cardiac hypertrophy, chronic lymphocytic leukemia (CLL), chronic pancreatitis, colorectal cancer, epithelial ova…
chr11:71152895-71161494-	1	1	1	1	2	1	chr11	71152894	71161494	-	hsa_circ_1193951	circBase	NM_117987	RUFY2	exonic	472
chr11:71152895-71164611-	2	1	1	1	1	1	chr11	71152894	71164611	-	hsa_circ_1193952	circBase	NM_117987	RUFY2	exonic	646
chr11:71191193-71191417-	1	1	1	1	4	1	chr11	71191192	71191417	-	hsa_circ_1193965	circBase	ENST11111399181	DNA2	exonic	225
chr11:71191193-71229921-	1	1	1	4	1	1	chr11	71191192	71229921	-	hsa_circ_1193969	circBase	NR_112264	DNA2	exonic	2119
chr11:71191619-71212868-	1	1	1	1	1	2	chr11	71191618	71212868	-		novel	uc111jog.3	DNA2	exonic	763
chr11:71191619-71229921-	1	1	2	1	1	1	chr11	71191618	71229921	-	hsa_circ_1193972	circBase	uc111jog.3	DNA2	exonic	1919
chr11:71196768-71229921-	1	1	5	4	1	1	chr11	71196767	71229921	-	hsa_circ_1118524	circBase	NR_112264	DNA2	exonic	1572
chr11:71211417-71212361+	1	1	1	2	2	3	chr11	71211416	71212361	+	hsa_circ_1111337	circBase	NM_113626	PPFIA1	exonic	419	lung cancer, multiple myeloma (MM)
chr11:71211417-71218594+	1	1	1	1	1	3	chr11	71211416	71218594	+	hsa_circ_1113429	circBase	NM_113626	PPFIA1	exonic	712
chr11:71218861-71229921-	1	1	3	8	1	2	chr11	71218861	71229921	-	hsa_circ_1119172	circBase	NR_112264	DNA2	exonic	645
chr11:71219785-71225569-	1	1	1	1	2	1	chr11	71219784	71225569	-	hsa_circ_1193981	circBase	NR_112264	DNA2	exonic	498
chr11:71227881-71229921-	7	1	3	19	3	1	chr11	71227879	71229921	-	hsa_circ_1116151	circBase	NR_112264	DNA2	exonic	367
chr11:71243447-71258152+	1	1	1	1	1	2	chr11	71243446	71258152	+	hsa_circ_1194161	circBase	NM_112339	TSPAN15	exonic	474
chr11:71246911-71253327-	2	1	1	1	3	1	chr11	71246911	71253327	-	hsa_circ_1113459	circBase	NM_152717	SLC25A16	exonic	421
chr11:71246911-71263452-	1	1	1	1	3	1	chr11	71246911	71263452	-	hsa_circ_1112624	circBase	NM_152717	SLC25A16	exonic	485
chr11:71246911-71266475-	1	1	1	2	1	1	chr11	71246911	71266475	-	hsa_circ_1117778	circBase	NM_152717	SLC25A16	exonic	619
chr11:71252889-71256269-	1	1	2	1	1	1	chr11	71252888	71256269	-		novel	NM_152717	SLC25A16	sense overlapping	3381
chr11:71414455-71412351+	1	1	1	2	1	1	chr11	71414454	71412351	+	hsa_circ_1193998	circBase	NM_131625	TET1	exonic	2493
chr11:71414455-71416762+	1	1	2	1	1	1	chr11	71414454	71416762	+	hsa_circ_1193996	circBase	NM_131625	TET1	exonic	2318
chr11:71497612-71512326+	2	1	1	1	1	1	chr11	71497611	71512326	+	hsa_circ_1116272	circBase	NM_118237	CCAR1	exonic	272
chr11:71514436-71517134+	1	1	1	1	2	1	chr11	71514435	71517134	+		novel	NM_118237	CCAR1	sense overlapping	2699
chr11:71545893-71546449+	2	1	1	4	8	4	chr11	71545892	71546449	+	hsa_circ_1112371	circBase	NM_118237	CCAR1	exonic	231
chr11:71545893-71549672+	1	1	1	1	1	1	chr11	71545892	71549672	+	hsa_circ_1194129	circBase	NM_118237	CCAR1	exonic	743
chr11:71547684-71548185+	1	1	1	3	1	1	chr11	71547683	71548185	+	hsa_circ_1112681	circBase	NM_118237	CCAR1	exonic	317
chr11:71547917-71548185+	1	1	1	1	1	2	chr11	71547916	71548185	+		novel	NM_118237	CCAR1	sense overlapping	179
chr11:71644548-71666787-	1	1	1	1	1	3	chr11	71644547	71666787	-	hsa_circ_1196364	circBase	NM_112319	SHANK2	exonic	613
chr11:71679588-71717924+	1	1	1	1	1	2	chr11	71679587	71717924	+		novel	NM_124145	DDX51	sense overlapping	28337
chr11:71681634-71693961+	1	1	1	1	3	1	chr11	71681633	71693961	+		novel	ENST11111525243	RNF121	intronic	13328
chr11:71693817-71694816+	1	1	1	1	1	1	chr11	71693816	71694816	+		novel	ENST11111525243	RNF121	intronic	1111
chr11:71693817-71711763+	1	1	1	2	1	1	chr11	71693816	71711763	+	hsa_circ_1123419	circBase	NM_118321	RNF121	exonic	384
chr11:71696692-71713113+	1	1	1	1	1	2	chr11	71696691	71713113	+	hsa_circ_1117197	circBase	NM_124145	DDX51	exonic	341
chr11:71719562-71726959+	1	1	1	1	3	1	chr11	71719561	71726959	+		novel	NM_114728	DDX21	exonic	1113
chr11:71719647-71719964+	1	1	1	2	1	1	chr11	71719646	71719964	+		novel	NM_114728	DDX21	sense overlapping	318
chr11:71723147-71726959+	5	1	1	2	1	2	chr11	71723146	71726959	+	hsa_circ_1118523	circBase	NM_114728	DDX21	exonic	483
chr11:71723147-71728877+	1	1	1	1	1	3	chr11	71723146	71728877	+	hsa_circ_1194145	circBase	NM_114728	DDX21	exonic	629
chr11:71726774-71737444+	1	1	1	2	1	1	chr11	71726773	71737444	+		novel	NM_114728	DDX21	exonic	998
chr11:71822213-71823812-	2	1	1	1	1	1	chr11	71822212	71823812	-		novel	NM_114142	ANAPC15	sense overlapping	1611
chr11:71899111-71899897-	1	1	1	2	1	1	chr11	71899119	71899897	-		novel	NM_173555	TYSND1	sense overlapping	788
chr11:71968961-71978573-	1	1	2	1	1	1	chr11	71968961	71978573	-	hsa_circ_1194174	circBase	NM_121129	PPA1	exonic	612
chr11:7231586-7269899-	1	1	1	2	1	1	chr11	7231585	7269899	-	hsa_circ_1117616	circBase	NM_111118139	SFMBT2	exonic	688
chr11:72578911-72611991-	3	1	1	4	7	2	chr11	72578919	72611991	-	hsa_circ_1123475	circBase	NM_114824	FCHSD2	exonic	384
chr11:72598515-72611991-	3	1	1	3	4	3	chr11	72598514	72611991	-	hsa_circ_1117195	circBase	NM_114824	FCHSD2	exonic	222
chr11:72598515-72613683-	1	1	1	1	1	4	chr11	72598514	72613683	-	hsa_circ_1115527	circBase	NM_114824	FCHSD2	exonic	318
chr11:72613114-72613636+	1	1	1	1	4	1	chr11	72613113	72613636	+		novel	ENST11111299297	SGPL1	intronic	523
chr11:72614231-72611967+	1	1	1	1	2	1	chr11	72614229	72611967	+	hsa_circ_1194181	circBase	NM_113911	SGPL1	exonic	234
chr11:72614231-72619256+	1	1	1	1	2	1	chr11	72614229	72619256	+	hsa_circ_1114977	circBase	NM_113911	SGPL1	exonic	588
chr11:7262373-7269899-	2	1	1	2	1	1	chr11	7262372	7269899	-	hsa_circ_1117625	circBase	NM_111118139	SFMBT2	exonic	211
chr11:7262373-7318951-	4	1	1	1	2	1	chr11	7262372	7318951	-	hsa_circ_1117627	circBase	NM_111118139	SFMBT2	exonic	558
chr11:7262373-7327916-	1	1	1	3	1	1	chr11	7262372	7327916	-	hsa_circ_1117628	circBase	NM_111118139	SFMBT2	exonic	894
chr11:72695133-72711142-	9	1	8	15	4	8	chr11	72695132	72711142	-	hsa_circ_1115918	circBase	NM_114824	FCHSD2	exonic	318
chr11:72695133-72712179-	1	1	1	2	1	1	chr11	72695132	72712179	-	hsa_circ_1196392	circBase	NM_114824	FCHSD2	exonic	463
chr11:7269817-7327916-	1	1	1	2	1	1	chr11	7269816	7327916	-	hsa_circ_1117632	circBase	NM_111118139	SFMBT2	exonic	767
chr11:7285521-7291611-	1	1	1	1	2	1	chr11	7285519	7291611	-	hsa_circ_1117634	circBase	NM_111118139	SFMBT2	exonic	251
chr11:7285521-7318951-	1	1	1	2	1	1	chr11	7285519	7318951	-	hsa_circ_1117635	circBase	NM_111118139	SFMBT2	exonic	348
chr11:7285521-7327916-	3	1	1	13	5	5	chr11	7285519	7327916	-	hsa_circ_1117636	circBase	NM_111118139	SFMBT2	exonic	684
chr11:73141735-73179537-	1	1	1	1	1	2	chr11	73141734	73179537	-	hsa_circ_1123498	circBase	NM_111286151	FAM168A	exonic	169
chr11:7318854-7327916-	4	3	6	97	65	55	chr11	7318853	7327916	-	hsa_circ_1111211	circBase	NM_111118139	SFMBT2	exonic	434
chr11:7325866-7327916-	2	1	1	4	1	1	chr11	7325865	7327916	-	hsa_circ_1117643	circBase	NM_111118139	SFMBT2	exonic	336
chr11:73418465-73427391-	1	1	1	3	1	1	chr11	73418464	73427391	-		novel	ENST11111541771	RAB6A	intronic	8926
chr11:73418465-73429763-	1	1	2	4	6	1	chr11	73418464	73429763	-	hsa_circ_1111339	circBase	NM_198896	RAB6A	exonic	312	Alzheimer's disease, B-cell chronic lymphocytic leukemia, Duchenne muscular dystrophy (DMD), Oral Carcinoma, PFV-1 infection, acute myeloid leukemia (AML), acute promyelocytic leukemia (APL), autism spectrum disorder (ASD), breast cancer, chronic lymphocytic leukemia (CLL), colorectal cancer, glioblastoma, glioma, hepatocellular carcinoma (HCC), lung cancer, multiple myeloma (MM), nemaline myopat…
chr11:73418465-73429935-	1	1	1	1	1	1	chr11	73418464	73429935	-	hsa_circ_1114596	circBase	NM_112869	RAB6A	exonic	312
chr11:73418465-73431944-	1	1	1	2	1	3	chr11	73418464	73431944	-	hsa_circ_1113918	circBase	NM_112869	RAB6A	exonic	366
chr11:73621444-73631177+	1	1	1	1	2	1	chr11	73621443	73631177	+	hsa_circ_1118119	circBase	NM_125155	PAAF1	exonic	486
chr11:73723623-73817538-	1	1	1	1	1	2	chr11	73723622	73817538	-	hsa_circ_1196417	circBase	NM_115531	C2CD3	sense overlapping	93916
chr11:73829273-73829427-	1	1	1	1	1	2	chr11	73829272	73829427	-	hsa_circ_1123554	circBase	NM_115531	C2CD3	exonic	155
chr11:73843889-73844612-	1	1	2	1	1	1	chr11	73843888	73844612	-	hsa_circ_1123558	circBase	NM_115531	C2CD3	exonic	262
chr11:73887841-73892939-	2	1	1	2	1	1	chr11	73887839	73892939	-	hsa_circ_1118195	circBase	NR_145564	ASCC1	exonic	211
chr11:73956569-73956747-	1	1	1	1	1	2	chr11	73956568	73956747	-	hsa_circ_1118735	circBase	NR_145564	ASCC1	exonic	179
chr11:73956569-73963282-	1	1	2	1	1	1	chr11	73956568	73963282	-	hsa_circ_1118736	circBase	NR_145564	ASCC1	exonic	277
chr11:73956569-73976692-	2	1	1	1	1	1	chr11	73956568	73976692	-		novel	NR_145564	ASCC1	sense overlapping	21124
chr11:74111547-74111928-	1	1	2	1	1	3	chr11	74111546	74111928	-	hsa_circ_1118662	circBase	NM_117626	DNAJB12	exonic	266
chr11:7412243-7423911-	1	1	1	2	1	1	chr11	7412242	7423911	-	hsa_circ_1117649	circBase	NM_111118139	SFMBT2	exonic	246
chr11:7415841-7423911-	1	1	1	1	1	2	chr11	7415839	7423911	-	hsa_circ_1111212	circBase	NM_111118139	SFMBT2	sense overlapping	18172	B-cell chronic lymphocytic leukemia, Cerebellar neurodegeneration, Hodgkin's lymphoma, Intrahepatic cholangiocarcinoma (ICC), acute lymphoblastic leukemia (ALL), acute myeloid leukemia (AML), acute promyelocytic leukemia (APL), adrenocortical carcinoma, autism spectrum disorder (ASD), bladder cancer, breast cancer, cardiac hypertrophy, cervical cancer, chronic lymphocytic leukemia (CLL), chronic …
chr11:7419611-7412337-	1	1	1	1	2	1	chr11	7419611	7412337	-	hsa_circ_1117647	circBase	NM_111118139	SFMBT2	exonic	336
chr11:7419611-7423911-	1	1	1	1	1	1	chr11	7419611	7423911	-	hsa_circ_1117648	circBase	NM_111118139	SFMBT2	exonic	487
chr11:74322653-74326552-	1	1	1	1	1	5	chr11	74322652	74326552	-	hsa_circ_1116628	circBase	NM_116177	MICU1	exonic	331
chr11:74474869-74475661+	1	1	1	1	2	1	chr11	74474868	74475661	+	hsa_circ_1111247	circBase	NR_173162	MCU	exonic	165	Alzheimer's disease, B-cell chronic lymphocytic leukemia, Duchenne muscular dystrophy (DMD), Hodgkin's lymphoma, Intrahepatic cholangiocarcinoma (ICC), acute lymphoblastic leukemia (ALL), acute myeloid leukemia (AML), acute promyelocytic leukemia (APL), adrenocortical carcinoma, autism spectrum disorder (ASD), bladder cancer, breast cancer, cardiac hypertrophy, chronic lymphocytic leukemia (CLL),…
chr11:74511671-74528759+	1	1	1	1	1	1	chr11	74511671	74528759	+	hsa_circ_1116715	circBase	NM_111198638	RNF169	exonic	341
chr11:74521229-74528759+	1	1	1	1	4	1	chr11	74521228	74528759	+	hsa_circ_1113216	circBase	NM_111198638	RNF169	exonic	266
chr11:74571213-74574166-	1	1	3	1	1	2	chr11	74571212	74574166	-	hsa_circ_1196442	circBase	NM_182969	XRRA1	exonic	167
chr11:74676179-74681744+	1	1	1	1	1	3	chr11	74676178	74681744	+		novel	NM_114752	SPCS2	exonic	381
chr11:74791129-74813348-	1	1	1	2	1	1	chr11	74791128	74813348	-	hsa_circ_1194122	circBase	NM_111142596	P4HA1	exonic	785
chr11:74791129-74828741-	1	1	1	2	1	1	chr11	74791128	74828741	-	hsa_circ_1118767	circBase	NM_111142596	P4HA1	exonic	923
chr11:74916133-74923718-	1	1	1	1	3	1	chr11	74916132	74923718	-		novel	NM_117265	ECD	exonic	613
chr11:74942718-74943334-	1	1	1	1	2	1	chr11	74942717	74943334	-		novel	ENST11111469143	DNAJC9	sense overlapping	617
chr11:74994548-75117791-	1	1	1	2	1	1	chr11	74994547	75117791	-		novel	NM_115191	DNAJC9	sense overlapping	13244
chr11:75132514-75136546+	1	1	1	2	1	1	chr11	75132513	75136546	+		novel	NR_138373	DNAJC9-AS1	sense overlapping	4133
chr11:75147447-75148172-	1	1	1	1	3	1	chr11	75147446	75148172	-	hsa_circ_1118813	circBase	NM_111156	ANXA7	exonic	198
chr11:75216251-75227436-	1	1	1	1	1	2	chr11	75216249	75227436	-		PMID:25242744	NM_121132	PPP3CB	exonic	286
chr11:75264618-75265184-	1	1	1	1	1	1	chr11	75264617	75265184	-	hsa_circ_1118818	circBase	NM_152586	USP54	exonic	261
chr11:75331179-75336119-	1	1	1	4	1	1	chr11	75331178	75336119	-	hsa_circ_1117221	circBase	ENST11111319786	USP54	exonic	821
chr11:75335271-75336379-	1	1	1	1	1	1	chr11	75335269	75336379	-	hsa_circ_1194168	circBase	NM_152586	USP54	sense overlapping	1111
chr11:75464744-75481262-	1	1	1	2	1	1	chr11	75464743	75481262	-	hsa_circ_1118845	circBase	NR_126592	BMS1P4	exonic	778
chr11:75478918-75481262-	1	1	1	2	1	1	chr11	75478917	75481262	-	hsa_circ_1113397	circBase	NR_126592	BMS1P4	exonic	415
chr11:75562928-75623183+	1	1	1	1	1	2	chr11	75562927	75623183	+	hsa_circ_1196459	circBase	NM_113369	UVRAG	exonic	476
chr11:75591923-75623183+	3	1	1	4	2	2	chr11	75591922	75623183	+	hsa_circ_1123637	circBase	NM_113369	UVRAG	exonic	323
chr11:75622998-75672593+	1	1	2	1	1	1	chr11	75622997	75672593	+		novel	NM_113369	UVRAG	exonic	192
chr11:75715149-75728124+	1	1	1	2	1	1	chr11	75715148	75728124	+	hsa_circ_1196463	circBase	NM_113369	UVRAG	exonic	411
chr11:75727859-75728124+	1	1	1	1	1	2	chr11	75727858	75728124	+	hsa_circ_1123642	circBase	NM_113369	UVRAG	exonic	166
chr11:75831428-75832611+	1	1	1	1	1	1	chr11	75831427	75832611	+	hsa_circ_1117797	circBase	NM_113373	VCL	exonic	383
chr11:7614363-7631653+	1	1	1	2	1	1	chr11	7614362	7631653	+	hsa_circ_1116891	circBase	NM_113621	PPFIBP2	exonic	339
chr11:76153899-76158337+	1	1	1	2	1	1	chr11	76153898	76158337	+	hsa_circ_1119121	circBase	NM_111123	ADK	exonic	282
chr11:76169227-76175124+	1	1	2	1	1	1	chr11	76169226	76175124	+	hsa_circ_1123644	circBase	NM_121193	C11orf31	exonic	586
chr11:76169227-76183884+	1	1	1	1	1	1	chr11	76169226	76183884	+		novel	NM_121193	C11orf31	exonic	863
chr11:76172111-76177116-	1	1	1	1	1	1	chr11	76171999	76177116	-		novel	NM_114715	PRKRIR	exonic	229
chr11:76174425-76158337+	1	1	4	5	1	1	chr11	76174424	76158337	+	hsa_circ_1118894	circBase	NM_111123	ADK	exonic	361
chr11:76224431-76239511+	1	1	1	2	1	3	chr11	76224429	76239511	+	hsa_circ_1118189	circBase	NM_121193	C11orf31	exonic	831
chr11:76349141-76361251+	1	1	1	1	1	2	chr11	76349139	76361251	+	hsa_circ_1118911	circBase	NM_111123	ADK	exonic	151
chr11:76598441-76613236+	1	1	1	1	5	1	chr11	76598441	76613236	+	hsa_circ_1115164	circBase	NM_112331	KAT6B	exonic	949
chr11:76737174-76785117+	1	1	2	1	1	1	chr11	76737173	76785117	+		novel	NM_112331	KAT6B	exonic	1671
chr11:76919483-76919848+	1	1	1	1	3	1	chr11	76919482	76919848	+		novel	NM_111261	MYO7A	sense overlapping	366
chr11:76978821-76979114+	1	1	1	4	1	1	chr11	76978821	76979114	+	hsa_circ_1117335	circBase	NM_113375	VDAC2	exonic	216
chr11:77331651-77336863-	4	1	7	6	5	4	chr11	77331651	77336863	-	hsa_circ_1123694	circBase	NM_111293	CLNS1A	exonic	474
chr11:77331651-77341944-	1	1	5	1	1	1	chr11	77331651	77341944	-	hsa_circ_1118342	circBase	NM_111293	CLNS1A	exonic	611
chr11:77333545-77341944-	1	1	1	1	1	2	chr11	77333544	77341944	-	hsa_circ_1123696	circBase	NM_111293	CLNS1A	exonic	521
chr11:77336118-77336863-	5	1	4	3	4	4	chr11	77336117	77336863	-	hsa_circ_1111343	circBase	NM_111293	CLNS1A	exonic	211
chr11:77336118-77341944-	1	1	3	2	1	1	chr11	77336117	77341944	-	hsa_circ_1114593	circBase	NM_111293	CLNS1A	exonic	347
chr11:77383187-77414656-	1	1	2	1	1	1	chr11	77383186	77414656	-	hsa_circ_1123711	circBase	NM_116578	RSF1	exonic	1136
chr11:77394755-77414656-	18	1	11	7	38	11	chr11	77394754	77414656	-	hsa_circ_1111344	circBase	NM_116578	RSF1	exonic	351	Cerebellar neurodegeneration, Waldenstrom Macroglobulinemia (WM), breast cancer, cardiac hypertrophy, cardiomyopathy, colorectal cancer, coronary artery disease, endometrial cancer, epithelial ovarian cancer (EOC), heart failure, hepatocellular carcinoma (HCC), kidney cancer, lung cancer, malignant melanoma, myeloproliferative disorder, myocardial infarction, non-alcoholic fatty liver disease (NA…
chr11:77396151-77414656-	2	1	4	2	2	2	chr11	77396149	77414656	-	hsa_circ_1112291	circBase	NM_116578	RSF1	exonic	241
chr11:77412214-77414656-	1	1	1	1	6	2	chr11	77412213	77414656	-	hsa_circ_1114831	circBase	NM_116578	RSF1	exonic	185
chr11:77433111-77436744-	1	1	1	1	1	1	chr11	77433199	77436744	-	hsa_circ_1196513	circBase	ENST11111534794	RSF1	intronic	3645
chr11:77666988-77672184-	1	1	1	1	2	1	chr11	77666987	77672184	-	hsa_circ_1123746	circBase	NM_133547	INTS4	exonic	447
chr11:77824932-77825438-	2	1	2	20	33	18	chr11	77824931	77825438	-	hsa_circ_1123785	circBase	NM_124179	ALG8	exonic	231
chr11:77831228-77832221-	1	1	2	1	1	1	chr11	77831227	77832221	-	hsa_circ_1118119	circBase	NM_124179	ALG8	exonic	178
chr11:77831228-77838482-	1	1	1	2	1	1	chr11	77831227	77838482	-		PMID:25242744	NM_124179	ALG8	exonic	451
chr11:78176922-78189729-	1	1	1	2	1	1	chr11	78176921	78189729	-	hsa_circ_1123816	circBase	NM_124678	NARS2	exonic	342
chr11:78181293-78214241-	1	1	1	1	2	1	chr11	78181292	78214241	-	hsa_circ_1123812	circBase	NM_124678	NARS2	exonic	337
chr11:78189484-78214241-	1	1	1	1	3	1	chr11	78189483	78214241	-	hsa_circ_1196527	circBase	NM_124678	NARS2	exonic	271
chr11:78239888-78282489-	1	1	1	1	1	2	chr11	78239887	78282489	-	hsa_circ_1123814	circBase	NM_124678	NARS2	exonic	548
chr11:7839111-7844817+	11	1	12	41	43	28	chr11	7839119	7844817	+	hsa_circ_1117292	circBase	NM_115174	ATP5C1	exonic	799
chr11:78433713-78449615-	1	1	1	1	2	1	chr11	78433712	78449615	-	hsa_circ_1123824	circBase	NM_111198816	TENM4	exonic	1144
chr11:78669724-78729825-	1	1	1	1	1	2	chr11	78669723	78729825	-	hsa_circ_1118918	circBase	NM_112247	KCNMA1	exonic	881
chr11:78714531-78729825-	2	1	1	5	11	7	chr11	78714531	78729825	-	hsa_circ_1116561	circBase	NM_112247	KCNMA1	exonic	636
chr11:78832855-78851268-	1	1	1	1	1	2	chr11	78832854	78851268	-	hsa_circ_1118922	circBase	NM_112247	KCNMA1	exonic	526
chr11:79118476-79131495-	1	1	1	1	1	1	chr11	79118475	79131495	-		novel	NM_111271518	KCNMA1	intronic	13121
chr11:79119323-79111114-	1	1	1	1	1	5	chr11	79119322	79111114	-	hsa_circ_1118766	circBase	NM_112247	KCNMA1	sense overlapping	1692
chr11:79346175-79347629-	1	1	1	1	1	2	chr11	79346174	79347629	-	hsa_circ_1112833	circBase	NM_111271518	KCNMA1	intronic	1555
chr11:79613112-79614128-	1	1	1	1	4	1	chr11	79613111	79614128	-	hsa_circ_1116649	circBase	NM_114747	DLG5	exonic	328
chr11:79739899-79767624-	1	1	1	1	1	1	chr11	79739898	79767624	-		novel	NM_117155	POLR3A	exonic	2115
chr11:79741912-79744156-	1	1	1	1	2	1	chr11	79741911	79744156	-	hsa_circ_1117311	circBase	NM_117155	POLR3A	exonic	517
chr11:8113683-8116872+	1	1	1	2	1	1	chr11	8113682	8116872	+		novel	NM_113754	EIF3F	sense overlapping	3191
chr11:811445-812396-	1	1	2	1	1	1	chr11	811444	812396	-		novel	NM_145886	PIDD1	exonic	518
chr11:8158925-8174971-	1	1	1	1	1	1	chr11	8158924	8174971	-	hsa_circ_1196555	circBase	NR_145415	RIC3	exonic	446
chr11:81813152-81813342-	1	1	1	1	2	1	chr11	81813151	81813342	-	hsa_circ_1118973	circBase	NR_127428	TMEM254-AS1	exonic	191
chr11:82561191-82564321-	1	1	1	1	1	2	chr11	82561191	82564321	-	hsa_circ_1196557	circBase	NM_115141	PRCP	exonic	612
chr11:82561191-82571159-	1	1	1	2	1	1	chr11	82561191	82571159	-	hsa_circ_1196558	circBase	NM_115141	PRCP	exonic	753
chr11:82694664-82695615+	1	1	1	1	1	1	chr11	82694663	82695615	+		novel	NM_114488	RAB31	antisense	952
chr11:82822155-82828239-	1	1	3	1	4	1	chr11	82822154	82828239	-	hsa_circ_1111346	circBase	ENST11111525775	RP11-113K21.2	sense overlapping	6185	Alzheimer's disease, PFV-1 infection, acute myeloid leukemia (AML), colorectal cancer, hepatocellular carcinoma (HCC), lung cancer, multiple myeloma (MM), pancreatic cancer, prostate cancer, testicular germ cell tumor, uterine leiomyoma (ULM)
chr11:82874721-82875443+	1	1	2	1	1	1	chr11	82874721	82875443	+	hsa_circ_1196565	circBase	NM_115885	PCF11	exonic	384
chr11:82878179-82878249+	1	1	1	1	1	2	chr11	82878178	82878249	+		novel	NM_115885	PCF11	sense overlapping	171
chr11:82971476-82971756-	1	1	1	1	1	1	chr11	82971475	82971756	-		novel	NM_121825	CCDC91B	sense overlapping	1281
chr11:82984691-82989872-	1	1	2	1	1	3	chr11	82984689	82989872	-	hsa_circ_1196576	circBase	NM_121825	CCDC91B	exonic	374
chr11:82989769-82991313-	1	1	1	2	1	2	chr11	82989768	82991313	-	hsa_circ_1123865	circBase	NM_121825	CCDC91B	exonic	224
chr11:8435142-8486369-	1	1	1	2	1	1	chr11	8435141	8486369	-	hsa_circ_1196614	circBase	NM_111289158	STK33	exonic	1115
chr11:8435142-8496613-	1	1	3	1	1	1	chr11	8435141	8496613	-	hsa_circ_1196615	circBase	ENST11111315214	STK33	exonic	1515
chr11:8457141-8486369-	3	1	1	1	1	1	chr11	8457141	8486369	-	hsa_circ_1121189	circBase	NM_111289158	STK33	exonic	817
chr11:85685751-85692271-	1	1	1	1	1	2	chr11	85685751	85692271	-	hsa_circ_1123883	circBase	NM_117166	PICALM	exonic	265
chr11:85685751-85695116-	3	1	4	5	3	1	chr11	85685751	85695116	-	hsa_circ_1116629	circBase	NM_117166	PICALM	exonic	536
chr11:85692172-85693131-	1	1	2	1	1	1	chr11	85692171	85693131	-	hsa_circ_1196646	circBase	uc111rtk.2	PICALM	exonic	248
chr11:85692172-85693146-	1	1	1	1	1	2	chr11	85692171	85693146	-	hsa_circ_1123911	circBase	NM_117166	PICALM	exonic	263
chr11:85692172-85695116-	1	1	1	1	1	1	chr11	85692171	85695116	-	hsa_circ_1113695	circBase	NM_117166	PICALM	exonic	371
chr11:85692172-85711442-	1	1	1	1	2	1	chr11	85692171	85711442	-	hsa_circ_1123911	circBase	NM_117166	PICALM	exonic	521
chr11:85692172-85718626-	1	1	2	1	1	1	chr11	85692171	85718626	-	hsa_circ_1196648	circBase	NM_117166	PICALM	exonic	1114
chr11:85692172-85742653-	1	1	1	2	1	1	chr11	85692171	85742653	-	hsa_circ_1123913	circBase	NM_117166	PICALM	exonic	1649
chr11:85692788-85693146-	1	1	1	1	1	2	chr11	85692787	85693146	-	hsa_circ_1123914	circBase	NM_117166	PICALM	exonic	163
chr11:85692788-85717972-	1	1	1	2	1	2	chr11	85692787	85717972	-	hsa_circ_1112264	circBase	NM_117166	PICALM	exonic	525
chr11:85711293-85742653-	2	1	1	1	2	1	chr11	85711292	85742653	-	hsa_circ_1123918	circBase	NM_117166	PICALM	exonic	1278
chr11:85711686-85742653-	1	1	1	1	2	1	chr11	85711685	85742653	-	hsa_circ_1123928	circBase	NM_117166	PICALM	exonic	1124
chr11:85717869-85712211-	1	1	1	1	1	4	chr11	85717868	85712211	-	hsa_circ_1112513	circBase	NM_117166	PICALM	exonic	365
chr11:85717869-85714494-	1	1	1	6	11	9	chr11	85717868	85714494	-	hsa_circ_1123919	circBase	NM_117166	PICALM	exonic	451
chr11:85717869-85718626-	1	1	1	2	1	1	chr11	85717868	85718626	-	hsa_circ_1123921	circBase	NM_117166	PICALM	exonic	493
chr11:85717869-85742653-	4	1	1	11	3	2	chr11	85717868	85742653	-	hsa_circ_1123923	circBase	NM_117166	PICALM	exonic	1128
chr11:85718585-85742653-	1	1	1	1	1	6	chr11	85718584	85742653	-	hsa_circ_1123936	circBase	NM_117166	PICALM	exonic	677
chr11:85722173-85742653-	4	1	6	3	2	5	chr11	85722172	85742653	-	hsa_circ_1111347	circBase	NM_117166	PICALM	exonic	635	Alzheimer's disease, B-cell chronic lymphocytic leukemia, Cerebellar neurodegeneration, Duchenne muscular dystrophy (DMD), Oral Carcinoma, acute lymphoblastic leukemia (ALL), acute myeloid leukemia (AML), acute promyelocytic leukemia (APL), autism spectrum disorder (ASD), bladder cancer, breast cancer, cardiac hypertrophy, cervical cancer, chronic lymphocytic leukemia (CLL), colorectal cancer, en…
chr11:85723324-85742653-	1	1	1	1	1	2	chr11	85723323	85742653	-	hsa_circ_1123941	circBase	NM_117166	PICALM	exonic	528
chr11:85733411-85742653-	1	1	1	1	1	3	chr11	85733419	85742653	-	hsa_circ_1123942	circBase	NM_117166	PICALM	exonic	322
chr11:85737334-85742653-	1	1	1	2	1	1	chr11	85737333	85742653	-	hsa_circ_1112433	circBase	NM_117166	PICALM	exonic	219
chr11:85961338-85963282+	1	1	1	2	1	1	chr11	85961337	85963282	+	hsa_circ_1118999	circBase	NM_113797	EED	exonic	246
chr11:86117287-86117524+	1	1	1	1	3	1	chr11	86117286	86117524	+	hsa_circ_1123956	circBase	NM_116411	C11orf73	exonic	238
chr11:86131771-86133571+	2	1	3	1	1	2	chr11	86131769	86133571	+	hsa_circ_1118992	circBase	NM_118999	CCSER2	exonic	1653
chr11:86177527-86185649+	28	1	11	7	27	11	chr11	86177526	86185649	+	hsa_circ_1116956	circBase	NM_118999	CCSER2	exonic	254
chr11:86177527-86198463+	6	1	1	5	11	3	chr11	86177526	86198463	+	hsa_circ_1113118	circBase	NM_118999	CCSER2	exonic	451
chr11:86191779-86237421+	1	1	1	1	1	2	chr11	86191778	86237421	+	hsa_circ_1194298	circBase	NM_118999	CCSER2	sense overlapping	45642
chr11:86198268-86237421+	3	1	5	3	6	2	chr11	86198267	86237421	+	hsa_circ_1118998	circBase	NM_118999	CCSER2	exonic	457
chr11:86223689-86237421+	1	1	2	1	1	1	chr11	86223688	86237421	+	hsa_circ_1194311	circBase	NM_118999	CCSER2	exonic	261
chr11:86778736-86782657+	1	1	1	2	1	1	chr11	86778735	86782657	+	hsa_circ_1123971	circBase	NM_122918	TMEM135	exonic	221
chr11:86778736-86812437+	1	1	1	1	1	2	chr11	86778735	86812437	+	hsa_circ_1118359	circBase	NM_122918	TMEM135	exonic	255
chr11:86868383-86869813+	1	1	1	1	1	1	chr11	86868382	86869813	+	hsa_circ_1196693	circBase	NM_111168724	TMEM135	intronic	1431
chr11:87581627-87612331+	1	1	4	1	1	1	chr11	87581626	87612331	+		novel	TCONS_11119425	XLOC_119243	sense overlapping	31714
chr11:88211724-88221144-	1	1	2	1	1	1	chr11	88211723	88221144	-	hsa_circ_1119115	circBase	NM_115145	WAPL	exonic	744
chr11:88211724-88233731-	1	1	1	2	1	1	chr11	88211723	88233731	-	hsa_circ_1119116	circBase	NM_115145	WAPL	exonic	1471
chr11:88218746-88233731-	1	1	1	1	1	2	chr11	88218745	88233731	-	hsa_circ_1194319	circBase	NM_115145	WAPL	exonic	1113
chr11:88227136-88231861-	1	1	1	1	1	1	chr11	88227135	88231861	-		novel	NM_115145	WAPAL	exonic	341
chr11:88818917-88822592-	1	1	1	1	3	1	chr11	88818916	88822592	-	hsa_circ_1119134	circBase	NM_115271	GLUD1	exonic	661
chr11:88911117-88931731+	4	1	1	1	1	1	chr11	88911116	88931731	+		novel	NM_119154	FAM35A	exonic	1968
chr11:89527431-89536184-	1	1	1	2	1	1	chr11	89527429	89536184	-	hsa_circ_1117229	circBase	NM_132811	ATAD1	exonic	248
chr11:89624211-89693118+	1	1	1	1	3	1	chr11	89624211	89693118	+	hsa_circ_1112232	circBase	NM_111314	PTEN	sense overlapping	68798
chr11:89624211-89712116+	1	1	1	1	1	2	chr11	89624211	89712116	+		novel	NM_111314	PTEN	sense overlapping	87816
chr11:8987451-8989588+	2	10	10	4	1	1	chr11	8987451	8989588	+	hsa_circ_1196714	circBase	NR_173431	TMEM9B-AS1	exonic	461
chr11:91174223-91122482-	1	1	1	1	2	1	chr11	91174222	91122482	-		novel	NM_118363	RNLS	exonic	351
chr11:91469684-91477479+	2	5	7	17	12	10	chr11	91469683	91477479	+		novel	NM_116195	KIF21B	exonic	921
chr11:91653628-91665417+	1	1	1	1	1	2	chr11	91653627	91665417	+	hsa_circ_1118629	circBase	NM_121799	STAMBPL1	sense overlapping	11791
chr11:91661413-91665417+	1	1	2	1	1	1	chr11	91661412	91665417	+	hsa_circ_1194349	circBase	NM_121799	STAMBPL1	exonic	311
chr11:9181815-9182412-	3	1	1	1	1	1	chr11	9181814	9182412	-	hsa_circ_1115179	circBase	NM_115213	DENND5A	sense overlapping	618
chr11:919683-911211-	1	1	1	2	1	1	chr11	919682	911211	-	hsa_circ_1117412	circBase	NM_115155	LARP4B	exonic	289
chr11:919683-931711-	1	1	1	2	1	1	chr11	919682	931711	-	hsa_circ_1115772	circBase	NM_115155	LARP4B	exonic	469
chr11:931387-931711-	1	1	1	2	1	1	chr11	931386	931711	-	hsa_circ_1114212	circBase	NM_115155	LARP4B	exonic	181
chr11:93185138-93221941+	1	1	1	1	1	2	chr11	93185137	93221941	+	hsa_circ_1117168	circBase	NR_114291	HECTD2	exonic	462
chr11:93399848-93412936+	1	1	1	1	5	1	chr11	93399847	93412936	+		novel	NM_133395	CEP295	exonic	554
chr11:93429486-93433352+	1	1	2	1	1	2	chr11	93429485	93433352	+	hsa_circ_1196775	circBase	NM_133395	CEP295	exonic	3613
chr11:93458817-93461813+	1	1	1	2	1	1	chr11	93458816	93461813	+	hsa_circ_1196784	circBase	NM_133395	CEP295	exonic	843
chr11:93523741-93527211+	1	1	1	2	1	1	chr11	93523739	93527211	+	hsa_circ_1111349	circBase	NM_114268	MED17	exonic	442	Alzheimer's disease, B-cell chronic lymphocytic leukemia, Duchenne muscular dystrophy (DMD), bladder cancer, epithelial ovarian cancer (EOC), glioblastoma multiforme (GBM), head and neck squamous cell carcinoma (HNSCC), kidney cancer, lung cancer, prostate cancer
chr11:93523741-93535138+	5	1	2	2	2	2	chr11	93523739	93535138	+	hsa_circ_1196814	circBase	NM_114268	MED17	exonic	1149
chr11:93528174-93535138+	1	1	1	1	1	3	chr11	93528173	93535138	+	hsa_circ_1196819	circBase	NM_114268	MED17	exonic	617
chr11:93579127-93612148+	2	1	1	1	1	1	chr11	93579126	93612148	+	hsa_circ_1194411	circBase	NM_125235	TNKS2	exonic	1539
chr11:93611318-93611193+	1	1	1	1	1	2	chr11	93611317	93611193	+	hsa_circ_1194412	circBase	NM_125235	TNKS2	exonic	1288
chr11:93618141-93611193+	1	1	1	1	1	2	chr11	93618139	93611193	+	hsa_circ_1118332	circBase	NM_125235	TNKS2	exonic	457
chr11:93699719-93712325+	1	1	1	6	1	1	chr11	93699718	93712325	+	hsa_circ_1119121	circBase	NM_113972	BTAF1	exonic	262
chr11:93711161-93717151+	1	1	1	1	1	1	chr11	93711159	93717151	+	hsa_circ_1115474	circBase	NM_113972	BTAF1	exonic	511
chr11:93711161-93726514+	1	1	1	3	1	1	chr11	93711159	93726514	+	hsa_circ_1194426	circBase	NM_113972	BTAF1	exonic	1251
chr11:93751876-93757518+	3	1	1	1	1	1	chr11	93751875	93757518	+	hsa_circ_1194439	circBase	NM_113972	BTAF1	exonic	816
chr11:93751876-93768132+	1	1	1	2	1	1	chr11	93751875	93768132	+	hsa_circ_1115975	circBase	NM_113972	BTAF1	exonic	959
chr11:93754292-93768132+	1	1	1	3	3	1	chr11	93754291	93768132	+	hsa_circ_1118148	circBase	NM_113972	BTAF1	exonic	614
chr11:93756126-93757518+	1	1	1	1	3	1	chr11	93756125	93757518	+	hsa_circ_1113584	circBase	NM_113972	BTAF1	exonic	351
chr11:93756126-93768132+	3	1	2	6	1	1	chr11	93756125	93768132	+	hsa_circ_1117578	circBase	NM_113972	BTAF1	exonic	514
chr11:93756126-93773786+	1	1	1	3	1	1	chr11	93756125	93773786	+	hsa_circ_1119138	circBase	NM_113972	BTAF1	exonic	1275
chr11:93841177-93851711-	1	1	1	1	1	3	chr11	93841176	93851711	-	hsa_circ_1114224	circBase	NM_114912	CPEB3	exonic	297
chr11:93912786-93914869-	1	1	1	1	2	1	chr11	93912785	93914869	-	hsa_circ_1112435	circBase	NM_111178137	CPEB3	exonic	258
chr11:93912786-93941776-	1	1	1	3	2	1	chr11	93912785	93941776	-	hsa_circ_1119146	circBase	NM_114912	CPEB3	exonic	288
chr11:93912786-93952393-	1	1	1	2	1	1	chr11	93912785	93952393	-	hsa_circ_1119147	circBase	NM_114912	CPEB3	exonic	448
chr11:94178976-94181614-	1	1	2	3	4	4	chr11	94178975	94181614	-	hsa_circ_1124137	circBase	NM_115591	MRE11A	exonic	314
chr11:94219191-94224131-	1	1	2	2	1	1	chr11	94219189	94224131	-	hsa_circ_1124143	circBase	NM_115591	MRE11A	exonic	294
chr11:94219194-94224131-	1	1	1	1	1	1	chr11	94219193	94224131	-	hsa_circ_1196816	circBase	NM_115591	MRE11A	sense overlapping	5138
chr11:94234598-94235751-	1	1	1	1	2	1	chr11	94234597	94235751	-	hsa_circ_1194461	circBase	NM_114969	IDE	exonic	232
chr11:94234598-94267962-	1	1	1	1	1	1	chr11	94234597	94267962	-	hsa_circ_1194462	circBase	NM_114969	IDE	exonic	1156
chr11:94264551-94267962-	1	1	1	1	2	1	chr11	94264551	94267962	-	hsa_circ_1194469	circBase	NM_114969	IDE	exonic	371
chr11:94269817-94297317-	1	1	1	1	1	2	chr11	94269816	94297317	-	hsa_circ_1194474	circBase	NM_114969	IDE	exonic	799
chr11:94291515-94297317-	1	1	1	3	1	1	chr11	94291514	94297317	-	hsa_circ_1111251	circBase	NM_114969	IDE	exonic	563	Alzheimer's disease, B-cell chronic lymphocytic leukemia, Duchenne muscular dystrophy (DMD), Oral Carcinoma, acute lymphoblastic leukemia (ALL), acute myeloid leukemia (AML), acute promyelocytic leukemia (APL), autism spectrum disorder (ASD), bladder cancer, breast cancer, cardiac hypertrophy, cervical cancer, chronic lymphocytic leukemia (CLL), colorectal cancer, glioblastoma, glioma, hepatocell…
chr11:9431133-9435958+	1	1	1	3	1	1	chr11	9431132	9435958	+	hsa_circ_1113817	circBase	NM_116391	IPO7	exonic	471
chr11:94396941-94415399+	2	1	2	1	1	1	chr11	94396941	94415399	+	hsa_circ_1194483	circBase	NM_114523	KIF11	exonic	672
chr11:9444553-9446819+	1	1	1	1	2	1	chr11	9444552	9446819	+	hsa_circ_1196831	circBase	NM_116391	IPO7	exonic	429
chr11:9451221-9452551+	1	1	2	1	1	1	chr11	9451221	9452551	+	hsa_circ_1115192	circBase	NM_116391	IPO7	exonic	291
chr11:9462112-9463744+	2	1	1	1	2	1	chr11	9462111	9463744	+	hsa_circ_1114117	circBase	NM_116391	IPO7	exonic	324
chr11:94653116-94654777+	1	1	1	2	1	1	chr11	94653115	94654777	+	hsa_circ_1194491	circBase	NM_119153	EXOC6	exonic	311
chr11:94653116-94659411+	1	1	1	18	11	11	chr11	94653115	94659411	+	hsa_circ_1119171	circBase	NM_119153	EXOC6	exonic	357
chr11:94653116-94669388+	2	1	1	1	4	1	chr11	94653115	94669388	+	hsa_circ_1119171	circBase	NM_119153	EXOC6	exonic	562
chr11:94669184-94669388+	1	1	3	1	1	1	chr11	94669183	94669388	+		novel	NM_119153	EXOC6	exonic	215
chr11:94693911-94711581+	1	1	2	2	1	1	chr11	94693911	94711581	+	hsa_circ_1194513	circBase	NM_119153	EXOC6	exonic	338
chr11:94718131-94733989+	1	1	3	1	1	1	chr11	94718131	94733989	+	hsa_circ_1194519	circBase	NM_119153	EXOC6	exonic	643
chr11:95141976-95148911-	1	1	1	2	1	1	chr11	95141975	95148911	-	hsa_circ_1115898	circBase	NM_113451	MYOF	exonic	421
chr11:95275162-95279564+	1	1	1	1	1	2	chr11	95275161	95279564	+		novel	NM_118131	CEP55	exonic	663
chr11:95431527-95447216-	2	1	1	1	1	1	chr11	95431526	95447216	-	hsa_circ_1194528	circBase	NM_145246	FRA11AC1	exonic	441
chr11:95512771-95521727-	1	1	1	1	2	1	chr11	95512771	95521727	-	hsa_circ_1124166	circBase	NM_144664	FAM76B	exonic	615
chr11:95546196-95552168+	1	1	1	2	1	1	chr11	95546195	95552168	+	hsa_circ_1118821	circBase	NM_114679	CEP57	exonic	497
chr11:95587249-95588341-	1	1	1	2	1	1	chr11	95587248	95588341	-		novel	ENST11111346299	MTMR2	intronic	1193
chr11:95823115-95823194-	1	1	1	1	1	1	chr11	95823114	95823194	-		novel	ENST11111524717	MAML2	intronic	191
chr11:95825156-95826681-	1	6	2	1	1	2	chr11	95825155	95826681	-	hsa_circ_1124185	circBase	NM_132427	MAML2	exonic	1626
chr11:9597435-9613225+	2	1	1	1	1	1	chr11	9597434	9613225	+		novel	NM_113391	WEE1	exonic	712
chr11:96119871-96112161-	1	1	1	2	1	1	chr11	96119869	96112161	-	hsa_circ_1119241	circBase	NM_122451	NOC3L	exonic	271
chr11:96193147-96114851-	1	1	1	1	1	3	chr11	96193146	96114851	-		novel	NM_122451	NOC3L	sense overlapping	21714
chr11:96211653-96213181+	1	1	1	3	1	1	chr11	96211652	96213181	+	hsa_circ_1194547	circBase	NM_115188	TBC1D12	sense overlapping	1528
chr11:96334311-96356868+	1	1	1	2	1	1	chr11	96334311	96356868	+		novel	NM_118163	HELLS	exonic	1717
chr11:96818192-96827448-	1	1	2	1	1	1	chr11	96818191	96827448	-		novel	NM_111771	CYP2C8	exonic	651
chr11:97156977-97158946-	1	1	1	1	2	1	chr11	97156976	97158946	-		novel	NM_116434	SORBS1	exonic	237
chr11:972162-981299+	1	1	1	3	1	1	chr11	972161	981299	+		novel	NM_112315	AP2A2	exonic	426
chr11:9735113-9746432+	1	1	2	1	1	1	chr11	9735112	9746432	+		novel	NM_115155	SWAP71	exonic	412
chr11:9735113-9751998+	1	1	1	1	1	5	chr11	9735112	9751998	+		novel	NM_115155	SWAP71	exonic	658
chr11:9735113-9761894+	1	1	2	1	1	1	chr11	9735112	9761894	+	hsa_circ_1196862	circBase	NM_115155	SWAP71	exonic	1115
chr11:9735113-9771731+	1	1	1	1	1	3	chr11	9735112	9771731	+	hsa_circ_1196863	circBase	NM_115155	SWAP71	exonic	1411
chr11:97392716-97393416-	1	1	1	3	1	1	chr11	97392715	97393416	-	hsa_circ_1194626	circBase	NM_112861	ALDH18A1	exonic	251
chr11:9746215-9754257+	1	1	1	2	1	1	chr11	9746214	9754257	+	hsa_circ_1121219	circBase	NM_115155	SWAP71	exonic	666
chr11:97681773-97687189+	1	1	1	2	1	1	chr11	97681772	97687189	+	hsa_circ_1194631	circBase	NM_111131446	C11orf131	exonic	311
chr11:97959831-97964372-	1	1	1	2	1	1	chr11	97959831	97964372	-		novel	NM_113314	BLNK	exonic	278
chr11:97987166-97987322-	3	1	1	1	1	1	chr11	97987165	97987322	-	hsa_circ_1119283	circBase	NM_113314	BLNK	exonic	157
chr11:98313833-98336586-	1	1	1	5	1	1	chr11	98313832	98336586	-	hsa_circ_1194647	circBase	NM_121123	TM9SF3	exonic	1183
chr11:98381119-98388251-	1	1	1	2	1	1	chr11	98381118	98388251	-		novel	NM_152319	PIK3AP1	exonic	566
chr11:98618149-98667514+	1	1	1	1	1	4	chr11	98618148	98667514	+	hsa_circ_1116198	circBase	NM_132441	LCOR	sense overlapping	49456
chr11:98644161-98667514+	1	1	1	2	1	1	chr11	98644159	98667514	+	hsa_circ_1194657	circBase	NM_132441	LCOR	sense overlapping	23345
chr11:98667122-98667514+	1	1	2	1	1	2	chr11	98667121	98667514	+	hsa_circ_1117717	circBase	NM_132441	LCOR	exonic	146
chr11:98667122-98711953+	2	1	1	1	1	1	chr11	98667121	98711953	+	hsa_circ_1119316	circBase	NM_132441	LCOR	exonic	661
chr11:98713871-98711953+	4	1	1	2	1	2	chr11	98713869	98711953	+	hsa_circ_1118112	circBase	NM_132441	LCOR	exonic	515
chr11:99113725-99119385-	2	1	1	1	1	2	chr11	99113724	99119385	-	hsa_circ_1194674	circBase	NM_132911	ARHGAP19	exonic	572
chr11:99116129-99123386-	2	1	1	1	1	1	chr11	99116128	99123386	-	hsa_circ_1194675	circBase	NM_132911	ARHGAP19	exonic	591
chr11:99116129-99124663-	1	1	1	1	1	3	chr11	99116128	99124663	-	hsa_circ_1119322	circBase	NM_132911	ARHGAP19	exonic	671
chr11:99116175-99124663-	1	1	2	1	1	1	chr11	99116174	99124663	-		novel	NM_132911	ARHGAP19	exonic	615
chr11:99196174-99197517-	6	1	1	4	9	5	chr11	99196173	99197517	-	hsa_circ_1115887	circBase	NM_116146	EXOSC1	sense overlapping	1334
chr11:99196174-99198461-	1	1	2	1	1	1	chr11	99196173	99198461	-	hsa_circ_1194679	circBase	NM_116146	EXOSC1	sense overlapping	2287
chr11:99196948-99197517-	4	1	2	1	1	1	chr11	99196947	99197517	-	hsa_circ_1114896	circBase	NM_116146	EXOSC1	exonic	136
chr11:99196948-99198461-	1	1	1	1	3	1	chr11	99196947	99198461	-	hsa_circ_1115197	circBase	NM_116146	EXOSC1	exonic	171
chr11:99416142-99416731+	1	1	1	1	2	1	chr11	99416141	99416731	+	hsa_circ_1115111	circBase	NM_118425	PI4K2A	exonic	286
chr12:111114743-111179565+	2	1	1	1	1	1	chr12	111114742	111179565	+		novel	uc111svl.1	ANO4	sense overlapping	74823
chr12:111158633-111162559-	1	1	1	1	1	2	chr12	111158632	111162559	-		novel	NM_112711	PPP1CC	sense overlapping	3927
chr12:111187973-111189253-	1	1	1	1	1	2	chr12	111187972	111189253	-		novel	NM_132369	HVCN1	exonic	345
chr12:11126254-11199787-	1	1	1	1	1	1	chr12	11126253	11199787	-	hsa_circ_1117481	circBase	NR_137918	PRH1-PRR4	exonic	341
chr12:111376185-111377152-	1	1	2	1	1	3	chr12	111376184	111377152	-	hsa_circ_1197219	circBase	NM_114776	GIT2	exonic	272
chr12:111426768-111429565-	1	1	1	3	1	1	chr12	111426767	111429565	-	hsa_circ_1128161	circBase	NM_114776	GIT2	exonic	353
chr12:111456151-111466447+	6	5	4	1	2	1	chr12	111456149	111466447	+	hsa_circ_1197229	circBase	NM_133121	ANKRD13A	exonic	676
chr12:111461851-111466447+	1	1	1	1	1	1	chr12	111461851	111466447	+		novel	NM_133121	ANKRD13A	exonic	342
chr12:111491143-111492319-	1	1	1	1	1	2	chr12	111491142	111492319	-	hsa_circ_1127851	circBase	NM_115154	UHRF1BP1L	exonic	331
chr12:111565165-111573242+	1	1	1	1	1	2	chr12	111565164	111573242	+	hsa_circ_1197237	circBase	NM_114155	IFT81	exonic	717
chr12:111598718-111599522+	1	1	1	1	1	2	chr12	111598717	111599522	+	hsa_circ_1127857	circBase	NM_122496	ACTR6	exonic	187
chr12:111613851-111616316+	1	1	1	1	1	1	chr12	111613851	111616316	+	hsa_circ_1196952	circBase	NM_122496	ACTR6	exonic	371
chr12:111676721-111691953+	1	1	3	1	1	3	chr12	111676721	111691953	+	hsa_circ_1116258	circBase	NM_117988	SCYL2	exonic	518
chr12:111727179-111728282+	1	1	2	1	1	1	chr12	111727178	111728282	+	hsa_circ_1197121	circBase	NM_114513	UTP21	exonic	224
chr12:111727179-111739472+	1	1	1	2	1	1	chr12	111727178	111739472	+	hsa_circ_1197122	circBase	NM_114513	UTP21	exonic	1329
chr12:111729825-111734542+	1	1	1	4	1	1	chr12	111729824	111734542	+	hsa_circ_1197268	circBase	NM_111681	ATP2A2	exonic	244
chr12:111761797-111765822+	1	1	2	2	1	1	chr12	111761796	111765822	+	hsa_circ_1197271	circBase	NM_111681	ATP2A2	exonic	632
chr12:111832916-111834257-	1	1	3	1	1	1	chr12	111832915	111834257	-	hsa_circ_1128198	circBase	NM_116238	ANAPC7	exonic	317
chr12:111855923-111856681+	1	1	1	1	1	2	chr12	111855922	111856681	+	hsa_circ_1116741	circBase	NM_115475	SH2B3	exonic	759
chr12:111893391-111893735-	1	1	1	1	1	1	chr12	111893391	111893735	-	hsa_circ_1128211	circBase	NM_116311	GPN3	exonic	213
chr12:111911883-111927976+	1	1	1	1	1	1	chr12	111911882	111927976	+		novel	NM_113311	FAM216A	sense overlapping	17194
chr12:111917912-111948386-	1	1	1	1	1	2	chr12	111917911	111948386	-	hsa_circ_1128249	circBase	NM_112973	ATXN2	exonic	1278
chr12:111922883-111925748+	1	1	1	3	1	1	chr12	111922882	111925748	+	hsa_circ_1114516	circBase	NM_113311	FAM216A	exonic	519
chr12:111943422-111952961+	1	1	1	1	3	1	chr12	111943421	111952961	+		novel	NM_152442	RAD9B	exonic	478
chr12:111947353-111948386-	1	1	3	4	2	1	chr12	111947352	111948386	-	hsa_circ_1112611	circBase	NM_112973	ATXN2	exonic	377
chr12:111947353-111951343-	1	1	1	1	1	2	chr12	111947352	111951343	-	hsa_circ_1113387	circBase	NM_112973	ATXN2	exonic	561
chr12:111972365-111117816+	1	1	1	1	3	1	chr12	111972364	111117816	+		novel	NM_174942	GAS2L3	sense overlapping	45452
chr12:111975949-111983883-	1	1	1	1	1	2	chr12	111975948	111983883	-		novel	NM_139283	PPTC7	exonic	453
chr12:111991184-111993723-	2	1	2	1	1	2	chr12	111991183	111993723	-	hsa_circ_1112457	circBase	NM_112973	ATXN2	exonic	321
chr12:111991962-111993723-	1	1	1	3	2	1	chr12	111991961	111993723	-	hsa_circ_1111439	circBase	NM_112973	ATXN2	exonic	97	B-cell chronic lymphocytic leukemia, glioblastoma, glioblastoma multiforme (GBM), prostate cancer
chr12:11199619-11273779-	2	2	1	4	5	4	chr12	11199618	11273779	-	hsa_circ_1118221	circBase	T173922	G116941	exonic	74161
chr12:112113443-112121111-	1	1	2	1	1	1	chr12	112113442	112121111	-	hsa_circ_1128278	circBase	ENST11111327551	BRAP	exonic	814
chr12:112116955-112121111-	1	1	2	3	1	2	chr12	112116954	112121111	-	hsa_circ_1116396	circBase	ENST11111327551	BRAP	exonic	551
chr12:112119441-112121111-	2	1	1	1	1	1	chr12	112119441	112121111	-	hsa_circ_1128282	circBase	ENST11111327551	BRAP	exonic	361
chr12:11212361-11284381-	1	1	1	1	1	1	chr12	11212361	11284381	-		novel	uc111qzf.2	PRB4	intronic	72121
chr12:11212367-11284387-	1	1	1	1	1	1	chr12	11212366	11284387	-		novel	uc111qzf.2	PRB4	intronic	72121
chr12:112173931-112174399-	1	1	1	1	2	1	chr12	112173929	112174399	-	hsa_circ_1197143	circBase	NM_124312	GNPTAB	exonic	211
chr12:112196541-112197149-	1	1	2	1	1	2	chr12	112196539	112197149	-	hsa_circ_1117885	circBase	ENST11111327551	BRAP	exonic	249
chr12:112291641-112295211+	1	1	3	1	1	2	chr12	112291641	112295211	+	hsa_circ_1114459	circBase	NM_118371	DRAM1	exonic	211
chr12:112311964-112313979+	4	1	1	1	1	1	chr12	112311963	112313979	+		novel	NM_118371	DRAM1	exonic	331
chr12:112311964-112318111+	2	1	1	4	2	6	chr12	112311963	112318111	+	hsa_circ_1111431	circBase	NM_118371	DRAM1	exonic	237
chr12:112315376-112318984+	1	1	1	1	3	1	chr12	112315375	112318984	+	hsa_circ_1115985	circBase	NM_113668	MAPKAPK5	exonic	393
chr12:112326292-112331389+	1	1	1	2	1	1	chr12	112326291	112331389	+		novel	NM_113668	MAPKAPK5	sense overlapping	5198
chr12:112371391-112381173-	1	1	1	4	1	1	chr12	112371389	112381173	-	hsa_circ_1128319	circBase	NM_138341	TMEM116	exonic	597
chr12:112371691-112381173-	1	1	1	2	1	2	chr12	112371689	112381173	-	hsa_circ_1114216	circBase	NM_138341	TMEM116	exonic	523
chr12:112419752-112439897-	1	1	1	1	3	1	chr12	112419751	112439897	-	hsa_circ_1118151	circBase	NM_116153	CCDC53	exonic	351
chr12:112461419-112461584+	1	1	1	1	2	1	chr12	112461418	112461584	+		novel	NM_116817	ERP29	sense overlapping	176
chr12:112471137-112486247-	1	1	1	1	2	1	chr12	112471136	112486247	-	hsa_circ_1197365	circBase	NM_124953	NAA25	exonic	1168
chr12:112513482-112516545-	1	1	1	4	1	1	chr12	112513481	112516545	-	hsa_circ_1197378	circBase	NM_124953	NAA25	exonic	299
chr12:112513482-112531941-	1	1	1	1	1	2	chr12	112513481	112531941	-	hsa_circ_1197379	circBase	NM_124953	NAA25	exonic	718
chr12:112516684-112518938-	1	1	1	1	1	1	chr12	112516683	112518938	-	hsa_circ_1197376	circBase	NM_124953	NAA25	exonic	747
chr12:112667512-112669519-	1	1	1	1	1	1	chr12	112667511	112669519	-	hsa_circ_1197411	circBase	NM_111119662	HECTD4	exonic	522
chr12:11273619-11276922-	2	1	3	1	3	2	chr12	11273618	11276922	-	hsa_circ_1197431	circBase	uc111qzf.2	PRB4	intronic	3314
chr12:11273619-11281962-	1	1	1	1	5	1	chr12	11273618	11281962	-	hsa_circ_1197432	circBase	uc111qzf.2	PRB4	intronic	8354
chr12:11273619-11294754-	1	1	1	1	2	1	chr12	11273618	11294754	-		novel	uc111qzf.2	PRB4	intronic	21146
chr12:112757129-112757546-	1	1	1	1	1	2	chr12	112757128	112757546	-	hsa_circ_1112584	circBase	NM_111119662	HECTD4	exonic	518
chr12:112884181-112915819+	1	1	1	3	1	1	chr12	112884179	112915819	+	hsa_circ_1128419	circBase	NM_112834	PTPN11	exonic	1178
chr12:112888122-112893867+	1	1	1	1	1	2	chr12	112888121	112893867	+	hsa_circ_1113425	circBase	NM_112834	PTPN11	exonic	619
chr12:112939948-112944226+	1	1	3	1	1	1	chr12	112939947	112944226	+	hsa_circ_1197441	circBase	NM_112834	PTPN11	sense overlapping	4279
chr12:113541751-113542113-	1	1	1	2	1	1	chr12	113541751	113542113	-	hsa_circ_1197448	circBase	NM_114658	RASAL1	exonic	274
chr12:113657114-113664186-	2	1	6	1	7	1	chr12	113657113	113664186	-		novel	NR_113526	C12orf42	sense overlapping	6983
chr12:113657114-113671988-	1	1	1	1	1	1	chr12	113657113	113671988	-		novel	NR_113526	C12orf42	exonic	1431
chr12:1136914-1137738+	1	1	2	16	20	16	chr12	1136913	1137738	+	hsa_circ_1111373	circBase	NM_178139	ERC1	exonic	825	Cerebellar neurodegeneration, acute myeloid leukemia (AML), cardiac hypertrophy, epithelial ovarian cancer (EOC), esophageal cancer, non-alcoholic fatty liver disease (NAFLD), pancreatic cancer, pituitary adenoma, prostate cancer
chr12:11369988-11371741+	1	1	1	1	5	1	chr12	11369987	11371741	+		novel	ENST11111541453	GABARAPL1	intronic	753
chr12:113715648-113717651+	1	1	1	1	4	1	chr12	113715647	113717651	+	hsa_circ_1112857	circBase	NM_117911	TPCN1	exonic	334
chr12:113728111-113728813+	2	1	1	1	1	1	chr12	113727999	113728813	+		novel	NM_117911	TPCN1	sense overlapping	814
chr12:113758136-113759153-	1	1	1	1	2	1	chr12	113758135	113759153	-	hsa_circ_1197455	circBase	NM_124959	SLC8B1	exonic	538
chr12:11396689-11412563+	1	1	1	1	1	1	chr12	11396688	11412563	+		novel	ENST11111539328	RP11-711K1.8	intronic	5875
chr12:114299916-114319861-	1	1	1	1	1	5	chr12	114299915	114319861	-		novel	NR_127249	GNN	sense overlapping	9946
chr12:114327958-114341617+	1	1	1	2	1	1	chr12	114327957	114341617	+		novel	NM_113299	HSP91B1	sense overlapping	13661
chr12:114371696-114374741+	1	1	2	1	1	2	chr12	114371695	114374741	+	hsa_circ_1127944	circBase	NM_113211	TDG	exonic	455
chr12:114514178-114517211-	4	1	4	2	2	1	chr12	114514177	114517211	-	hsa_circ_1197178	circBase	NM_116166	NFYB	exonic	361
chr12:114712691-114721449+	1	1	1	4	1	1	chr12	114712691	114721449	+	hsa_circ_1117674	circBase	NM_113331	TXNRD1	exonic	812
chr12:114963666-114995769+	1	1	1	1	2	1	chr12	114963665	114995769	+		novel	NM_118413	CHST11	sense overlapping	32114
chr12:115146955-115147156+	1	1	2	1	1	1	chr12	115146954	115147156	+		novel	ENST11111313694	CHST11	intronic	212
chr12:115149832-115151117+	1	1	1	1	1	1	chr12	115149831	115151117	+		novel	ENST11111313694	CHST11	intronic	176
chr12:115255169-115289123-	1	1	1	2	1	1	chr12	115255168	115289123	-	hsa_circ_1197111	circBase	NM_132148	SLC41A2	exonic	592
chr12:115255169-115322472-	1	1	1	1	1	1	chr12	115255168	115322472	-	hsa_circ_1127969	circBase	NM_132148	SLC41A2	exonic	1422
chr12:115281171-115322472-	2	1	1	1	1	1	chr12	115281171	115322472	-	hsa_circ_1127971	circBase	NM_132148	SLC41A2	exonic	1194
chr12:11531731-11531314-	1	1	1	1	4	1	chr12	11531731	11531314	-		novel	NM_117361	KLRK1	exonic	256
chr12:115321751-115322472-	2	1	1	3	2	3	chr12	115321751	115322472	-	hsa_circ_1116261	circBase	NM_132148	SLC41A2	exonic	722
chr12:115321751-115325569-	2	1	1	2	1	1	chr12	115321751	115325569	-	hsa_circ_1197118	circBase	NM_132148	SLC41A2	sense overlapping	3819
chr12:115514376-115514866+	1	1	1	1	2	1	chr12	115514375	115514866	+	hsa_circ_1197119	circBase	ENST11111311317	KIAA1133	intronic	491
chr12:115514913-115521167+	1	1	1	1	3	1	chr12	115514912	115521167	+	hsa_circ_1197113	circBase	NM_115275	KIAA1133	exonic	1138
chr12:115591119-115594563+	1	1	1	2	1	1	chr12	115591118	115594563	+		novel	NM_118171	APPL2	antisense	4555
chr12:11572963-11588119-	2	1	1	1	1	1	chr12	11572962	11588119	-		novel	NM_112261	KLRC2	sense overlapping	15147
chr12:115781886-115841742+	1	1	1	1	1	1	chr12	115781885	115841742	+		novel	ENST11111549893	C12orf75	sense overlapping	59857
chr12:116444368-116444813-	1	1	1	1	3	1	chr12	116444367	116444813	-		novel	ENST11111281928	MED13L	intronic	436
chr12:116534474-116549317-	1	1	1	3	1	5	chr12	116534473	116549317	-	hsa_circ_1111441	circBase	NM_115335	MED13L	exonic	169	Alzheimer's disease, B-cell chronic lymphocytic leukemia, Duchenne muscular dystrophy (DMD), Oral Carcinoma, acute myeloid leukemia (AML), acute promyelocytic leukemia (APL), autism spectrum disorder (ASD), breast cancer, chronic lymphocytic leukemia (CLL), colorectal cancer, glioblastoma, glioma, hepatocellular carcinoma (HCC), lung cancer, multiple myeloma (MM), nemaline myopathy (NM), pancreat…
chr12:116638799-116662319-	1	1	1	1	1	2	chr12	116638798	116662319	-		novel	ENST11111281928	MED13L	intronic	23521
chr12:116668238-116675511-	1	1	1	4	1	4	chr12	116668237	116675511	-	hsa_circ_1111442	circBase	NM_115335	MED13L	sense overlapping	7273	bladder cancer, cardiac hypertrophy, chronic myeloid leukemia (CML), colorectal cancer, diffuse large B-cell lymphoma (DLBCL), pancreatic cancer, prostate cancer, psoriasis, uterine leiomyoma (ULM)
chr12:116668338-116675511-	6	1	8	6	18	12	chr12	116668337	116675511	-	hsa_circ_1111443	circBase	NM_115335	MED13L	sense overlapping	7173	bladder cancer, cardiac hypertrophy, chronic myeloid leukemia (CML), colorectal cancer, diffuse large B-cell lymphoma (DLBCL), pancreatic cancer, prostate cancer, psoriasis, uterine leiomyoma (ULM)
chr12:116669864-116675511-	6	6	4	3	2	1	chr12	116669863	116675511	-		novel	NM_115335	MED13L	sense overlapping	5647
chr12:116674626-116675511-	1	1	1	2	1	5	chr12	116674625	116675511	-	hsa_circ_1118151	circBase	NM_115335	MED13L	sense overlapping	885
chr12:116675273-116675511-	2	1	1	1	1	4	chr12	116675272	116675511	-	hsa_circ_1128587	circBase	NM_115335	MED13L	exonic	238
chr12:117153954-117154771-	1	1	1	2	1	1	chr12	117153953	117154771	-		novel	NM_124738	C12orf49	sense overlapping	818
chr12:117218474-117219598+	1	1	1	2	1	1	chr12	117218473	117219598	+	hsa_circ_1116542	circBase	NM_118157	RIC8B	exonic	714
chr12:117236367-117254191+	1	1	1	1	1	2	chr12	117236366	117254191	+	hsa_circ_1128121	circBase	NM_118157	RIC8B	exonic	615
chr12:117365828-117412659+	1	1	2	1	1	1	chr12	117365827	117412659	+	hsa_circ_1113677	circBase	NM_112174	FBXW8	exonic	517
chr12:117393329-117393861-	3	1	1	1	1	1	chr12	117393328	117393861	-	hsa_circ_1197165	circBase	NM_114175	CRY1	exonic	453
chr12:117423111-117426674+	1	1	1	2	1	1	chr12	117423111	117426674	+	hsa_circ_1116151	circBase	NM_112174	FBXW8	exonic	414
chr12:117593596-117615446-	1	1	1	2	1	1	chr12	117593595	117615446	-		novel	NM_115112	FBXO21	exonic	1215
chr12:118133161-118141211-	1	1	1	1	3	1	chr12	118133159	118141211	-	hsa_circ_1128145	circBase	NM_112416	PRDM4	exonic	967
chr12:118134188-118135948+	2	1	1	1	1	1	chr12	118134187	118135948	+		novel	NM_111117523	BTBD11	exonic	185
chr12:118456877-118465835+	4	1	1	1	1	1	chr12	118456876	118465835	+	hsa_circ_1128631	circBase	NM_117371	RFC5	exonic	816
chr12:118855192-118855455+	1	1	1	1	1	1	chr12	118855191	118855455	+		novel	NM_122491	SUDS3	sense overlapping	264
chr12:119146148-119148186-	4	1	1	5	3	15	chr12	119146147	119148186	-	hsa_circ_1111437	circBase	NM_114325	CORO1C	exonic	251	Alzheimer's disease, Burkitt lymphoma, Down syndrome (DS), Hodgkin's lymphoma, acute lymphoblastic leukemia (ALL), acute myeloid leukemia (AML), acute promyelocytic leukemia (APL), adenoma, breast cancer, cardiac hypertrophy, cervical cancer, cholangiocarcinoma, chronic lymphocytic leukemia (CLL), colorectal cancer, diffuse large B-cell lymphoma (DLBCL), epithelial ovarian cancer (EOC), facioscap…
chr12:119212125-119212334-	1	1	1	1	1	2	chr12	119212124	119212334	-	hsa_circ_1118626	circBase	ENST11111546812	SSH1	intronic	311
chr12:11933721-11933917+	1	1	2	1	1	1	chr12	11933719	11933917	+		novel	ENST11111396373	ETV6	intronic	188
chr12:119519417-119511337+	1	1	1	1	2	1	chr12	119519416	119511337	+	hsa_circ_1128194	circBase	NM_132663	USP31	exonic	241
chr12:119687789-119696913+	1	1	1	1	3	1	chr12	119687788	119696913	+	hsa_circ_1128129	circBase	NM_111193	ACACB	exonic	827
chr12:11992174-11992238+	1	1	1	1	3	1	chr12	11992173	11992238	+	hsa_circ_1125465	circBase	NM_111987	ETV6	exonic	165
chr12:121111769-121114475+	1	1	1	1	2	1	chr12	121111768	121114475	+	hsa_circ_1128673	circBase	NM_116253	PRKAB1	exonic	343
chr12:121138551-121142261-	1	1	1	1	2	1	chr12	121138549	121142261	-	hsa_circ_1128679	circBase	NM_117174	CIT	exonic	412
chr12:121189855-121214986-	1	1	1	1	1	1	chr12	121189854	121214986	-		novel	NM_117174	CIT	exonic	696
chr12:121213591-121214646-	1	1	2	1	1	1	chr12	121213589	121214646	-	hsa_circ_1113912	circBase	NM_117174	CIT	exonic	276
chr12:121221458-121222396-	7	1	6	3	11	6	chr12	121221457	121222396	-	hsa_circ_1113472	circBase	NM_139115	SPPL3	exonic	312
chr12:121221458-121229361-	1	1	1	1	6	1	chr12	121221457	121229361	-	hsa_circ_1114479	circBase	NM_139115	SPPL3	exonic	411
chr12:121461793-121465621-	1	1	1	1	1	3	chr12	121461792	121465621	-		novel	NM_113733	OASL	exonic	391
chr12:121511132-121511357+	1	1	2	1	1	1	chr12	121511131	121511357	+		novel	ENST11111397558	CCDC64	intronic	226
chr12:121519426-121518821+	1	1	2	1	1	1	chr12	121519425	121518821	+	hsa_circ_1197521	circBase	NM_217311	CCDC64	exonic	531
chr12:121581311-121612525-	1	1	1	2	1	1	chr12	121581311	121612525	-		novel	NM_116836	GCN1L1	exonic	4217
chr12:121592774-121593523-	1	1	3	6	4	7	chr12	121592773	121593523	-	hsa_circ_1111448	circBase	NM_116836	GCN1	exonic	389
chr12:121612965-121614121-	1	1	1	1	1	4	chr12	121612964	121614121	-	hsa_circ_1117129	circBase	NM_116836	GCN1	exonic	255
chr12:121614951-121615249+	1	1	1	1	3	1	chr12	121614949	121615249	+		novel	NM_112562	P2RX7	exonic	216
chr12:121716441-121718748-	1	1	1	2	4	1	chr12	121716441	121718748	-	hsa_circ_1114756	circBase	NM_116549	CAMKK2	exonic	154
chr12:121749811-121755846-	1	1	1	1	1	2	chr12	121749811	121755846	-		novel	ENST11111261819	ANAPC5	intronic	6146
chr12:121853962-121855714+	1	1	2	1	1	5	chr12	121853961	121855714	+	hsa_circ_1114513	circBase	NM_125126	RNF34	exonic	627
chr12:1219358-1225199+	1	1	1	1	1	2	chr12	1219357	1225199	+	hsa_circ_1197561	circBase	NM_178139	ERC1	exonic	324
chr12:121995185-121995485+	9	1	11	5	11	4	chr12	121995184	121995485	+	hsa_circ_1128899	circBase	NM_114868	RNF11	exonic	322
chr12:121995483-121995633+	1	1	1	1	1	1	chr12	121995482	121995633	+		novel	ENST11111542438	RNF11	intronic	151
chr12:122218778-122219198-	1	1	1	1	1	4	chr12	122218777	122219198	-	hsa_circ_1111451	circBase	NM_119134	RHOF	exonic	245	Duchenne muscular dystrophy (DMD), acute myeloid leukemia (AML), breast cancer, cardiac hypertrophy, cholangiocarcinoma, chronic lymphocytic leukemia (CLL), colorectal cancer, facioscapulohumeral muscular dystrophy (FSHD), glioblastoma multiforme (GBM), head and neck squamous cell carcinoma (HNSCC), kidney cancer, limb-girdle muscular dystrophies types 2A (LGMD2A), lung cancer, malignant melanoma…
chr12:122381441-122386967+	1	1	1	1	1	2	chr12	122381439	122386967	+	hsa_circ_1113414	circBase	NM_144668	WDR66	exonic	271
chr12:122468616-122481959+	1	1	1	1	1	1	chr12	122468615	122481959	+	hsa_circ_1111452	circBase	NM_121993	BCL7A	exonic	347
chr12:1225132-1292587+	1	1	1	1	1	1	chr12	1225131	1292587	+		novel	NM_178139	ERC1	exonic	756
chr12:122812494-122812973-	1	1	1	1	1	1	chr12	122812493	122812973	-	hsa_circ_1197617	circBase	NM_112956	CLIP1	exonic	382
chr12:122825311-122826244-	1	1	1	1	1	6	chr12	122825299	122826244	-	hsa_circ_1129169	circBase	NM_112956	CLIP1	exonic	945
chr12:122861936-122865115-	1	1	1	2	1	2	chr12	122861935	122865115	-	hsa_circ_1115465	circBase	NM_112956	CLIP1	exonic	763
chr12:122968117-122983411-	1	1	1	1	1	2	chr12	122968116	122983411	-	hsa_circ_1197626	circBase	NM_117612	ZCCHC8	sense overlapping	15414
chr12:122973933-122977336-	1	1	1	1	1	1	chr12	122973932	122977336	-	hsa_circ_1197628	circBase	NM_117612	ZCCHC8	exonic	259
chr12:122989886-122991133-	1	1	1	1	1	3	chr12	122989885	122991133	-		novel	NM_123112	RSRC2	sense overlapping	248
chr12:123114569-123124311+	1	1	1	2	1	1	chr12	123114568	123124311	+		novel	uc111taf.2	KNTC1	exonic	487
chr12:123131723-123132516+	1	1	1	1	4	1	chr12	123131722	123132516	+	hsa_circ_1129198	circBase	NM_114718	KNTC1	exonic	318
chr12:123141931-123142236+	4	2	10	4	2	1	chr12	123141931	123142236	+	hsa_circ_1112662	circBase	NM_114718	KNTC1	exonic	216
chr12:123141931-123147246+	1	1	1	1	1	2	chr12	123141931	123147246	+		novel	NM_114718	KNTC1	exonic	332
chr12:123152818-123161576+	1	1	3	2	1	1	chr12	123152817	123161576	+	hsa_circ_1197641	circBase	NM_114718	KNTC1	exonic	1117
chr12:123162219-123165217+	1	1	1	4	1	1	chr12	123162218	123165217	+	hsa_circ_1114265	circBase	NM_114718	KNTC1	exonic	261
chr12:123164452-123165217+	1	1	1	2	1	1	chr12	123164451	123165217	+	hsa_circ_1197644	circBase	NM_114718	KNTC1	exonic	141
chr12:123168825-123111173+	1	1	1	1	1	2	chr12	123168824	123111173	+		novel	NM_114718	KNTC1	exonic	2767
chr12:123168825-123169537+	1	1	1	2	1	1	chr12	123168824	123169537	+	hsa_circ_1197646	circBase	NM_114718	KNTC1	exonic	271
chr12:123168825-123173363+	1	1	1	3	1	1	chr12	123168824	123173363	+	hsa_circ_1197647	circBase	NM_114718	KNTC1	exonic	736
chr12:12332744-12341153-	1	1	1	2	1	1	chr12	12332743	12341153	-	hsa_circ_1118932	circBase	NM_112336	LRP6	exonic	898
chr12:12332744-12356334-	1	1	1	1	1	2	chr12	12332743	12356334	-	hsa_circ_1125489	circBase	NM_112336	LRP6	exonic	1196
chr12:123661235-123679148-	1	1	1	1	4	1	chr12	123661234	123679148	-		novel	NM_122782	MPHOSPH9	exonic	431
chr12:123694613-123717674-	1	1	2	2	1	1	chr12	123694612	123717674	-	hsa_circ_1129197	circBase	NM_122782	MPHOSPH9	exonic	936
chr12:123712923-123717674-	1	1	2	1	1	1	chr12	123712922	123717674	-	hsa_circ_1129211	circBase	NM_122782	MPHOSPH9	exonic	738
chr12:123798167-123818378-	1	1	1	1	4	1	chr12	123798166	123818378	-	hsa_circ_1197727	circBase	NM_118183	SBNO1	exonic	1247
chr12:123814447-123815413-	1	1	1	1	6	1	chr12	123814446	123815413	-		novel	NM_118183	SBNO1	exonic	476
chr12:123814447-123816279-	1	1	1	2	1	1	chr12	123814446	123816279	-	hsa_circ_1129214	circBase	NM_118183	SBNO1	exonic	674
chr12:123814447-123818378-	1	1	1	1	1	1	chr12	123814446	123818378	-	hsa_circ_1197729	circBase	NM_118183	SBNO1	exonic	826
chr12:123829815-123832681-	1	1	1	1	3	1	chr12	123829814	123832681	-		novel	NM_118183	SBNO1	exonic	415
chr12:123829815-123834988-	1	1	1	2	1	1	chr12	123829814	123834988	-	hsa_circ_1112511	circBase	NM_118183	SBNO1	exonic	547
chr12:12397196-12397589-	4	1	1	2	1	1	chr12	12397195	12397589	-	hsa_circ_1111378	circBase	NM_112336	LRP6	exonic	394	Alzheimer's disease, B-cell chronic lymphocytic leukemia, Duchenne muscular dystrophy (DMD), Oral Carcinoma, acute lymphoblastic leukemia (ALL), acute myeloid leukemia (AML), acute promyelocytic leukemia (APL), autism spectrum disorder (ASD), bladder cancer, breast cancer, cardiac hypertrophy, cervical cancer, chronic lymphocytic leukemia (CLL), colorectal cancer, glioblastoma, glioma, hepatocell…
chr12:124171294-124174996+	2	1	1	1	1	3	chr12	124171293	124174996	+	hsa_circ_1111458	circBase	NM_116815	TMED2	exonic	311
chr12:124191478-124191716+	1	1	1	1	1	2	chr12	124191477	124191716	+	hsa_circ_1129235	circBase	NM_121936	DDX55	exonic	138
chr12:124219211-124236949+	1	1	1	2	1	1	chr12	124219211	124236949	+		novel	NM_112463	ATP6V1A2	exonic	1881
chr12:124221616-124233332+	1	1	2	1	1	1	chr12	124221615	124233332	+	hsa_circ_1197772	circBase	NM_112463	ATP6V1A2	exonic	1111
chr12:124496145-124496636+	1	1	1	2	1	1	chr12	124496144	124496636	+		novel	ENST11111541762	FAM111A	intronic	492
chr12:124914513-124915333-	2	1	1	1	7	1	chr12	124914512	124915333	-	hsa_circ_1129318	circBase	NM_116312	NCOR2	exonic	611
chr12:124951719-124979914-	1	1	1	1	1	1	chr12	124951718	124979914	-	hsa_circ_1129318	circBase	NM_116312	NCOR2	exonic	822
chr12:125296416-125312253-	1	1	1	1	1	1	chr12	125296415	125312253	-	hsa_circ_1129346	circBase	NM_115515	SCARB1	exonic	611
chr12:125396369-125397736-	1	1	1	6	2	7	chr12	125396368	125397736	-		novel	NM_121119	UBC	sense overlapping	1368
chr12:125396369-125398192-	1	1	1	1	1	5	chr12	125396368	125398192	-		novel	NM_121119	UBC	sense overlapping	1824
chr12:125396825-125397736-	1	1	1	2	1	1	chr12	125396824	125397736	-		novel	uc111ugv.3	UBC	intronic	912
chr12:125397965-125398192-	1	1	1	1	4	1	chr12	125397964	125398192	-		novel	NM_121119	UBC	sense overlapping	228
chr12:125497181-125519978+	1	1	1	3	1	1	chr12	125497179	125519978	+		novel	NM_181626	BRI3BP	sense overlapping	12899
chr12:125599123-125613311+	1	1	1	1	2	1	chr12	125599122	125613311	+	hsa_circ_1129377	circBase	NM_123928	AACS	exonic	216
chr12:12623633-12624748+	2	1	1	1	1	1	chr12	12623632	12624748	+		novel			intergenic	1116
chr12:12788711-12788918+	1	1	3	1	1	1	chr12	12788711	12788918	+	hsa_circ_1112873	circBase	NM_111311	CREBL2	exonic	198
chr12:12788711-12791648+	2	1	1	1	1	1	chr12	12788711	12791648	+	hsa_circ_1197859	circBase	NM_111311	CREBL2	exonic	343
chr12:129293333-129299615-	1	1	4	3	3	1	chr12	129293332	129299615	-	hsa_circ_1116689	circBase	NM_145648	SLC15A4	exonic	712
chr12:129299321-129299615-	1	1	4	1	4	4	chr12	129299319	129299615	-	hsa_circ_1111462	circBase	NM_145648	SLC15A4	exonic	296	hepatocellular carcinoma (HCC)
chr12:132237668-132251853+	2	1	1	2	1	1	chr12	132237667	132251853	+	hsa_circ_1197915	circBase	NM_114592	SFSWAP	exonic	1161
chr12:132329663-132329994+	1	1	2	1	1	1	chr12	132329662	132329994	+	hsa_circ_1129447	circBase	NM_116155	MMP17	exonic	236
chr12:133184739-133114574+	1	1	1	1	1	2	chr12	133184738	133114574	+		novel	NM_111142641	FBRSL1	exonic	324
chr12:133311971-133331719-	1	1	2	1	1	1	chr12	133311971	133331719	-		novel	NM_115114	ANKLE2	exonic	1711
chr12:133324418-133324917-	1	1	1	1	1	4	chr12	133324417	133324917	-	hsa_circ_1116177	circBase	NM_115114	ANKLE2	exonic	383
chr12:133324418-133331719-	1	1	1	1	1	2	chr12	133324417	133331719	-	hsa_circ_1118567	circBase	NM_115114	ANKLE2	exonic	1149
chr12:133331261-133331719-	1	1	1	1	2	1	chr12	133331261	133331719	-	hsa_circ_1129554	circBase	NM_115114	ANKLE2	exonic	459
chr12:133433154-133438221-	1	1	1	2	1	1	chr12	133433153	133438221	-	hsa_circ_1197935	circBase	NM_118223	CHFR	exonic	646
chr12:133433173-133438221-	1	1	1	1	1	2	chr12	133433172	133438221	-		novel	NM_118223	CHFR	sense overlapping	5148
chr12:133615461-133625434+	1	1	1	1	1	1	chr12	133615461	133625434	+		novel	NM_113428	ZNF84	sense overlapping	9974
chr12:133617864-133625434+	2	1	1	1	1	1	chr12	133617863	133625434	+		novel	NM_111127372	ZNF84	exonic	428
chr12:133727614-133728491+	1	1	1	1	2	1	chr12	133727613	133728491	+		novel	NM_115394	ZNF11	exonic	223
chr12:133768175-133768589+	2	1	1	1	2	1	chr12	133768174	133768589	+	hsa_circ_1129596	circBase	NM_113415	ZNF268	exonic	223
chr12:1399118-1481143+	1	1	1	3	1	1	chr12	1399117	1481143	+	hsa_circ_1124997	circBase	NM_178139	ERC1	exonic	316
chr12:14576843-14578417+	4	1	3	4	3	8	chr12	14576842	14578417	+	hsa_circ_1197977	circBase	NM_118179	ATF7IP	exonic	1565
chr12:14576843-14589185+	1	1	1	1	1	2	chr12	14576842	14589185	+		novel	NM_118179	ATF7IP	exonic	1798
chr12:14576843-14619524+	1	1	3	1	1	1	chr12	14576842	14619524	+	hsa_circ_1197981	circBase	NM_118179	ATF7IP	exonic	2869
chr12:14577253-14577497+	1	1	2	1	1	1	chr12	14577252	14577497	+		novel	ENST11111538511	ATF7IP	intronic	245
chr12:1481999-1517413+	1	1	1	1	3	1	chr12	1481998	1517413	+	hsa_circ_1125111	circBase	NM_178139	ERC1	exonic	244
chr12:16135242-16185588+	1	1	1	1	1	3	chr12	16135241	16185588	+		novel	NM_115954	DERA	exonic	242
chr12:1863424-1882127+	1	1	1	1	2	1	chr12	1863423	1882127	+	hsa_circ_1198163	circBase	NM_124551	ADIPOR2	exonic	377
chr12:19615444-19626289+	3	1	5	4	11	3	chr12	19615443	19626289	+	hsa_circ_1116421	circBase	NM_153217	AEBP2	exonic	316
chr12:19615444-19646921+	1	1	1	1	1	1	chr12	19615443	19646921	+	hsa_circ_1198112	circBase	NM_153217	AEBP2	exonic	513
chr12:19615444-19671147+	1	1	1	2	1	1	chr12	19615443	19671147	+		novel	NM_111114176	AEBP2	exonic	837
chr12:22517113-22517717-	4	1	1	1	1	1	chr12	22517112	22517717	-		novel	ENST11111536558	ST8SIA1	exonic	234
chr12:22517113-22545331-	1	1	1	1	2	1	chr12	22517112	22545331	-		novel	ENST11111536558	ST8SIA1	sense overlapping	38218
chr12:22622643-22671171-	1	1	2	1	1	1	chr12	22622642	22671171	-		novel	NM_114812	C2CD5	exonic	1733
chr12:22631247-22637822-	1	1	2	1	1	1	chr12	22631246	22637822	-	hsa_circ_1198152	circBase	NM_114812	C2CD5	exonic	544
chr12:22635491-22637822-	1	1	1	1	3	1	chr12	22635491	22637822	-	hsa_circ_1198153	circBase	NM_114812	C2CD5	exonic	379
chr12:22644132-22644487-	3	1	1	1	1	1	chr12	22644131	22644487	-		novel	ENST11111333957	C2CD5	intronic	356
chr12:22646157-22659753-	1	1	1	1	1	2	chr12	22646156	22659753	-	hsa_circ_1125614	circBase	NM_114812	C2CD5	exonic	224
chr12:22796697-22826594+	2	1	1	3	1	1	chr12	22796696	22826594	+	hsa_circ_1118664	circBase	NM_118638	ETNK1	exonic	789
chr12:22811948-22824289+	1	1	1	1	3	1	chr12	22811947	22824289	+	hsa_circ_1125618	circBase	NM_118638	ETNK1	exonic	368
chr12:23887618-23918658-	1	1	1	1	1	1	chr12	23887617	23918658	-	hsa_circ_1198178	circBase	NM_116941	SOX5	exonic	329
chr12:23998917-24148958-	1	1	1	1	2	1	chr12	23998916	24148958	-	hsa_circ_1198181	circBase	NM_116941	SOX5	exonic	443
chr12:25171168-25179811+	1	1	2	2	2	10	chr12	25171167	25179811	+		novel	ENST11111556161	RP11-713N11.5	sense overlapping	9733
chr12:25171168-25179821+	1	1	1	1	1	2	chr12	25171167	25179821	+		novel	ENST11111556161	RP11-713N11.5	sense overlapping	9754
chr12:25214526-25222365+	1	1	3	2	1	6	chr12	25214525	25222365	+	hsa_circ_1111381	circBase	ENST11111549437	LRMP	exonic	471
chr12:25214526-25236427+	1	1	1	1	1	2	chr12	25214525	25236427	+		novel	uc111rgg.2	LRMP	exonic	761
chr12:25216654-25222365+	1	1	4	9	1	7	chr12	25216653	25222365	+	hsa_circ_1125631	circBase	NM_116152	LRMP	exonic	327
chr12:25232178-25236427+	1	1	3	1	2	8	chr12	25232177	25236427	+	hsa_circ_1125633	circBase	NM_116152	LRMP	exonic	291
chr12:25671729-25673119-	2	1	1	1	1	1	chr12	25671728	25673119	-		novel	NM_152591	LMNTD1	exonic	391
chr12:26218169-26221646+	1	1	1	1	1	2	chr12	26218168	26221646	+	hsa_circ_1125638	circBase	NM_117211	RASSF8	exonic	1246
chr12:26568236-26596583-	1	1	1	3	1	1	chr12	26568235	26596583	-	hsa_circ_1125648	circBase	NM_112223	ITPR2	exonic	964
chr12:26713181-26755639-	3	1	1	2	2	5	chr12	26713179	26755639	-	hsa_circ_1198219	circBase	NM_112223	ITPR2	exonic	1611
chr12:26748398-26755639-	2	1	1	1	1	5	chr12	26748397	26755639	-	hsa_circ_1198222	circBase	NM_112223	ITPR2	exonic	918
chr12:26748398-26818785-	3	1	1	1	1	1	chr12	26748397	26818785	-		novel	NM_112223	ITPR2	exonic	1936
chr12:26834817-26839565-	1	1	1	2	1	1	chr12	26834816	26839565	-		novel	NM_112223	ITPR2	exonic	413
chr12:26834817-26869175-	1	1	1	1	1	2	chr12	26834816	26869175	-	hsa_circ_1198232	circBase	NM_112223	ITPR2	exonic	884
chr12:26848539-26869175-	1	1	1	2	1	1	chr12	26848538	26869175	-	hsa_circ_1198233	circBase	NM_112223	ITPR2	exonic	471
chr12:26864116-26869175-	1	1	1	2	1	1	chr12	26864115	26869175	-	hsa_circ_1198234	circBase	NM_112223	ITPR2	exonic	426
chr12:26864116-26943161-	1	1	1	2	1	1	chr12	26864115	26943161	-		novel	NM_112223	ITPR2	exonic	859
chr12:26922282-26943161-	1	1	1	2	1	1	chr12	26922281	26943161	-	hsa_circ_1198238	circBase	ENST11111545235	ITPR2	intronic	21879
chr12:27117814-27118127+	1	1	1	1	1	2	chr12	27117813	27118127	+		novel	NM_115633	FGFR1OP2	sense overlapping	314
chr12:27132717-27143561-	1	1	2	1	1	1	chr12	27132716	27143561	-	hsa_circ_1125715	circBase	NM_116551	TM7SF3	exonic	499
chr12:27143383-27156323-	1	1	1	1	2	1	chr12	27143382	27156323	-	hsa_circ_1115824	circBase	NM_116551	TM7SF3	exonic	777
chr12:27149675-27152619-	1	1	1	1	1	3	chr12	27149674	27152619	-	hsa_circ_1117683	circBase	NM_116551	TM7SF3	exonic	272
chr12:27149675-27156323-	1	1	2	1	1	1	chr12	27149674	27156323	-	hsa_circ_1125714	circBase	NM_116551	TM7SF3	exonic	427
chr12:27164111-27171666-	1	1	2	1	1	1	chr12	27164111	27171666	-		novel	NM_118164	ASUN	exonic	1156
chr12:27199191-27219159+	1	1	4	1	1	1	chr12	27199191	27219159	+	hsa_circ_1198253	circBase	ENST11111538186	MED21	sense overlapping	21169
chr12:27521195-27524381+	1	1	1	2	1	1	chr12	27521194	27524381	+	hsa_circ_1198256	circBase	NM_121183	ARNTL2	sense overlapping	3186
chr12:27521195-27529349+	1	1	1	2	1	1	chr12	27521194	27529349	+	hsa_circ_1115712	circBase	NM_121183	ARNTL2	sense overlapping	8155
chr12:27521195-27533337+	1	1	1	3	1	1	chr12	27521194	27533337	+	hsa_circ_1111964	circBase	NM_121183	ARNTL2	exonic	453
chr12:27867713-27877119+	2	1	1	2	1	2	chr12	27867712	27877119	+	hsa_circ_1111384	circBase	NM_121821	MRPS35	exonic	411	T-cell leukemia, acute lymphoblastic leukemia (ALL), acute myeloid leukemia (AML), asthma, breast cancer, colorectal cancer, epithelial ovarian cancer (EOC), glioma, hepatocellular carcinoma (HCC), pancreatic ductal adenocarcinoma (PDAC)
chr12:27867713-27891541+	2	1	1	1	1	1	chr12	27867712	27891541	+	hsa_circ_1119117	circBase	NM_121821	MRPS35	exonic	591
chr12:2791821-2791778-	1	1	1	1	3	1	chr12	2791819	2791778	-	hsa_circ_1198282	circBase	NR_145725	CACNA1C-AS1	intronic	959
chr12:27948375-27948525+	1	1	1	1	3	1	chr12	27948374	27948525	+		novel	ENST11111381271	KLHL42	intronic	151
chr12:28363896-28412375+	1	1	2	1	1	1	chr12	28363895	28412375	+	hsa_circ_1198285	circBase	ENST11111541794	CCDC91	intronic	48481
chr12:28418514-28412375+	1	1	4	1	2	1	chr12	28418513	28412375	+	hsa_circ_1111387	circBase	ENST11111543534	CCDC91	exonic	215	Alzheimer's disease, bladder cancer, cardiac hypertrophy, epithelial ovarian cancer (EOC), hepatocellular carcinoma (HCC), pituitary adenoma, prostate cancer, schizophrenia
chr12:28418514-28461682+	2	1	2	1	8	2	chr12	28418513	28461682	+	hsa_circ_1198286	circBase	ENST11111545336	CCDC91	exonic	672
chr12:28458582-28461682+	7	1	11	3	17	9	chr12	28458581	28461682	+	hsa_circ_1117723	circBase	NM_118318	CCDC91	exonic	467
chr12:28458582-28544344+	6	1	1	1	13	3	chr12	28458581	28544344	+	hsa_circ_1118251	circBase	NM_118318	CCDC91	exonic	653
chr12:2929252-2931958+	2	1	1	1	1	4	chr12	2929251	2931958	+	hsa_circ_1111374	circBase	NM_118463	ITFG2	exonic	542
chr12:29446233-29451133+	1	1	1	1	1	2	chr12	29446232	29451133	+	hsa_circ_1125751	circBase	NM_118199	FAR2	exonic	356
chr12:29492784-29494151-	3	1	1	2	1	1	chr12	29492783	29494151	-	hsa_circ_1198315	circBase	NM_116571	ERGIC2	sense overlapping	1368
chr12:29492784-29498473-	1	1	2	1	1	1	chr12	29492783	29498473	-		novel	NM_116571	ERGIC2	sense overlapping	5691
chr12:31231879-31231471+	2	1	1	1	1	1	chr12	31231878	31231471	+		novel	ENST11111535317	DDX11	exonic	492
chr12:31586189-31611713-	1	1	1	3	1	1	chr12	31586188	31611713	-	hsa_circ_1125822	circBase	NM_144973	DENND5B	exonic	477
chr12:31595719-31611713-	1	1	1	4	1	1	chr12	31595718	31611713	-	hsa_circ_1118445	circBase	NM_144973	DENND5B	exonic	383
[truncated: 6,912 more rows]
