# Supplementary material for: Profiling and functional analysis of exosomal circRNAs from EBV-associated gastric carcinoma CSCs
Source: Research Square preprint supplement (doi:10.21203/rs.3.rs-6704451/v1), 2025-06-12
Supplement: Supplementary file 2 [file 57c621adf0ad0c38a8cdd84e.xlsx]

## Sheet: up_SNU-4th_vs_SNU-719
Differentially expressed circRNAs for: up_SNU4th-Exo_vs_SNU719-Exo Fold Change cut-off: 2.00 P-value cut-off: 0.05 Column A: CircRNAID, the ID of the identified circRNA by DCC. Column B~D: Fold and P Value for differentially expressed circRNAs. Column E ~ J: junction reads, the junction read number of each sample. Column K: circBaseID, the identifier of circBase (http://www.circbase.org). Column …
CircRNAID	Fold	P Value	regulation	SNU719			SNU4th			circBaseID	source	best_transcript	GeneName	Catalog
				Exo1	Exo2	Exo3	Exo1	Exo2	Exo3
chr18:46889531-46916128-	17.8889	0.000174353	up	5	2	2	53	74	34	hsa_circ_1111849	circBase	NM_117653	DYM	exonic
chr2:32142995-32157214-	17.8333	0.000326735	up	2	1	3	42	20	45	hsa_circ_1117385	circBase	NM_115955	MEMO1	exonic
chr3:149563798-149639014+	17.3333	0.0004621124366986	up	1	4	1	40	28	36	hsa_circ_1113956	circBase	ENST11111474348	RNF13	exonic
chr11:7318854-7327916-	16.6923	0.000234423	up	4	3	6	97	65	55	hsa_circ_1111211	circBase	NM_111118139	SFMBT2	exonic
chr2:37543381-37544322-	16.5714	0.000417799	up	2	1	4	29	25	62	hsa_circ_1111992	circBase	ENST11111379166	PRKD3	exonic
chr2:29129326-29137174+	16.3333	0.000158186	up	2	3	1	48	31	19	hsa_circ_1112125	circBase	NM_115131	WDR43	exonic
chr11:33317959-33319157+	16.2083	0.000283647	up	12	7	5	142	109	138	hsa_circ_1111284	circBase	NM_115734	HIPK3	exonic
chr6:86267694-86284196-	16	0.00406717	up	1	1	1	20	10	18	hsa_circ_1111617	circBase	NM_121468	SNX14	exonic
chr7:716866-751164-	15.8	0.000163964	up	1	1	3	20	44	15	hsa_circ_1118139	circBase	NM_112735	PRKAR1B	exonic
chr9:111781571-111788733+	14.3333	0.00457693	up	1	1	1	20	8	15	hsa_circ_1114136	circBase	T363596	G185884	sense overlapping
chr12:1136914-1137738+	13	0.00313347	up	1	1	2	16	20	16	hsa_circ_1111373	circBase	NM_178139	ERC1	exonic
chr11:51198624-51119918+	12.6667	0.0060973	up	1	1	1	18	10	10		novel	NM_121945	WDFY4	exonic
chr19:34685383-34716566+	12.5	0.000269465	up	1	1	2	30	10	10	hsa_circ_1118131	circBase	NM_115578	LSM14A	exonic
chr6:32489682-32522748-	12.5	0.00211823	up	1	1	2	17	15	18		novel	NM_112125	HLA-DRB5	sense overlapping
chr11:77824932-77825438-	11.8333	0.000211185	up	2	2	2	20	33	18	hsa_circ_1123785	circBase	NM_124179	ALG8	exonic
chr4:83799883-83813191-	11.6667	0.00648793	up	1	1	1	17	10	8	hsa_circ_1111421	circBase	NM_114933	SEC31A	exonic
chr2:95814631-95819114-	11.5	0.00276775	up	1	1	2	10	10	26	hsa_circ_1121214	circBase	NM_132788	ZNF514	sense overlapping
chr15:94841431-94841959+	11.3333	0.0083809	up	1	1	1	14	10	10	hsa_circ_1111657	circBase	NM_118349	MCTP2	exonic
chr11:118211941-118212764+	10.6667	0.010313	up	1	1	1	12	10	10	hsa_circ_1124235	circBase	NM_111151	ATM	exonic
chr22:47371186-47433194+	10.3333	0.0100546	up	1	1	1	10	13	8	hsa_circ_1112416	circBase	NM_114346	TBC1D22A	exonic
chr19:19613115-19613521+	10	0.0108275	up	1	1	1	10	8	12	hsa_circ_1116814	circBase	NM_117661	GATAD2A	exonic
chr5:73136315-73136585+	9	0.0139955	up	1	1	1	10	10	7	hsa_circ_1115777	circBase	NM_111181479	ARHGEF28	exonic
chr2:149519351-149522715+	8.33333	0.0156334	up	1	1	1	13	6	6	hsa_circ_1111175	circBase	NM_115631	EPC2	exonic
chr18:76856476-76886375+	7.75	0.0126128	up	1	2	1	12	8	11	hsa_circ_1112485	circBase	NM_198531	ATP9B	exonic
chr11:18312989-18313566-	7	0.0125032	up	1	2	1	7	13	8	hsa_circ_1111279	circBase	NM_117216	HPS5	exonic
chr1:91475647-91484343+	7	0.0224463	up	1	1	1	14	3	4	hsa_circ_1114412	circBase	NM_182976	ZNF326	exonic
chr2:121885264-121913865+	6.875	0.00177477	up	3	3	2	18	14	23	hsa_circ_1156281	circBase	NM_121919	EPB41L5	exonic
chr5:167927596-167929111+	6.2	0.0132132	up	1	2	2	18	6	7	hsa_circ_1117958	circBase	NM_112887	RARS	exonic
chr5:133493398-133519713-	6.2	0.0230592	up	2	2	1	9	9	13	hsa_circ_1114145	circBase	NM_116931	SKP1	sense overlapping
chr13:42385361-42417667-	6	0.0137292	up	2	1	1	6	10	8	hsa_circ_1116149	circBase	NM_115158	VWA8	exonic
chr3:61617644-61619229+	6	0.0160327	up	2	1	1	6	8	10	hsa_circ_1116226	circBase	ENST11111295874	PTPRG	intronic
chr1:178745817-178754742+	6	0.0208863	up	1	2	1	9	6	9	hsa_circ_1111162	circBase	NM_152663	RALGPS2	exonic
chr3:131649261-131661543+	6	0.0257863	up	2	1	1	8	6	10	hsa_circ_1115797	circBase	NM_114382	ATP2C1	exonic
chr18:55833121-55919286+	5.83333	0.011088	up	1	2	3	16	11	8	hsa_circ_1118713	circBase	NM_115277	NEDD4L	exonic
chr2:121885264-121932576+	5.71429	0.0105638	up	2	2	3	15	15	10	hsa_circ_1116834	circBase	NM_121919	EPB41L5	sense overlapping
chr8:111286426-111287482+	5.5	0.00663746	up	1	2	5	12	15	17	hsa_circ_1114366	circBase	NM_117891	VPS13B	exonic
chr18:29412147-29419421-	5.25	0.0172012	up	2	1	1	8	8	5	hsa_circ_1113815	circBase	NM_114939	TRAPPC8	exonic
chr3:23997528-24111316+	5.2	0.0148086	up	1	2	2	8	10	8	hsa_circ_1123337	circBase	NR_111524	NR1D2	exonic
chr4:76725287-76726456+	5	0.0311622	up	1	1	1	8	4	3	hsa_circ_1118757	circBase	NM_113715	USO1	exonic
chr2:171411231-171413817-	4.66667	0.0274836	up	2	2	2	12	10	6	hsa_circ_1111181	circBase	NM_124622	FASTKD1	exonic
chr5:96314842-96333849+	4.66667	0.0308732	up	1	1	1	1	6	7	hsa_circ_1111513	circBase	NM_115575	LNPEP	exonic
chr3:71191479-71196246-	4.6	0.0171337	up	2	2	1	10	5	8	hsa_circ_1124554	circBase	NM_132682	FOXP1	exonic
chr5:98214199-98218259-	4.5	0.0102233	up	3	3	2	18	10	8	hsa_circ_1173486	circBase	NM_111271	CHD1	exonic
chr14:116219356-116237691-	4.4	0.0284189	up	2	1	2	10	8	4		novel		FUT8	intergenic
chr5:61745754-61747761+	4.33333	0.0351818	up	1	1	1	6	2	5	hsa_circ_1117915	circBase	NM_116338	IPO11	exonic
chr7:91355881-91419967+	4.25	0.0135889	up	3	3	2	12	12	10	hsa_circ_1118645	circBase	NM_111287135	CDK14	exonic
chrX:11131485-11147844+	4.22222	0.012596	up	3	2	4	16	10	12	hsa_circ_1114663	circBase	NM_115691	WWC3	exonic
chr11:113866793-113871983-	4.16667	0.0209252	up	3	2	1	15	4	6	hsa_circ_1194769	circBase	NM_125218	PDGFD	exonic
chr14:112659811-112661457+	4	0.0349119	up	1	1	1	6	4	2	hsa_circ_1111569	circBase	ENST11111499851	WDR21	exonic
chr12:58341778-58347472+	4	0.0363839	up	1	1	1	3	3	6	hsa_circ_1111412	circBase	NM_133276	XRCC6BP1	exonic
chr11:78714531-78729825-	3.83333	0.0198828	up	2	3	1	5	11	7	hsa_circ_1116561	circBase	NM_112247	KCNMA1	exonic
chr14:66128155-66128484+	3.81818	0.0201838	up	8	8	6	45	26	13	hsa_circ_1113128	circBase	NM_178155	FUT8	exonic
chr11:51134716-51136941+	3.8	0.0286842	up	2	1	2	8	6	5		novel	NM_121945	WDFY4	exonic
chr19:21718856-21728782-	3.8	0.0382771	up	2	1	2	8	6	5	hsa_circ_1119283	circBase	NM_111159293	ZNF737	sense overlapping
chr13:51125689-51142196+	3.75	0.0493763	up	1	2	1	4	1	10	hsa_circ_1131254	circBase	NM_131915	SETDB2	exonic
chr1:211729967-211784772+	3.66667	0.0388809	up	4	1	1	16	2	4	hsa_circ_1115839	circBase	NM_213459	CAMSAP2	exonic
chr4:499517-511655+	3.66667	0.0446056	up	1	1	1	1	6	4	hsa_circ_1126566	circBase	ENST11111511448	PIGG	exonic
chrX:46511545-46513141-	3.66667	0.0497759	up	1	1	1	2	5	4	hsa_circ_1114357	circBase	ENST11111489574	SLC9A7	intronic
chr3:149563798-149639114+	3.65116	0.00092843	up	12	16	15	76	55	26	hsa_circ_1111346	circBase	NM_117282	RNF13	exonic
chr11:71143555-71145885-	3.6	0.0326606	up	2	1	2	11	2	5	hsa_circ_1118514	circBase	NM_117987	RUFY2	exonic
chr12:25171168-25179811+	3.5	0.0237059	up	1	1	2	2	2	10		novel	ENST11111556161	RP11-713N11.5	sense overlapping
chr5:142779221-142781417-	3.5	0.0298376	up	2	5	1	7	9	12	hsa_circ_1111543	circBase	NM_111176	NR3C1	exonic
chr5:122137564-122139318+	3.42857	0.018599	up	3	2	2	6	8	10	hsa_circ_1173692	circBase	NM_113111	SNX2	exonic
chr2:63661879-63667115-	3.4	0.0313579	up	2	2	1	4	5	8	hsa_circ_1113497	circBase	NM_115911	WDPCP	exonic
chr14:51611888-51625364-	3.33333	0.0423708	up	1	1	1	3	5	2	hsa_circ_1111989	circBase	NM_116939	SOS2	exonic
chr1:31452919-31468167-	3.28571	0.0308162	up	3	10	1	13	9	24	hsa_circ_1112452	circBase	NM_114676	PUM1	exonic
chr3:56713728-56717753-	3.25	0.0343328	up	2	1	1	5	3	5	hsa_circ_1111316	circBase	NM_111112736	FAM218A	exonic
chr5:176371336-176378578-	3.25	0.0343328	up	1	2	1	5	5	3	hsa_circ_1114491	circBase	NM_116291	UIMC1	exonic
chr18:13148858-13159311+	3.25	0.0343328	up	1	2	1	3	5	5	hsa_circ_1147121	circBase	NM_132142	CEP192	exonic
chr13:49742749-49752791+	3.2	0.0241412	up	4	3	3	18	8	6	hsa_circ_1116978	circBase	NM_114923	FNDC3A	exonic
chr4:117192252-117133992-	3.14286	0.024508	up	3	2	2	8	10	4	hsa_circ_1117541	circBase	NM_111291768	TBCK	exonic
chr6:32487215-32549391-	3.125	0.0119312	up	2	3	3	7	6	12		novel	NM_112124	HLA-DRB1	sense overlapping
chr11:5815815-5842668-	3.05	0.0453815	up	11	4	5	30	16	15	hsa_circ_1117586	circBase	NM_111494	GDI2	exonic
chr21:43623731-43629994+	3	0.0284189	up	3	2	2	8	8	5	hsa_circ_1161531	circBase	NM_116282	STK4	exonic
chr11:32741521-32762951+	3	0.0296134	up	2	2	2	8	6	4	hsa_circ_1193546	circBase	NM_145123	CCDC7	exonic
chr1:118454616-118461358-	3	0.0449138	up	2	1	1	4	5	3	hsa_circ_1113755	circBase	NM_117686	GDAP2	exonic
chr14:66188493-66211199+	3	0.0456929	up	1	1	1	5	3	1	hsa_circ_1132249	circBase	NM_114481	FUT8	exonic
chr1:172525119-172539871+	3	0.0493763	up	1	1	1	3	4	2	hsa_circ_1111166	circBase	NM_114283	SUCO	exonic
chr5:64747312-64769779-	3	0.00870877	up	1	1	1	2	5	2	hsa_circ_1172688	circBase	NM_197941	ADAMTS6	exonic
chr18:12999421-13142333+	3	0.015011	up	3	2	1	5	9	4	hsa_circ_1146999	circBase	NM_132142	CEP192	exonic
chr18:51797731-51811461+	3	0.0462151	up	3	1	1	1	12	2	hsa_circ_0007180	circBase	NM_007195	POLI	exonic
chr2:121885264-121932581+	2.875	0.00020589	up	3	2	3	6	5	12	hsa_circ_1118278	circBase	NM_121919	EPB41L5	sense overlapping
chr16:47531311-47581459+	2.875	0.0308454	up	3	3	2	7	7	9	hsa_circ_1114791	circBase	NM_111293	PHKB	exonic
chr11:7839111-7844817+	2.87179	0.00746255	up	11	16	12	41	43	28	hsa_circ_1117292	circBase	NM_115174	ATP5C1	exonic
chr16:24979672-24981911-	2.85714	0.0329545	up	2	3	2	8	8	4	hsa_circ_1114261	circBase	NM_118154	ARHGAP17	exonic
chr14:64988215-64991121+	2.8	0.0423256	up	2	2	1	5	2	7	hsa_circ_1112421	circBase	NM_114951	ZBTB1	exonic
chr11:91469684-91477479+	2.78571	0.0129294	up	2	5	7	17	12	10		novel	NM_116195	KIF21B	exonic
chr3:61618137-61619229+	2.76923	0.024508	up	4	6	3	12	10	14	hsa_circ_1112134	circBase	ENST11111295874	PTPRG	intronic
chr19:47646751-47658471+	2.75	0.0385409	up	1	2	1	6	2	3	hsa_circ_1112444	circBase	NM_115511	SAE1	exonic
chr19:33392151-33416423-	2.75	0.0408895	up	2	1	1	5	3	3	hsa_circ_1119431	circBase	NM_132816	CEP89	exonic
chr1:246794661-246795226+	2.75	0.0446056	up	2	1	1	3	6	2	hsa_circ_1112858	circBase	NM_152619	CNST	sense overlapping
chr11:94178976-94181614-	2.75	0.0493763	up	1	1	2	3	4	4	hsa_circ_1124137	circBase	NM_115591	MRE11A	exonic
chr16:3911298-3911111-	2.75	0.0428878	up	2	1	1	5	5	1	hsa_circ_1117637	circBase	NM_114381	CREBBP	exonic
chr11:44129233-44135851+	2.71429	0.0301542	up	3	2	2	4	7	8	hsa_circ_1119118	circBase	NM_111411	EXT2	exonic
chr5:6737623-6746541+	2.71429	0.0366668	up	4	2	1	10	2	7	hsa_circ_1118913	circBase	NM_116999	PAPD7	exonic
chr16:85112795-85115611-	2.7	0.0203954	up	5	3	2	5	8	14	hsa_circ_1141719	circBase	NM_117741	ZDHHC7	exonic
chr5:76758921-76761634-	2.69231	0.0210834	up	2	5	6	15	8	12	hsa_circ_1111498	circBase	NM_118268	WDR41	exonic
chr2:68717322-68815135+	2.66667	0.0322089	up	3	1	2	7	7	2	hsa_circ_1121811	circBase	NM_173545	APLF	sense overlapping
chr16:51321823-51322261+	2.66667	0.0322089	up	2	1	3	4	5	7	hsa_circ_1111699	circBase	NM_111114	ADCY7	exonic
chr6:159197441-159211413-	2.66667	0.0460561	up	1	1	1	3	1	4	hsa_circ_1178538	circBase	NM_113379	EZR	exonic
chr15:41648237-41669512+	2.66667	0.0460561	up	1	1	1	3	1	4	hsa_circ_1118346	circBase	NM_116359	NUSAP1	exonic
chr4:52729613-52744121+	2.66667	0.0325081	up	8	2	2	10	10	12	hsa_circ_1111411	circBase	NM_115115	DCUN1D4	exonic
chr12:11199619-11273779-	2.6	0.0345977	up	2	2	1	4	5	4	hsa_circ_1118221	circBase	T173922	G116941	exonic
chr1:21548241-21554534-	2.6	0.0385409	up	2	1	2	6	3	4	hsa_circ_1111127	circBase	NM_111397	ECE1	exonic
chr16:48381418-48382211+	2.6	0.0413145	up	2	1	2	2	9	2	hsa_circ_1115813	circBase	NM_131491	LONP2	exonic
chr7:27668991-27672164-	2.6	0.044517	up	3	1	1	5	6	2	hsa_circ_1113958	circBase	NM_152741	HIBADH	exonic
chr6:32441169-32496891-	2.54545	0.0198828	up	3	5	3	10	10	8		novel	NM_112125	HLA-DRB5	sense overlapping
chr16:17352845-17353355-	2.5	0.0438489	up	1	2	1	2	7	1	hsa_circ_1113559	circBase	NM_122166	XYLT1	exonic
chr6:111148312-111164975+	2.5	0.0446056	up	2	1	1	1	7	2	hsa_circ_1131294	circBase	NM_114845	FIG4	exonic
chr5:111222147-111231489-	2.5	0.0456929	up	1	4	1	7	5	3	hsa_circ_1127414	circBase	NM_115668	ST8SIA4	exonic
chr14:41111917-41125112+	2.5	0.0235506	up	2	3	1	8	2	5	hsa_circ_1111819	circBase	T113314	G124356	sense overlapping
chr6:131515248-131515768-	2.5	0.0456617	up	2	2	2	1	11	3	hsa_circ_1118833	circBase	NM_111117373	SAMD3	exonic
chr3:67546222-67559327-	2.5	0.0167784	up	3	1	2	2	11	2	hsa_circ_1114276	circBase	NM_113848	SUCLG2	exonic
chr3:71164711-71112924-	2.46154	0.0228463	up	5	4	4	10	13	9	hsa_circ_1111321	circBase	NM_132682	FOXP1	exonic
chr7:139159147-139161912+	2.42857	0.0322089	up	4	1	2	4	4	9	hsa_circ_1133531	circBase	NM_111271643	LUC7L2	exonic
chr3:149563798-149619949+	2.42857	0.0416438	up	2	2	3	5	8	4	hsa_circ_1114565	circBase	NM_117282	RNF13	exonic
chr4:3188666-3119151+	2.42857	0.0194156	up	2	2	3	4	10	3	hsa_circ_1111392	circBase	ENST11111355172	HTT	exonic
chr18:2891559-2892484+	2.42857	0.0185385	up	10	2	2	8	10	16	hsa_circ_1114658	circBase	NM_132148	EMILIN2	exonic
chr15:44116699-44117272-	2.4	0.0363518	up	1	3	1	8	2	2		novel	NM_115926	MFAP1	exonic
chr1:33197428-33199711-	2.4	0.0399179	up	2	2	1	3	6	3	hsa_circ_1113163	circBase	NM_111318138	ZBTB8OS	exonic
chr13:21974512-21999817-	2.4	0.0493763	up	1	2	2	6	4	2	hsa_circ_1129718	circBase	NM_153251	ZDHHC21	exonic
chrX:24191832-24197887+	2.4	0.0380809	up	2	1	2	6	2	4	hsa_circ_1117118	circBase	NM_113411	ZFX	exonic
chr11:86177527-86198463+	2.375	0.0479821	up	6	1	1	5	11	3	hsa_circ_1113118	circBase	NM_118999	CCSER2	exonic
chr21:38792611-38794168+	2.375	0.0301713	up	2	2	4	1	6	12	hsa_circ_1111191	circBase	uc131rvi.1	DYRK1A	exonic
chr21:35457457-35467844-	2.36364	0.0395679	up	3	5	3	10	8	8	hsa_circ_1161219	circBase	NM_181627	SOGA1	exonic
chr7:114582331-114619836+	2.33333	0.0286842	up	4	3	2	8	8	5	hsa_circ_1117721	circBase	NM_111166345	MDFIC	exonic
chr9:96233423-96238621+	2.33333	0.0419294	up	2	2	2	5	1	8	hsa_circ_1118193	circBase	NM_114612	FAM121A	exonic
chr15:94899366-94928754+	2.3	0.0227694	up	2	4	4	6	12	5		PMID:25242744	NM_118349	MCTP2	exonic
chr11:126631126-126655351+	2.28571	0.0434039	up	2	4	1	8	6	2	hsa_circ_1118915	circBase	uc111qug.2	ZRANB1	exonic
chrX:79962926-79975155-	2.28571	0.0138864	up	2	5	7	14	8	10	hsa_circ_0001936	circBase	NM_153252	BRWD3	exonic
chr5:95191111-95199324+	2.27586	0.00416601	up	16	10	3	30	15	21	hsa_circ_1117444	circBase	NM_114899	RHOBTB3	exonic
chrX:147733521-147744289+	2.27273	0.0212665	up	3	1	7	6	4	15	hsa_circ_1191669	circBase	NM_112125	AFF2	exonic
chr21:61714131-61716111-	2.25	0.0253634	up	11	6	3	23	10	12	hsa_circ_1113456	circBase	NM_112792	PSMA7	exonic
chr1:151611364-151641111+	2.25	0.0326289	up	3	2	3	10	2	6	hsa_circ_0000131	circBase	NM_030918	SNX27	exonic
chr11:126631126-126651977+	2.25	0.0337647	up	2	2	4	6	4	8	hsa_circ_1114451	circBase	NM_117581	ZRANB1	sense overlapping
chr11:1131343-1142186+	2.25	0.0408895	up	1	2	1	5	2	2	hsa_circ_1111216	circBase	NM_114123	WDR37	exonic
chr18:72997413-73111613+	2.25	0.0408895	up	1	2	1	2	5	2	hsa_circ_1112895	circBase	NM_115786	TSHZ1	sense overlapping
chrY:14821321-14834121+	2.25	0.0456929	up	1	2	1	4	3	2	hsa_circ_1116311	circBase	NM_114654	USP9Y	exonic
chr8:48318936-48321523+	2.22222	0.0398275	up	6	5	7	15	13	12	hsa_circ_1111798	circBase	NM_111181394	SPIDR	exonic
chr12:69759413-69764755+	2.2	0.0322089	up	5	3	2	10	7	5	hsa_circ_1199117	circBase	NM_116531	YEATS4	exonic
chr18:21713798-21715514+	2.2	0.0413145	up	2	1	2	2	7	2	hsa_circ_1147285	circBase	NM_153211	TTC39C	exonic
chr12:62768171-62775111+	2.2	0.0413145	up	2	2	1	2	8	1		novel	ENST11111281377	USP15	intronic
chr19:5614594-5614947-	2.1875	0.0129132	up	6	6	4	12	13	10	hsa_circ_1111881	circBase	NM_114649	SAFB2	exonic
chr8:54916228-54923152-	2.18182	0.0408895	up	2	8	1	12	4	8	hsa_circ_1117811	circBase	NM_116756	TCEA1	exonic
chr22:46185592-46114373+	2.16667	0.0493763	up	1	2	3	6	4	3	hsa_circ_1113154	circBase	NM_113236	ATXN11	exonic
chr19:5147487-5182515+	2.16667	0.0474307	up	1	4	1	9	1	3		circBase	NM_115115	KDM4B	exonic
chr18:56363598-56367823+	2.16667	0.0397365	up	2	2	2	2	3	8		novel	NM_116785	MALT1	exonic
chr4:77155328-77165626-	2.15385	0.047866	up	12	4	10	28	16	12	hsa_circ_1171139	circBase	NM_117426	NUP54	exonic
chr3:71191479-71112924-	2.15	0.0436767	up	25	10	5	33	25	28	hsa_circ_1118234	circBase	NM_132682	FOXP1	exonic
chr7:21193816-21211493-	2.14286	0.0424212	up	2	2	3	5	4	6	hsa_circ_1179534	circBase	NM_182762	MACC1	exonic
chr13:96375496-96377516+	2.14286	0.0170417	up	2	1	4	3	3	9	hsa_circ_1112473	circBase	NM_116261	DNAJC3	exonic
chr11:18312989-18314523-	2.14286	0.0225376	up	1	2	4	9	5	1	hsa_circ_1111281	circBase	NM_117216	HPS5	exonic
chr3:18419662-18462483-	2.125	0.0423708	up	11	2	3	13	5	16	hsa_circ_1164555	circBase	NM_112971	SATB1	exonic
chr6:32487215-32549391-	2.125	0.0108255	up	11	8	5	18	21	12		novel	NM_112124	HLA-DRB1	sense overlapping
chr3:157839892-157841781+	2.11111	0.0429133	up	3	3	3	6	6	7	hsa_circ_1111355	circBase	NM_116625	RSRC1	exonic
chrX:53672263-53681175-	2.09091	0.00235505	up	2	8	1	6	3	14	hsa_circ_1117817	circBase	NM_131417	HUWE1	exonic
chr17:45479498-45492285+	2.08824	0.0261837	up	11	15	8	16	21	34	hsa_circ_1111778	circBase	NM_152347	EFCAB13	exonic
chr4:186168448-186219236+	2.08333	0.0332073	up	5	5	2	10	6	9	hsa_circ_1113237	circBase	NM_131953	SNX25	exonic
chr14:99924616-99932151-	2.04545	0.0248625	up	2	13	7	14	11	20	hsa_circ_1111567	circBase	NM_132233	SETD3	exonic
chr8:124189351-124196581+	2	0.0349119	up	1	3	2	5	3	4	hsa_circ_1185438	circBase	NM_145647	TBC1D31	exonic
chr19:31462111-31513438+	2	0.0446056	up	1	2	1	5	2	1	hsa_circ_1119356	circBase	NM_113796	URI1	exonic
chr16:27445668-27449118+	2	0.0489105	up	1	2	1	2	1	5	hsa_circ_1138728	circBase	NM_121798	IL21R	exonic
chr21:38792611-38845182+	2	0.0207513	up	5	4	5	9	8	11	hsa_circ_1115955	circBase	NM_111395	DYRK1A	exonic
chr17:81417868-81431574+	2	0.0455049	up	1	1	5	10	2	2	hsa_circ_1146419	circBase	NM_112336	NARF	exonic
chr4:38191553-38114778+	2	0.0179015	up	3	10	10	10	18	18	hsa_circ_1111412	circBase	NM_115173	TBC1D1	exonic
chr5:124136717-124136962-	2	0.0489637	up	4	4	6	10	10	8	hsa_circ_1111523	circBase	NM_121747	ZNF618	exonic
chr2:61749746-61753656-	2	0.0183736	up	18	11	12	28	30	24	hsa_circ_1111116	circBase	NM_113411	XPO1	exonic

## Sheet: down_SNU-4th_vs_SNU-719
Differentially expressed circRNAs for: down_SNU4th-Exo_vs_SNU719-Exo Fold Change cut-off: 2.00 P-value cut-off: 0.05 Column A: CircRNAID, the ID of the identified circRNA by DCC. Column B~D: Fold and P Value for differentially expressed circRNAs. Column E ~ J: junction reads, the junction read number of each sample. Column K: circBaseID, the identifier of circBase (http://www.circbase.org). Colum…
CircRNAID	Fold	P Value	regulation	SNU719			SNU4th			circBaseID	source	best_transcript	GeneName	Catalog
				Exo1	Exo2	Exo3	Exo1	Exo2	Exo3
chr11:121348827-121431366+	-18.6667	0.000627345	down	5	12	39	1	1	1		novel	NM_003105	SORL1	exonic
chr22:39425847-39445938+	-12.6667	0.000334632	down	18	14	6	1	1	1		novel	NM_145298	APOBEC3F	sense overlapping
chr6:29911995-29911251+	-12.3333	0.000972677	down	16	19	2	1	1	1		novel	uc111dmb.3	HLA-G	intronic
chr6:76344423-76373234+	-10.3333	0.00354464	down	12	11	9	1	1	1	hsa_circ_0077083	circBase	NM_015571	SENP6	exonic
chr12:459787-465713-	-9.66667	0.00538406	down	12	15	2	1	1	1	hsa_circ_0024946	circBase	NM_001042603	KDM5A	exonic
chr14:103336522-103363738+	-7.66667	0.0151335	down	18	3	2	1	1	1	hsa_circ_0101323	circBase	NM_003300	TRAF3	exonic
chr7:142168796-142242574-	-7	0.0227183	down	4	8	9	1	1	1		novel	uc011krx.2	BV13S6J2.1	intronic
chr16:68919157-68914533+	-6.33333	0.0435719	down	2	1	16	1	1	1	hsa_circ_0040000	circBase	NM_024562	TANGO6	exonic
chr5:78915435-78919312+	-6.2	0.0108633	down	15	8	8	1	3	1	hsa_circ_0001504	circBase	NM_173797	PAPD4	exonic
chr11:28872328-28879761+	-6	0.0161206	down	8	5	5	1	1	1	hsa_circ_1118154	circBase	NM_116628	WAC	exonic
chr9:117513237-117521452+	-5.75	0.0108633	down	10	5	8	1	1	2	hsa_circ_1137616	circBase	NM_115469	NIPSNAP3A	exonic
chr22:31366965-31375141+	-5.5	0.0158089	down	6	6	10	2	1	1	hsa_circ_1116313	circBase	NM_121191	MTMR3	exonic
chr17:48814321-48819192+	-5.33333	0.0106619	down	8	4	4	1	1	1	hsa_circ_1117141	circBase	NM_116117	LUC7L3	exonic
chr1:14114913-14119326+	-5.33333	0.026291	down	2	4	10	1	1	1	hsa_circ_1111129	circBase	NM_112231	PRDM2	exonic
chr2:55432741-55439942-	-5	0.0173985	down	5	7	8	2	1	1		novel	ENST11111416437	CLHC1	intronic
chr11:11212225-11212444+	-5	0.0289853	down	8	6	1	1	1	1		novel	ENST11111315874	CELF2	intronic
chr17:35771356-35814871+	-4.33333	0.0291019	down	6	5	2	1	1	1	hsa_circ_1143274	circBase	NM_111488	TADA2A	exonic
chr16:53189838-53191453+	-4.33333	0.0292191	down	5	4	4	1	1	1	hsa_circ_1139353	circBase	NM_125134	CHD9	exonic
chr2:119418131-119429383+	-4	0.0294551	down	4	4	4	1	1	1	hsa_circ_0116988	circBase	NM_144978	CCDC138	exonic
chr15:93496587-93499879+	-3.8	0.0165831	down	10	6	3	2	2	1	hsa_circ_1136984	circBase	NM_111271	CHD2	exonic
chr12:111456151-111466447+	-3.75	0.0296933	down	6	5	4	1	2	1	hsa_circ_1197229	circBase	NM_133121	ANKRD13A	exonic
chr19:45691589-45691998+	-3.71429	0.0385334	down	10	7	9	4	2	1	hsa_circ_1119717	circBase	ENST11111593183	AC115779.2	exonic
chr11:8987451-8989588+	-3.66667	0.0407628	down	2	10	10	4	1	1	hsa_circ_1196714	circBase	NR_173431	TMEM9B-AS1	exonic
chr11:116879949-116889297+	-3.57143	0.00538406	down	10	12	3	3	2	2	hsa_circ_1121193	circBase	NM_217313	ATRNL1	exonic
chr2:218589524-218617166+	-3.5	0.0296933	down	7	1	6	1	2	1	hsa_circ_1112556	circBase	NM_152523	CCNYL1	exonic
chr12:9554343-9561545-	-3.5	0.0296933	down	14	1	6	1	1	4		novel	uc121qus.1	DQ599813	sense overlapping
chr2:191584298-191585513+	-3.42857	0.017465	down	10	6	8	2	2	3	hsa_circ_1118367	circBase	NM_144718	ANKAR	exonic
chr3:51575514-51586179+	-3.38095	0.000123404	down	12	27	32	10	8	3	hsa_circ_1111316	circBase	NM_115116	RAD54L2	sense overlapping
chr2:24361779-24369956+	-3.33333	0.0385334	down	5	3	2	1	1	1	hsa_circ_1119531	circBase	NM_111145711	FAM228B	exonic
chr11:51134716-51141754+	-3.33333	0.043916	down	6	1	3	1	1	1		novel	NM_121945	WDFY4	exonic
chr19:4177176-4179283-	-3.33333	0.0470884	down	2	2	6	1	1	1	hsa_circ_1148584	circBase	NM_116539	SIRT6	exonic
chr3:183361268-183391272+	-3.33333	0.0378694	down	2	6	2	1	1	1	hsa_circ_1111368	circBase	NM_117644	KLHL24	exonic
chr6:31236599-31321721-	-3.28571	0.0423129	down	3	10	10	2	4	1		novel	NM_112117	HLA-C	sense overlapping
chr6:31239631-31324718-	-3.25	0.023937	down	4	6	3	1	2	1		novel	NM_112117	HLA-C	sense overlapping
chr3:31686239-31715738+	-3.25	0.043916	down	2	8	3	2	1	1	hsa_circ_1164654	circBase	NM_113242	TGFBR2	exonic
chr18:61473259-61497464+	-3.25	0.0470884	down	5	3	5	2	1	1	hsa_circ_1118765	circBase	NM_194449	PHLPP1	sense overlapping
chr14:112356574-112378811+	-3.2	0.0289853	down	6	6	4	1	2	2		novel	NM_112719	PPP2R5C	exonic
chr19:6712138-6712591-	-3.16667	0.0422027	down	3	5	11	2	3	1	hsa_circ_1112131	circBase	NM_111164	C3	exonic
chr3:135816725-135822218+	-3.125	0.0173985	down	12	7	6	4	3	1		novel	NM_112718	PPP2R3A	exonic
chr17:48814321-48819192+	-3	0.0385334	down	5	2	2	1	1	1	hsa_circ_1117141	circBase	NM_116117	LUC7L3	exonic
chr19:23416533-23416711-	-3	0.0385334	down	6	7	2	2	2	1		novel	NR_145525	ZNF724P	sense overlapping
chr21:61484175-61491618-	-3	0.0385334	down	5	3	1	1	1	1		novel	NM_116612	TCFL5	sense overlapping
chr1:33193119-33111393-	-3	0.0385334	down	5	8	8	3	2	2	hsa_circ_1111424	circBase	NM_178547	ZBTB8OS	exonic
chr19:37198454-37111644+	-3	0.0449929	down	1	4	4	1	1	1	hsa_circ_1119517	circBase	NM_132825	ZNF382	exonic
chr1:11131957-11137115-	-3	0.0454257	down	2	3	4	1	1	1	hsa_circ_1119759	circBase	NM_112685	EXOSC11	exonic
chr11:114117893-114118317+	-2.875	0.0176663	down	14	5	4	3	2	3		novel	NM_114193	GBF1	sense overlapping
chr5:178994462-178996426+	-2.85714	0.0469636	down	4	8	8	3	1	3	hsa_circ_1175268	circBase	NM_125158	RUFY1	exonic
chr6:17665471-17676111-	-2.8	0.0238421	down	2	2	10	1	3	1	hsa_circ_1175734	circBase	NM_115124	NUP153	exonic
chr9:128677965-128697886+	-2.8	0.0470884	down	1	1	12	2	2	1	hsa_circ_1113991	circBase	NM_116195	PBX3	exonic
chr17:27217731-27216144-	-2.8	0.0431268	down	8	2	4	2	1	2		novel	NM_114475	FLOT2	exonic
chr11:114286846-114298189+	-2.75	0.0465913	down	2	4	5	2	1	1	hsa_circ_1112533	circBase	NM_145216	VTI1A	exonic
chr6:91916288-91962319-	-2.66667	0.0134579	down	14	3	7	4	2	3	hsa_circ_1132674	circBase	NM_121813	BACH2	exonic
chr12:116669864-116675511-	-2.66667	0.0289853	down	6	6	4	3	2	1		novel	NM_115335	MED13L	sense overlapping
chr2:55582715-55612119-	-2.66667	0.0385334	down	5	1	2	1	1	1	hsa_circ_1154622	circBase	NM_118184	CCDC88A	exonic
chr4:111412483-111427668+	-2.66667	0.0312789	down	5	2	1	1	1	1	hsa_circ_1171635	circBase	NM_116323	SEC24B	exonic
chr4:89583582-89618451+	-2.66667	0.0464681	down	1	5	2	1	1	1	hsa_circ_1127282	circBase	NM_114616	HERC3	exonic
chr1:145293517-145299875+	-2.66667	0.0472358	down	1	5	2	1	1	1		novel	NM_111277444	NBPF9	intronic
chr3:195615124-195615477-	-2.66667	0.0470237	down	1	5	2	1	1	1	hsa_circ_1111377	circBase	NM_115781	TNK2	exonic
chr5:125939262-125939875+	-2.6	0.0439163	down	1	9	3	1	3	1	hsa_circ_1127796	circBase	NM_132177	PHAX	exonic
chr3:71151123-71112924-	-2.6	0.0263764	down	3	7	3	2	1	2	hsa_circ_1166527	circBase	NM_132682	FOXP1	exonic
chr7:114925456-114937981-	-2.57143	0.0422027	down	4	4	10	2	4	1	hsa_circ_1113656	circBase	ENST11111461391	SRPK2	intronic
chr3:113285267-113314117+	-2.5	0.0240325	down	4	8	8	2	5	1		novel	NM_117699	SIDT1	exonic
chr5:71798426-71818255+	-2.5	0.0385334	down	7	2	1	2	1	1	hsa_circ_1129477	circBase	NM_118429	BDP1	exonic
chr9:37768173-37771736+	-2.5	0.0464681	down	2	6	2	2	1	1	hsa_circ_1187182	circBase	NM_144964	TRMT11B	exonic
chr6:144818684-144814592+	-2.42857	0.0267193	down	4	9	4	2	4	1	hsa_circ_1114826	circBase	NM_117124	UTRN	exonic
chr2:61515311-61511584-	-2.42857	0.03791	down	10	5	2	4	1	2		novel	NM_114719	USP34	exonic
chr2:32612656-32621661+	-2.4	0.0238421	down	2	2	8	1	1	3	hsa_circ_1153441	circBase	NM_116252	BIRC6	exonic
chr19:19756683-19757156-	-2.33333	0.0451117	down	8	3	3	2	2	2	hsa_circ_1151256	circBase	NM_121411	ATP13A1	exonic
chr6:149691145-149711654+	-2.33333	0.0110474	down	4	8	2	1	3	2	hsa_circ_1178211	circBase	NM_115193	TAB2	exonic
chr2:122215263-122216551-	-2.33333	0.0451117	down	5	7	2	1	4	1	hsa_circ_1156311	circBase	NM_115282	CLASP1	exonic
chr12:123141931-123142236+	-2.28571	0.0238421	down	4	2	10	4	2	1	hsa_circ_1112662	circBase	NM_114718	KNTC1	exonic
chr6:161173184-161173962+	-2.25	0.0241242	down	5	5	8	4	2	2		novel	ENST11111358372	WTAP	intronic
chr4:83799883-83802075-	-2.25	0.00322189	down	3	10	5	3	3	2	hsa_circ_1171253	circBase	NM_114933	SEC31A	exonic
chr11:95825156-95826681-	-2.25	0.0418626	down	1	6	2	1	1	2	hsa_circ_1124185	circBase	NM_132427	MAML2	exonic
chr19:16489583-16489824-	-2.2	0.0464681	down	3	5	3	1	1	3		novel	ENST11111248171	EPS15L1	intronic
chr12:47497896-47511947+	-2.2	0.0365815	down	5	3	3	2	2	1	hsa_circ_1114651	circBase	NM_111281429	PCED1B	sense overlapping
chr11:112697159-112711511+	-2.2	0.0452397	down	4	5	2	2	2	1	hsa_circ_1112145	circBase	NM_118121	SLF2	exonic
chr2:32312561-32341281+	-2.16667	0.046715	down	3	8	2	2	2	2	hsa_circ_1153418	circBase	NM_114946	SPAST	exonic
chr3:51575615-51586179+	-2.125	0.043916	down	10	3	4	2	4	2		novel	NM_115116	RAD54L2	sense overlapping
chr6:158994452-159146786+	-2.125	0.0469855	down	8	5	4	4	1	3	hsa_circ_1131215	circBase	NM_121823	TMEM181	exonic
chr13:99891681-99896878+	-2.1	0.043887	down	10	4	7	8	1	1	hsa_circ_1131721	circBase	NR_126644	UBAC2	exonic
chr2:98165882-98166177-	-2.04762	0.0468391	down	15	15	13	8	8	5		novel	NM_125191	ANKRD36B	exonic
chr6:161461592-161471684+	-2	0.0289853	down	2	6	2	1	3	1		novel	NM_111876	IGF2R	exonic
chr15:65773853-65782637-	-2	0.0424234	down	3	12	3	2	4	3	hsa_circ_1114288	circBase	NM_117743	DPP8	exonic
chr14:81227781-81259454-	-2	0.0489265	down	1	5	2	2	1	1		novel	NM_152446	CEP128	exonic
chr8:131192148-131114389-	-2	0.0467809	down	1	5	2	2	1	1	hsa_circ_1115718	circBase	NM_118482	ASAP1	exonic
chr2:197872531-197878436-	-2	0.0482631	down	2	5	1	1	1	2		novel	NM_111195144	ANKRD44	exonic
chr21:37621197-37623523+	-2	0.0490866	down	1	5	2	1	2	1	hsa_circ_1161369	circBase	NM_121931	DHX35	exonic
chr21:32524954-32525452-	-2	0.0480826	down	1	5	2	1	1	2	hsa_circ_1115781	circBase	NM_113253	TIAM1	exonic
chr4:145985724-146112912-	-2	0.041671	down	1	5	2	1	1	2	hsa_circ_1171153	circBase	NM_114885	ANAPC11	exonic
chr16:27357788-27364117+	-2	0.0437118	down	2	2	8	2	2	2	hsa_circ_1138724	circBase	NM_111418	IL4R	exonic
chr1:179316735-179319566+	-2	0.0468391	down	15	6	5	5	5	3	hsa_circ_1115454	circBase	NM_113111	SOAT1	exonic
chr15:91984738-91986711+	-2	0.0456656	down	8	8	4	2	5	3	hsa_circ_1111652	circBase	NM_113871	IQGAP1	exonic
chr6:16326625-16328711-	-2	0.00388547	down	18	11	11	6	6	8	hsa_circ_1117132	circBase	NM_111332	ATXN1	exonic
