# Supplementary material for: Profiling and functional analysis of exosomal circRNAs from EBV-associated gastric carcinoma CSCs
Source: Research Square preprint supplement (doi:10.21203/rs.3.rs-6704451/v1), 2025-06-12
Supplement: Supplementary file 3 [file 71553c91f33d8497ca1f5162.xlsx]

## Sheet: Sheet1
miRNA binded circRNA summary of binding sites between miRNA and target. Total: the number of binding sites. context+ score & context score: The context+ score & context score from TargetScan. Structure Score & Free Energy: The thermodynamic properties of the binding site from miRanda.
circRNA	miRNA	Total	Context+	Context	Structure	Energy
EBV:146233-150348+	ebv-miR-BART8-3p	4		0.139	567	-92.91
EBV:146233-150348+	ebv-miR-BART19-5p	2	-0.119	-0.27	326	-39.21
EBV:146233-150348+	ebv-miR-BART7-5p	2			306	-51.16
EBV:146233-150348+	ebv-miR-BART20-3p	2		0.049	306	-41.04
EBV:146233-150348+	ebv-miR-BART18-5p	2			302	-37.96
EBV:146233-150348+	ebv-miR-BART3-3p	2	-0.289	-0.197	301	-40.91
EBV:146233-150348+	ebv-miR-BART9-5p	2	-0.226	-0.213	301	-35.09
EBV:146233-150348+	ebv-miR-BART10-3p	2		0.066	289	-37.91
EBV:146233-150348+	ebv-miR-BART7-3p	1		-0.059	158	-28.5
EBV:146233-150348+	ebv-miR-BART2-3p	1	-0.08	-0.072	158	-18.42
EBV:146233-150348+	ebv-miR-BHRF1-3	1	-0.277	-0.24	154	-22.6
EBV:146233-150348+	ebv-miR-BART20-5p	1			153	-26.32
EBV:146233-150348+	ebv-miR-BART15	1	-0.025	-0.027	153	-19.34
EBV:146233-150348+	ebv-miR-BART21-3p	1	-0.019	-0.09	153	-11.63
EBV:146233-150348+	ebv-miR-BART14-5p	1		0.023	150	-23.7
EBV:146233-150348+	ebv-miR-BART10-5p	1			148	-25.77
EBV:146233-150348+	ebv-miR-BART18-3p	1			145	-23.86
EBV:146233-150348+	ebv-miR-BART9-3p	1			144	-24.77
EBV:146233-150348+	ebv-miR-BART13-5p	1			143	-23.68
EBV:146233-150348+	ebv-miR-BART11-5p	1			142	-26.48
EBV:146233-150348+	ebv-miR-BART6-5p	1			140	-17.72
EBV:149581-150348+	ebv-miR-BART19-5p	1	-0.127	-0.117	150	-12.3
EBV:156527-158751+	ebv-miR-BART4-3p	1	-0.042	-0.07	148	-14.06
EBV:156527-158751+	ebv-miR-BART10-3p	1			143	-18.21
EBV:156527-158751+	ebv-miR-BART5-5p	1		0.034	142	-18.26
EBV:156527-158751+	ebv-miR-BART6-5p	1			141	-23.65
EBV:156527-158751+	ebv-miR-BHRF1-1	1			140	-22.01
EBV:156527-158751+	ebv-miR-BART18-5p	1			140	-19.68
EBV:158625-159918+	ebv-miR-BART17-5p	1	-0.111	-0.146	153	-16.89
EBV:158625-159918+	ebv-miR-BART3-3p	1			143	-34.59
EBV:158625-159918+	ebv-miR-BART4-3p	1		0.045	143	-25.22
EBV:158625-159918+	ebv-miR-BART5-3p	1	-0.39	-0.171	140	-16.32
EBV:360-951+	ebv-miR-BART11-5p	1			147	-22.09
EBV:360-951+	ebv-miR-BART17-5p	1		0.025	143	-20.29
EBV:360-951+	ebv-miR-BART6-5p	1			140	-21.69
EBV:39902-40193-	ebv-miR-BART17-3p	1			146	-21.6
EBV:39902-40193-	ebv-miR-BART13-5p	1		0.03	141	-18.29
