# Supplementary material for: Profiling and functional analysis of exosomal circRNAs from EBV-associated gastric carcinoma CSCs
Source: Research Square preprint supplement (doi:10.21203/rs.3.rs-6704451/v1), 2025-06-12
Supplement: Supplementary file 4 [file 9240f3f9db189ee5621d538e.xlsx]

## Sheet: Sheet1
miRNA binded circRNA summary of binding sites between miRNA and target. Total: the number of binding sites. context+ score & context score: The context+ score & context score from TargetScan. Structure Score & Free Energy: The thermodynamic properties of the binding site from miRanda.
circRNA	miRNA	Total	Context+	Context	Structure	Energy
chr3:71064700-71102924-	hsa-miR-370-3p	3	-0.162	-0.135	452	-82.77
chr5:142779221-142780417-	hsa-miR-370-3p	3	-0.589	-0.56	450	-68.64
chr3:71064700-71102924-	hsa-miR-558	3	-0.386	-0.344	447	-50.18
chr11:33307959-33309057+	hsa-miR-17-3p	3	-0.127	-0.165	443	-54.44
chr3:149563798-149639014+	hsa-miR-5683	3	-0.243	-0.399	442	-38.68
chr5:142779221-142780417-	hsa-miR-6855-5p	3	-0.442	-0.371	442	-64.57
chr11:33307959-33309057+	hsa-miR-7157-5p	3	-0.381	-0.636	439	-48.08
chrX:79962926-79975155-	hsa-miR-141-5p	3	-0.173	-0.292	438	-50.62
chr11:33307959-33309057+	hsa-miR-338-3p	3	-0.67	-0.74	438	-48.44
chr3:71064700-71102924-	hsa-miR-127-5p	3	-0.523	-0.589	434	-61.86
chr11:33307959-33309057+	hsa-miR-103a-3p	3	-0.139	-0.109	430	-53.17
chr11:33307959-33309057+	hsa-miR-107	3	-0.139	-0.109	430	-49.74
chr5:142779221-142780417-	hsa-miR-629-3p	3	-0.044	-0.097	429	-49.23
chr3:71064700-71102924-	hsa-miR-6893-3p	3	-0.263	-0.198	427	-52.63
chr14:99924616-99932150-	hsa-miR-548w	2	-0.082	-0.437	331	-28.31
chr5:142779221-142780417-	hsa-miR-6884-3p	2	-0.611	-0.623	331	-57.38
chr14:99924616-99932150-	hsa-miR-548aq-5p	2	-0.073	-0.422	324	-29.13
chr14:99924616-99932150-	hsa-miR-548y	2	-0.073	-0.422	324	-27.88
chr3:71064700-71102924-	hsa-miR-1226-5p	2	-0.423	-0.287	322	-55.77
chr11:33307959-33309057+	hsa-miR-30d-3p	2	-0.314	-0.659	320	-29.33
chr14:99924616-99932150-	hsa-miR-548am-5p	2	-0.073	-0.422	320	-27.62
chr14:99924616-99932150-	hsa-miR-548ar-5p	2	-0.064	-0.406	320	-22.11
chr14:99924616-99932150-	hsa-miR-548c-5p	2	-0.073	-0.422	320	-27.62
chr14:99924616-99932150-	hsa-miR-548h-5p	2	-0.073	-0.422	320	-26.34
chr14:99924616-99932150-	hsa-miR-548o-5p	2	-0.073	-0.422	320	-27.62
chr3:71064700-71102924-	hsa-miR-4656	2	-0.235	-0.247	318	-62.57
chr14:99924616-99932150-	hsa-miR-548ab	2	-0.055	-0.391	317	-20.48
chr14:99924616-99932150-	hsa-miR-548d-5p	2	-0.055	-0.391	317	-24.78
chr11:33307959-33309057+	hsa-miR-6500-3p	2	-0.289	-0.434	317	-36.95
chr14:99924616-99932150-	hsa-miR-653-3p	2	-0.52	-0.488	317	-32.16
chr3:71064700-71102924-	hsa-miR-17-3p	2	-0.526	-0.511	316	-39.91
chr14:99924616-99932150-	hsa-miR-548bb-5p	2	-0.073	-0.422	316	-23.9
chr14:99924616-99932150-	hsa-miR-548i	2	-0.064	-0.406	316	-26.37
chr3:71064700-71102924-	hsa-miR-93-3p	2	-0.319	-0.364	316	-42.04
chr3:71064700-71102924-	hsa-miR-3150b-3p	2	-0.289	-0.299	315	-42.68
chr3:71064700-71102924-	hsa-miR-4686	2	-0.115	-0.116	315	-42.04
chr14:99924616-99932150-	hsa-miR-548ay-5p	2	-0.045	-0.375	313	-21.7
chr14:99924616-99932150-	hsa-miR-548as-5p	2	-0.045	-0.375	312	-25.02
chr11:33307959-33309057+	hsa-miR-8087	2	-0.273	-0.528	312	-22.72
chr5:142779221-142780417-	hsa-miR-134-3p	2	-0.437	-0.384	311	-41.07
chr14:99924616-99932150-	hsa-miR-4446-3p	2	-0.728	-0.527	310	-45.96
chr3:71064700-71102924-	hsa-miR-4784	2	-0.27	-0.268	310	-42.19
chr3:71064700-71102924-	hsa-miR-6856-5p	2	-0.369	-0.349	310	-53.43
chr5:142779221-142780417-	hsa-miR-4645-3p	2	-0.314	-0.329	308	-45.18
chr3:71064700-71102924-	hsa-miR-6500-3p	2	-0.163	-0.232	308	-33.23
chr5:142779221-142780417-	hsa-miR-1298-5p	2	-0.149	-0.294	307	-34.26
chr14:99924616-99932150-	hsa-miR-548n	2	-0.039	-0.26	307	-24.1
chr11:33307959-33309057+	hsa-miR-30a-3p	2	-0.303	-0.657	306	-26.15
chr11:33307959-33309057+	hsa-miR-6773-3p	2	-0.3	-0.373	306	-39.59
chr11:33307959-33309057+	hsa-miR-7107-3p	2			306	-34.23
chr5:142779221-142780417-	hsa-miR-449a	2	-0.277	-0.241	305	-36.57
chr5:142779221-142780417-	hsa-miR-449b-5p	2	-0.277	-0.241	305	-37.37
chr5:142779221-142780417-	hsa-miR-486-3p	2	-0.636	-0.525	305	-42.78
chr10:7839010-7844817+	hsa-miR-3160-5p	2	-0.063	-0.135	304	-43.25
chr5:142779221-142780417-	hsa-miR-4461	2	-0.13	-0.236	304	-31.26
chr3:71064700-71102924-	hsa-miR-4751	2			304	-52.73
chr5:167915607-167921655+	hsa-miR-4775	2	-0.084	-0.495	304	-25.88
chrX:79962926-79975155-	hsa-miR-7152-5p	2	-0.28	-0.402	304	-34.71
chr3:71064700-71102924-	hsa-miR-3135b	2	-0.676	-0.515	303	-42.74
chr2:32142995-32157204-	hsa-miR-3692-3p	2	-0.119	-0.198	303	-31.4
chrX:79962926-79975155-	hsa-miR-486-5p	2	-0.753	-0.676	303	-45.48
chr3:71064700-71102924-	hsa-miR-765	2	-0.524	-0.433	303	-43.9
chr11:33307959-33309057+	hsa-miR-1271-3p	2	-0.517	-0.4	302	-39.32
chr11:33307959-33309057+	hsa-miR-150-3p	2	-0.17	-0.2	302	-36.36
chr11:33307959-33309057+	hsa-miR-30e-3p	2	-0.282	-0.653	302	-25.03
chrX:79962926-79975155-	hsa-miR-4753-3p	2	-0.013	-0.131	302	-29.13
chr11:33307959-33309057+	hsa-miR-550a-5p	2	-0.477	-0.365	302	-38.59
chr8:48308936-48320523+	hsa-miR-6830-3p	2	-0.184	-0.271	301	-37.7
chr3:71064700-71102924-	hsa-miR-20a-3p	2	-0.099	-0.13	300	-34.73
chr11:33307959-33309057+	hsa-miR-506-3p	2	-0.31	-0.365	300	-35.53
chr14:99924616-99932150-	hsa-miR-5580-5p	2	-0.159	-0.169	300	-40.82
chr3:71064700-71102924-	hsa-miR-7110-5p	2	-0.423	-0.29	300	-58.87
chr5:142779221-142780417-	hsa-miR-6758-3p	2	-0.159	-0.316	299	-35.15
chr5:142779221-142780417-	hsa-miR-942-5p	2	-0.284	-0.485	299	-36.67
chr10:7839010-7844817+	hsa-miR-103a-2-5p	2		-0.055	298	-40.87
chr3:71064700-71102924-	hsa-miR-342-5p	2	-0.273	-0.19	298	-47.18
chr5:142779221-142780417-	hsa-miR-3614-3p	2			298	-43.05
chr3:71064700-71102924-	hsa-miR-367-5p	2	-0.161	-0.172	298	-29.61
chr5:142779221-142780417-	hsa-miR-6839-3p	2	-0.268	-0.388	298	-34.4
chr5:142779221-142780417-	hsa-miR-3170	2	-0.423	-0.354	297	-37.31
chr10:7839010-7844817+	hsa-miR-4659b-3p	2	-0.259	-0.61	297	-34.37
chr2:32142995-32157204-	hsa-miR-4688	2	-0.229	-0.156	297	-49.08
chrX:79962926-79975155-	hsa-miR-578	2			297	-42.4
chr5:142779221-142780417-	hsa-miR-6764-5p	2	-0.231	-0.269	297	-51.65
chr3:71064700-71102924-	hsa-miR-3692-5p	2	-0.336	-0.309	296	-42.01
chr5:167915607-167921655+	hsa-miR-4766-3p	2		-0.11	296	-32.49
chr3:71064700-71102924-	hsa-miR-485-5p	2		0.05	296	-36.01
chr11:33307959-33309057+	hsa-miR-548at-5p	2	-0.036	-0.197	296	-23.04
chr5:167915607-167921655+	hsa-miR-3145-3p	2		-0.066	295	-21.14
chr5:142779221-142780417-	hsa-miR-3192-3p	2	-0.355	-0.465	295	-28.77
chr3:149563798-149639014+	hsa-miR-4452	2	-0.132	-0.249	295	-22.92
chr5:142779221-142780417-	hsa-miR-548g-3p	2	-0.188	-0.382	295	-21.33
chr11:33307959-33309057+	hsa-miR-550a-3-5p	2	-0.467	-0.363	295	-35.37
chr5:142779221-142780417-	hsa-miR-5586-3p	2	-0.293	-0.366	295	-32.06
chr11:33307959-33309057+	hsa-miR-653-5p	2	-0.325	-0.495	295	-19.14
chr3:71064700-71102924-	hsa-miR-6752-5p	2	-0.444	-0.294	295	-59.49
chr3:71064700-71102924-	hsa-miR-6803-5p	2	-0.21	-0.15	295	-54.26
chr3:157839892-157841780+	hsa-miR-3156-5p	2	-0.16	-0.244	294	-25.89
chr11:33307959-33309057+	hsa-miR-5586-5p	2		-0.055	294	-38.07
chr3:149563798-149639014+	hsa-miR-654-3p	2	-0.404	-0.504	294	-26.8
chr3:71064700-71102924-	hsa-miR-6751-5p	2	-0.182	-0.104	294	-47.83
chr11:33307959-33309057+	hsa-miR-3136-5p	2	-0.358	-0.349	293	-33.47
chr5:142779221-142780417-	hsa-miR-328-3p	2	-0.553	-0.355	293	-37.81
chr3:71064700-71102924-	hsa-miR-3912-5p	2	-0.301	-0.336	293	-29.23
chr10:7839010-7844817+	hsa-miR-4799-3p	2	-0.219	-0.24	293	-33.34
chr14:99924616-99932150-	hsa-miR-548ai	2			293	-24.98
chr14:99924616-99932150-	hsa-miR-570-5p	2			293	-24.98
chr10:7839010-7844817+	hsa-miR-4659a-3p	2	-0.248	-0.608	292	-31.96
chr14:99924616-99932150-	hsa-miR-548ao-5p	2		-0.074	292	-29.04
chr10:7839010-7844817+	hsa-miR-1249-5p	2			291	-49.73
chr11:33307959-33309057+	hsa-miR-4325	2		-0.081	291	-37.47
chr3:71064700-71102924-	hsa-miR-4459	2	-0.136	-0.131	291	-42.71
chr10:7839010-7844817+	hsa-miR-4766-3p	2	-0.146	-0.27	291	-19.43
chr5:167915607-167921655+	hsa-miR-1305	2	-0.237	-0.538	290	-20.32
chr5:142779221-142780417-	hsa-miR-18b-5p	2	-0.198	-0.211	290	-35.06
chr5:167915607-167921655+	hsa-miR-2052	2	-0.035	-0.139	290	-19.21
chr5:142779221-142780417-	hsa-miR-3166	2	-0.306	-0.288	290	-26.7
chr3:71064700-71102924-	hsa-miR-4322	2			290	-48.74
chr8:48308936-48320523+	hsa-miR-4680-3p	2	-0.209	-0.42	290	-24.84
chr3:71064700-71102924-	hsa-miR-4739	2			290	-54.72
chr3:71064700-71102924-	hsa-miR-6874-5p	2	-0.125	-0.071	290	-38.62
chr11:33307959-33309057+	hsa-miR-16-1-3p	2			289	-36.22
chr10:7839010-7844817+	hsa-miR-19b-2-5p	2		-0.076	289	-25.49
chr5:142779221-142780417-	hsa-miR-3174	2	-0.15	-0.168	289	-39.91
chr3:149563798-149639014+	hsa-miR-34b-5p	2	-0.258	-0.26	289	-30.2
chr5:142779221-142780417-	hsa-miR-4659b-3p	2	-0.143	-0.283	289	-35.55
chr5:167915607-167921655+	hsa-miR-501-5p	2	-0.159	-0.288	289	-31.36
chr11:33307959-33309057+	hsa-miR-580-5p	2		-0.03	289	-23.51
chr3:71064700-71102924-	hsa-miR-6851-5p	2	-0.14	-0.105	289	-37.01
chr5:142779221-142780417-	hsa-miR-193b-5p	2	-0.339	-0.334	288	-31.81
chr10:7839010-7844817+	hsa-miR-335-3p	2	-0.111	-0.546	288	-15.8
chr5:142779221-142780417-	hsa-miR-3915	2		0.016	288	-30.38
chr5:142779221-142780417-	hsa-miR-4434	2		-0.029	288	-31.58
chr3:71064700-71102924-	hsa-miR-4677-5p	2			288	-30.66
chr11:33307959-33309057+	hsa-miR-4682	2	-0.196	-0.248	288	-35.68
chr14:99924616-99932150-	hsa-miR-4778-3p	2	-0.303	-0.43	288	-32.99
chr5:142779221-142780417-	hsa-miR-519d-5p	2	-0.06	-0.148	288	-37.66
chr5:142779221-142780417-	hsa-miR-548e-3p	2	-0.114	-0.275	288	-20.38
chr11:33307959-33309057+	hsa-miR-605-3p	2		-0.054	288	-32.93
chr10:7839010-7844817+	hsa-miR-6787-3p	2	-0.253	-0.229	288	-38.73
chr8:48308936-48320523+	hsa-miR-6873-3p	2	-0.167	-0.265	288	-30.54
chr3:71064700-71102924-	hsa-miR-7974	2		-0.041	288	-40.09
chr11:33307959-33309057+	hsa-miR-1248	2		0.021	287	-31.68
chr10:7839010-7844817+	hsa-miR-153-5p	2			287	-30.87
chr11:33307959-33309057+	hsa-miR-2052	2	-0.053	-0.325	287	-18.72
chr11:33307959-33309057+	hsa-miR-3617-3p	2	-0.408	-0.454	287	-22.66
chr3:71064700-71102924-	hsa-miR-6858-5p	2		-0.005	287	-50.15
chr10:7839010-7844817+	hsa-miR-8082	2	-0.282	-0.364	287	-29.65
chr5:142779221-142780417-	hsa-miR-1267	2	-0.125	-0.163	286	-23.82
chr5:142779221-142780417-	hsa-miR-26b-3p	2	-0.101	-0.182	286	-30.2
chr5:142779221-142780417-	hsa-miR-3692-5p	2	-0.152	-0.156	286	-42.39
chr2:32142995-32157204-	hsa-miR-4421	2	-0.392	-0.432	286	-30.84
chr5:142779221-142780417-	hsa-miR-4520-3p	2	-0.331	-0.339	286	-34.05
chr14:99924616-99932150-	hsa-miR-559	2	-0.017	-0.329	286	-13.61
chr5:142779221-142780417-	hsa-miR-6803-5p	2		0.008	286	-48.93
chr5:142779221-142780417-	hsa-miR-759	2	-0.251	-0.383	286	-29.12
chr14:99924616-99932150-	hsa-miR-1825	2	-0.355	-0.24	285	-31.4
chr8:48308936-48320523+	hsa-miR-32-3p	2		-0.02	285	-18.94
chr10:7839010-7844817+	hsa-miR-376b-3p	2	-0.409	-0.563	285	-20.9
chr3:71064700-71102924-	hsa-miR-4265	2			285	-45.24
chr5:142779221-142780417-	hsa-miR-452-5p	2		-0.057	285	-36.38
chr11:33307959-33309057+	hsa-miR-488-3p	2			285	-31.61
chr5:142779221-142780417-	hsa-miR-6752-5p	2		-0.012	285	-45.71
chr14:99924616-99932150-	hsa-miR-877-3p	2	-0.161	-0.207	285	-32.36
chr5:167915607-167921655+	hsa-miR-4314	2	-0.174	-0.157	284	-27.55
chr3:149563798-149639014+	hsa-miR-4662b	2	-0.158	-0.258	284	-30.53
chr14:99924616-99932150-	hsa-miR-548ba	2			284	-22.91
chr5:142779221-142780417-	hsa-miR-5582-3p	2		0.009	284	-27.1
chr3:149563798-149639014+	hsa-miR-580-5p	2		-0.028	284	-29.27
chr5:142779221-142780417-	hsa-miR-612	2			284	-49.81
chr3:71064700-71102924-	hsa-miR-6735-3p	2		-0.028	284	-37.6
chr5:142779221-142780417-	hsa-miR-6753-3p	2	-0.259	-0.295	284	-37.24
chr3:71064700-71102924-	hsa-miR-3158-5p	2		0.008	283	-32.24
chr10:7839010-7844817+	hsa-miR-376a-3p	2	-0.409	-0.563	283	-16.74
chr3:71064700-71102924-	hsa-miR-4731-5p	2	-0.49	-0.41	283	-54.16
chr5:142779221-142780417-	hsa-miR-4784	2	-0.114	-0.129	283	-35.6
chr10:7839010-7844817+	hsa-miR-10b-3p	2		-0.017	282	-31.74
chr11:33307959-33309057+	hsa-miR-4310	2	-0.342	-0.566	282	-18.96
chr11:33307959-33309057+	hsa-miR-4999-3p	2	-0.194	-0.179	282	-26.72
chr3:71064700-71102924-	hsa-miR-4999-5p	2			282	-40.62
chr5:142779221-142780417-	hsa-miR-5007-5p	2		-0.018	282	-36.1
chr11:33307959-33309057+	hsa-miR-524-5p	2	-0.038	-0.209	282	-25.68
chr14:99924616-99932150-	hsa-miR-616-3p	2		-0.046	282	-41.95
chr11:33307959-33309057+	hsa-miR-891a-3p	2			282	-32.93
chr3:71064700-71102924-	hsa-miR-3162-5p	2			281	-45.46
chr3:149563798-149639014+	hsa-miR-4638-3p	2	-0.444	-0.414	281	-33.46
chr2:32142995-32157204-	hsa-miR-6888-3p	2	-0.11	-0.161	281	-29.45
chr3:149563798-149639014+	hsa-miR-1245b-3p	2	-0.123	-0.204	280	-27.15
chr3:71064700-71102924-	hsa-miR-377-5p	2	-0.116	-0.122	280	-39.84
chr11:33307959-33309057+	hsa-miR-4652-3p	2	-0.037	-0.161	280	-31.27
chr5:142779221-142780417-	hsa-miR-4731-5p	2	-0.452	-0.411	280	-43.85
chr5:142779221-142780417-	hsa-miR-5002-5p	2		0.041	280	-28.18
chr5:142779221-142780417-	hsa-miR-6893-3p	2	-0.509	-0.488	280	-34.98
chr3:71064700-71102924-	hsa-miR-6894-5p	2	-0.274	-0.25	280	-39.8
chr8:48308936-48320523+	hsa-miR-3198	1	-0.263	-0.287	177	-35.34
chr5:142779221-142780417-	hsa-miR-4653-3p	1	-0.222	-0.256	177	-25.42
chr5:142779221-142780417-	hsa-miR-3681-5p	1	-0.094	-0.114	174	-24.16
chr5:142779221-142780417-	hsa-miR-4268	1	-0.252	-0.223	174	-28.85
chr8:48308936-48320523+	hsa-miR-4778-3p	1	-0.193	-0.303	174	-18.89
chr10:7839010-7844817+	hsa-miR-519d-5p	1	-0.207	-0.281	173	-22.34
chrX:79962926-79975155-	hsa-miR-135a-5p	1	-0.234	-0.296	171	-13.89
chr5:167915607-167921655+	hsa-miR-181d-5p	1	-0.268	-0.437	171	-21.76
chr3:71064700-71102924-	hsa-miR-20b-3p	1			170	-28.41
chr11:33307959-33309057+	hsa-miR-3945	1	-0.246	-0.264	170	-25.37
chr5:142779221-142780417-	hsa-miR-4667-5p	1	-0.175	-0.203	170	-27.38
chr18:56363598-56367823+	hsa-miR-6506-5p	1	-0.302	-0.284	170	-23.99
chr2:32142995-32157204-	hsa-miR-3978	1	-0.144	-0.243	169	-19.64
chr5:142779221-142780417-	hsa-miR-4669	1	-0.249	-0.241	169	-30.95
chr3:71064700-71102924-	hsa-miR-5088-5p	1	-0.241	-0.18	169	-32.21
chr5:167915607-167921655+	hsa-miR-582-5p	1		-0.035	169	-22.56
chr3:71064700-71102924-	hsa-miR-6086	1	-0.218	-0.292	169	-33.32
chr11:33307959-33309057+	hsa-miR-637	1	-0.175	-0.129	169	-32.89
chrX:79962926-79975155-	hsa-miR-6833-3p	1	-0.159	-0.255	169	-21.23
chr11:33307959-33309057+	hsa-miR-193b-3p	1	-0.337	-0.313	168	-25.62
chr3:157839892-157841780+	hsa-miR-5197-3p	1	-0.125	-0.194	168	-21.98
chr14:99924616-99932150-	hsa-miR-6829-5p	1	-0.324	-0.301	168	-30.23
chr5:167915607-167921655+	hsa-miR-181b-5p	1	-0.257	-0.435	167	-21.58
chr5:142779221-142780417-	hsa-miR-362-5p	1	-0.14	-0.184	167	-21.48
chr14:99924616-99932150-	hsa-miR-4653-3p	1	-0.101	-0.125	167	-26.55
chr3:157839892-157841780+	hsa-miR-516b-5p	1	-0.372	-0.286	167	-20.47
chr10:7839010-7844817+	hsa-miR-519e-5p	1	-0.097	-0.158	167	-21.93
chr2:32142995-32157204-	hsa-miR-6814-5p	1	-0.244	-0.244	167	-27
chr3:149563798-149639014+	hsa-miR-3660	1	-0.19	-0.226	166	-24.04
chr5:167915607-167921655+	hsa-miR-3689b-3p	1	-0.255	-0.253	166	-27.65
chr5:167915607-167921655+	hsa-miR-3689c	1	-0.255	-0.253	166	-27.65
chr3:71064700-71102924-	hsa-miR-4772-3p	1	-0.243	-0.305	166	-19.99
chr5:167915607-167921655+	hsa-miR-4782-5p	1	-0.188	-0.235	166	-17.85
chr2:32142995-32157204-	hsa-miR-6758-5p	1	-0.139	-0.151	166	-25.84
chr5:142779221-142780417-	hsa-miR-23c	1	-0.05	-0.198	165	-22.25
chr5:142779221-142780417-	hsa-miR-3145-5p	1	-0.179	-0.26	165	-17.41
chr10:7839010-7844817+	hsa-miR-3591-5p	1	-0.089	-0.156	165	-18.14
chr3:71064700-71102924-	hsa-miR-4429	1	-0.129	-0.236	165	-26.94
chr2:32142995-32157204-	hsa-miR-6856-5p	1	-0.13	-0.136	165	-24.47
chr14:99924616-99932150-	hsa-miR-6883-5p	1	-0.295	-0.289	165	-24.18
chr5:142779221-142780417-	hsa-miR-7850-5p	1	-0.136	-0.206	165	-23.12
chr11:33307959-33309057+	hsa-miR-193a-3p	1	-0.319	-0.282	164	-22.85
chr5:142779221-142780417-	hsa-miR-3691-5p	1	-0.101	-0.095	164	-20.84
chr3:149563798-149639014+	hsa-miR-4474-3p	1	-0.238	-0.242	164	-24.52
chr8:48308936-48320523+	hsa-miR-4646-5p	1	-0.221	-0.277	164	-30.27
chr2:32142995-32157204-	hsa-miR-485-3p	1	-0.106	-0.17	164	-16.87
chr3:149563798-149639014+	hsa-miR-7-5p	1	-0.29	-0.355	164	-19.01
chr2:32142995-32157204-	hsa-miR-7152-5p	1	-0.149	-0.209	164	-21.98
chr5:142779221-142780417-	hsa-let-7f-1-3p	1	-0.037	-0.229	163	-16.67
chr3:71064700-71102924-	hsa-miR-103a-2-5p	1		-0.02	163	-22.14
chrX:79962926-79975155-	hsa-miR-135b-5p	1	-0.234	-0.296	163	-13.3
chr5:142779221-142780417-	hsa-miR-3064-5p	1	-0.325	-0.267	163	-28.68
chr5:167915607-167921655+	hsa-miR-3192-5p	1	-0.368	-0.359	163	-25.16
chr3:71064700-71102924-	hsa-miR-320a	1	-0.12	-0.22	163	-24.85
chr3:71064700-71102924-	hsa-miR-320b	1	-0.12	-0.22	163	-24.91
chrX:79962926-79975155-	hsa-miR-4511	1	-0.059	-0.132	163	-19.2
chr11:33307959-33309057+	hsa-miR-4661-3p	1	-0.24	-0.198	163	-23.55
chr5:167915607-167921655+	hsa-miR-4762-5p	1	-0.042	-0.139	163	-21.5
chrX:79962926-79975155-	hsa-miR-4768-5p	1	-0.122	-0.193	163	-23.75
chr10:7839010-7844817+	hsa-miR-548l	1	-0.07	-0.256	163	-15.3
chr14:99924616-99932150-	hsa-miR-6818-3p	1			163	-20.63
chr5:167915607-167921655+	hsa-miR-8055	1	-0.299	-0.378	163	-16.22
chr14:99924616-99932150-	hsa-miR-1184	1	-0.381	-0.338	162	-22.21
chr3:71064700-71102924-	hsa-miR-1302	1	-0.239	-0.217	162	-18.05
chrX:79962926-79975155-	hsa-miR-3120-5p	1	-0.215	-0.252	162	-23.35
chr3:149563798-149639014+	hsa-miR-3133	1			162	-19.14
chr14:99924616-99932150-	hsa-miR-421	1	-0.299	-0.398	162	-13.25
chr5:167915607-167921655+	hsa-miR-4677-5p	1			162	-20.5
chr2:32142995-32157204-	hsa-miR-4693-5p	1	-0.25	-0.309	162	-22.6
chr5:167915607-167921655+	hsa-miR-5087	1	-0.356	-0.422	162	-19.62
chr14:99924616-99932150-	hsa-miR-548ak	1	-0.061	-0.244	162	-8.7
chr14:99924616-99932150-	hsa-miR-548au-5p	1	-0.061	-0.244	162	-9.77
chr2:32142995-32157204-	hsa-miR-5700	1	-0.17	-0.274	162	-12.87
chrX:79962926-79975155-	hsa-miR-6739-3p	1	-0.092	-0.188	162	-21.8
chr5:142779221-142780417-	hsa-miR-6753-5p	1	-0.308	-0.271	162	-24.67
chr14:99924616-99932150-	hsa-miR-6785-5p	1	-0.286	-0.274	162	-23.85
chrX:79962926-79975155-	hsa-miR-6873-3p	1	-0.259	-0.272	162	-22.89
chrX:79962926-79975155-	hsa-miR-6876-3p	1		-0.047	162	-27.82
chrX:79962926-79975155-	hsa-miR-1184	1	-0.45	-0.369	161	-25.54
chr8:48308936-48320523+	hsa-miR-1250-3p	1	-0.07	-0.24	161	-16.79
chr5:142779221-142780417-	hsa-miR-136-5p	1	-0.28	-0.376	161	-19.41
chr5:167915607-167921655+	hsa-miR-2053	1	-0.078	-0.21	161	-8.04
chr5:142779221-142780417-	hsa-miR-23a-3p	1	-0.05	-0.198	161	-19.54
chr5:142779221-142780417-	hsa-miR-23b-3p	1	-0.05	-0.198	161	-19.54
chrX:79962926-79975155-	hsa-miR-3187-3p	1	-0.146	-0.142	161	-27.49
chr3:71064700-71102924-	hsa-miR-320c	1	-0.12	-0.22	161	-22.57
chr10:7839010-7844817+	hsa-miR-337-3p	1	-0.201	-0.317	161	-18.72
chr14:99924616-99932150-	hsa-miR-342-3p	1	-0.138	-0.16	161	-18.94
chr3:71064700-71102924-	hsa-miR-3607-3p	1	-0.141	-0.286	161	-15.19
chr3:149563798-149639014+	hsa-miR-4424	1	-0.319	-0.424	161	-13.36
chr5:167915607-167921655+	hsa-miR-4668-3p	1	-0.156	-0.308	161	-11.9
chr5:167915607-167921655+	hsa-miR-4703-3p	1	-0.194	-0.228	161	-15.45
chr14:99924616-99932150-	hsa-miR-4741	1		-0.041	161	-29.96
chr10:7839010-7844817+	hsa-miR-4760-3p	1	-0.069	-0.246	161	-13.16
chr11:33307959-33309057+	hsa-miR-4760-3p	1	-0.009	-0.198	161	-12.26
chr5:167915607-167921655+	hsa-miR-4762-3p	1	-0.179	-0.306	161	-13.67
chr11:33307959-33309057+	hsa-miR-5087	1	-0.091	-0.132	161	-23.35
chr3:149563798-149639014+	hsa-miR-511-5p	1	-0.193	-0.369	161	-15.26
chr10:7839010-7844817+	hsa-miR-515-5p	1	-0.106	-0.174	161	-20.79
chr3:71064700-71102924-	hsa-miR-544a	1	-0.138	-0.206	161	-12.32
chr2:32142995-32157204-	hsa-miR-5699-3p	1	-0.403	-0.393	161	-20
chr5:142779221-142780417-	hsa-miR-711	1	-0.176	-0.127	161	-28.71
chrX:79962926-79975155-	hsa-miR-1282	1	-0.218	-0.181	160	-18.92
chr11:33307959-33309057+	hsa-miR-134-5p	1		-0.033	160	-29.39
chr3:71064700-71102924-	hsa-miR-2467-3p	1	-0.369	-0.304	160	-24.04
chr5:142779221-142780417-	hsa-miR-3678-3p	1	-0.145	-0.161	160	-17.19
chr11:33307959-33309057+	hsa-miR-3683	1			160	-20.69
chr14:99924616-99932150-	hsa-miR-374b-3p	1	-0.32	-0.438	160	-15.73
chrX:79962926-79975155-	hsa-miR-3912-5p	1	-0.204	-0.249	160	-17.44
chrX:79962926-79975155-	hsa-miR-4271	1	-0.42	-0.429	160	-20.04
chr3:157839892-157841780+	hsa-miR-4446-5p	1	-0.12	-0.192	160	-24.18
chr10:7839010-7844817+	hsa-miR-4472	1	-0.211	-0.157	160	-22.15
chr3:149563798-149639014+	hsa-miR-4476	1	-0.233	-0.294	160	-18.58
chr11:33307959-33309057+	hsa-miR-4727-3p	1	-0.41	-0.335	160	-16.34
chr2:32142995-32157204-	hsa-miR-519c-3p	1	-0.14	-0.173	160	-18.37
chr5:142779221-142780417-	hsa-miR-525-5p	1	-0.145	-0.166	160	-24.25
chr3:71064700-71102924-	hsa-miR-532-5p	1	-0.111	-0.137	160	-25.59
chr11:33307959-33309057+	hsa-miR-550b-2-5p	1	-0.117	-0.082	160	-22.8
chr5:142779221-142780417-	hsa-miR-5581-5p	1		-0.047	160	-24.34
chr18:56363598-56367823+	hsa-miR-5586-5p	1	-0.232	-0.21	160	-21.07
chr5:142779221-142780417-	hsa-miR-6504-5p	1	-0.314	-0.265	160	-25.18
chr3:149563798-149639014+	hsa-miR-7107-3p	1		-0.07	160	-20.35
chr3:71064700-71102924-	hsa-miR-8089	1	-0.235	-0.214	160	-24.68
chr14:99924616-99932150-	hsa-miR-1250-3p	1	-0.029	-0.224	159	-16.83
chr3:71064700-71102924-	hsa-miR-1267	1	-0.137	-0.179	159	-15.41
chr5:142779221-142780417-	hsa-miR-130a-5p	1	-0.071	-0.202	159	-22.04
chr2:32142995-32157204-	hsa-miR-20b-5p	1	-0.092	-0.153	159	-14.82
chr10:7839010-7844817+	hsa-miR-223-3p	1			159	-20.17
chr2:61749746-61753656-	hsa-miR-23a-3p	1	-0.199	-0.32	159	-15.42
chr8:48308936-48320523+	hsa-miR-3192-5p	1		-0.04	159	-28.29
chr10:7839010-7844817+	hsa-miR-362-3p	1	-0.228	-0.263	159	-15.7
chr5:142779221-142780417-	hsa-miR-412-5p	1	-0.533	-0.273	159	-23.11
chr2:32142995-32157204-	hsa-miR-423-5p	1	-0.294	-0.227	159	-22.44
chr3:149563798-149639014+	hsa-miR-4312	1	-0.349	-0.32	159	-21.12
chr3:71064700-71102924-	hsa-miR-4477a	1	-0.028	-0.261	159	-12.04
chr5:142779221-142780417-	hsa-miR-450b-5p	1	-0.061	-0.191	159	-9.38
chr3:149563798-149639014+	hsa-miR-4526	1	-0.125	-0.117	159	-29.3
chrX:79962926-79975155-	hsa-miR-4529-3p	1	-0.331	-0.345	159	-18.74
chr11:33307959-33309057+	hsa-miR-4646-3p	1	-0.391	-0.395	159	-23.12
chr5:142779221-142780417-	hsa-miR-4666a-3p	1	-0.035	-0.268	159	-9.52
chr8:48308936-48320523+	hsa-miR-4677-5p	1			159	-22.7
chr5:142779221-142780417-	hsa-miR-4743-3p	1	-0.236	-0.338	159	-18.8
chr3:149563798-149639014+	hsa-miR-4759	1			159	-21.99
chr11:33307959-33309057+	hsa-miR-499a-5p	1	-0.086	-0.175	159	-12.75
chr5:142779221-142780417-	hsa-miR-500b-5p	1	-0.122	-0.153	159	-18.85
chr11:33307959-33309057+	hsa-miR-5688	1	-0.088	-0.22	159	-9.34
chr3:71064700-71102924-	hsa-miR-5689	1	-0.307	-0.255	159	-24.62
chr14:99924616-99932150-	hsa-miR-5699-5p	1	-0.227	-0.199	159	-21.2
chr3:149563798-149639014+	hsa-miR-632	1	-0.29	-0.296	159	-24.86
chr11:33307959-33309057+	hsa-miR-6788-3p	1	-0.436	-0.196	159	-27.2
chr3:71064700-71102924-	hsa-miR-6793-5p	1	-0.38	-0.327	159	-25.22
chr8:48308936-48320523+	hsa-miR-6793-5p	1	-0.377	-0.337	159	-26.88
chr3:71064700-71102924-	hsa-miR-6811-3p	1	-0.384	-0.33	159	-21.71
chr11:33307959-33309057+	hsa-miR-6844	1	-0.086	-0.189	159	-13.68
chrX:79962926-79975155-	hsa-miR-6875-3p	1	-0.119	-0.225	159	-24.13
chr3:157839892-157841780+	hsa-miR-7161-3p	1	-0.111	-0.169	159	-18.32
chr14:99924616-99932150-	hsa-miR-9-5p	1	-0.113	-0.166	159	-17.08
chr5:142779221-142780417-	hsa-miR-96-5p	1	-0.173	-0.165	159	-18.42
chr14:99924616-99932150-	hsa-miR-1236-3p	1	-0.126	-0.145	158	-19.95
chr14:99924616-99932150-	hsa-miR-1273d	1	-0.177	-0.199	158	-22.72
chr3:149563798-149639014+	hsa-miR-1299	1	-0.306	-0.382	158	-22.44
chr5:142779221-142780417-	hsa-miR-1299	1	-0.051	-0.1	158	-19.53
chrX:79962926-79975155-	hsa-miR-1301-3p	1	-0.185	-0.161	158	-24.88
chrX:79962926-79975155-	hsa-miR-1305	1	-0.136	-0.399	158	-12.71
chr11:33307959-33309057+	hsa-miR-190a-5p	1	-0.184	-0.24	158	-13.19
chr5:142779221-142780417-	hsa-miR-2276-3p	1		-0.037	158	-27.23
chr5:167915607-167921655+	hsa-miR-30b-3p	1	-0.255	-0.253	158	-23.87
chr3:149563798-149639014+	hsa-miR-3147	1			158	-33.14
chr11:33307959-33309057+	hsa-miR-33b-5p	1	-0.088	-0.159	158	-19.34
chr5:167915607-167921655+	hsa-miR-3689a-3p	1	-0.255	-0.253	158	-27.65
chr11:33307959-33309057+	hsa-miR-376b-5p	1	-0.164	-0.174	158	-17.44
chr11:33307959-33309057+	hsa-miR-376c-5p	1	-0.164	-0.174	158	-13.03
chr10:7839010-7844817+	hsa-miR-3908	1	-0.246	-0.314	158	-13.78
chr11:33307959-33309057+	hsa-miR-3925-3p	1	-0.261	-0.249	158	-17.87
chr14:99924616-99932150-	hsa-miR-4272	1	-0.104	-0.235	158	-12.23
chr8:48308936-48320523+	hsa-miR-4450	1	-0.215	-0.193	158	-21.81
chr5:142779221-142780417-	hsa-miR-4680-5p	1	-0.17	-0.211	158	-15.68
chr8:48308936-48320523+	hsa-miR-4682	1			158	-28.76
chr10:7839010-7844817+	hsa-miR-4756-3p	1	-0.171	-0.223	158	-19.9
chr11:33307959-33309057+	hsa-miR-4803	1	-0.049	-0.192	158	-16.42
chr5:167915607-167921655+	hsa-miR-519d-5p	1	-0.211	-0.305	158	-19.85
chr3:71064700-71102924-	hsa-miR-525-5p	1	-0.297	-0.275	158	-18.43
chr5:167915607-167921655+	hsa-miR-539-5p	1	-0.133	-0.327	158	-15.46
chr14:99924616-99932150-	hsa-miR-548ad-5p	1	-0.034	-0.198	158	-9.77
chr14:99924616-99932150-	hsa-miR-548ae-5p	1	-0.034	-0.198	158	-9.77
chr3:71064700-71102924-	hsa-miR-548av-3p	1	-0.082	-0.13	158	-9.9
chr14:99924616-99932150-	hsa-miR-548b-5p	1	-0.034	-0.198	158	-12.21
chr3:71064700-71102924-	hsa-miR-574-5p	1	-0.142	-0.128	158	-19.84
chr3:149563798-149639014+	hsa-miR-643	1	-0.054	-0.149	158	-17.94
chr3:149563798-149639014+	hsa-miR-6509-5p	1	-0.139	-0.195	158	-22.25
chrX:79962926-79975155-	hsa-miR-6512-5p	1	-0.137	-0.216	158	-17.79
chrX:79962926-79975155-	hsa-miR-6740-5p	1	-0.345	-0.332	158	-17.24
chrX:79962926-79975155-	hsa-miR-6777-3p	1	-0.175	-0.175	158	-19.84
chr5:142779221-142780417-	hsa-miR-6852-5p	1	-0.23	-0.236	158	-23.33
chr3:149563798-149639014+	hsa-miR-6876-5p	1	-0.214	-0.263	158	-18.08
chr14:99924616-99932150-	hsa-miR-942-5p	1	-0.298	-0.456	158	-16.63
chr10:7839010-7844817+	hsa-miR-10a-3p	1		-0.054	157	-23.73
chrX:79962926-79975155-	hsa-miR-190b	1	-0.106	-0.161	157	-14.43
chr5:142779221-142780417-	hsa-miR-27b-3p	1	-0.254	-0.3	157	-22.9
chr3:149563798-149639014+	hsa-miR-3115	1	-0.171	-0.163	157	-17.61
chr14:99924616-99932150-	hsa-miR-3120-3p	1	-0.114	-0.166	157	-24.48
chr5:142779221-142780417-	hsa-miR-3144-5p	1	-0.391	-0.233	157	-19.54
chr3:71064700-71102924-	hsa-miR-3150a-3p	1	-0.255	-0.238	157	-25.99
chr5:167915607-167921655+	hsa-miR-3200-5p	1	-0.174	-0.226	157	-16.5
chr10:7839010-7844817+	hsa-miR-3200-5p	1	-0.079	-0.108	157	-19.93
chr11:33307959-33309057+	hsa-miR-33a-5p	1	-0.088	-0.159	157	-17.32
chr5:142779221-142780417-	hsa-miR-34a-5p	1	-0.243	-0.247	157	-20.53
chr10:7839010-7844817+	hsa-miR-3663-3p	1		-0.054	157	-30.73
chr3:71064700-71102924-	hsa-miR-4254	1	-0.146	-0.108	157	-21.67
chr5:142779221-142780417-	hsa-miR-432-5p	1	-0.195	-0.23	157	-20.29
chr5:167915607-167921655+	hsa-miR-4531	1	-0.309	-0.34	157	-19.86
chr10:7839010-7844817+	hsa-miR-4680-3p	1	-0.12	-0.26	157	-12.67
chr3:149563798-149639014+	hsa-miR-4692	1	-0.284	-0.302	157	-19.94
chr5:142779221-142780417-	hsa-miR-4693-3p	1	-0.385	-0.385	157	-19.03
chr5:142779221-142780417-	hsa-miR-4712-3p	1	-0.103	-0.156	157	-13.1
chr5:142779221-142780417-	hsa-miR-4999-5p	1	-0.329	-0.357	157	-21.31
chrX:79962926-79975155-	hsa-miR-5009-5p	1	-0.34	-0.318	157	-18.08
chr11:33307959-33309057+	hsa-miR-508-3p	1	-0.13	-0.174	157	-14.28
chr3:149563798-149639014+	hsa-miR-513b-3p	1	-0.136	-0.235	157	-11.68
chr11:33307959-33309057+	hsa-miR-558	1	-0.382	-0.31	157	-23.06
chr5:167915607-167921655+	hsa-miR-5591-3p	1	-0.215	-0.23	157	-18.53
chr3:71064700-71102924-	hsa-miR-619-3p	1	-0.136	-0.085	157	-21.88
chr5:167915607-167921655+	hsa-miR-628-5p	1	-0.206	-0.228	157	-18.24
chr5:167915607-167921655+	hsa-miR-634	1	-0.338	-0.367	157	-17.98
chr5:167915607-167921655+	hsa-miR-6738-3p	1	-0.369	-0.386	157	-18.67
chr2:32142995-32157204-	hsa-miR-6770-5p	1	-0.255	-0.268	157	-19.25
chr3:71064700-71102924-	hsa-miR-6780b-5p	1	-0.126	-0.125	157	-25.12
chr3:149563798-149639014+	hsa-miR-6891-5p	1			157	-26.94
chr11:33307959-33309057+	hsa-miR-7106-5p	1	-0.403	-0.387	157	-22.94
chr2:32142995-32157204-	hsa-miR-105-5p	1	-0.181	-0.275	156	-17.15
chr11:33307959-33309057+	hsa-miR-10a-5p	1	-0.302	-0.309	156	-23.67
chr5:142779221-142780417-	hsa-miR-1236-5p	1			156	-22.57
chr5:167915607-167921655+	hsa-miR-1290	1	-0.034	-0.141	156	-13.29
chr3:157839892-157841780+	hsa-miR-151a-5p	1	-0.488	-0.276	156	-23.03
chr11:33307959-33309057+	hsa-miR-186-3p	1	-0.148	-0.192	156	-16.78
chr14:99924616-99932150-	hsa-miR-20a-3p	1	-0.116	-0.177	156	-17.7
chrX:79962926-79975155-	hsa-miR-2117	1	-0.27	-0.304	156	-19.15
chr18:56363598-56367823+	hsa-miR-217	1	-0.232	-0.28	156	-12.93
chr5:142779221-142780417-	hsa-miR-27a-3p	1	-0.254	-0.3	156	-24.95
chr11:33307959-33309057+	hsa-miR-302b-5p	1	-0.067	-0.205	156	-15.98
chr3:71064700-71102924-	hsa-miR-320d	1	-0.111	-0.205	156	-22.7
chr3:157839892-157841780+	hsa-miR-3929	1	-0.196	-0.209	156	-21.9
chr10:7839010-7844817+	hsa-miR-4453	1	-0.178	-0.154	156	-22.12
chr8:48308936-48320523+	hsa-miR-4471	1			156	-20.53
chr5:142779221-142780417-	hsa-miR-4526	1	-0.194	-0.236	156	-23.08
chr14:99924616-99932150-	hsa-miR-4640-5p	1	-0.368	-0.184	156	-31.24
chr3:149563798-149639014+	hsa-miR-4756-5p	1	-0.244	-0.231	156	-25.25
chr3:157839892-157841780+	hsa-miR-4776-5p	1	-0.262	-0.215	156	-21.7
chrX:79962926-79975155-	hsa-miR-4790-5p	1			156	-17.25
chr5:142779221-142780417-	hsa-miR-5000-5p	1	-0.125	-0.154	156	-21.55
chr3:71064700-71102924-	hsa-miR-5100	1	-0.08	-0.101	156	-18.19
chr11:33307959-33309057+	hsa-miR-548an	1	-0.138	-0.184	156	-16.67
chrX:79962926-79975155-	hsa-miR-548u	1	-0.213	-0.371	156	-10.95
chr14:99924616-99932150-	hsa-miR-5682	1	-0.244	-0.208	156	-21.6
chr11:33307959-33309057+	hsa-miR-5682	1	-0.236	-0.221	156	-23.57
chr3:71064700-71102924-	hsa-miR-6165	1			156	-28.2
chr14:99924616-99932150-	hsa-miR-6738-3p	1	-0.239	-0.286	156	-19.89
chr11:33307959-33309057+	hsa-miR-6778-5p	1	-0.232	-0.211	156	-24.86
chr5:167915607-167921655+	hsa-miR-6779-5p	1	-0.273	-0.284	156	-26.86
chr5:142779221-142780417-	hsa-miR-6796-5p	1	-0.148	-0.118	156	-21.95
chr3:157839892-157841780+	hsa-miR-6809-3p	1	-0.192	-0.34	156	-11.25
chr5:142779221-142780417-	hsa-miR-6826-3p	1	-0.237	-0.192	156	-27
chr14:99924616-99932150-	hsa-miR-6832-5p	1	-0.16	-0.199	156	-22.17
chrX:79962926-79975155-	hsa-miR-7106-3p	1	-0.25	-0.194	156	-22.81
chr8:48308936-48320523+	hsa-miR-7161-3p	1		-0.029	156	-24.94
chr3:71064700-71102924-	hsa-miR-8070	1	-0.065	-0.144	156	-16.55
chr14:99924616-99932150-	hsa-miR-8089	1	-0.211	-0.193	156	-27.9
chr11:33307959-33309057+	hsa-miR-1178-3p	1	-0.239	-0.257	155	-14.91
chr10:7839010-7844817+	hsa-miR-1179	1	-0.184	-0.234	155	-17.63
chr11:33307959-33309057+	hsa-miR-1250-5p	1	-0.306	-0.2	155	-20.27
chr3:71064700-71102924-	hsa-miR-1269a	1	-0.195	-0.17	155	-21.04
chr3:71064700-71102924-	hsa-miR-1269b	1	-0.195	-0.17	155	-21.9
chr5:142779221-142780417-	hsa-miR-1271-5p	1	-0.173	-0.165	155	-22.55
chr11:33307959-33309057+	hsa-miR-1283	1	-0.127	-0.241	155	-17.25
chr8:48308936-48320523+	hsa-miR-1289	1	-0.463	-0.37	155	-21.81
chr18:56363598-56367823+	hsa-miR-145-5p	1	-0.1	-0.12	155	-22.02
chr3:149563798-149639014+	hsa-miR-1911-5p	1		-0.067	155	-25.09
chr5:167915607-167921655+	hsa-miR-196a-5p	1	-0.183	-0.158	155	-13.78
chr2:32142995-32157204-	hsa-miR-20a-5p	1	-0.092	-0.153	155	-12.74
chr5:142779221-142780417-	hsa-miR-212-5p	1	-0.414	-0.373	155	-17.24
chr5:142779221-142780417-	hsa-miR-214-3p	1	-0.019	0.02	155	-27.41
chr10:7839010-7844817+	hsa-miR-26a-1-3p	1		-0.036	155	-17.67
chr10:7839010-7844817+	hsa-miR-3140-5p	1	-0.211	-0.307	155	-14.08
chr10:7839010-7844817+	hsa-miR-3182	1	-0.259	-0.35	155	-16.48
chr11:33307959-33309057+	hsa-miR-3190-5p	1	-0.225	-0.236	155	-24.03
chr5:167915607-167921655+	hsa-miR-33a-3p	1	-0.097	-0.35	155	-11.31
chr11:33307959-33309057+	hsa-miR-382-5p	1	-0.09	-0.158	155	-15.08
chr2:61749746-61753656-	hsa-miR-4422	1		-0.017	155	-21.46
chr3:71064700-71102924-	hsa-miR-4445-5p	1	-0.132	-0.203	155	-13.33
chr11:33307959-33309057+	hsa-miR-4482-3p	1	-0.005	-0.162	155	-17.56
chr8:48308936-48320523+	hsa-miR-449c-3p	1	-0.179	-0.16	155	-19.93
chr11:33307959-33309057+	hsa-miR-4637	1	-0.166	-0.243	155	-12.88
chr3:149563798-149639014+	hsa-miR-4647	1	-0.139	-0.18	155	-17.02
chr10:7839010-7844817+	hsa-miR-4647	1	-0.096	-0.147	155	-18.76
chr3:149563798-149639014+	hsa-miR-4661-5p	1		-0.064	155	-29.45
chr11:33307959-33309057+	hsa-miR-4731-5p	1	-0.153	-0.108	155	-27.02
chr10:7839010-7844817+	hsa-miR-4733-5p	1	-0.193	-0.217	155	-15.38
chr5:142779221-142780417-	hsa-miR-4762-3p	1	-0.041	-0.135	155	-17.98
chr14:99924616-99932150-	hsa-miR-488-3p	1	-0.063	-0.113	155	-14.98
chr11:33307959-33309057+	hsa-miR-4999-5p	1	-0.129	-0.138	155	-21.39
chr14:99924616-99932150-	hsa-miR-5001-5p	1	-0.203	-0.141	155	-32.09
chr11:33307959-33309057+	hsa-miR-5003-3p	1	-0.125	-0.266	155	-8.48
chr10:7839010-7844817+	hsa-miR-5009-5p	1		-0.002	155	-22.88
chr5:167915607-167921655+	hsa-miR-500a-5p	1	-0.191	-0.288	155	-15.32
chr5:142779221-142780417-	hsa-miR-520f-3p	1			155	-18.41
chr14:99924616-99932150-	hsa-miR-548j-5p	1	-0.061	-0.244	155	-11.22
chr11:33307959-33309057+	hsa-miR-551b-3p	1	-0.347	-0.195	155	-15.66
chr3:71064700-71102924-	hsa-miR-675-5p	1			155	-29.71
chr14:99924616-99932150-	hsa-miR-6777-3p	1	-0.207	-0.205	155	-28.21
chr11:33307959-33309057+	hsa-miR-6782-3p	1	-0.129	-0.186	155	-21.15
chr5:142779221-142780417-	hsa-miR-6799-3p	1	-0.236	-0.17	155	-24.81
chr14:99924616-99932150-	hsa-miR-6809-3p	1	-0.128	-0.271	155	-15.02
chrX:79962926-79975155-	hsa-miR-6817-3p	1	-0.304	-0.32	155	-23.75
chrX:79962926-79975155-	hsa-miR-6869-5p	1	-0.32	-0.383	155	-20.2
chr3:149563798-149639014+	hsa-miR-6882-3p	1	-0.274	-0.275	155	-22.23
chr10:7839010-7844817+	hsa-miR-7110-3p	1	-0.166	-0.18	155	-17.86
chrX:79962926-79975155-	hsa-miR-7161-3p	1		0.003	155	-21.52
chr3:157839892-157841780+	hsa-miR-769-5p	1		-0.036	155	-27.82
chr5:142779221-142780417-	hsa-miR-7851-3p	1	-0.298	-0.231	155	-26.48
chr2:32142995-32157204-	hsa-miR-7853-5p	1	-0.162	-0.244	155	-13.19
chr3:149563798-149639014+	hsa-miR-889-5p	1	-0.304	-0.265	155	-16.32
chr5:142779221-142780417-	hsa-let-7f-2-3p	1	-0.059	-0.16	154	-12.69
chr2:32142995-32157204-	hsa-miR-1278	1			154	-22.4
chr5:167915607-167921655+	hsa-miR-136-5p	1	-0.153	-0.201	154	-19.02
chr11:33307959-33309057+	hsa-miR-190b	1	-0.184	-0.24	154	-11.26
chr18:56363598-56367823+	hsa-miR-20a-3p	1	-0.207	-0.277	154	-16.11
chr3:149563798-149639014+	hsa-miR-2115-3p	1	-0.088	-0.185	154	-18.79
chr8:48308936-48320523+	hsa-miR-224-3p	1	-0.067	-0.16	154	-12.13
chr2:61749746-61753656-	hsa-miR-23b-3p	1	-0.189	-0.305	154	-15.42
chrX:79962926-79975155-	hsa-miR-29a-5p	1	-0.073	-0.189	154	-15.52
chrX:79962926-79975155-	hsa-miR-29b-3p	1	-0.258	-0.247	154	-17.08
chr11:33307959-33309057+	hsa-miR-30b-3p	1	-0.257	-0.26	154	-18.01
chr5:167915607-167921655+	hsa-miR-3163	1		-0.046	154	-18.24
chr3:71064700-71102924-	hsa-miR-338-3p	1	-0.343	-0.352	154	-19.75
chr5:142779221-142780417-	hsa-miR-34c-5p	1	-0.234	-0.231	154	-19.65
chr3:149563798-149639014+	hsa-miR-3662	1	-0.003	-0.184	154	-14.37
chr5:142779221-142780417-	hsa-miR-3679-3p	1	-0.324	-0.242	154	-13.85
chr11:33307959-33309057+	hsa-miR-3689b-3p	1	-0.257	-0.26	154	-16.68
chr11:33307959-33309057+	hsa-miR-3689c	1	-0.257	-0.26	154	-16.68
chr14:99924616-99932150-	hsa-miR-3911	1	-0.422	-0.358	154	-23.62
chr5:167915607-167921655+	hsa-miR-3928-5p	1	-0.202	-0.2	154	-17.86
chr2:32142995-32157204-	hsa-miR-3974	1	-0.215	-0.262	154	-15.85
chr3:149563798-149639014+	hsa-miR-4443	1	-0.263	-0.249	154	-23.09
chr3:149563798-149639014+	hsa-miR-4446-3p	1			154	-24.35
chr5:142779221-142780417-	hsa-miR-4676-5p	1	-0.139	-0.108	154	-22.67
chr18:56363598-56367823+	hsa-miR-4680-3p	1	-0.062	-0.167	154	-14.2
chr3:71064700-71102924-	hsa-miR-4700-5p	1	-0.217	-0.183	154	-20.36
chr5:167915607-167921655+	hsa-miR-5004-3p	1	-0.155	-0.243	154	-20.05
chr3:157839892-157841780+	hsa-miR-505-5p	1	-0.472	-0.393	154	-22.16
chrX:79962926-79975155-	hsa-miR-513b-3p	1		-0.039	154	-18.83
chr5:142779221-142780417-	hsa-miR-5187-3p	1		-0.017	154	-18.09
chr11:33307959-33309057+	hsa-miR-518a-3p	1			154	-23.66
chr11:33307959-33309057+	hsa-miR-518b	1			154	-21.89
chr8:48308936-48320523+	hsa-miR-522-3p	1	-0.058	-0.145	154	-9.51
chr14:99924616-99932150-	hsa-miR-548a-5p	1	-0.043	-0.213	154	-9.54
chr11:33307959-33309057+	hsa-miR-548s	1	-0.131	-0.153	154	-15.51
chr11:33307959-33309057+	hsa-miR-552-5p	1	-0.077	-0.181	154	-16.72
chr3:71064700-71102924-	hsa-miR-5589-5p	1	-0.345	-0.287	154	-23.4
chr3:157839892-157841780+	hsa-miR-567	1	-0.181	-0.283	154	-13.53
chr5:142779221-142780417-	hsa-miR-5680	1	-0.024	-0.165	154	-11.29
chr10:7839010-7844817+	hsa-miR-5682	1	-0.254	-0.235	154	-19.73
chr5:167915607-167921655+	hsa-miR-5706	1	-0.188	-0.235	154	-15.02
chr5:167915607-167921655+	hsa-miR-578	1	-0.172	-0.283	154	-22.16
chr10:7839010-7844817+	hsa-miR-578	1	-0.083	-0.189	154	-19.69
chr5:167915607-167921655+	hsa-miR-6076	1	-0.397	-0.363	154	-15.21
chr5:142779221-142780417-	hsa-miR-629-5p	1	-0.224	-0.306	154	-17.3
chr11:33307959-33309057+	hsa-miR-6499-3p	1	-0.314	-0.367	154	-12.15
chr5:142779221-142780417-	hsa-miR-6502-5p	1			154	-21.02
chr5:142779221-142780417-	hsa-miR-6740-3p	1	-0.028	-0.073	154	-21.43
chr3:149563798-149639014+	hsa-miR-6764-3p	1	-0.389	-0.419	154	-13.51
chr14:99924616-99932150-	hsa-miR-6768-3p	1	-0.175	-0.181	154	-16.78
chr11:33307959-33309057+	hsa-miR-6779-5p	1	-0.266	-0.275	154	-20.5
chr10:7839010-7844817+	hsa-miR-6828-3p	1	-0.16	-0.16	154	-13.73
chr11:33307959-33309057+	hsa-miR-6835-3p	1	-0.142	-0.222	154	-16.43
chrX:79962926-79975155-	hsa-miR-6853-3p	1	-0.058	-0.153	154	-17.78
chr14:99924616-99932150-	hsa-miR-6856-5p	1	-0.368	-0.387	154	-19.12
chr10:7839010-7844817+	hsa-miR-6888-5p	1	-0.309	-0.333	154	-20.78
chr11:33307959-33309057+	hsa-miR-6894-5p	1	-0.18	-0.179	154	-24.49
chrX:79962926-79975155-	hsa-miR-7159-3p	1	-0.175	-0.372	154	-14.84
chr5:142779221-142780417-	hsa-miR-8089	1	-0.138	-0.141	154	-27.33
chr3:149563798-149639014+	hsa-miR-921	1			154	-26.1
chr3:149563798-149639014+	hsa-miR-1264	1	-0.146	-0.261	153	-16.81
chr14:99924616-99932150-	hsa-miR-1269b	1	-0.274	-0.27	153	-18.16
chr14:99924616-99932150-	hsa-miR-132-3p	1	-0.194	-0.265	153	-18.67
chr11:33307959-33309057+	hsa-miR-143-5p	1	-0.148	-0.145	153	-17.31
chr5:167915607-167921655+	hsa-miR-181c-5p	1	-0.289	-0.441	153	-18.18
chr5:167915607-167921655+	hsa-miR-2278	1	-0.195	-0.208	153	-18.13
chr3:149563798-149639014+	hsa-miR-2682-5p	1	-0.24	-0.229	153	-17.58
chr5:167915607-167921655+	hsa-miR-3138	1	-0.322	-0.314	153	-19.02
chr3:157839892-157841780+	hsa-miR-3160-5p	1	-0.348	-0.401	153	-15.4
chr2:32142995-32157204-	hsa-miR-337-3p	1	-0.163	-0.225	153	-14.26
chr5:167915607-167921655+	hsa-miR-4307	1	-0.029	-0.202	153	-10.44
chr3:71064700-71102924-	hsa-miR-4524b-3p	1	-0.19	-0.242	153	-24.61
chrX:79962926-79975155-	hsa-miR-4709-5p	1	-0.153	-0.209	153	-17.66
chrX:79962926-79975155-	hsa-miR-4725-3p	1	-0.431	-0.431	153	-23.1
chr3:71064700-71102924-	hsa-miR-4736	1		0.014	153	-33.22
chr3:71064700-71102924-	hsa-miR-4747-5p	1	-0.106	-0.111	153	-24.56
chr18:56363598-56367823+	hsa-miR-4753-3p	1	-0.168	-0.297	153	-10.55
chr10:7839010-7844817+	hsa-miR-485-3p	1	-0.254	-0.339	153	-14.78
chr2:32142995-32157204-	hsa-miR-493-3p	1	-0.243	-0.243	153	-22.5
chr10:7839010-7844817+	hsa-miR-513b-3p	1	-0.146	-0.228	153	-8.74
chr11:33307959-33309057+	hsa-miR-518d-3p	1			153	-20.99
chr2:32142995-32157204-	hsa-miR-519b-3p	1	-0.13	-0.157	153	-17.27
chr5:167915607-167921655+	hsa-miR-548aa	1	-0.16	-0.352	153	-8.13
chr5:167915607-167921655+	hsa-miR-548t-3p	1	-0.16	-0.352	153	-8.13
chr11:33307959-33309057+	hsa-miR-548v	1	-0.152	-0.187	153	-17.29
chr11:33307959-33309057+	hsa-miR-561-5p	1	-0.132	-0.193	153	-14.33
chr14:99924616-99932150-	hsa-miR-6074	1	-0.005	-0.132	153	-12.58
chr3:149563798-149639014+	hsa-miR-613	1	-0.264	-0.365	153	-13.74
chr3:149563798-149639014+	hsa-miR-619-3p	1		-0.073	153	-23.87
chr3:71064700-71102924-	hsa-miR-6515-5p	1			153	-22.13
chr11:33307959-33309057+	hsa-miR-653-3p	1	-0.145	-0.164	153	-15.84
chr11:33307959-33309057+	hsa-miR-664b-3p	1	-0.106	-0.356	153	-20.9
chr5:142779221-142780417-	hsa-miR-6735-5p	1		0.009	153	-26.95
chr5:142779221-142780417-	hsa-miR-6757-3p	1	-0.163	-0.196	153	-14.83
chr5:142779221-142780417-	hsa-miR-6762-3p	1	-0.32	-0.229	153	-16.89
chr11:33307959-33309057+	hsa-miR-6822-3p	1	-0.422	-0.362	153	-16.35
chr10:7839010-7844817+	hsa-miR-6824-3p	1			153	-20.88
chr3:71064700-71102924-	hsa-miR-6852-5p	1			153	-27.15
chr3:71064700-71102924-	hsa-miR-6864-5p	1	-0.237	-0.19	153	-23.98
chr5:142779221-142780417-	hsa-miR-6868-3p	1	-0.052	-0.11	153	-20.52
chr3:157839892-157841780+	hsa-miR-6894-3p	1	-0.263	-0.232	153	-17.28
chr11:33307959-33309057+	hsa-miR-7161-5p	1	-0.118	-0.226	153	-17.02
chr10:7839010-7844817+	hsa-miR-889-5p	1	-0.162	-0.143	153	-19.74
chr2:32142995-32157204-	hsa-miR-892a	1	-0.382	-0.44	153	-13.68
chr5:142779221-142780417-	hsa-miR-921	1		0.018	153	-27.76
chr3:157839892-157841780+	hsa-miR-934	1		-0.049	153	-25.75
chr5:167915607-167921655+	hsa-miR-1231	1	-0.354	-0.351	152	-19.83
chr3:149563798-149639014+	hsa-miR-1252-5p	1		-0.045	152	-15.07
chr14:99924616-99932150-	hsa-miR-1289	1		-0.026	152	-26.02
chr5:142779221-142780417-	hsa-miR-1294	1		-0.038	152	-19.47
chrX:79962926-79975155-	hsa-miR-133a-5p	1		-0.086	152	-20.79
chr10:7839010-7844817+	hsa-miR-143-3p	1	-0.143	-0.209	152	-13.57
chrX:79962926-79975155-	hsa-miR-149-5p	1	-0.293	-0.223	152	-21.93
chr2:32142995-32157204-	hsa-miR-154-3p	1		-0.023	152	-15.95
chr2:32142995-32157204-	hsa-miR-190a-3p	1	-0.005	-0.216	152	-12.63
chr10:7839010-7844817+	hsa-miR-19b-1-5p	1		-0.047	152	-18.67
chrX:79962926-79975155-	hsa-miR-19b-2-5p	1		-0.02	152	-15.27
chr11:33307959-33309057+	hsa-miR-224-3p	1	-0.242	-0.424	152	-10.11
chr8:48308936-48320523+	hsa-miR-2355-3p	1	-0.339	-0.394	152	-17.15
chr5:142779221-142780417-	hsa-miR-3140-3p	1		-0.013	152	-18.75
chr18:56363598-56367823+	hsa-miR-3171	1	-0.316	-0.424	152	-16.74
chr11:33307959-33309057+	hsa-miR-3200-5p	1	-0.058	-0.105	152	-17.99
chr3:71064700-71102924-	hsa-miR-3605-5p	1	-0.13	-0.106	152	-18.28
chr10:7839010-7844817+	hsa-miR-3614-3p	1	-0.231	-0.238	152	-15.27
chrX:79962926-79975155-	hsa-miR-3663-3p	1	-0.329	-0.298	152	-21.66
chr5:142779221-142780417-	hsa-miR-3675-3p	1			152	-20.19
chr5:142779221-142780417-	hsa-miR-3929	1	-0.147	-0.151	152	-16.96
chr5:142779221-142780417-	hsa-miR-409-3p	1	-0.024	-0.16	152	-13.56
chr2:32142995-32157204-	hsa-miR-4288	1	-0.226	-0.211	152	-17.77
chr5:142779221-142780417-	hsa-miR-4309	1	-0.399	-0.329	152	-13.65
chr5:142779221-142780417-	hsa-miR-449c-5p	1		-0.021	152	-25.36
chr14:99924616-99932150-	hsa-miR-4670-3p	1	-0.215	-0.36	152	-15.96
chr14:99924616-99932150-	hsa-miR-4680-3p	1	-0.102	-0.23	152	-9.83
chr5:142779221-142780417-	hsa-miR-4713-5p	1	-0.217	-0.23	152	-24.1
chr10:7839010-7844817+	hsa-miR-4715-3p	1	-0.274	-0.255	152	-23.39
chr14:99924616-99932150-	hsa-miR-4726-5p	1	-0.389	-0.188	152	-29.05
chr5:142779221-142780417-	hsa-miR-4728-3p	1	-0.073	-0.095	152	-13.79
chr10:7839010-7844817+	hsa-miR-4743-3p	1	-0.153	-0.233	152	-15.94
chr3:149563798-149639014+	hsa-miR-4762-5p	1	-0.106	-0.225	152	-17.62
chr10:7839010-7844817+	hsa-miR-508-3p	1	-0.177	-0.267	152	-14.68
chr3:71064700-71102924-	hsa-miR-5196-5p	1	-0.069	-0.049	152	-28.87
chr2:32142995-32157204-	hsa-miR-519a-3p	1	-0.13	-0.157	152	-14.72
chr5:142779221-142780417-	hsa-miR-520a-5p	1	-0.127	-0.135	152	-22.66
chr8:48308936-48320523+	hsa-miR-548av-3p	1	-0.103	-0.149	152	-13.45
chr3:149563798-149639014+	hsa-miR-548bb-3p	1	-0.073	-0.244	152	-10.06
chr11:33307959-33309057+	hsa-miR-548u	1	-0.118	-0.226	152	-16.24
chr18:56363598-56367823+	hsa-miR-5580-5p	1		-0.036	152	-16.81
chr10:7839010-7844817+	hsa-miR-5585-3p	1	-0.061	-0.144	152	-15.75
chr2:32142995-32157204-	hsa-miR-586	1	-0.144	-0.219	152	-8.77
chr3:71064700-71102924-	hsa-miR-589-5p	1	-0.187	-0.203	152	-20.93
chr8:48308936-48320523+	hsa-miR-593-3p	1	-0.225	-0.256	152	-14.49
chr3:149563798-149639014+	hsa-miR-6083	1	-0.125	-0.427	152	-9.94
chr18:56363598-56367823+	hsa-miR-619-5p	1	-0.323	-0.288	152	-20.74
chr8:48308936-48320523+	hsa-miR-6734-5p	1	-0.321	-0.292	152	-20.95
chr5:142779221-142780417-	hsa-miR-6755-3p	1	-0.187	-0.198	152	-16.4
chr3:71064700-71102924-	hsa-miR-6758-5p	1	-0.348	-0.345	152	-21.39
chr3:71064700-71102924-	hsa-miR-6763-5p	1	-0.218	-0.176	152	-30.76
chr5:142779221-142780417-	hsa-miR-6782-5p	1	-0.18	-0.133	152	-23.02
chr8:48308936-48320523+	hsa-miR-6783-3p	1	-0.244	-0.232	152	-18.7
chr5:167915607-167921655+	hsa-miR-6806-3p	1	-0.183	-0.169	152	-18.78
chr18:56363598-56367823+	hsa-miR-6808-3p	1	-0.198	-0.157	152	-18.34
chr3:149563798-149639014+	hsa-miR-6824-3p	1	-0.368	-0.415	152	-16.5
chr14:99924616-99932150-	hsa-miR-6825-5p	1	-0.454	-0.341	152	-22.04
chr5:167915607-167921655+	hsa-miR-6893-3p	1	-0.172	-0.153	152	-16.61
chr11:33307959-33309057+	hsa-miR-7150	1	-0.205	-0.171	152	-24.26
chr3:149563798-149639014+	hsa-miR-7515	1	-0.261	-0.299	152	-18.4
chr3:157839892-157841780+	hsa-miR-876-5p	1	-0.116	-0.164	152	-17.7
chr5:142779221-142780417-	hsa-let-7b-3p	1	-0.009	-0.183	151	-12.77
chr8:48308936-48320523+	hsa-miR-103a-2-5p	1	-0.202	-0.292	151	-18.61
chr5:142779221-142780417-	hsa-miR-1200	1	-0.143	-0.147	151	-23.37
chr2:61749746-61753656-	hsa-miR-1250-3p	1	-0.076	-0.236	151	-13.49
chrX:79962926-79975155-	hsa-miR-1255b-2-3p	1		-0.012	151	-20.82
chrX:79962926-79975155-	hsa-miR-1264	1		-0.018	151	-21.66
chr11:33307959-33309057+	hsa-miR-132-3p	1	-0.235	-0.299	151	-15.97
chr10:7839010-7844817+	hsa-miR-144-5p	1	-0.22	-0.276	151	-12.01
chr3:71064700-71102924-	hsa-miR-148b-5p	1	-0.093	-0.142	151	-12.24
chr3:71064700-71102924-	hsa-miR-1537-5p	1	-0.175	-0.188	151	-11.27
chr3:149563798-149639014+	hsa-miR-196b-5p	1	-0.423	-0.439	151	-17.95
chr3:149563798-149639014+	hsa-miR-2052	1	-0.045	-0.148	151	-6.75
chr8:48308936-48320523+	hsa-miR-2113	1			151	-22.65
chr2:61749746-61753656-	hsa-miR-23c	1	-0.189	-0.305	151	-14.13
chr3:71064700-71102924-	hsa-miR-27a-5p	1			151	-27.96
chr14:99924616-99932150-	hsa-miR-296-5p	1	-0.407	-0.315	151	-20.6
chr10:7839010-7844817+	hsa-miR-29a-3p	1	-0.374	-0.315	151	-22.23
chr3:149563798-149639014+	hsa-miR-3123	1	-0.112	-0.209	151	-13.64
chrX:79962926-79975155-	hsa-miR-3126-3p	1	-0.153	-0.129	151	-23.33
chr5:142779221-142780417-	hsa-miR-3198	1	-0.399	-0.329	151	-20.92
chrX:79962926-79975155-	hsa-miR-3591-5p	1		-0.047	151	-14.82
chr5:142779221-142780417-	hsa-miR-3681-3p	1	-0.073	-0.06	151	-21.91
chr3:71064700-71102924-	hsa-miR-3686	1	-0.063	-0.147	151	-15.77
chr11:33307959-33309057+	hsa-miR-3689a-3p	1	-0.238	-0.229	151	-16.99
chrX:79962926-79975155-	hsa-miR-3920	1	-0.083	-0.152	151	-10.41
chr3:157839892-157841780+	hsa-miR-4419b	1	-0.178	-0.178	151	-23.76
chr3:149563798-149639014+	hsa-miR-4441	1	-0.189	-0.176	151	-18
chr3:157839892-157841780+	hsa-miR-4511	1	-0.04	-0.108	151	-16.23
chr3:149563798-149639014+	hsa-miR-4517	1			151	-20.35
chr3:149563798-149639014+	hsa-miR-4524a-3p	1	-0.354	-0.416	151	-19.46
chr5:142779221-142780417-	hsa-miR-4539	1	-0.038	-0.077	151	-24.71
chr3:71064700-71102924-	hsa-miR-4652-3p	1	-0.012	-0.13	151	-14.07
chr3:71064700-71102924-	hsa-miR-4659a-3p	1	-0.088	-0.217	151	-15.78
chr3:71064700-71102924-	hsa-miR-4659b-3p	1	-0.088	-0.217	151	-16.8
chr14:99924616-99932150-	hsa-miR-4709-5p	1	-0.254	-0.355	151	-10.52
chr5:142779221-142780417-	hsa-miR-4715-3p	1	-0.343	-0.249	151	-17.4
chrX:79962926-79975155-	hsa-miR-4716-5p	1	-0.281	-0.351	151	-15.78
chrX:79962926-79975155-	hsa-miR-4728-3p	1	-0.242	-0.251	151	-15.68
chr14:99924616-99932150-	hsa-miR-4740-5p	1	-0.436	-0.386	151	-19.69
chr14:99924616-99932150-	hsa-miR-4753-3p	1	-0.188	-0.399	151	-11.19
chr2:32142995-32157204-	hsa-miR-4753-5p	1		-0.022	151	-20.63
chr5:142779221-142780417-	hsa-miR-4757-3p	1			151	-18.63
chrX:79962926-79975155-	hsa-miR-5047	1	-0.204	-0.192	151	-17.59
chr11:33307959-33309057+	hsa-miR-539-3p	1	-0.165	-0.244	151	-13.01
chr3:71064700-71102924-	hsa-miR-548ar-3p	1		0	151	-12.57
chr3:149563798-149639014+	hsa-miR-548at-5p	1	-0.088	-0.248	151	-10.33
chr5:142779221-142780417-	hsa-miR-548aw	1	-0.009	-0.146	151	-14.17
chr5:142779221-142780417-	hsa-miR-556-3p	1	-0.275	-0.455	151	-12.62
chr5:167915607-167921655+	hsa-miR-597-5p	1	-0.191	-0.189	151	-12.39
chr5:167915607-167921655+	hsa-miR-6074	1	-0.064	-0.198	151	-10.81
chr5:142779221-142780417-	hsa-miR-6499-3p	1	-0.161	-0.202	151	-14
chr14:99924616-99932150-	hsa-miR-6716-3p	1	-0.369	-0.293	151	-15.31
chr3:71064700-71102924-	hsa-miR-6747-5p	1			151	-26.26
chrX:79962926-79975155-	hsa-miR-6776-3p	1		-0.034	151	-26.67
chr5:142779221-142780417-	hsa-miR-6809-3p	1	-0.056	-0.217	151	-13.78
chr3:71064700-71102924-	hsa-miR-6842-5p	1	-0.434	-0.292	151	-24.49
chr8:48308936-48320523+	hsa-miR-6843-3p	1	-0.258	-0.276	151	-16.15
chr3:149563798-149639014+	hsa-miR-6876-3p	1			151	-22.94
chr5:142779221-142780417-	hsa-miR-6878-5p	1		-0.006	151	-17.82
chr5:142779221-142780417-	hsa-miR-6888-3p	1	-0.222	-0.292	151	-15.98
chr5:167915607-167921655+	hsa-miR-7-5p	1	-0.046	-0.052	151	-17.81
chr14:99924616-99932150-	hsa-miR-7156-5p	1			151	-23.76
chr14:99924616-99932150-	hsa-miR-7160-3p	1	-0.3	-0.195	151	-17.91
chr3:71064700-71102924-	hsa-miR-7161-3p	1			151	-25.51
chr8:48308936-48320523+	hsa-miR-7851-3p	1		-0.051	151	-26.47
chrX:79962926-79975155-	hsa-miR-8058	1	-0.308	-0.312	151	-15.09
chr2:32142995-32157204-	hsa-miR-93-5p	1	-0.111	-0.184	151	-15.64
chr11:33307959-33309057+	hsa-miR-1207-5p	1	-0.435	-0.36	150	-25.66
chr3:71064700-71102924-	hsa-miR-122-5p	1	-0.129	-0.106	150	-18.6
chr14:99924616-99932150-	hsa-miR-1269a	1	-0.237	-0.208	150	-20.18
chr8:48308936-48320523+	hsa-miR-1283	1			150	-22.35
chr14:99924616-99932150-	hsa-miR-1288-5p	1		-0.048	150	-18.61
chr3:149563798-149639014+	hsa-miR-1321	1	-0.253	-0.247	150	-22.66
chrX:79962926-79975155-	hsa-miR-1322	1	-0.169	-0.192	150	-11.51
chr3:71064700-71102924-	hsa-miR-15b-3p	1	-0.027	-0.11	150	-10.28
chr18:56363598-56367823+	hsa-miR-181a-2-3p	1	-0.314	-0.353	150	-16.17
chr5:167915607-167921655+	hsa-miR-181a-5p	1	-0.268	-0.437	150	-17.61
chrX:79962926-79975155-	hsa-miR-186-5p	1		-0.021	150	-17.64
chr5:167915607-167921655+	hsa-miR-1912	1		-0.039	150	-22.47
chr11:33307959-33309057+	hsa-miR-199b-5p	1			150	-21.62
chr10:7839010-7844817+	hsa-miR-202-5p	1		-0.037	150	-13.17
chr18:56363598-56367823+	hsa-miR-219b-5p	1	-0.236	-0.21	150	-18.55
chr8:48308936-48320523+	hsa-miR-2682-3p	1		-0.051	150	-23.29
chr10:7839010-7844817+	hsa-miR-29b-1-5p	1	-0.087	-0.126	150	-20.88
chrX:79962926-79975155-	hsa-miR-29c-3p	1	-0.249	-0.231	150	-14.87
chr11:33307959-33309057+	hsa-miR-302d-5p	1	-0.085	-0.236	150	-18.48
chr10:7839010-7844817+	hsa-miR-3074-3p	1	-0.088	-0.157	150	-17.07
chrX:79962926-79975155-	hsa-miR-3129-5p	1		-0.041	150	-22.97
chr14:99924616-99932150-	hsa-miR-3137	1	-0.21	-0.196	150	-18.44
chr5:142779221-142780417-	hsa-miR-3150b-3p	1	-0.124	-0.144	150	-14.75
chr10:7839010-7844817+	hsa-miR-3156-3p	1	-0.312	-0.307	150	-15.45
chr3:71064700-71102924-	hsa-miR-3158-3p	1			150	-23.34
chr2:32142995-32157204-	hsa-miR-3158-5p	1	-0.306	-0.312	150	-15.7
chrX:79962926-79975155-	hsa-miR-3185	1	-0.122	-0.217	150	-16.33
chrX:79962926-79975155-	hsa-miR-3194-3p	1		-0.039	150	-24.11
chr3:149563798-149639014+	hsa-miR-324-5p	1	-0.284	-0.215	150	-17.49
chr3:157839892-157841780+	hsa-miR-330-5p	1	-0.125	-0.101	150	-27.23
chr2:32142995-32157204-	hsa-miR-3678-3p	1	-0.198	-0.2	150	-21.47
chr3:71064700-71102924-	hsa-miR-3689d	1	-0.149	-0.121	150	-17.98
chr5:167915607-167921655+	hsa-miR-370-3p	1	-0.19	-0.184	150	-25.65
chr3:71064700-71102924-	hsa-miR-3907	1	-0.205	-0.146	150	-20.2
chr11:33307959-33309057+	hsa-miR-3935	1	-0.342	-0.422	150	-17.26
chr3:71064700-71102924-	hsa-miR-3976	1	-0.037	-0.055	150	-15.02
chr2:61749746-61753656-	hsa-miR-4251	1	-0.357	-0.509	150	-16.36
chr8:48308936-48320523+	hsa-miR-431-5p	1	-0.396	-0.382	150	-24.61
chr11:33307959-33309057+	hsa-miR-4422	1	-0.09	-0.224	150	-10.72
chr3:71064700-71102924-	hsa-miR-4423-5p	1	-0.343	-0.299	150	-14.55
chr3:71064700-71102924-	hsa-miR-4432	1			150	-14.22
chr5:142779221-142780417-	hsa-miR-4447	1	-0.311	-0.206	150	-20.12
chr11:33307959-33309057+	hsa-miR-4477b	1			150	-18.27
chr3:71064700-71102924-	hsa-miR-4493	1	-0.18	-0.14	150	-19.22
chr18:56363598-56367823+	hsa-miR-4501	1		-0.008	150	-19.71
chr5:142779221-142780417-	hsa-miR-450a-5p	1			150	-14.07
chr5:142779221-142780417-	hsa-miR-4520-2-3p	1	-0.247	-0.24	150	-16.44
chr3:71064700-71102924-	hsa-miR-4632-5p	1	-0.086	-0.04	150	-23.6
chr11:33307959-33309057+	hsa-miR-4652-5p	1	-0.301	-0.263	150	-17.12
chr3:157839892-157841780+	hsa-miR-4657	1			150	-20.94
chr3:71064700-71102924-	hsa-miR-4676-3p	1			150	-29.62
chrX:79962926-79975155-	hsa-miR-4680-3p	1	-0.087	-0.19	150	-10.53
chr3:71064700-71102924-	hsa-miR-4725-3p	1	-0.126	-0.125	150	-27.6
chr14:99924616-99932150-	hsa-miR-4755-3p	1	-0.128	-0.033	150	-18.85
chr10:7839010-7844817+	hsa-miR-4770	1	-0.116	-0.162	150	-15.56
chr14:99924616-99932150-	hsa-miR-4772-5p	1	-0.293	-0.309	150	-12.37
chr3:71064700-71102924-	hsa-miR-490-3p	1	-0.136	-0.109	150	-21.28
chr10:7839010-7844817+	hsa-miR-5004-5p	1	-0.327	-0.274	150	-18.25
chr11:33307959-33309057+	hsa-miR-5093	1	-0.063	-0.158	150	-16.82
chr8:48308936-48320523+	hsa-miR-511-5p	1			150	-19.85
chr11:33307959-33309057+	hsa-miR-518c-3p	1			150	-18.68
chr5:142779221-142780417-	hsa-miR-5197-5p	1	-0.132	-0.157	150	-8.89
chr3:149563798-149639014+	hsa-miR-519d-5p	1		-0.049	150	-20.93
chr14:99924616-99932150-	hsa-miR-541-5p	1	-0.016	-0.069	150	-15.24
chr8:48308936-48320523+	hsa-miR-544a	1	-0.149	-0.204	150	-13.7
chr11:33307959-33309057+	hsa-miR-548m	1			150	-16.08
chr11:33307959-33309057+	hsa-miR-581	1		-0.023	150	-16.56
chr10:7839010-7844817+	hsa-miR-593-5p	1		-0.04	150	-18.21
chr14:99924616-99932150-	hsa-miR-641	1	-0.084	-0.169	150	-11.87
chrX:79962926-79975155-	hsa-miR-645	1	-0.169	-0.125	150	-13.2
chr3:149563798-149639014+	hsa-miR-650	1	-0.345	-0.278	150	-19.5
chr3:71064700-71102924-	hsa-miR-6735-5p	1	-0.086	-0.04	150	-21.88
chr3:157839892-157841780+	hsa-miR-6740-3p	1	-0.131	-0.165	150	-12.3
chr2:32142995-32157204-	hsa-miR-6743-5p	1	-0.229	-0.156	150	-25.21
chr14:99924616-99932150-	hsa-miR-6758-5p	1	-0.379	-0.389	150	-21.5
chr14:99924616-99932150-	hsa-miR-6759-3p	1	-0.178	-0.216	150	-11.83
chr10:7839010-7844817+	hsa-miR-6760-5p	1			150	-22.25
chr3:71064700-71102924-	hsa-miR-6761-5p	1	-0.118	-0.131	150	-20.45
chr5:142779221-142780417-	hsa-miR-6770-5p	1			150	-15.59
chr3:71064700-71102924-	hsa-miR-6774-5p	1			150	-23.93
chr2:32142995-32157204-	hsa-miR-6785-5p	1			150	-24.15
chr5:167915607-167921655+	hsa-miR-6799-5p	1	-0.387	-0.364	150	-23.38
chr3:157839892-157841780+	hsa-miR-6821-3p	1	-0.23	-0.22	150	-16.74
chr3:149563798-149639014+	hsa-miR-6832-3p	1	-0.104	-0.173	150	-12.19
chr5:167915607-167921655+	hsa-miR-6837-5p	1			150	-28.53
chr3:157839892-157841780+	hsa-miR-6868-3p	1	-0.214	-0.255	150	-19.39
chr3:71064700-71102924-	hsa-miR-6874-3p	1	-0.093	-0.142	150	-16.94
chrX:79962926-79975155-	hsa-miR-6884-3p	1			150	-21.04
chr8:48308936-48320523+	hsa-miR-7155-5p	1			150	-28.72
chr10:7839010-7844817+	hsa-miR-766-5p	1	-0.326	-0.385	150	-14.73
chr11:33307959-33309057+	hsa-miR-8057	1	-0.411	-0.381	150	-14.28
chr5:142779221-142780417-	hsa-miR-885-3p	1		0.006	150	-31.12
chr5:142779221-142780417-	hsa-miR-885-5p	1			150	-26.38
chr18:56363598-56367823+	hsa-miR-892b	1	-0.21	-0.179	150	-21.36
chrX:79962926-79975155-	hsa-miR-937-3p	1			150	-22.48
chr3:149563798-149639014+	hsa-let-7g-3p	1	-0.206	-0.252	149	-12.8
chr11:33307959-33309057+	hsa-miR-10b-5p	1	-0.283	-0.278	149	-23.72
chrX:79962926-79975155-	hsa-miR-1237-3p	1		-0.001	149	-24.32
chr2:32142995-32157204-	hsa-miR-127-3p	1	-0.374	-0.231	149	-19.29
chr11:33307959-33309057+	hsa-miR-1278	1	-0.154	-0.175	149	-14.6
chr5:142779221-142780417-	hsa-miR-1291	1	-0.387	-0.262	149	-26.71
chr14:99924616-99932150-	hsa-miR-1343-3p	1	-0.318	-0.227	149	-21.28
chr3:149563798-149639014+	hsa-miR-149-5p	1			149	-23.84
chr14:99924616-99932150-	hsa-miR-1538	1			149	-33.05
chr14:99924616-99932150-	hsa-miR-182-5p	1			149	-17.43
chrX:79962926-79975155-	hsa-miR-197-3p	1		-0.029	149	-23.41
chr10:7839010-7844817+	hsa-miR-208b-5p	1	-0.123	-0.23	149	-7.73
chr3:71064700-71102924-	hsa-miR-2392	1	-0.151	-0.131	149	-22.79
chr3:157839892-157841780+	hsa-miR-297	1	-0.118	-0.178	149	-12.28
chrX:79962926-79975155-	hsa-miR-29a-3p	1	-0.249	-0.231	149	-13.06
chr11:33307959-33309057+	hsa-miR-29b-1-5p	1			149	-22.14
chr10:7839010-7844817+	hsa-miR-30d-3p	1			149	-14.85
chr3:149563798-149639014+	hsa-miR-3143	1		-0.013	149	-13.74
chr3:71064700-71102924-	hsa-miR-3173-3p	1	-0.358	-0.39	149	-17.97
chr3:71064700-71102924-	hsa-miR-3180-5p	1	-0.169	-0.222	149	-14.61
chr3:71064700-71102924-	hsa-miR-3190-5p	1	-0.185	-0.139	149	-20.7
chrX:79962926-79975155-	hsa-miR-3193	1	-0.493	-0.341	149	-19.89
chr5:142779221-142780417-	hsa-miR-342-3p	1	-0.149	-0.164	149	-19.17
chr10:7839010-7844817+	hsa-miR-3691-5p	1			149	-20.88
chr8:48308936-48320523+	hsa-miR-3692-3p	1		-0.059	149	-18.84
chr14:99924616-99932150-	hsa-miR-371a-3p	1		-0.035	149	-19.34
chr3:149563798-149639014+	hsa-miR-4270	1	-0.189	-0.176	149	-17.71
chr3:71064700-71102924-	hsa-miR-4271	1	-0.117	-0.11	149	-21.34
chr3:149563798-149639014+	hsa-miR-431-5p	1		-0.047	149	-22.41
chr8:48308936-48320523+	hsa-miR-4320	1	-0.131	-0.137	149	-16.17
chr5:167915607-167921655+	hsa-miR-4432	1	-0.22	-0.281	149	-12.89
chr5:142779221-142780417-	hsa-miR-4452	1			149	-17.67
chr3:71064700-71102924-	hsa-miR-4477b	1	-0.07	-0.142	149	-13.78
chrX:79962926-79975155-	hsa-miR-4490	1	-0.244	-0.286	149	-16.44
chr10:7839010-7844817+	hsa-miR-452-3p	1	-0.28	-0.394	149	-11.64
chr2:32142995-32157204-	hsa-miR-4527	1		-0.05	149	-20.24
chr8:48308936-48320523+	hsa-miR-4647	1			149	-15.24
chr5:142779221-142780417-	hsa-miR-4659a-3p	1	-0.143	-0.283	149	-13.87
chr5:142779221-142780417-	hsa-miR-4700-5p	1	-0.129	-0.125	149	-20.77
chr3:157839892-157841780+	hsa-miR-4999-5p	1	-0.148	-0.153	149	-9.3
chr18:56363598-56367823+	hsa-miR-5002-3p	1	-0.348	-0.315	149	-18.45
chr5:167915607-167921655+	hsa-miR-513a-3p	1		-0.038	149	-7.67
chr5:167915607-167921655+	hsa-miR-513c-3p	1		-0.038	149	-7.67
chr14:99924616-99932150-	hsa-miR-518c-3p	1			149	-21.46
chr3:157839892-157841780+	hsa-miR-518c-5p	1	-0.327	-0.314	149	-16.26
chr11:33307959-33309057+	hsa-miR-518e-3p	1			149	-22.35
chr18:56363598-56367823+	hsa-miR-5195-3p	1	-0.091	-0.105	149	-15.89
chr2:32142995-32157204-	hsa-miR-519d-3p	1	-0.102	-0.169	149	-11.38
chr2:32142995-32157204-	hsa-miR-526b-3p	1	-0.102	-0.169	149	-16.32
chr5:142779221-142780417-	hsa-miR-545-5p	1	-0.012	-0.109	149	-13.75
chr2:32142995-32157204-	hsa-miR-548ai	1			149	-12.11
chr11:33307959-33309057+	hsa-miR-551a	1	-0.337	-0.18	149	-15.43
chr11:33307959-33309057+	hsa-miR-5580-3p	1	-0.1	-0.198	149	-14.49
chr5:142779221-142780417-	hsa-miR-5695	1	-0.203	-0.241	149	-13.4
chr5:142779221-142780417-	hsa-miR-5696	1			149	-15.75
chr2:32142995-32157204-	hsa-miR-570-5p	1			149	-12.11
chr10:7839010-7844817+	hsa-miR-609	1		-0.031	149	-17.68
chrX:79962926-79975155-	hsa-miR-628-5p	1	-0.178	-0.161	149	-11.58
chr3:149563798-149639014+	hsa-miR-647	1	-0.231	-0.206	149	-20.21
chr14:99924616-99932150-	hsa-miR-6504-5p	1	-0.291	-0.292	149	-16.18
chr11:33307959-33309057+	hsa-miR-6715b-5p	1		-0.076	149	-23.5
chr18:56363598-56367823+	hsa-miR-6730-5p	1		-0.051	149	-19.03
chrX:79962926-79975155-	hsa-miR-6738-3p	1			149	-24.92
chr11:33307959-33309057+	hsa-miR-6751-3p	1	-0.257	-0.243	149	-16.71
chr18:56363598-56367823+	hsa-miR-6807-3p	1	-0.204	-0.234	149	-15.56
chr11:33307959-33309057+	hsa-miR-6829-5p	1		-0.044	149	-26.12
chr3:157839892-157841780+	hsa-miR-6830-3p	1			149	-13.05
chr10:7839010-7844817+	hsa-miR-6839-3p	1			149	-16.57
chr5:142779221-142780417-	hsa-miR-6840-5p	1	-0.259	-0.087	149	-25.45
chr10:7839010-7844817+	hsa-miR-6851-5p	1	-0.271	-0.255	149	-16.72
chr3:157839892-157841780+	hsa-miR-7154-3p	1	-0.199	-0.155	149	-24.75
chr3:149563798-149639014+	hsa-miR-7154-3p	1			149	-24.11
chr5:142779221-142780417-	hsa-miR-9-5p	1	-0.032	-0.104	149	-12.84
chr14:99924616-99932150-	hsa-miR-96-3p	1	-0.147	-0.197	149	-11.13
chr5:142779221-142780417-	hsa-miR-100-3p	1	-0.099	-0.143	148	-12.82
chr11:33307959-33309057+	hsa-miR-106a-3p	1	-0.158	-0.205	148	-14.98
chr2:32142995-32157204-	hsa-miR-106a-5p	1	-0.102	-0.169	148	-14.16
chr10:7839010-7844817+	hsa-miR-1178-3p	1	-0.169	-0.144	148	-14.8
chr3:149563798-149639014+	hsa-miR-1229-5p	1			148	-21.75
chr11:33307959-33309057+	hsa-miR-124-3p	1	-0.273	-0.303	148	-14.83
chr10:7839010-7844817+	hsa-miR-1248	1		-0.032	148	-13.61
chrX:79962926-79975155-	hsa-miR-1266-5p	1			148	-23.99
chr2:32142995-32157204-	hsa-miR-1272	1	-0.052	-0.091	148	-16.19
chr18:56363598-56367823+	hsa-miR-1288-3p	1		-0.044	148	-24.62
chr14:99924616-99932150-	hsa-miR-1304-3p	1	-0.115	-0.142	148	-14.78
chr10:7839010-7844817+	hsa-miR-130b-5p	1		-0.019	148	-21.8
chr10:7839010-7844817+	hsa-miR-1323	1			148	-20.26
chr14:99924616-99932150-	hsa-miR-138-2-3p	1			148	-14.53
chr5:142779221-142780417-	hsa-miR-145-5p	1			148	-19.48
chr10:7839010-7844817+	hsa-miR-16-5p	1	-0.06	-0.048	148	-17.63
chr2:32142995-32157204-	hsa-miR-17-5p	1	-0.102	-0.169	148	-13.78
chr5:142779221-142780417-	hsa-miR-182-5p	1			148	-18.74
chr10:7839010-7844817+	hsa-miR-182-5p	1			148	-17.71
chrX:79962926-79975155-	hsa-miR-190a-5p	1	-0.097	-0.146	148	-9.93
chrX:79962926-79975155-	hsa-miR-1914-5p	1			148	-23.04
chr3:71064700-71102924-	hsa-miR-196b-5p	1			148	-27.76
chrX:79962926-79975155-	hsa-miR-19b-1-5p	1		-0.018	148	-13.91
chr3:71064700-71102924-	hsa-miR-212-5p	1	-0.115	-0.087	148	-18.21
chr5:142779221-142780417-	hsa-miR-2355-3p	1			148	-18.3
chr5:142779221-142780417-	hsa-miR-2355-5p	1	-0.217	-0.179	148	-14.62
chr5:142779221-142780417-	hsa-miR-3160-5p	1	-0.246	-0.348	148	-14.7
chr5:142779221-142780417-	hsa-miR-3188	1	-0.111	-0.116	148	-22.9
chr5:142779221-142780417-	hsa-miR-323a-3p	1	-0.136	-0.285	148	-10.26
chrX:79962926-79975155-	hsa-miR-340-5p	1	-0.036	-0.234	148	-11.86
chr5:142779221-142780417-	hsa-miR-34b-5p	1		-0.023	148	-20.9
chr11:33307959-33309057+	hsa-miR-3605-5p	1	-0.221	-0.24	148	-17.23
chr10:7839010-7844817+	hsa-miR-3616-3p	1		-0.051	148	-26.39
chr5:142779221-142780417-	hsa-miR-3619-5p	1	-0.008	0.025	148	-22.66
chr5:142779221-142780417-	hsa-miR-3660	1	-0.157	-0.174	148	-13.41
chr10:7839010-7844817+	hsa-miR-3689d	1	-0.289	-0.286	148	-17.72
chr5:167915607-167921655+	hsa-miR-373-3p	1			148	-21.8
chr5:142779221-142780417-	hsa-miR-382-5p	1	-0.077	-0.13	148	-14.16
chr11:33307959-33309057+	hsa-miR-383-3p	1	-0.209	-0.238	148	-17.14
chr3:71064700-71102924-	hsa-miR-3911	1	-0.17	-0.164	148	-20.12
chr11:33307959-33309057+	hsa-miR-3920	1		-0.021	148	-16.58
chr8:48308936-48320523+	hsa-miR-4309	1	-0.179	-0.147	148	-20.22
chrX:79962926-79975155-	hsa-miR-4474-5p	1	-0.388	-0.407	148	-13.81
chr14:99924616-99932150-	hsa-miR-4492	1	-0.222	-0.172	148	-22.92
chr3:149563798-149639014+	hsa-miR-4520-3p	1	-0.187	-0.165	148	-16.4
chr5:142779221-142780417-	hsa-miR-4644	1			148	-19.34
chr5:142779221-142780417-	hsa-miR-4650-3p	1			148	-18.19
chr8:48308936-48320523+	hsa-miR-4652-3p	1			148	-19.1
chr5:167915607-167921655+	hsa-miR-4659a-3p	1	-0.267	-0.485	148	-12.67
chr5:167915607-167921655+	hsa-miR-4659b-3p	1	-0.267	-0.485	148	-12.77
chr3:71064700-71102924-	hsa-miR-4664-5p	1	-0.282	-0.205	148	-18.04
chr5:142779221-142780417-	hsa-miR-4664-5p	1	-0.256	-0.188	148	-16.01
chr11:33307959-33309057+	hsa-miR-4709-5p	1		-0.052	148	-20.6
chr5:167915607-167921655+	hsa-miR-4729	1			148	-16.78
chr18:56363598-56367823+	hsa-miR-4745-3p	1		-0.043	148	-29.63
chr5:142779221-142780417-	hsa-miR-4748	1	-0.099	-0.16	148	-15.35
chr3:149563798-149639014+	hsa-miR-4760-3p	1	-0.02	-0.167	148	-7.56
chr11:33307959-33309057+	hsa-miR-4763-3p	1	-0.414	-0.356	148	-21.12
chr3:71064700-71102924-	hsa-miR-4765	1	-0.156	-0.163	148	-10.35
chrX:79962926-79975155-	hsa-miR-4778-3p	1			148	-26.62
chr3:71064700-71102924-	hsa-miR-4781-3p	1		-0.025	148	-17.52
chr5:167915607-167921655+	hsa-miR-4791	1	-0.266	-0.291	148	-13.43
chr10:7839010-7844817+	hsa-miR-4793-5p	1	-0.223	-0.21	148	-16.11
chrX:79962926-79975155-	hsa-miR-4797-5p	1	-0.214	-0.277	148	-16.44
chr2:61749746-61753656-	hsa-miR-498	1			148	-20.04
chr3:157839892-157841780+	hsa-miR-5004-3p	1			148	-27.43
chrX:79962926-79975155-	hsa-miR-5004-3p	1			148	-18.93
chr5:142779221-142780417-	hsa-miR-508-5p	1		-0.025	148	-26.78
chr11:33307959-33309057+	hsa-miR-518f-3p	1			148	-20.45
chr5:142779221-142780417-	hsa-miR-545-3p	1		-0.011	148	-9.92
chr14:99924616-99932150-	hsa-miR-548aj-5p	1		-0.057	148	-16.06
chr5:142779221-142780417-	hsa-miR-548aj-5p	1		-0.036	148	-13.86
chr5:142779221-142780417-	hsa-miR-548ar-5p	1			148	-12.25
chr14:99924616-99932150-	hsa-miR-548g-5p	1		-0.057	148	-16.06
chr5:142779221-142780417-	hsa-miR-548g-5p	1		-0.036	148	-13.86
chr5:142779221-142780417-	hsa-miR-548j-3p	1	-0.003	-0.183	148	-7.54
chr18:56363598-56367823+	hsa-miR-548u	1		0.005	148	-17.53
chr14:99924616-99932150-	hsa-miR-548x-5p	1		-0.057	148	-16.06
chr5:142779221-142780417-	hsa-miR-548x-5p	1		-0.036	148	-13.86
chr5:142779221-142780417-	hsa-miR-5681a	1	-0.191	-0.232	148	-15.44
chr14:99924616-99932150-	hsa-miR-581	1	-0.171	-0.219	148	-14.15
chr10:7839010-7844817+	hsa-miR-582-3p	1	-0.108	-0.13	148	-14.42
chrX:79962926-79975155-	hsa-miR-597-3p	1		-0.049	148	-21.35
chr2:61749746-61753656-	hsa-miR-599	1	-0.173	-0.219	148	-12.05
chr11:33307959-33309057+	hsa-miR-599	1	-0.124	-0.173	148	-15.71
chr10:7839010-7844817+	hsa-miR-610	1	-0.194	-0.204	148	-11.49
chr10:7839010-7844817+	hsa-miR-6124	1	-0.105	-0.231	148	-20.17
chr10:7839010-7844817+	hsa-miR-627-3p	1	-0.026	-0.168	148	-8.87
chr5:142779221-142780417-	hsa-miR-639	1	-0.564	-0.368	148	-21.7
chr5:142779221-142780417-	hsa-miR-647	1	-0.216	-0.173	148	-12.79
chrX:79962926-79975155-	hsa-miR-6501-3p	1	-0.296	-0.302	148	-20.47
chr5:142779221-142780417-	hsa-miR-6507-3p	1		-0.05	148	-20.15
chr11:33307959-33309057+	hsa-miR-6514-5p	1		-0.04	148	-25.23
chr18:56363598-56367823+	hsa-miR-664a-3p	1	-0.205	-0.457	148	-10.99
chrX:79962926-79975155-	hsa-miR-670-5p	1	-0.209	-0.189	148	-13.11
chr3:71064700-71102924-	hsa-miR-6755-3p	1		-0.014	148	-17.11
chr11:33307959-33309057+	hsa-miR-6759-3p	1	-0.236	-0.271	148	-21.04
chr14:99924616-99932150-	hsa-miR-6763-5p	1	-0.192	-0.162	148	-23.41
chr5:142779221-142780417-	hsa-miR-6765-5p	1			148	-37.68
chr14:99924616-99932150-	hsa-miR-6774-5p	1			148	-30.32
chr11:33307959-33309057+	hsa-miR-6780a-5p	1	-0.238	-0.229	148	-18.04
chr5:142779221-142780417-	hsa-miR-6783-5p	1			148	-23.47
chr5:142779221-142780417-	hsa-miR-6792-3p	1	-0.151	-0.144	148	-19.5
chr5:142779221-142780417-	hsa-miR-6810-5p	1	-0.117	-0.079	148	-18.19
chrX:79962926-79975155-	hsa-miR-6811-3p	1	-0.474	-0.459	148	-15.25
chr14:99924616-99932150-	hsa-miR-6832-3p	1		-0.043	148	-12.79
chr5:142779221-142780417-	hsa-miR-6847-5p	1	-0.054	-0.064	148	-14.7
chr10:7839010-7844817+	hsa-miR-6855-3p	1	-0.267	-0.247	148	-14.47
chr5:142779221-142780417-	hsa-miR-6858-5p	1			148	-22.65
chr3:157839892-157841780+	hsa-miR-6884-5p	1	-0.212	-0.205	148	-17.7
chr3:149563798-149639014+	hsa-miR-708-5p	1			148	-19.2
chr5:167915607-167921655+	hsa-miR-7156-3p	1	-0.306	-0.279	148	-14.11
chrX:79962926-79975155-	hsa-miR-7156-5p	1	-0.291	-0.344	148	-18.74
chr3:71064700-71102924-	hsa-miR-7160-5p	1	-0.286	-0.195	148	-23.61
chr8:48308936-48320523+	hsa-miR-7162-3p	1	-0.319	-0.33	148	-20.2
chr2:32142995-32157204-	hsa-miR-7855-5p	1			148	-21.91
chr3:157839892-157841780+	hsa-miR-8058	1			148	-22.86
chr11:33307959-33309057+	hsa-miR-876-5p	1	-0.123	-0.207	148	-14.65
chr14:99924616-99932150-	hsa-miR-891a-3p	1			148	-21.65
chr5:142779221-142780417-	hsa-miR-922	1	-0.039	-0.052	148	-18.57
chr5:142779221-142780417-	hsa-miR-95-3p	1		-0.036	148	-17.21
chr5:142779221-142780417-	hsa-miR-9500	1	-0.17	-0.183	148	-14.46
chr3:149563798-149639014+	hsa-miR-1-3p	1	-0.254	-0.362	147	-11.17
chr18:56363598-56367823+	hsa-miR-100-3p	1			147	-19.63
chr14:99924616-99932150-	hsa-miR-10b-3p	1	-0.15	-0.217	147	-14.33
chr5:142779221-142780417-	hsa-miR-1252-3p	1	-0.014	-0.157	147	-11.18
chr5:142779221-142780417-	hsa-miR-1262	1		-0.02	147	-22.69
chr5:142779221-142780417-	hsa-miR-1266-5p	1			147	-25.87
chr3:71064700-71102924-	hsa-miR-1273g-3p	1		-0.044	147	-25.49
chr3:71064700-71102924-	hsa-miR-1275	1			147	-23.63
chr10:7839010-7844817+	hsa-miR-1296-3p	1	-0.175	-0.13	147	-22.62
chr14:99924616-99932150-	hsa-miR-141-3p	1	-0.123	-0.196	147	-13.69
chr2:61749746-61753656-	hsa-miR-141-5p	1	-0.192	-0.234	147	-13.36
chr5:142779221-142780417-	hsa-miR-1468-3p	1	-0.027	-0.213	147	-11.86
chr11:33307959-33309057+	hsa-miR-152-3p	1	-0.365	-0.349	147	-21.24
chr3:71064700-71102924-	hsa-miR-18a-5p	1	-0.169	-0.141	147	-16.34
chr10:7839010-7844817+	hsa-miR-1910-5p	1	-0.162	-0.162	147	-14.54
chr5:167915607-167921655+	hsa-miR-196b-5p	1	-0.183	-0.158	147	-15.51
chr11:33307959-33309057+	hsa-miR-205-3p	1		-0.058	147	-17.53
chr3:71064700-71102924-	hsa-miR-2861	1	-0.214	-0.13	147	-24.95
chr3:71064700-71102924-	hsa-miR-299-3p	1	-0.185	-0.161	147	-17.07
chrX:79962926-79975155-	hsa-miR-29b-1-5p	1			147	-16.59
chr10:7839010-7844817+	hsa-miR-29c-3p	1	-0.374	-0.315	147	-21.59
chrX:79962926-79975155-	hsa-miR-3140-5p	1	-0.168	-0.217	147	-11.88
chr5:142779221-142780417-	hsa-miR-3153	1			147	-25.13
chr3:149563798-149639014+	hsa-miR-3161	1	-0.093	-0.163	147	-9.65
chr5:142779221-142780417-	hsa-miR-3191-5p	1	-0.231	-0.268	147	-17.48
chr3:157839892-157841780+	hsa-miR-3191-5p	1	-0.18	-0.196	147	-16.09
chr10:7839010-7844817+	hsa-miR-32-3p	1	-0.007	-0.19	147	-6.08
chr5:167915607-167921655+	hsa-miR-3201	1	-0.245	-0.287	147	-12.24
chr3:149563798-149639014+	hsa-miR-3202	1	-0.285	-0.301	147	-17.13
chr3:149563798-149639014+	hsa-miR-3612	1	-0.345	-0.278	147	-16.21
chr3:157839892-157841780+	hsa-miR-3667-3p	1	-0.307	-0.351	147	-17.73
chr14:99924616-99932150-	hsa-miR-3687	1		-0.058	147	-22.09
chr14:99924616-99932150-	hsa-miR-372-5p	1	-0.002	-0.075	147	-14.91
chr11:33307959-33309057+	hsa-miR-373-5p	1		-0.043	147	-15.27
chr3:149563798-149639014+	hsa-miR-374a-3p	1			147	-13.31
chr14:99924616-99932150-	hsa-miR-3973	1	-0.136	-0.307	147	-8.72
chrX:79962926-79975155-	hsa-miR-4272	1	-0.108	-0.22	147	-14.59
chr2:32142995-32157204-	hsa-miR-429	1	-0.117	-0.212	147	-12.16
chr11:33307959-33309057+	hsa-miR-4314	1			147	-16.02
chr10:7839010-7844817+	hsa-miR-4447	1	-0.202	-0.142	147	-17.7
chr14:99924616-99932150-	hsa-miR-4461	1		-0.032	147	-17.1
chr14:99924616-99932150-	hsa-miR-4491	1		-0.034	147	-21.57
chr3:71064700-71102924-	hsa-miR-4524a-3p	1		-0.003	147	-24.11
chr11:33307959-33309057+	hsa-miR-4536-5p	1	-0.25	-0.225	147	-20.74
chrX:79962926-79975155-	hsa-miR-4657	1	-0.234	-0.264	147	-17.05
chr8:48308936-48320523+	hsa-miR-4659a-3p	1	-0.077	-0.184	147	-12.02
chr8:48308936-48320523+	hsa-miR-4659b-3p	1	-0.077	-0.184	147	-12.02
chr14:99924616-99932150-	hsa-miR-4660	1	-0.216	-0.175	147	-19.19
chr3:149563798-149639014+	hsa-miR-4668-3p	1			147	-16.57
chr2:61749746-61753656-	hsa-miR-4671-3p	1			147	-14.82
chr10:7839010-7844817+	hsa-miR-4677-5p	1			147	-13.31
chr14:99924616-99932150-	hsa-miR-4687-5p	1	-0.277	-0.222	147	-13.79
chr3:71064700-71102924-	hsa-miR-4689	1		-0.015	147	-21.99
chrX:79962926-79975155-	hsa-miR-4691-5p	1			147	-25
chrX:79962926-79975155-	hsa-miR-4701-5p	1			147	-21.82
chr11:33307959-33309057+	hsa-miR-4717-3p	1			147	-23.92
chr3:71064700-71102924-	hsa-miR-4721	1	-0.375	-0.221	147	-24.44
chr10:7839010-7844817+	hsa-miR-4744	1	-0.092	-0.181	147	-10.92
chr5:142779221-142780417-	hsa-miR-4747-5p	1			147	-25.88
chr3:71064700-71102924-	hsa-miR-4766-5p	1		-0.002	147	-17.3
chr14:99924616-99932150-	hsa-miR-4775	1			147	-11.38
chr11:33307959-33309057+	hsa-miR-495-3p	1	-0.106	-0.251	147	-14.42
chr2:32142995-32157204-	hsa-miR-4999-5p	1	-0.252	-0.282	147	-16.83
chr14:99924616-99932150-	hsa-miR-5088-5p	1			147	-20.5
chr3:71064700-71102924-	hsa-miR-509-3p	1		-0.009	147	-20.88
chr5:142779221-142780417-	hsa-miR-515-5p	1	-0.029	-0.085	147	-15.13
chr10:7839010-7844817+	hsa-miR-5197-5p	1			147	-16.68
chr10:7839010-7844817+	hsa-miR-520f-5p	1			147	-18.54
chr10:7839010-7844817+	hsa-miR-539-3p	1	-0.254	-0.339	147	-10.58
chr18:56363598-56367823+	hsa-miR-548aj-5p	1		-0.052	147	-11.25
chr18:56363598-56367823+	hsa-miR-548g-5p	1		-0.052	147	-11.25
chr18:56363598-56367823+	hsa-miR-548x-5p	1		-0.052	147	-11.25
chr8:48308936-48320523+	hsa-miR-5591-5p	1			147	-24.97
chrX:79962926-79975155-	hsa-miR-5693	1	-0.331	-0.284	147	-18.92
chr11:33307959-33309057+	hsa-miR-5693	1	-0.209	-0.196	147	-19.86
chr14:99924616-99932150-	hsa-miR-580-3p	1	-0.188	-0.336	147	-10.91
chr5:142779221-142780417-	hsa-miR-582-3p	1		0.007	147	-16.08
chr3:149563798-149639014+	hsa-miR-586	1	-0.16	-0.259	147	-8.31
chr14:99924616-99932150-	hsa-miR-593-5p	1		-0.035	147	-22.53
chr5:142779221-142780417-	hsa-miR-597-3p	1	-0.106	-0.101	147	-16.8
chr10:7839010-7844817+	hsa-miR-607	1		-0.044	147	-13.01
chr11:33307959-33309057+	hsa-miR-6078	1		0.003	147	-26.8
chrX:79962926-79975155-	hsa-miR-616-3p	1	-0.14	-0.185	147	-16.72
chr14:99924616-99932150-	hsa-miR-616-5p	1		-0.016	147	-17.64
chr2:32142995-32157204-	hsa-miR-6500-3p	1	-0.169	-0.21	147	-12.78
chr14:99924616-99932150-	hsa-miR-6516-3p	1	-0.154	-0.226	147	-11.86
chr3:71064700-71102924-	hsa-miR-653-5p	1	-0.015	-0.059	147	-10.32
chr10:7839010-7844817+	hsa-miR-6728-3p	1	-0.106	-0.102	147	-16.54
chr18:56363598-56367823+	hsa-miR-6728-5p	1	-0.198	-0.181	147	-25.18
chr5:142779221-142780417-	hsa-miR-6751-3p	1	-0.26	-0.23	147	-15.9
chr5:167915607-167921655+	hsa-miR-6761-5p	1	-0.113	-0.13	147	-24.11
chr3:157839892-157841780+	hsa-miR-6762-5p	1			147	-23.64
chr2:61749746-61753656-	hsa-miR-6772-3p	1	-0.3	-0.3	147	-17.23
chr2:32142995-32157204-	hsa-miR-6775-5p	1		-0.026	147	-28.2
chr14:99924616-99932150-	hsa-miR-6783-3p	1	-0.297	-0.223	147	-21.02
chr10:7839010-7844817+	hsa-miR-6801-5p	1	-0.35	-0.359	147	-17.38
chr18:56363598-56367823+	hsa-miR-6807-5p	1			147	-17.79
chr3:149563798-149639014+	hsa-miR-6815-5p	1	-0.225	-0.159	147	-20.45
chr3:71064700-71102924-	hsa-miR-6832-5p	1		0.004	147	-23.31
chrX:79962926-79975155-	hsa-miR-6833-5p	1	-0.177	-0.2	147	-12.15
chr5:142779221-142780417-	hsa-miR-6845-3p	1			147	-24.68
chr5:142779221-142780417-	hsa-miR-6849-5p	1	-0.048	-0.036	147	-18.39
chr11:33307959-33309057+	hsa-miR-6857-3p	1	-0.422	-0.456	147	-14.13
chr10:7839010-7844817+	hsa-miR-6875-3p	1	-0.073	-0.187	147	-11.57
chr3:149563798-149639014+	hsa-miR-6878-3p	1			147	-16.61
chr3:149563798-149639014+	hsa-miR-6880-5p	1	-0.326	-0.27	147	-24.85
chr5:142779221-142780417-	hsa-miR-7113-5p	1	-0.251	-0.222	147	-20.91
chr5:142779221-142780417-	hsa-miR-7155-5p	1	-0.237	-0.195	147	-13.77
chr3:149563798-149639014+	hsa-miR-7847-3p	1	-0.169	-0.131	147	-17.87
chr10:7839010-7844817+	hsa-miR-7856-5p	1			147	-14.25
chr3:71064700-71102924-	hsa-miR-8085	1			147	-28.92
chr5:142779221-142780417-	hsa-miR-8086	1			147	-25.46
chr3:149563798-149639014+	hsa-miR-8087	1		-0.012	147	-15.89
chr14:99924616-99932150-	hsa-miR-874-5p	1	-0.311	-0.239	147	-20.67
chrX:79962926-79975155-	hsa-miR-876-5p	1			147	-21.07
chrX:79962926-79975155-	hsa-miR-924	1	-0.264	-0.277	147	-14.84
chr14:99924616-99932150-	hsa-miR-939-3p	1	-0.379	-0.26	147	-21.97
chr11:33307959-33309057+	hsa-miR-99b-3p	1	-0.413	-0.417	147	-13.83
chr2:32142995-32157204-	hsa-miR-106b-5p	1	-0.102	-0.169	146	-11.76
chr11:33307959-33309057+	hsa-miR-1179	1	-0.164	-0.214	146	-12.28
chr10:7839010-7844817+	hsa-miR-1197	1	-0.174	-0.156	146	-13.61
chr14:99924616-99932150-	hsa-miR-122-5p	1	-0.18	-0.168	146	-14.63
chr10:7839010-7844817+	hsa-miR-1255a	1			146	-16.47
chr3:157839892-157841780+	hsa-miR-1265	1			146	-17.49
chr5:142779221-142780417-	hsa-miR-1270	1			146	-22.32
chr3:149563798-149639014+	hsa-miR-1272	1			146	-12.04
chr14:99924616-99932150-	hsa-miR-1288-3p	1	-0.194	-0.124	146	-23.32
chr2:61749746-61753656-	hsa-miR-130a-5p	1	-0.171	-0.274	146	-11.62
chr5:142779221-142780417-	hsa-miR-150-3p	1	-0.166	-0.152	146	-20.58
chr5:142779221-142780417-	hsa-miR-152-5p	1		-0.033	146	-17.24
chr3:149563798-149639014+	hsa-miR-16-2-3p	1			146	-19.91
chr11:33307959-33309057+	hsa-miR-183-3p	1	-0.095	-0.244	146	-11.96
chr3:149563798-149639014+	hsa-miR-195-3p	1			146	-20.37
chr18:56363598-56367823+	hsa-miR-196a-3p	1	-0.153	-0.14	146	-23.52
chr3:149563798-149639014+	hsa-miR-196a-5p	1	-0.412	-0.437	146	-14.66
chr11:33307959-33309057+	hsa-miR-199a-5p	1			146	-21.61
chr2:32142995-32157204-	hsa-miR-200b-3p	1	-0.127	-0.227	146	-9.48
chr10:7839010-7844817+	hsa-miR-208a-5p	1	-0.142	-0.261	146	-11.12
chr3:149563798-149639014+	hsa-miR-20b-5p	1	-0.095	-0.174	146	-10.11
chr11:33307959-33309057+	hsa-miR-212-3p	1	-0.217	-0.268	146	-14.3
chr11:33307959-33309057+	hsa-miR-298	1			146	-18.63
chr11:33307959-33309057+	hsa-miR-301a-3p	1			146	-16.92
chr5:142779221-142780417-	hsa-miR-3148	1		-0.059	146	-17.43
chr5:142779221-142780417-	hsa-miR-3173-5p	1	-0.227	-0.155	146	-19.31
chr3:71064700-71102924-	hsa-miR-3182	1	-0.077	-0.114	146	-19.74
chr5:142779221-142780417-	hsa-miR-3187-5p	1			146	-29.6
chr3:157839892-157841780+	hsa-miR-3193	1	-0.287	-0.182	146	-21.16
chr14:99924616-99932150-	hsa-miR-3195	1	-0.347	-0.117	146	-19.26
chr5:142779221-142780417-	hsa-miR-342-5p	1	-0.256	-0.188	146	-20.79
chr11:33307959-33309057+	hsa-miR-3529-3p	1			146	-15.04
chr3:157839892-157841780+	hsa-miR-3653-3p	1	-0.079	-0.206	146	-12.73
chr11:33307959-33309057+	hsa-miR-3668	1		-0.064	146	-11.78
chr11:33307959-33309057+	hsa-miR-3687	1			146	-28.65
chr8:48308936-48320523+	hsa-miR-374c-3p	1	-0.181	-0.196	146	-10.93
chr14:99924616-99932150-	hsa-miR-378g	1		-0.004	146	-20.64
chr3:149563798-149639014+	hsa-miR-3916	1			146	-21.77
chr5:142779221-142780417-	hsa-miR-3919	1	-0.063	-0.117	146	-14.28
chr10:7839010-7844817+	hsa-miR-3944-3p	1			146	-25.67
chr14:99924616-99932150-	hsa-miR-3974	1			146	-13.89
chr5:142779221-142780417-	hsa-miR-4260	1	-0.216	-0.179	146	-19.69
chr3:71064700-71102924-	hsa-miR-4433b-3p	1		-0.03	146	-23.59
chr10:7839010-7844817+	hsa-miR-4439	1	-0.079	-0.084	146	-14.32
chr3:71064700-71102924-	hsa-miR-4443	1			146	-21.33
chr14:99924616-99932150-	hsa-miR-4445-3p	1			146	-17.59
chr18:56363598-56367823+	hsa-miR-4452	1	-0.089	-0.179	146	-11.79
chr10:7839010-7844817+	hsa-miR-4487	1	-0.27	-0.257	146	-14.93
chr3:71064700-71102924-	hsa-miR-4491	1		-0.002	146	-21.16
chrX:79962926-79975155-	hsa-miR-4529-5p	1	-0.411	-0.284	146	-15.16
chr10:7839010-7844817+	hsa-miR-4662b	1	-0.106	-0.162	146	-11.58
chr3:71064700-71102924-	hsa-miR-4667-5p	1	-0.217	-0.183	146	-20.08
chr11:33307959-33309057+	hsa-miR-4676-3p	1		0.004	146	-21.52
chr5:142779221-142780417-	hsa-miR-4681	1	-0.283	-0.204	146	-17
chrX:79962926-79975155-	hsa-miR-4682	1	-0.117	-0.093	146	-28.45
chr5:142779221-142780417-	hsa-miR-4684-5p	1	-0.269	-0.304	146	-9.37
chr5:142779221-142780417-	hsa-miR-4689	1			146	-26.36
chr3:71064700-71102924-	hsa-miR-4690-5p	1		0.015	146	-32.9
chr5:167915607-167921655+	hsa-miR-4691-3p	1	-0.267	-0.239	146	-18.42
chr5:142779221-142780417-	hsa-miR-4691-5p	1	-0.133	-0.113	146	-23.06
chrX:79962926-79975155-	hsa-miR-4700-5p	1		-0.053	146	-19.42
chr3:71064700-71102924-	hsa-miR-4701-5p	1	-0.235	-0.192	146	-19.6
chr3:71064700-71102924-	hsa-miR-4722-5p	1		-0.005	146	-30.59
chr3:71064700-71102924-	hsa-miR-4735-3p	1	-0.188	-0.172	146	-15.87
chr10:7839010-7844817+	hsa-miR-4738-3p	1	-0.043	-0.117	146	-17.97
chr3:71064700-71102924-	hsa-miR-4755-5p	1	-0.255	-0.331	146	-17.39
chr14:99924616-99932150-	hsa-miR-4766-3p	1	-0.234	-0.398	146	-11.73
chr3:157839892-157841780+	hsa-miR-4780	1	-0.171	-0.136	146	-15.9
chr3:71064700-71102924-	hsa-miR-4786-3p	1		-0.024	146	-23.8
chr11:33307959-33309057+	hsa-miR-485-3p	1	-0.147	-0.213	146	-12.93
chr11:33307959-33309057+	hsa-miR-486-5p	1			146	-23.28
chr14:99924616-99932150-	hsa-miR-5007-5p	1		-0.004	146	-24.91
chr2:32142995-32157204-	hsa-miR-5011-5p	1	-0.024	-0.294	146	-12.67
chr5:142779221-142780417-	hsa-miR-505-3p	1		-0.019	146	-20.76
chr5:142779221-142780417-	hsa-miR-5087	1		-0.029	146	-16.99
chr5:142779221-142780417-	hsa-miR-5088-3p	1			146	-27.07
chr5:142779221-142780417-	hsa-miR-511-5p	1			146	-20.55
chr3:149563798-149639014+	hsa-miR-516b-5p	1	-0.141	-0.155	146	-17.13
chr11:33307959-33309057+	hsa-miR-5187-5p	1		-0.03	146	-17.61
chr10:7839010-7844817+	hsa-miR-5187-5p	1			146	-18.2
chr3:149563798-149639014+	hsa-miR-518a-5p	1	-0.13	-0.192	146	-11.9
chr3:71064700-71102924-	hsa-miR-520a-5p	1	-0.266	-0.269	146	-15.69
chr11:33307959-33309057+	hsa-miR-522-3p	1	-0.242	-0.424	146	-9.97
chr8:48308936-48320523+	hsa-miR-524-5p	1		-0.048	146	-23.18
chr5:142779221-142780417-	hsa-miR-526b-5p	1			146	-25.72
chr3:149563798-149639014+	hsa-miR-527	1	-0.13	-0.192	146	-11.9
chr2:32142995-32157204-	hsa-miR-539-3p	1	-0.078	-0.124	146	-11.81
chr2:32142995-32157204-	hsa-miR-543	1	-0.034	-0.13	146	-12.04
chr5:167915607-167921655+	hsa-miR-548ap-3p	1	-0.16	-0.352	146	-6.47
chr14:99924616-99932150-	hsa-miR-548ap-5p	1	-0.015	-0.167	146	-11.02
chr3:149563798-149639014+	hsa-miR-548h-3p	1	-0.036	-0.182	146	-8.96
chr5:167915607-167921655+	hsa-miR-548u	1		-0.035	146	-14.37
chr3:149563798-149639014+	hsa-miR-548z	1	-0.036	-0.182	146	-8.96
chr10:7839010-7844817+	hsa-miR-5588-5p	1	-0.181	-0.169	146	-17.13
chr3:149563798-149639014+	hsa-miR-5694	1		-0.056	146	-17.56
chr5:167915607-167921655+	hsa-miR-5703	1	-0.329	-0.372	146	-12.23
chr3:149563798-149639014+	hsa-miR-576-5p	1	-0.1	-0.289	146	-12.22
chr14:99924616-99932150-	hsa-miR-578	1		-0.034	146	-17.22
chr3:157839892-157841780+	hsa-miR-609	1		-0.039	146	-18.93
chr10:7839010-7844817+	hsa-miR-6131	1		-0.047	146	-24.17
chr3:157839892-157841780+	hsa-miR-618	1	-0.171	-0.252	146	-16.61
chr14:99924616-99932150-	hsa-miR-627-3p	1			146	-16.6
chr3:71064700-71102924-	hsa-miR-642a-3p	1	-0.056	-0.074	146	-16.52
chr11:33307959-33309057+	hsa-miR-642a-5p	1	-0.2	-0.211	146	-17.91
chr3:71064700-71102924-	hsa-miR-642b-3p	1	-0.056	-0.074	146	-16.52
chr5:167915607-167921655+	hsa-miR-6501-3p	1	-0.146	-0.138	146	-20.22
chr18:56363598-56367823+	hsa-miR-6504-5p	1	-0.255	-0.248	146	-16.05
chr11:33307959-33309057+	hsa-miR-6505-5p	1	-0.067	-0.121	146	-12.31
chr5:167915607-167921655+	hsa-miR-6507-5p	1	-0.087	-0.245	146	-14.74
chr3:71064700-71102924-	hsa-miR-6514-3p	1	-0.285	-0.261	146	-14.99
chr5:142779221-142780417-	hsa-miR-6516-5p	1	-0.021	-0.061	146	-18.42
chr14:99924616-99932150-	hsa-miR-6733-3p	1			146	-20.74
chr10:7839010-7844817+	hsa-miR-6743-5p	1			146	-21.57
chr3:149563798-149639014+	hsa-miR-6754-5p	1	-0.18	-0.161	146	-17.34
chr8:48308936-48320523+	hsa-miR-6759-5p	1	-0.223	-0.204	146	-16.88
chr2:32142995-32157204-	hsa-miR-676-3p	1	-0.21	-0.228	146	-9.95
chr3:149563798-149639014+	hsa-miR-6780b-3p	1		-0.019	146	-16.79
chr3:71064700-71102924-	hsa-miR-6790-5p	1		-0.001	146	-24.95
chr5:142779221-142780417-	hsa-miR-6813-3p	1		-0.033	146	-21.27
chr14:99924616-99932150-	hsa-miR-6834-5p	1			146	-17.73
chr3:71064700-71102924-	hsa-miR-6847-5p	1	-0.095	-0.094	146	-18.37
chr3:71064700-71102924-	hsa-miR-6857-3p	1	-0.186	-0.196	146	-15.11
chr10:7839010-7844817+	hsa-miR-6869-5p	1			146	-23.51
chr3:71064700-71102924-	hsa-miR-6879-5p	1	-0.095	-0.055	146	-23.91
chr5:142779221-142780417-	hsa-miR-6889-3p	1	-0.208	-0.186	146	-17.21
chr5:167915607-167921655+	hsa-miR-6894-5p	1	-0.216	-0.235	146	-22.14
chr5:142779221-142780417-	hsa-miR-7107-3p	1	-0.248	-0.254	146	-17.78
chr11:33307959-33309057+	hsa-miR-7109-5p	1			146	-19.85
chrX:79962926-79975155-	hsa-miR-7110-3p	1		-0.041	146	-25.07
chr3:149563798-149639014+	hsa-miR-7154-5p	1	-0.163	-0.249	146	-11.36
chrX:79962926-79975155-	hsa-miR-7159-5p	1	-0.157	-0.285	146	-14.69
chr11:33307959-33309057+	hsa-miR-7162-3p	1	-0.208	-0.176	146	-19.29
chr3:149563798-149639014+	hsa-miR-764	1			146	-21.95
chr5:142779221-142780417-	hsa-miR-7641	1	-0.076	-0.115	146	-15.88
chr5:142779221-142780417-	hsa-miR-765	1		-0.01	146	-18.71
chrX:79962926-79975155-	hsa-miR-7850-5p	1	-0.141	-0.186	146	-13.42
chr10:7839010-7844817+	hsa-miR-8062	1			146	-11.35
chr14:99924616-99932150-	hsa-miR-8079	1			146	-14.14
chr5:167915607-167921655+	hsa-miR-8087	1			146	-22.52
chr14:99924616-99932150-	hsa-miR-876-5p	1		-0.038	146	-14.88
chr5:142779221-142780417-	hsa-miR-892a	1		-0.023	146	-19.07
chr11:33307959-33309057+	hsa-miR-892c-5p	1		-0.063	146	-14.83
chr14:99924616-99932150-	hsa-miR-99a-5p	1			146	-21.1
chr14:99924616-99932150-	hsa-miR-99b-5p	1			146	-15.45
chrX:79962926-79975155-	hsa-miR-122-3p	1	-0.183	-0.085	145	-11.69
chr11:33307959-33309057+	hsa-miR-1233-5p	1	-0.214	-0.18	145	-20.97
chr2:61749746-61753656-	hsa-miR-1236-3p	1		-0.065	145	-17.37
chr11:33307959-33309057+	hsa-miR-1255a	1	-0.267	-0.301	145	-16.62
chr11:33307959-33309057+	hsa-miR-1255b-5p	1	-0.267	-0.301	145	-13.73
chr5:142779221-142780417-	hsa-miR-1264	1	-0.05	-0.121	145	-10.24
chr5:167915607-167921655+	hsa-miR-1273h-5p	1	-0.236	-0.222	145	-21.27
chr3:149563798-149639014+	hsa-miR-1276	1	-0.123	-0.17	145	-15.06
chr10:7839010-7844817+	hsa-miR-142-5p	1	-0.047	-0.305	145	-8.57
chrX:79962926-79975155-	hsa-miR-146a-3p	1	-0.112	-0.16	145	-17.93
chr3:157839892-157841780+	hsa-miR-146a-3p	1	-0.104	-0.142	145	-16.17
chr14:99924616-99932150-	hsa-miR-147a	1	-0.364	-0.378	145	-14.41
chrX:79962926-79975155-	hsa-miR-151a-5p	1	-0.216	-0.119	145	-17.39
chrX:79962926-79975155-	hsa-miR-151b	1	-0.216	-0.119	145	-17.39
chr5:142779221-142780417-	hsa-miR-18a-5p	1	-0.198	-0.211	145	-14.43
chr3:71064700-71102924-	hsa-miR-18b-5p	1	-0.16	-0.125	145	-12.73
chrX:79962926-79975155-	hsa-miR-205-5p	1	-0.314	-0.437	145	-18
chr3:149563798-149639014+	hsa-miR-2053	1		-0.041	145	-11.52
chr3:71064700-71102924-	hsa-miR-219a-2-3p	1	-0.059	-0.126	145	-11.87
chr5:142779221-142780417-	hsa-miR-219b-3p	1			145	-20.38
chr14:99924616-99932150-	hsa-miR-2909	1	-0.172	-0.137	145	-16.4
chr10:7839010-7844817+	hsa-miR-29a-5p	1	-0.125	-0.315	145	-9.5
chr10:7839010-7844817+	hsa-miR-29b-2-5p	1	-0.091	-0.134	145	-20.24
chr18:56363598-56367823+	hsa-miR-3064-5p	1	-0.255	-0.248	145	-18.7
chr10:7839010-7844817+	hsa-miR-30a-3p	1			145	-13.96
chr10:7839010-7844817+	hsa-miR-30e-3p	1			145	-11.1
chrX:79962926-79975155-	hsa-miR-3147	1			145	-25.64
chr11:33307959-33309057+	hsa-miR-3167	1	-0.123	-0.207	145	-13.7
chr3:149563798-149639014+	hsa-miR-3173-3p	1			145	-16.46
chr2:32142995-32157204-	hsa-miR-3184-5p	1	-0.285	-0.212	145	-20
chr11:33307959-33309057+	hsa-miR-3191-5p	1	-0.33	-0.372	145	-13.79
chr8:48308936-48320523+	hsa-miR-335-3p	1	-0.015	-0.15	145	-12.77
chr11:33307959-33309057+	hsa-miR-3653-3p	1	-0.007	-0.126	145	-8.01
chrX:79962926-79975155-	hsa-miR-365a-5p	1		-0.045	145	-21.65
chr11:33307959-33309057+	hsa-miR-3677-5p	1	-0.251	-0.175	145	-18.94
chrX:79962926-79975155-	hsa-miR-3677-5p	1	-0.234	-0.163	145	-24.32
chr3:71064700-71102924-	hsa-miR-3688-3p	1		-0.055	145	-19.18
chr5:167915607-167921655+	hsa-miR-3689d	1	-0.254	-0.229	145	-18.75
chr14:99924616-99932150-	hsa-miR-371a-5p	1	-0.116	-0.27	145	-13.53
chr14:99924616-99932150-	hsa-miR-377-3p	1	-0.068	-0.103	145	-10.89
chr11:33307959-33309057+	hsa-miR-378j	1	-0.078	-0.124	145	-14.61
chr10:7839010-7844817+	hsa-miR-383-3p	1	-0.321	-0.322	145	-17.55
chr14:99924616-99932150-	hsa-miR-3913-3p	1	-0.213	-0.242	145	-11.44
chr3:157839892-157841780+	hsa-miR-3921	1		-0.042	145	-12
chr10:7839010-7844817+	hsa-miR-3941	1		-0.014	145	-14.55
chr3:149563798-149639014+	hsa-miR-3976	1			145	-13.91
chr5:167915607-167921655+	hsa-miR-4251	1	-0.252	-0.394	145	-14.28
chr2:32142995-32157204-	hsa-miR-4257	1	-0.173	-0.177	145	-17.27
chrX:79962926-79975155-	hsa-miR-4273	1	-0.26	-0.338	145	-15.36
chr3:71064700-71102924-	hsa-miR-4277	1	-0.053	-0.091	145	-16.04
chr3:149563798-149639014+	hsa-miR-4288	1	-0.272	-0.265	145	-12.33
chr3:149563798-149639014+	hsa-miR-4289	1	-0.175	-0.264	145	-12.12
chr5:142779221-142780417-	hsa-miR-4317	1	-0.129	-0.128	145	-15.13
chr14:99924616-99932150-	hsa-miR-4330	1			145	-24.91
chr10:7839010-7844817+	hsa-miR-4435	1	-0.428	-0.414	145	-16.52
chr3:71064700-71102924-	hsa-miR-4436b-3p	1	-0.077	-0.024	145	-21.5
chr3:71064700-71102924-	hsa-miR-4437	1	-0.163	-0.084	145	-17.27
chr5:142779221-142780417-	hsa-miR-4464	1	-0.117	-0.191	145	-13.64
chr14:99924616-99932150-	hsa-miR-4498	1	-0.194	-0.125	145	-19.9
chr3:149563798-149639014+	hsa-miR-449c-5p	1	-0.231	-0.214	145	-16.22
chr3:149563798-149639014+	hsa-miR-4502	1	-0.179	-0.226	145	-17.6
chr10:7839010-7844817+	hsa-miR-4513	1	-0.257	-0.245	145	-18.7
chr3:71064700-71102924-	hsa-miR-451b	1	-0.04	-0.058	145	-11.36
chr11:33307959-33309057+	hsa-miR-4527	1		-0.06	145	-16.55
chr8:48308936-48320523+	hsa-miR-455-3p	1	-0.234	-0.221	145	-16.13
chr10:7839010-7844817+	hsa-miR-4650-5p	1	-0.194	-0.108	145	-19.86
chr3:149563798-149639014+	hsa-miR-4656	1		-0.022	145	-24.77
chrX:79962926-79975155-	hsa-miR-4659a-3p	1	-0.19	-0.434	145	-12.56
chrX:79962926-79975155-	hsa-miR-4659b-3p	1	-0.19	-0.434	145	-12.56
chrX:79962926-79975155-	hsa-miR-4661-3p	1	-0.248	-0.198	145	-20.21
chr11:33307959-33309057+	hsa-miR-4666b	1			145	-16.92
chr14:99924616-99932150-	hsa-miR-4667-5p	1	-0.174	-0.131	145	-20.09
chr10:7839010-7844817+	hsa-miR-4668-5p	1	-0.098	-0.194	145	-12.83
chr5:142779221-142780417-	hsa-miR-4688	1		0.008	145	-24.94
chr2:61749746-61753656-	hsa-miR-4711-5p	1	-0.188	-0.169	145	-14.19
chr14:99924616-99932150-	hsa-miR-4711-5p	1			145	-28.34
chr11:33307959-33309057+	hsa-miR-4718	1	-0.34	-0.37	145	-16.2
chr5:167915607-167921655+	hsa-miR-4733-3p	1		-0.084	145	-18.31
chr5:142779221-142780417-	hsa-miR-4735-3p	1	-0.18	-0.18	145	-13.06
chr5:142779221-142780417-	hsa-miR-4742-3p	1	-0.047	-0.125	145	-10.37
chr3:157839892-157841780+	hsa-miR-4768-5p	1			145	-21.47
chr5:142779221-142780417-	hsa-miR-4769-5p	1			145	-22.14
chr5:142779221-142780417-	hsa-miR-4776-3p	1		0.006	145	-22.03
chrX:79962926-79975155-	hsa-miR-4781-3p	1	-0.247	-0.327	145	-13.08
chr5:167915607-167921655+	hsa-miR-4795-5p	1		-0.083	145	-10.33
chr10:7839010-7844817+	hsa-miR-4802-5p	1	-0.229	-0.234	145	-19.24
chr11:33307959-33309057+	hsa-miR-487b-5p	1			145	-19.08
chr3:71064700-71102924-	hsa-miR-494-5p	1			145	-19.36
chr10:7839010-7844817+	hsa-miR-5002-5p	1			145	-11.62
chr3:71064700-71102924-	hsa-miR-5006-3p	1	-0.234	-0.327	145	-15.21
chr3:71064700-71102924-	hsa-miR-518a-5p	1	-0.006	-0.059	145	-14.87
chr5:142779221-142780417-	hsa-miR-5193	1	-0.397	-0.378	145	-17.55
chr3:149563798-149639014+	hsa-miR-519d-3p	1	-0.077	-0.143	145	-11.37
chr3:71064700-71102924-	hsa-miR-527	1	-0.006	-0.059	145	-14.87
chr11:33307959-33309057+	hsa-miR-548ad-3p	1			145	-10.77
chr5:142779221-142780417-	hsa-miR-548am-5p	1			145	-11.96
chr8:48308936-48320523+	hsa-miR-548ar-3p	1		-0.007	145	-13.25
chr14:99924616-99932150-	hsa-miR-548as-3p	1	-0.08	-0.144	145	-12.29
chr5:142779221-142780417-	hsa-miR-548az-3p	1	-0.114	-0.265	145	-8.56
chr5:142779221-142780417-	hsa-miR-548bb-5p	1			145	-8.57
chr5:142779221-142780417-	hsa-miR-548c-5p	1			145	-11.96
chr5:142779221-142780417-	hsa-miR-548e-5p	1		-0.013	145	-13.33
chr5:142779221-142780417-	hsa-miR-548f-3p	1	-0.086	-0.218	145	-8.98
chr5:142779221-142780417-	hsa-miR-548h-5p	1			145	-13.75
chr5:142779221-142780417-	hsa-miR-548o-5p	1			145	-11.96
chr5:142779221-142780417-	hsa-miR-548w	1			145	-14.08
chr5:142779221-142780417-	hsa-miR-548y	1			145	-9.06
chr5:142779221-142780417-	hsa-miR-5572	1	-0.125	-0.117	145	-20.62
chr10:7839010-7844817+	hsa-miR-5590-3p	1	-0.068	-0.309	145	-9.16
chrX:79962926-79975155-	hsa-miR-568	1	-0.072	-0.196	145	-5.99
chr5:142779221-142780417-	hsa-miR-575	1	-0.13	-0.093	145	-16.96
chr14:99924616-99932150-	hsa-miR-582-5p	1		-0.013	145	-21.82
chr18:56363598-56367823+	hsa-miR-586	1			145	-17.23
chr5:167915607-167921655+	hsa-miR-590-3p	1	-0.047	-0.498	145	-4.38
chr3:71064700-71102924-	hsa-miR-6071	1	-0.131	-0.117	145	-15.39
chr11:33307959-33309057+	hsa-miR-6074	1	-0.109	-0.362	145	-9.63
chr14:99924616-99932150-	hsa-miR-6129	1			145	-21.29
chr3:157839892-157841780+	hsa-miR-625-3p	1		-0.037	145	-14.55
chr5:142779221-142780417-	hsa-miR-627-5p	1			145	-12.37
chr3:149563798-149639014+	hsa-miR-644a	1	-0.433	-0.366	145	-15.82
chr14:99924616-99932150-	hsa-miR-655-5p	1			145	-12.34
chr14:99924616-99932150-	hsa-miR-656-5p	1			145	-20.28
chr11:33307959-33309057+	hsa-miR-661	1			145	-26.03
chr18:56363598-56367823+	hsa-miR-6720-5p	1	-0.237	-0.191	145	-20.98
chr11:33307959-33309057+	hsa-miR-6732-3p	1	-0.4	-0.413	145	-16.62
chr3:149563798-149639014+	hsa-miR-6733-3p	1			145	-20.48
chr14:99924616-99932150-	hsa-miR-6734-3p	1		-0.033	145	-20.52
chr2:32142995-32157204-	hsa-miR-6734-5p	1		-0.027	145	-22.71
chr2:32142995-32157204-	hsa-miR-6738-5p	1		-0.023	145	-20.82
chr5:167915607-167921655+	hsa-miR-6739-3p	1	-0.114	-0.193	145	-14.37
chr14:99924616-99932150-	hsa-miR-6740-3p	1		-0.057	145	-15.85
chr10:7839010-7844817+	hsa-miR-6769a-5p	1			145	-25.74
chr11:33307959-33309057+	hsa-miR-6781-3p	1		-0.038	145	-20.43
chr5:167915607-167921655+	hsa-miR-6797-3p	1	-0.366	-0.357	145	-21.73
chr3:71064700-71102924-	hsa-miR-6801-5p	1	-0.311	-0.288	145	-19.02
chr11:33307959-33309057+	hsa-miR-6804-3p	1	-0.201	-0.156	145	-13.57
chr3:157839892-157841780+	hsa-miR-6846-3p	1	-0.253	-0.163	145	-17.75
chr10:7839010-7844817+	hsa-miR-6847-3p	1		-0.036	145	-16.97
chr8:48308936-48320523+	hsa-miR-6848-3p	1	-0.23	-0.23	145	-15.39
chr3:157839892-157841780+	hsa-miR-6854-3p	1		-0.029	145	-18.2
chr3:71064700-71102924-	hsa-miR-6861-5p	1	-0.093	-0.061	145	-18.59
chr11:33307959-33309057+	hsa-miR-6877-5p	1	-0.611	-0.417	145	-20.83
chr5:142779221-142780417-	hsa-miR-6892-3p	1	-0.17	-0.119	145	-21.29
chr10:7839010-7844817+	hsa-miR-6892-5p	1	-0.34	-0.389	145	-16.21
chr2:32142995-32157204-	hsa-miR-7155-3p	1	-0.214	-0.143	145	-15.63
chr18:56363598-56367823+	hsa-miR-7158-3p	1			145	-12.97
chrX:79962926-79975155-	hsa-miR-7161-5p	1	-0.181	-0.365	145	-12.47
chrX:79962926-79975155-	hsa-miR-767-5p	1	-0.234	-0.219	145	-15.92
chr5:167915607-167921655+	hsa-miR-7844-5p	1			145	-16.38
chr3:157839892-157841780+	hsa-miR-7974	1		-0.058	145	-17.49
chr3:71064700-71102924-	hsa-miR-8064	1	-0.159	-0.126	145	-19.02
chr5:142779221-142780417-	hsa-miR-8064	1	-0.137	-0.1	145	-18.61
chr3:71064700-71102924-	hsa-miR-8069	1			145	-30.48
chr10:7839010-7844817+	hsa-miR-8071	1	-0.407	-0.316	145	-16.87
chr3:71064700-71102924-	hsa-miR-877-5p	1		0.009	145	-26.64
chr5:142779221-142780417-	hsa-miR-877-5p	1		0.02	145	-21.21
chr10:7839010-7844817+	hsa-miR-924	1			145	-17.08
chr11:33307959-33309057+	hsa-miR-924	1			145	-16.77
chr2:61749746-61753656-	hsa-miR-103a-2-5p	1			144	-14.57
chr11:33307959-33309057+	hsa-miR-1226-3p	1			144	-18.69
chr14:99924616-99932150-	hsa-miR-1226-5p	1			144	-21.85
chr5:142779221-142780417-	hsa-miR-1233-5p	1	-0.101	-0.014	144	-24.26
chr3:149563798-149639014+	hsa-miR-1250-3p	1	-0.089	-0.262	144	-6.63
chr5:142779221-142780417-	hsa-miR-1252-5p	1			144	-14.99
chr18:56363598-56367823+	hsa-miR-1265	1	-0.165	-0.168	144	-14.29
chrX:79962926-79975155-	hsa-miR-1266-3p	1			144	-27.41
chr11:33307959-33309057+	hsa-miR-1273h-5p	1	-0.238	-0.229	144	-15.16
chr5:142779221-142780417-	hsa-miR-1289	1			144	-20
chrX:79962926-79975155-	hsa-miR-130b-5p	1	-0.136	-0.279	144	-11.34
chr8:48308936-48320523+	hsa-miR-136-5p	1		-0.037	144	-16.14
chr18:56363598-56367823+	hsa-miR-181b-2-3p	1		-0.073	144	-13.33
chr3:149563798-149639014+	hsa-miR-1827	1		-0.054	144	-14.92
chr5:142779221-142780417-	hsa-miR-185-5p	1			144	-18
chr3:157839892-157841780+	hsa-miR-192-5p	1	-0.352	-0.336	144	-13.67
chr14:99924616-99932150-	hsa-miR-199b-5p	1	-0.056	-0.023	144	-18.21
chr8:48308936-48320523+	hsa-miR-19a-5p	1			144	-15.65
chr2:32142995-32157204-	hsa-miR-202-5p	1		-0.041	144	-12.44
chr11:33307959-33309057+	hsa-miR-2053	1			144	-12.39
chr11:33307959-33309057+	hsa-miR-20a-3p	1	-0.15	-0.227	144	-12.87
chr14:99924616-99932150-	hsa-miR-2115-3p	1			144	-16.64
chr14:99924616-99932150-	hsa-miR-212-3p	1	-0.175	-0.234	144	-11.98
chr3:157839892-157841780+	hsa-miR-215-5p	1	-0.352	-0.336	144	-13.8
chr5:167915607-167921655+	hsa-miR-2355-3p	1			144	-24.45
chr5:167915607-167921655+	hsa-miR-2467-3p	1	-0.194	-0.182	144	-21.31
chr3:149563798-149639014+	hsa-miR-28-5p	1			144	-18.69
chr14:99924616-99932150-	hsa-miR-29b-3p	1	-0.368	-0.284	144	-16.4
chrX:79962926-79975155-	hsa-miR-3119	1	-0.283	-0.422	144	-11.42
chr5:142779221-142780417-	hsa-miR-3126-3p	1	-0.16	-0.123	144	-11.34
chr3:149563798-149639014+	hsa-miR-3138	1		-0.015	144	-21.42
chrX:79962926-79975155-	hsa-miR-3145-3p	1			144	-17.35
chr3:149563798-149639014+	hsa-miR-3149	1			144	-11.35
chr3:149563798-149639014+	hsa-miR-3154	1		-0.063	144	-23.88
chr2:32142995-32157204-	hsa-miR-3187-5p	1		-0.024	144	-24.95
chr8:48308936-48320523+	hsa-miR-3189-3p	1	-0.147	-0.116	144	-20.42
chr3:71064700-71102924-	hsa-miR-3190-3p	1		-0.007	144	-21.86
chr3:149563798-149639014+	hsa-miR-3192-5p	1			144	-18.85
chr5:142779221-142780417-	hsa-miR-328-5p	1		-0.009	144	-31.14
chr10:7839010-7844817+	hsa-miR-338-3p	1	-0.053	-0.027	144	-17.5
chrX:79962926-79975155-	hsa-miR-33a-5p	1	-0.032	-0.033	144	-16.05
chrX:79962926-79975155-	hsa-miR-33b-5p	1	-0.032	-0.033	144	-14.23
chr10:7839010-7844817+	hsa-miR-3529-5p	1			144	-19.28
chr5:142779221-142780417-	hsa-miR-3591-5p	1	-0.112	-0.196	144	-12.62
chr14:99924616-99932150-	hsa-miR-3617-5p	1	-0.075	-0.153	144	-11.16
chr3:149563798-149639014+	hsa-miR-3658	1	-0.07	-0.319	144	-10.71
chr5:142779221-142780417-	hsa-miR-3661	1		-0.011	144	-25.58
chr3:157839892-157841780+	hsa-miR-3661	1			144	-25.61
chr14:99924616-99932150-	hsa-miR-3667-5p	1			144	-18.52
chr5:142779221-142780417-	hsa-miR-3679-5p	1			144	-22.92
chr10:7839010-7844817+	hsa-miR-3681-5p	1			144	-18.88
chr11:33307959-33309057+	hsa-miR-3686	1			144	-13.09
chr3:71064700-71102924-	hsa-miR-3714	1			144	-19.5
chrX:79962926-79975155-	hsa-miR-378g	1			144	-17.95
chrX:79962926-79975155-	hsa-miR-3921	1			144	-14.37
chr2:32142995-32157204-	hsa-miR-3924	1			144	-10.31
chr11:33307959-33309057+	hsa-miR-3974	1			144	-12.1
chr3:71064700-71102924-	hsa-miR-3977	1	-0.08	-0.078	144	-11.99
chr11:33307959-33309057+	hsa-miR-3978	1			144	-21.45
chr3:71064700-71102924-	hsa-miR-3978	1			144	-17.87
chr14:99924616-99932150-	hsa-miR-4295	1			144	-22.67
chr5:167915607-167921655+	hsa-miR-4305	1			144	-20.23
chr5:142779221-142780417-	hsa-miR-431-3p	1			144	-20.23
chr5:167915607-167921655+	hsa-miR-4328	1	-0.043	-0.149	144	-10.56
chr10:7839010-7844817+	hsa-miR-4426	1	-0.078	-0.116	144	-10.38
chr3:71064700-71102924-	hsa-miR-4451	1	-0.338	-0.283	144	-16.53
chr5:142779221-142780417-	hsa-miR-4476	1			144	-22.32
chr5:142779221-142780417-	hsa-miR-4478	1	-0.147	-0.151	144	-14.54
chr8:48308936-48320523+	hsa-miR-450a-1-3p	1		-0.017	144	-15.38
chr5:142779221-142780417-	hsa-miR-450a-1-3p	1			144	-13.18
chr3:71064700-71102924-	hsa-miR-4512	1	-0.193	-0.105	144	-17.21
chr2:32142995-32157204-	hsa-miR-452-3p	1	-0.288	-0.368	144	-15.95
chr3:71064700-71102924-	hsa-miR-4525	1			144	-26.71
chr10:7839010-7844817+	hsa-miR-4636	1			144	-17.41
chrX:79962926-79975155-	hsa-miR-4639-5p	1			144	-16.28
chr5:142779221-142780417-	hsa-miR-4655-5p	1			144	-26.02
chr3:149563798-149639014+	hsa-miR-4659a-3p	1	-0.218	-0.377	144	-12.16
chr14:99924616-99932150-	hsa-miR-4659a-3p	1	-0.044	-0.168	144	-8.42
chr14:99924616-99932150-	hsa-miR-4659b-3p	1	-0.044	-0.168	144	-8.78
chr3:71064700-71102924-	hsa-miR-4679	1	-0.118	-0.165	144	-10.88
chr5:167915607-167921655+	hsa-miR-4685-5p	1			144	-26.01
chr5:142779221-142780417-	hsa-miR-4697-5p	1	-0.191	-0.03	144	-27.92
chr14:99924616-99932150-	hsa-miR-4700-5p	1	-0.192	-0.162	144	-19.38
chr3:71064700-71102924-	hsa-miR-4709-3p	1			144	-22.15
chr11:33307959-33309057+	hsa-miR-4716-5p	1	-0.052	-0.113	144	-10.33
chr5:142779221-142780417-	hsa-miR-4726-3p	1	-0.337	-0.293	144	-20.86
chr3:71064700-71102924-	hsa-miR-4728-5p	1			144	-27.01
chrX:79962926-79975155-	hsa-miR-4747-5p	1		-0.048	144	-20.9
chr3:157839892-157841780+	hsa-miR-4751	1	-0.22	-0.152	144	-18.05
chr11:33307959-33309057+	hsa-miR-4753-3p	1		-0.015	144	-13.82
chr3:157839892-157841780+	hsa-miR-4778-3p	1			144	-19.66
chr10:7839010-7844817+	hsa-miR-4790-5p	1	-0.199	-0.166	144	-12.52
chr11:33307959-33309057+	hsa-miR-487b-3p	1		-0.045	144	-15.16
chr14:99924616-99932150-	hsa-miR-5006-5p	1		-0.009	144	-23.94
chr11:33307959-33309057+	hsa-miR-5007-5p	1			144	-20.92
chr5:142779221-142780417-	hsa-miR-500a-5p	1		-0.005	144	-20.16
chr8:48308936-48320523+	hsa-miR-516b-5p	1	-0.358	-0.386	144	-16.26
chr3:149563798-149639014+	hsa-miR-5196-5p	1		-0.065	144	-24.23
chr11:33307959-33309057+	hsa-miR-519c-3p	1			144	-9.5
chr14:99924616-99932150-	hsa-miR-526b-5p	1	-0.114	-0.151	144	-12.27
chr8:48308936-48320523+	hsa-miR-539-5p	1		-0.069	144	-13.16
chr18:56363598-56367823+	hsa-miR-543	1			144	-17.32
chr2:32142995-32157204-	hsa-miR-548ag	1			144	-10.05
chr5:142779221-142780417-	hsa-miR-548ak	1			144	-11.6
chr5:142779221-142780417-	hsa-miR-548au-5p	1			144	-11.6
chr8:48308936-48320523+	hsa-miR-548aw	1	-0.086	-0.206	144	-10.58
chr3:71064700-71102924-	hsa-miR-548b-3p	1		0.011	144	-18.18
chr2:32142995-32157204-	hsa-miR-548ba	1			144	-9.92
chr14:99924616-99932150-	hsa-miR-548f-5p	1		-0.06	144	-15.5
chr5:142779221-142780417-	hsa-miR-548f-5p	1		-0.034	144	-10.58
chr8:48308936-48320523+	hsa-miR-554	1	-0.262	-0.233	144	-19.48
chr10:7839010-7844817+	hsa-miR-5584-5p	1	-0.144	-0.213	144	-15.8
chr5:142779221-142780417-	hsa-miR-5588-3p	1	-0.213	-0.184	144	-12.09
chr2:32142995-32157204-	hsa-miR-5589-3p	1	-0.152	-0.149	144	-17.33
chr5:142779221-142780417-	hsa-miR-561-3p	1			144	-11.58
chr2:32142995-32157204-	hsa-miR-568	1	-0.035	-0.138	144	-8.36
chr3:157839892-157841780+	hsa-miR-5708	1			144	-17.68
chrX:79962926-79975155-	hsa-miR-576-3p	1			144	-12.3
chr18:56363598-56367823+	hsa-miR-582-5p	1		-0.02	144	-13.79
chrX:79962926-79975155-	hsa-miR-586	1	-0.202	-0.356	144	-12.7
chr10:7839010-7844817+	hsa-miR-6074	1			144	-14.99
chr3:149563798-149639014+	hsa-miR-612	1			144	-16.39
chr14:99924616-99932150-	hsa-miR-646	1	-0.115	-0.077	144	-14.84
chr14:99924616-99932150-	hsa-miR-6499-5p	1			144	-25.64
chrX:79962926-79975155-	hsa-miR-664a-3p	1		-0.017	144	-11.8
chr14:99924616-99932150-	hsa-miR-6715b-3p	1	-0.137	-0.202	144	-20.05
chr3:71064700-71102924-	hsa-miR-6749-5p	1		-0.004	144	-29.78
chr2:32142995-32157204-	hsa-miR-6757-3p	1	-0.225	-0.24	144	-15.41
chr14:99924616-99932150-	hsa-miR-6768-5p	1		0.002	144	-24.21
chr3:71064700-71102924-	hsa-miR-6773-3p	1		-0.027	144	-20.62
chr5:142779221-142780417-	hsa-miR-6775-3p	1	-0.398	-0.264	144	-16.74
chr3:71064700-71102924-	hsa-miR-6799-5p	1			144	-26.39
chr14:99924616-99932150-	hsa-miR-6807-3p	1	-0.045	-0.003	144	-19.23
chr3:71064700-71102924-	hsa-miR-6807-3p	1			144	-30.39
chr5:142779221-142780417-	hsa-miR-6815-3p	1	-0.213	-0.226	144	-16.33
chr3:149563798-149639014+	hsa-miR-6817-3p	1	-0.169	-0.231	144	-12.19
chr10:7839010-7844817+	hsa-miR-6824-5p	1			144	-20.01
chr3:71064700-71102924-	hsa-miR-6829-5p	1			144	-24.99
chr5:142779221-142780417-	hsa-miR-6851-3p	1	-0.289	-0.231	144	-15.28
chr10:7839010-7844817+	hsa-miR-6856-5p	1		-0.034	144	-22.34
chr3:71064700-71102924-	hsa-miR-6866-5p	1	-0.201	-0.157	144	-12.49
chr8:48308936-48320523+	hsa-miR-6888-3p	1	-0.165	-0.195	144	-15.31
chr14:99924616-99932150-	hsa-miR-6888-3p	1			144	-15.61
chrX:79962926-79975155-	hsa-miR-6889-3p	1			144	-26.85
chr3:149563798-149639014+	hsa-miR-7151-3p	1	-0.192	-0.187	144	-19.6
chr11:33307959-33309057+	hsa-miR-7154-5p	1		-0.053	144	-13.8
chr11:33307959-33309057+	hsa-miR-7158-5p	1			144	-29.18
chr3:149563798-149639014+	hsa-miR-8080	1			144	-16.26
chr2:32142995-32157204-	hsa-miR-8085	1			144	-24.75
chr8:48308936-48320523+	hsa-miR-8086	1	-0.427	-0.323	144	-14.52
chr5:167915607-167921655+	hsa-miR-93-3p	1	-0.124	-0.14	144	-17.4
chr8:48308936-48320523+	hsa-miR-937-5p	1			144	-21.01
chr3:71064700-71102924-	hsa-miR-939-5p	1			144	-33.08
chr10:7839010-7844817+	hsa-miR-96-5p	1	-0.039	-0.006	144	-20.58
chr5:167915607-167921655+	hsa-let-7a-3p	1		-0.058	143	-9.06
chr14:99924616-99932150-	hsa-let-7e-5p	1			143	-19.35
chr10:7839010-7844817+	hsa-miR-1224-5p	1	-0.166	-0.14	143	-14.76
chr11:33307959-33309057+	hsa-miR-1243	1	-0.136	-0.169	143	-13.09
chr18:56363598-56367823+	hsa-miR-1252-3p	1			143	-11.88
chr10:7839010-7844817+	hsa-miR-1256	1	-0.301	-0.31	143	-11.8
chr8:48308936-48320523+	hsa-miR-1267	1	-0.32	-0.397	143	-11.53
chr5:142779221-142780417-	hsa-miR-1273e	1			143	-24.79
chrX:79962926-79975155-	hsa-miR-1275	1			143	-20.85
chr5:142779221-142780417-	hsa-miR-130b-5p	1			143	-16.41
chr8:48308936-48320523+	hsa-miR-130b-5p	1			143	-14.57
chr11:33307959-33309057+	hsa-miR-1324	1			143	-12.48
chr3:71064700-71102924-	hsa-miR-139-3p	1		-0.015	143	-22.87
chrX:79962926-79975155-	hsa-miR-142-3p	1	-0.241	-0.277	143	-11.68
chr2:61749746-61753656-	hsa-miR-142-3p	1			143	-13.45
chr5:167915607-167921655+	hsa-miR-142-3p	1			143	-8.91
chr11:33307959-33309057+	hsa-miR-15b-3p	1		0.002	143	-14.59
chr14:99924616-99932150-	hsa-miR-185-3p	1		-0.017	143	-22.23
chr5:142779221-142780417-	hsa-miR-1912	1	-0.105	-0.087	143	-12.88
chr3:71064700-71102924-	hsa-miR-198	1			143	-28.83
chr3:149563798-149639014+	hsa-miR-206	1	-0.243	-0.36	143	-13.15
chr18:56363598-56367823+	hsa-miR-216b-5p	1	-0.186	-0.273	143	-9.97
chr3:71064700-71102924-	hsa-miR-22-5p	1			143	-22.27
chr10:7839010-7844817+	hsa-miR-221-5p	1	-0.329	-0.266	143	-15.81
chr3:149563798-149639014+	hsa-miR-223-5p	1			143	-10.95
chr3:71064700-71102924-	hsa-miR-24-3p	1	-0.126	-0.077	143	-15.52
chr3:149563798-149639014+	hsa-miR-28-3p	1			143	-12.95
chr14:99924616-99932150-	hsa-miR-29a-3p	1	-0.368	-0.284	143	-17.34
chr3:149563798-149639014+	hsa-miR-29b-1-5p	1	-0.251	-0.361	143	-11.62
chr14:99924616-99932150-	hsa-miR-29c-3p	1	-0.368	-0.284	143	-15.87
chr5:167915607-167921655+	hsa-miR-30a-3p	1		-0.068	143	-15.56
chr5:167915607-167921655+	hsa-miR-30d-3p	1		-0.069	143	-15.56
chr5:167915607-167921655+	hsa-miR-30e-3p	1		-0.068	143	-15.66
chr10:7839010-7844817+	hsa-miR-3119	1	-0.098	-0.17	143	-10.99
chr10:7839010-7844817+	hsa-miR-3150a-5p	1	-0.187	-0.158	143	-17.58
chr5:142779221-142780417-	hsa-miR-3154	1			143	-20.21
chr5:142779221-142780417-	hsa-miR-3196	1			143	-24.68
chr3:71064700-71102924-	hsa-miR-323b-5p	1			143	-28.26
chr2:32142995-32157204-	hsa-miR-339-5p	1		-0.061	143	-24.73
chr3:149563798-149639014+	hsa-miR-361-5p	1		-0.026	143	-18.78
chrX:79962926-79975155-	hsa-miR-3622b-3p	1	-0.229	-0.223	143	-17.05
chr10:7839010-7844817+	hsa-miR-373-5p	1			143	-27.13
chr3:71064700-71102924-	hsa-miR-378g	1			143	-25.9
chr3:71064700-71102924-	hsa-miR-383-3p	1	-0.29	-0.273	143	-17.25
chr3:71064700-71102924-	hsa-miR-3929	1		0.021	143	-19.66
chr2:32142995-32157204-	hsa-miR-4277	1	-0.087	-0.117	143	-11.81
chr11:33307959-33309057+	hsa-miR-4288	1	-0.384	-0.391	143	-13.53
chr18:56363598-56367823+	hsa-miR-4314	1	-0.183	-0.158	143	-17.5
chr5:142779221-142780417-	hsa-miR-4319	1			143	-18.37
chr3:149563798-149639014+	hsa-miR-4426	1	-0.149	-0.196	143	-9.48
chr5:167915607-167921655+	hsa-miR-4434	1	-0.34	-0.375	143	-15.19
chr5:167915607-167921655+	hsa-miR-4453	1			143	-19.4
chr10:7839010-7844817+	hsa-miR-4456	1		-0.027	143	-18.76
chr5:142779221-142780417-	hsa-miR-4460	1	-0.187	-0.175	143	-15.7
chr3:149563798-149639014+	hsa-miR-4464	1	-0.087	-0.129	143	-13.5
chr5:167915607-167921655+	hsa-miR-449b-3p	1	-0.204	-0.173	143	-16.76
chr3:149563798-149639014+	hsa-miR-4514	1	-0.247	-0.24	143	-18.16
chr2:32142995-32157204-	hsa-miR-4518	1			143	-23.94
chr5:142779221-142780417-	hsa-miR-4519	1	-0.097	-0.097	143	-20.57
chrX:79962926-79975155-	hsa-miR-4647	1	-0.246	-0.343	143	-12.62
chr5:142779221-142780417-	hsa-miR-4652-3p	1	-0.141	-0.369	143	-7.89
chr18:56363598-56367823+	hsa-miR-4654	1		-0.017	143	-23.56
chr3:71064700-71102924-	hsa-miR-4658	1		-0.001	143	-25.85
chr3:157839892-157841780+	hsa-miR-4659a-3p	1			143	-12.6
chrX:79962926-79975155-	hsa-miR-4660	1	-0.387	-0.3	143	-16.45
chr3:71064700-71102924-	hsa-miR-4660	1			143	-22.5
chr14:99924616-99932150-	hsa-miR-4672	1		0	143	-22.5
chr3:157839892-157841780+	hsa-miR-4680-5p	1	-0.325	-0.382	143	-11.69
chr5:142779221-142780417-	hsa-miR-4687-3p	1		-0.032	143	-25.46
chr2:61749746-61753656-	hsa-miR-4699-5p	1			143	-14.13
chr14:99924616-99932150-	hsa-miR-4712-3p	1			143	-13.27
chr3:71064700-71102924-	hsa-miR-4716-3p	1			143	-20.32
chr10:7839010-7844817+	hsa-miR-4720-5p	1	-0.181	-0.169	143	-13.48
chrX:79962926-79975155-	hsa-miR-4744	1		-0.047	143	-15.04
chr3:149563798-149639014+	hsa-miR-4753-3p	1			143	-17.22
chr10:7839010-7844817+	hsa-miR-4757-5p	1			143	-20.43
chr5:142779221-142780417-	hsa-miR-4778-3p	1		-0.033	143	-15.96
chr3:149563798-149639014+	hsa-miR-4796-5p	1	-0.131	-0.167	143	-10.72
chr5:142779221-142780417-	hsa-miR-4799-5p	1			143	-12.45
chr18:56363598-56367823+	hsa-miR-4803	1		-0.037	143	-11.68
chr3:149563798-149639014+	hsa-miR-5001-5p	1			143	-25.31
chr10:7839010-7844817+	hsa-miR-5001-5p	1			143	-21.7
chr5:167915607-167921655+	hsa-miR-5047	1		-0.055	143	-17.83
chr2:32142995-32157204-	hsa-miR-5194	1		-0.028	143	-22.7
chr10:7839010-7844817+	hsa-miR-520a-5p	1		-0.076	143	-13.72
chr14:99924616-99932150-	hsa-miR-548ax	1		-0.04	143	-11.27
chr5:142779221-142780417-	hsa-miR-548d-3p	1		-0.017	143	-11.21
chr11:33307959-33309057+	hsa-miR-548e-5p	1	-0.028	-0.144	143	-13.09
chr8:48308936-48320523+	hsa-miR-548g-3p	1		-0.004	143	-10.93
chr8:48308936-48320523+	hsa-miR-548i	1			143	-13.38
chr11:33307959-33309057+	hsa-miR-580-3p	1	-0.11	-0.204	143	-9.22
chr3:157839892-157841780+	hsa-miR-580-3p	1			143	-15.52
chr3:149563798-149639014+	hsa-miR-580-3p	1			143	-14.61
chr3:149563798-149639014+	hsa-miR-581	1	-0.089	-0.095	143	-15.23
chrX:79962926-79975155-	hsa-miR-582-3p	1	-0.368	-0.462	143	-14.14
chr11:33307959-33309057+	hsa-miR-584-5p	1	-0.129	-0.198	143	-16.78
chr5:142779221-142780417-	hsa-miR-587	1			143	-20.46
chrX:79962926-79975155-	hsa-miR-595	1			143	-18.14
chr5:142779221-142780417-	hsa-miR-605-5p	1		0.012	143	-18.17
chr14:99924616-99932150-	hsa-miR-6069	1			143	-30.06
chr5:167915607-167921655+	hsa-miR-607	1			143	-10.83
chr5:142779221-142780417-	hsa-miR-620	1			143	-12.61
chr5:167915607-167921655+	hsa-miR-627-3p	1			143	-20.21
chr3:157839892-157841780+	hsa-miR-6514-3p	1		-0.02	143	-16.3
chr3:71064700-71102924-	hsa-miR-656-5p	1		-0.043	143	-21.67
chr11:33307959-33309057+	hsa-miR-664b-5p	1			143	-26
chr14:99924616-99932150-	hsa-miR-6715a-3p	1	-0.24	-0.332	143	-15.08
chr3:71064700-71102924-	hsa-miR-6721-5p	1	-0.107	-0.032	143	-25.96
chr10:7839010-7844817+	hsa-miR-6741-3p	1			143	-22.04
chr18:56363598-56367823+	hsa-miR-6747-5p	1			143	-19.05
chr5:142779221-142780417-	hsa-miR-6751-5p	1			143	-21.04
chr5:142779221-142780417-	hsa-miR-6758-5p	1			143	-18.13
chr3:149563798-149639014+	hsa-miR-6772-5p	1		-0.032	143	-25.2
chr14:99924616-99932150-	hsa-miR-6793-3p	1	-0.203	-0.185	143	-16.3
chr11:33307959-33309057+	hsa-miR-6794-3p	1	-0.079	-0.105	143	-13.5
chr3:149563798-149639014+	hsa-miR-6799-5p	1	-0.197	-0.176	143	-19.2
chr3:157839892-157841780+	hsa-miR-6827-5p	1		-0.054	143	-23.96
chr5:142779221-142780417-	hsa-miR-6841-5p	1			143	-20.15
chr3:157839892-157841780+	hsa-miR-6845-5p	1			143	-20.84
chr18:56363598-56367823+	hsa-miR-6853-3p	1		-0.081	143	-19.4
chr2:32142995-32157204-	hsa-miR-6861-5p	1			143	-23.58
chr14:99924616-99932150-	hsa-miR-6864-5p	1			143	-14.3
chr5:142779221-142780417-	hsa-miR-6868-5p	1			143	-17.25
chr8:48308936-48320523+	hsa-miR-6869-5p	1	-0.182	-0.193	143	-16.35
chr3:157839892-157841780+	hsa-miR-6874-5p	1		-0.031	143	-14.21
chr10:7839010-7844817+	hsa-miR-6885-5p	1	-0.56	-0.357	143	-20.18
chr5:142779221-142780417-	hsa-miR-6885-5p	1		-0.01	143	-23.59
chr11:33307959-33309057+	hsa-miR-6894-3p	1	-0.159	-0.099	143	-11.61
chr5:142779221-142780417-	hsa-miR-6895-3p	1	-0.268	-0.284	143	-18.29
chr8:48308936-48320523+	hsa-miR-6895-3p	1	-0.189	-0.193	143	-13.82
chr5:142779221-142780417-	hsa-miR-7153-5p	1			143	-14.69
chr5:142779221-142780417-	hsa-miR-7161-3p	1			143	-22.93
chr8:48308936-48320523+	hsa-miR-8053	1			143	-18.73
chr10:7839010-7844817+	hsa-miR-8067	1			143	-15.11
chr10:7839010-7844817+	hsa-miR-873-5p	1			143	-15
chr3:149563798-149639014+	hsa-miR-106a-5p	1	-0.095	-0.174	142	-10.92
chr3:149563798-149639014+	hsa-miR-106b-5p	1	-0.067	-0.128	142	-10.94
chr5:167915607-167921655+	hsa-miR-1184	1		-0.056	142	-13.03
chr3:149563798-149639014+	hsa-miR-1207-3p	1	-0.429	-0.432	142	-15.25
chr5:142779221-142780417-	hsa-miR-1237-5p	1	-0.184	-0.009	142	-24.75
chr8:48308936-48320523+	hsa-miR-1243	1			142	-18.8
chr5:142779221-142780417-	hsa-miR-1248	1			142	-25.03
chr10:7839010-7844817+	hsa-miR-1255b-5p	1			142	-13.59
chr11:33307959-33309057+	hsa-miR-125a-5p	1	-0.038	0.007	142	-18.85
chr14:99924616-99932150-	hsa-miR-1270	1			142	-19.04
chr3:157839892-157841780+	hsa-miR-1273e	1	-0.13	-0.137	142	-13.87
chr5:167915607-167921655+	hsa-miR-1273g-5p	1			142	-18.74
chr2:32142995-32157204-	hsa-miR-1277-5p	1		-0.022	142	-12.46
chr14:99924616-99932150-	hsa-miR-129-5p	1	-0.053	-0.198	142	-15.1
chr8:48308936-48320523+	hsa-miR-1290	1			142	-16.99
chr3:71064700-71102924-	hsa-miR-130b-5p	1		-0.013	142	-19.58
chr8:48308936-48320523+	hsa-miR-1343-3p	1	-0.235	-0.216	142	-15.13
chrX:79962926-79975155-	hsa-miR-136-5p	1			142	-11.75
chr11:33307959-33309057+	hsa-miR-139-5p	1			142	-17.94
chr11:33307959-33309057+	hsa-miR-148a-3p	1	-0.323	-0.341	142	-16.14
chr5:167915607-167921655+	hsa-miR-148b-5p	1		-0.081	142	-9.84
chr3:71064700-71102924-	hsa-miR-150-3p	1			142	-21.2
chr3:71064700-71102924-	hsa-miR-1538	1		0.019	142	-26.37
chr3:149563798-149639014+	hsa-miR-17-5p	1	-0.095	-0.174	142	-10.54
chr3:157839892-157841780+	hsa-miR-185-3p	1			142	-24.04
chr11:33307959-33309057+	hsa-miR-1909-3p	1	-0.268	-0.207	142	-18.52
chr11:33307959-33309057+	hsa-miR-191-3p	1		-0.014	142	-19.99
chr5:142779221-142780417-	hsa-miR-1915-3p	1	-0.221	-0.198	142	-25.96
chr3:71064700-71102924-	hsa-miR-193a-5p	1		-0.011	142	-17.22
chr5:142779221-142780417-	hsa-miR-193b-3p	1	-0.051	-0.006	142	-22.44
chr11:33307959-33309057+	hsa-miR-196b-3p	1			142	-21.48
chr14:99924616-99932150-	hsa-miR-200a-3p	1	-0.114	-0.18	142	-12.78
chr3:149563798-149639014+	hsa-miR-20a-5p	1	-0.095	-0.174	142	-10.23
chrX:79962926-79975155-	hsa-miR-2113	1			142	-15.83
chr5:142779221-142780417-	hsa-miR-2116-3p	1	-0.346	-0.376	142	-19.23
chr3:149563798-149639014+	hsa-miR-2116-3p	1		-0.015	142	-14
chr5:142779221-142780417-	hsa-miR-2117	1	-0.03	-0.067	142	-11.69
chr10:7839010-7844817+	hsa-miR-215-3p	1	-0.024	-0.034	142	-14.65
chrX:79962926-79975155-	hsa-miR-217	1			142	-15.31
chr3:71064700-71102924-	hsa-miR-219a-1-3p	1		-0.055	142	-20.74
chr5:167915607-167921655+	hsa-miR-223-3p	1			142	-9.76
chr11:33307959-33309057+	hsa-miR-23a-3p	1			142	-17.09
chr3:149563798-149639014+	hsa-miR-302d-5p	1			142	-22.24
chr11:33307959-33309057+	hsa-miR-3117-5p	1		-0.041	142	-12.91
chr5:142779221-142780417-	hsa-miR-3119	1			142	-13.13
chr2:32142995-32157204-	hsa-miR-3120-5p	1	-0.298	-0.343	142	-13.84
chr8:48308936-48320523+	hsa-miR-3120-5p	1			142	-13.93
chr10:7839010-7844817+	hsa-miR-3152-5p	1		-0.059	142	-17.32
chrX:79962926-79975155-	hsa-miR-3158-3p	1			142	-24.8
chr18:56363598-56367823+	hsa-miR-3169	1			142	-18.28
chr3:71064700-71102924-	hsa-miR-3187-3p	1			142	-21.97
chr14:99924616-99932150-	hsa-miR-3189-5p	1	-0.245	-0.192	142	-18.77
chr3:149563798-149639014+	hsa-miR-335-3p	1	-0.034	-0.328	142	-7.37
chr11:33307959-33309057+	hsa-miR-342-3p	1		-0.061	142	-16
chr3:149563798-149639014+	hsa-miR-3614-3p	1			142	-20.21
chr11:33307959-33309057+	hsa-miR-3674	1	-0.152	-0.204	142	-9.71
chr3:157839892-157841780+	hsa-miR-3684	1	-0.187	-0.142	142	-12.85
chr10:7839010-7844817+	hsa-miR-3688-5p	1			142	-12.02
chrX:79962926-79975155-	hsa-miR-374b-3p	1			142	-11.68
chr3:157839892-157841780+	hsa-miR-378i	1	-0.169	-0.111	142	-19.02
chr3:149563798-149639014+	hsa-miR-3919	1	-0.266	-0.437	142	-11.38
chr5:167915607-167921655+	hsa-miR-3922-3p	1		-0.017	142	-20.4
chr5:167915607-167921655+	hsa-miR-3923	1			142	-14.61
chr2:32142995-32157204-	hsa-miR-3945	1			142	-25.52
chr5:142779221-142780417-	hsa-miR-3978	1		-0.018	142	-17.84
chr14:99924616-99932150-	hsa-miR-422a	1		-0.032	142	-14.21
chr5:142779221-142780417-	hsa-miR-4257	1	-0.164	-0.18	142	-17.84
chr3:71064700-71102924-	hsa-miR-4266	1		-0.059	142	-20.04
chr3:71064700-71102924-	hsa-miR-4268	1	-0.372	-0.301	142	-15.92
chr5:142779221-142780417-	hsa-miR-4293	1		-0.031	142	-19.79
chr11:33307959-33309057+	hsa-miR-4295	1			142	-11.04
chr3:71064700-71102924-	hsa-miR-4296	1			142	-17.18
chr3:71064700-71102924-	hsa-miR-4298	1	-0.202	-0.155	142	-13.12
chr10:7839010-7844817+	hsa-miR-4310	1	-0.105	-0.114	142	-13.61
chr2:32142995-32157204-	hsa-miR-4436b-5p	1	-0.124	-0.132	142	-9.94
chr5:142779221-142780417-	hsa-miR-4450	1			142	-19.65
chr10:7839010-7844817+	hsa-miR-4460	1	-0.094	-0.055	142	-14.37
chr3:149563798-149639014+	hsa-miR-4471	1		-0.059	142	-16.65
chr5:142779221-142780417-	hsa-miR-4472	1	-0.311	-0.206	142	-16.96
chr8:48308936-48320523+	hsa-miR-4496	1		-0.034	142	-23.65
chr3:149563798-149639014+	hsa-miR-4498	1			142	-22.72
chr3:71064700-71102924-	hsa-miR-450a-1-3p	1			142	-16.05
chr14:99924616-99932150-	hsa-miR-450a-2-3p	1		-0.022	142	-15.42
chr5:142779221-142780417-	hsa-miR-4511	1			142	-11.93
chr10:7839010-7844817+	hsa-miR-4538	1	-0.15	-0.108	142	-15.96
chr3:71064700-71102924-	hsa-miR-4643	1	-0.053	-0.093	142	-13.79
chr3:149563798-149639014+	hsa-miR-4659b-3p	1	-0.218	-0.377	142	-12.34
chr3:71064700-71102924-	hsa-miR-4680-5p	1		-0.062	142	-15.77
chr5:142779221-142780417-	hsa-miR-4682	1		-0.025	142	-15.36
chr5:142779221-142780417-	hsa-miR-4690-5p	1			142	-28.75
chr3:157839892-157841780+	hsa-miR-4714-5p	1		-0.044	142	-14.69
chr3:149563798-149639014+	hsa-miR-4720-3p	1		-0.075	142	-14.92
chr14:99924616-99932150-	hsa-miR-4728-5p	1	-0.24	-0.196	142	-23.63
chr3:149563798-149639014+	hsa-miR-4728-5p	1			142	-22.6
chr3:71064700-71102924-	hsa-miR-4740-5p	1	-0.333	-0.25	142	-15.62
chr14:99924616-99932150-	hsa-miR-4753-5p	1	-0.15	-0.124	142	-11.33
chr5:142779221-142780417-	hsa-miR-4762-5p	1		-0.003	142	-17.25
chr3:71064700-71102924-	hsa-miR-4763-3p	1			142	-28.79
chr5:167915607-167921655+	hsa-miR-4764-3p	1		-0.054	142	-14.34
chr11:33307959-33309057+	hsa-miR-4766-5p	1	-0.053	-0.149	142	-10.93
chr14:99924616-99932150-	hsa-miR-4766-5p	1		-0.007	142	-18.08
chrX:79962926-79975155-	hsa-miR-4776-3p	1	-0.305	-0.37	142	-13.42
chr3:149563798-149639014+	hsa-miR-4777-3p	1	-0.203	-0.204	142	-12.11
chr10:7839010-7844817+	hsa-miR-4784	1		-0.052	142	-21.12
chr11:33307959-33309057+	hsa-miR-4793-3p	1		0.021	142	-30.94
chr3:149563798-149639014+	hsa-miR-4793-5p	1		-0.018	142	-17.5
chrX:79962926-79975155-	hsa-miR-483-3p	1			142	-25.87
chr11:33307959-33309057+	hsa-miR-483-5p	1		-0.047	142	-24.08
chr2:32142995-32157204-	hsa-miR-487a-3p	1		-0.023	142	-17.85
chr14:99924616-99932150-	hsa-miR-5002-5p	1			142	-15.69
chr8:48308936-48320523+	hsa-miR-5002-5p	1			142	-15.4
chr3:149563798-149639014+	hsa-miR-5007-3p	1	-0.224	-0.395	142	-7.8
chr14:99924616-99932150-	hsa-miR-5008-5p	1	-0.296	-0.216	142	-16.33
chr2:32142995-32157204-	hsa-miR-5092	1	-0.162	-0.094	142	-21.43
chr3:149563798-149639014+	hsa-miR-5095	1	-0.201	-0.202	142	-14.65
chr3:149563798-149639014+	hsa-miR-513a-5p	1	-0.245	-0.275	142	-15.5
chr5:142779221-142780417-	hsa-miR-519e-5p	1	-0.039	-0.1	142	-16.14
chr3:149563798-149639014+	hsa-miR-520a-5p	1			142	-17.58
chr5:167915607-167921655+	hsa-miR-520f-5p	1			142	-16.99
chr3:157839892-157841780+	hsa-miR-541-5p	1		-0.043	142	-24.3
chr5:142779221-142780417-	hsa-miR-541-5p	1			142	-17.05
chr8:48308936-48320523+	hsa-miR-544b	1		-0.055	142	-17.51
chr5:142779221-142780417-	hsa-miR-548a-3p	1	-0.096	-0.234	142	-7.79
chr3:149563798-149639014+	hsa-miR-548ac	1	-0.063	-0.228	142	-8.4
chr18:56363598-56367823+	hsa-miR-548aq-5p	1			142	-9.17
chr11:33307959-33309057+	hsa-miR-548as-5p	1			142	-17.7
chr5:142779221-142780417-	hsa-miR-548ay-3p	1		-0.016	142	-15.3
chr18:56363598-56367823+	hsa-miR-548bb-5p	1			142	-8.25
chr18:56363598-56367823+	hsa-miR-548y	1			142	-8.47
chr2:32142995-32157204-	hsa-miR-5689	1		-0.027	142	-16.94
chr3:71064700-71102924-	hsa-miR-5698	1			142	-26.01
chr3:149563798-149639014+	hsa-miR-605-3p	1			142	-17.8
chr10:7839010-7844817+	hsa-miR-630	1	-0.239	-0.373	142	-8.76
chr5:142779221-142780417-	hsa-miR-640	1			142	-20.83
chr14:99924616-99932150-	hsa-miR-6507-5p	1		-0.025	142	-15.8
chr11:33307959-33309057+	hsa-miR-664a-3p	1		-0.048	142	-13.58
chr11:33307959-33309057+	hsa-miR-6721-5p	1		-0.04	142	-20.75
chr11:33307959-33309057+	hsa-miR-6722-3p	1	-0.268	-0.207	142	-15.92
chr5:142779221-142780417-	hsa-miR-6731-3p	1	-0.182	-0.219	142	-10.1
chr14:99924616-99932150-	hsa-miR-6736-5p	1			142	-29.2
chr5:142779221-142780417-	hsa-miR-6766-3p	1			142	-22.19
chr3:71064700-71102924-	hsa-miR-6772-3p	1	-0.113	-0.053	142	-12.32
chr5:142779221-142780417-	hsa-miR-6773-5p	1			142	-24.67
chr11:33307959-33309057+	hsa-miR-6774-3p	1			142	-24.76
chr3:71064700-71102924-	hsa-miR-6783-5p	1	-0.101	-0.099	142	-25.54
chr11:33307959-33309057+	hsa-miR-6786-3p	1		0.008	142	-29.68
chr5:142779221-142780417-	hsa-miR-6804-5p	1	-0.436	-0.33	142	-24.52
chr3:71064700-71102924-	hsa-miR-6804-5p	1			142	-22.53
chr14:99924616-99932150-	hsa-miR-6812-3p	1			142	-26.72
chr3:149563798-149639014+	hsa-miR-6828-3p	1		-0.036	142	-18.31
chrX:79962926-79975155-	hsa-miR-6847-3p	1		-0.036	142	-19.8
chr5:167915607-167921655+	hsa-miR-6851-5p	1	-0.245	-0.214	142	-15.68
chr10:7839010-7844817+	hsa-miR-6891-5p	1	-0.32	-0.373	142	-14.08
chr5:167915607-167921655+	hsa-miR-758-3p	1			142	-16.85
chr5:142779221-142780417-	hsa-miR-760	1			142	-26.16
chr10:7839010-7844817+	hsa-miR-7852-3p	1			142	-14
chr3:149563798-149639014+	hsa-miR-7856-5p	1		-0.027	142	-10.44
chr18:56363598-56367823+	hsa-miR-7974	1		-0.025	142	-19.4
chr3:157839892-157841780+	hsa-miR-8066	1	-0.082	-0.148	142	-9.45
chr11:33307959-33309057+	hsa-miR-8076	1		-0.013	142	-16.08
chr2:32142995-32157204-	hsa-miR-875-3p	1	-0.076	-0.137	142	-15.66
chr3:149563798-149639014+	hsa-miR-93-5p	1	-0.067	-0.128	142	-10.11
chr3:149563798-149639014+	hsa-miR-942-5p	1		-0.015	142	-14.88
chr11:33307959-33309057+	hsa-miR-99a-3p	1	-0.413	-0.417	142	-10.9
chr3:149563798-149639014+	hsa-let-7d-5p	1	-0.064	-0.068	141	-13.33
chr5:142779221-142780417-	hsa-miR-106a-3p	1	-0.185	-0.288	141	-12.11
chr10:7839010-7844817+	hsa-miR-1185-2-3p	1		-0.047	141	-19.2
chr14:99924616-99932150-	hsa-miR-1185-5p	1			141	-13.84
chr10:7839010-7844817+	hsa-miR-1225-5p	1		-0.01	141	-26.13
chr3:71064700-71102924-	hsa-miR-1229-5p	1	-0.128	-0.083	141	-16.57
chr14:99924616-99932150-	hsa-miR-1229-5p	1			141	-27.66
chr3:71064700-71102924-	hsa-miR-1234-3p	1			141	-20.64
chr3:157839892-157841780+	hsa-miR-1237-3p	1	-0.286	-0.305	141	-17.4
chr11:33307959-33309057+	hsa-miR-1250-3p	1	-0.008	-0.172	141	-8.08
chr5:142779221-142780417-	hsa-miR-1273d	1			141	-28.09
chr11:33307959-33309057+	hsa-miR-128-1-5p	1		-0.068	141	-22.83
chr11:33307959-33309057+	hsa-miR-128-2-5p	1		-0.068	141	-23.03
chr18:56363598-56367823+	hsa-miR-1287-3p	1			141	-19.28
chr5:142779221-142780417-	hsa-miR-1343-3p	1			141	-25.17
chrX:79962926-79975155-	hsa-miR-143-5p	1		-0.044	141	-13.39
chr5:142779221-142780417-	hsa-miR-148b-5p	1		-0.031	141	-18.03
chr14:99924616-99932150-	hsa-miR-149-3p	1	-0.286	-0.274	141	-27.94
chr14:99924616-99932150-	hsa-miR-149-5p	1	-0.127	-0.085	141	-17.87
chr3:157839892-157841780+	hsa-miR-151b	1	-0.456	-0.27	141	-20.57
chr14:99924616-99932150-	hsa-miR-15b-5p	1	-0.061	-0.013	141	-18
chr11:33307959-33309057+	hsa-miR-181a-3p	1		-0.04	141	-16.64
chr11:33307959-33309057+	hsa-miR-181b-5p	1	-0.02	-0.035	141	-21.53
chr11:33307959-33309057+	hsa-miR-181d-5p	1	-0.02	-0.035	141	-21.53
chr2:61749746-61753656-	hsa-miR-186-5p	1		-0.014	141	-13.42
chr11:33307959-33309057+	hsa-miR-187-5p	1	-0.321	-0.444	141	-14.88
chr11:33307959-33309057+	hsa-miR-18a-3p	1			141	-19.96
chr3:149563798-149639014+	hsa-miR-196b-3p	1		-0.025	141	-18.32
chr3:149563798-149639014+	hsa-miR-1976	1		-0.042	141	-15.84
chr8:48308936-48320523+	hsa-miR-204-3p	1	-0.147	-0.153	141	-16.55
chr3:149563798-149639014+	hsa-miR-204-5p	1	-0.037	-0.027	141	-15.88
chr10:7839010-7844817+	hsa-miR-205-5p	1	-0.096	-0.146	141	-11.3
chr5:142779221-142780417-	hsa-miR-208a-3p	1	-0.029	-0.003	141	-12.88
chr8:48308936-48320523+	hsa-miR-208b-5p	1			141	-15.3
chr5:142779221-142780417-	hsa-miR-208b-5p	1			141	-10.59
chr3:149563798-149639014+	hsa-miR-211-5p	1	-0.037	-0.027	141	-14.16
chr11:33307959-33309057+	hsa-miR-212-5p	1		-0.048	141	-16.48
chr11:33307959-33309057+	hsa-miR-218-2-3p	1			141	-11.73
chr3:149563798-149639014+	hsa-miR-2681-3p	1		-0.059	141	-12.28
chr10:7839010-7844817+	hsa-miR-2681-3p	1			141	-18.22
chr5:142779221-142780417-	hsa-miR-2682-5p	1			141	-26.64
chr10:7839010-7844817+	hsa-miR-26a-2-3p	1		-0.033	141	-7.63
chr14:99924616-99932150-	hsa-miR-29a-5p	1			141	-21.44
chr3:71064700-71102924-	hsa-miR-29b-2-5p	1	-0.109	-0.173	141	-10.19
chr10:7839010-7844817+	hsa-miR-29b-3p	1	-0.332	-0.307	141	-18.79
chr14:99924616-99932150-	hsa-miR-3064-5p	1	-0.273	-0.261	141	-18.33
chr11:33307959-33309057+	hsa-miR-3117-3p	1			141	-14.42
chr5:167915607-167921655+	hsa-miR-3139	1			141	-19.32
chr3:71064700-71102924-	hsa-miR-3140-5p	1		0.037	141	-10.01
chr5:142779221-142780417-	hsa-miR-3151-3p	1	-0.379	-0.367	141	-10.83
chr14:99924616-99932150-	hsa-miR-3156-3p	1	-0.294	-0.256	141	-13.73
chr8:48308936-48320523+	hsa-miR-3160-5p	1		-0.03	141	-19.64
chr5:142779221-142780417-	hsa-miR-3163	1		0.022	141	-16.1
chr5:142779221-142780417-	hsa-miR-3180-5p	1		0.001	141	-23.31
chr3:71064700-71102924-	hsa-miR-3192-5p	1			141	-21.27
chr3:71064700-71102924-	hsa-miR-3202	1	-0.064	-0.037	141	-19.19
chr5:142779221-142780417-	hsa-miR-329-5p	1		-0.042	141	-12.39
chr5:142779221-142780417-	hsa-miR-3614-5p	1	-0.227	-0.28	141	-13.52
chr5:142779221-142780417-	hsa-miR-3653-5p	1	-0.227	-0.221	141	-11.55
chr5:142779221-142780417-	hsa-miR-3663-5p	1			141	-22.03
chr5:167915607-167921655+	hsa-miR-3680-3p	1		-0.037	141	-19.63
chr5:167915607-167921655+	hsa-miR-3692-5p	1		-0.005	141	-23.22
chr11:33307959-33309057+	hsa-miR-371b-5p	1		-0.045	141	-15.67
chr3:149563798-149639014+	hsa-miR-380-5p	1			141	-18.53
chrX:79962926-79975155-	hsa-miR-3928-3p	1			141	-17.84
chr5:142779221-142780417-	hsa-miR-421	1	-0.054	-0.122	141	-11.5
chr10:7839010-7844817+	hsa-miR-4280	1	-0.248	-0.275	141	-14.95
chr2:61749746-61753656-	hsa-miR-4312	1		-0.065	141	-12.49
chr14:99924616-99932150-	hsa-miR-432-5p	1			141	-20.41
chr5:142779221-142780417-	hsa-miR-4433a-3p	1	-0.219	-0.234	141	-17.33
chr14:99924616-99932150-	hsa-miR-4433a-3p	1		-0.008	141	-22.49
chr5:167915607-167921655+	hsa-miR-4436b-3p	1			141	-25.18
chr3:71064700-71102924-	hsa-miR-4440	1	-0.509	-0.332	141	-20.47
chr5:167915607-167921655+	hsa-miR-4445-5p	1			141	-17.61
chr5:142779221-142780417-	hsa-miR-4448	1		-0.037	141	-22.24
chr11:33307959-33309057+	hsa-miR-4457	1			141	-21.03
chr14:99924616-99932150-	hsa-miR-4458	1			141	-21.15
chr3:157839892-157841780+	hsa-miR-4478	1	-0.159	-0.147	141	-16.44
chr5:167915607-167921655+	hsa-miR-4485-3p	1			141	-20.22
chr3:149563798-149639014+	hsa-miR-4487	1	-0.265	-0.25	141	-17.27
chr8:48308936-48320523+	hsa-miR-4490	1		-0.072	141	-15.24
chr3:157839892-157841780+	hsa-miR-4491	1			141	-15.75
chr2:32142995-32157204-	hsa-miR-4493	1	-0.193	-0.127	141	-14.71
chr8:48308936-48320523+	hsa-miR-4495	1			141	-11.62
chr18:56363598-56367823+	hsa-miR-450b-3p	1			141	-14.09
[truncated: 409 more rows]
