# Supplementary material for: Profiling and functional analysis of exosomal circRNAs from EBV-associated gastric carcinoma CSCs
Source: Research Square preprint supplement (doi:10.21203/rs.3.rs-6704451/v1), 2025-06-12
Supplement: Supplementary file 5 [file 9882a95f4582247246856261.xlsx]

## Sheet: Sheet1
miRNA binded circRNA summary of binding sites between miRNA and target. Total: the number of binding sites. context+ score & context score: The context+ score & context score from TargetScan. Structure Score & Free Energy: The thermodynamic properties of the binding site from miRanda.
circRNA	miRNA	Total	Context+	Context	Structure	Energy
EBV:158625-159918+	hsa-miR-1539	5	-0.835	-0.251	740	-113.17
EBV:146233-150348+	hsa-miR-6889-5p	5	-0.031	0.093	723	-145.8
EBV:158625-159918+	hsa-miR-4449	4	-0.176	0.033	621	-150.41
EBV:146233-150348+	hsa-miR-608	4	-0.135	-0.065	620	-136.01
EBV:146233-150348+	hsa-miR-1248	4	-0.201	-0.418	614	-77.98
EBV:146233-150348+	hsa-miR-4640-5p	4	-0.586	-0.392	612	-129.85
EBV:146233-150348+	hsa-miR-4706	4	-0.619	-0.226	607	-104.94
EBV:146233-150348+	hsa-miR-4435	4	-0.265	-0.164	605	-97.3
EBV:146233-150348+	hsa-miR-4726-5p	4	-0.505	-0.29	605	-103.63
EBV:156527-158751+	hsa-miR-3616-3p	4	-0.258	-0.167	595	-94.42
EBV:146233-150348+	hsa-miR-3127-5p	4	-0.116	-0.098	592	-92.08
EBV:146233-150348+	hsa-miR-1273d	4	-0.061	-0.169	591	-89.24
EBV:146233-150348+	hsa-miR-4423-5p	4	-0.114	-0.059	586	-79.05
EBV:156527-158751+	hsa-miR-5581-5p	4	-0.093	-0.097	583	-85.29
EBV:146233-150348+	hsa-miR-6769b-3p	4	-0.008	-0.085	579	-85.02
EBV:146233-150348+	hsa-miR-1207-5p	4	-0.005	0.111	574	-120.75
EBV:146233-150348+	hsa-miR-4749-5p	3	-0.721	-0.291	496	-94.91
EBV:156527-158751+	hsa-miR-2861	3	-0.455	-0.271	466	-85.65
EBV:158625-159918+	hsa-miR-637	3	-0.38	-0.167	465	-92.37
EBV:146233-150348+	hsa-miR-103a-3p	3	-0.256	-0.342	463	-64.33
EBV:146233-150348+	hsa-miR-107	3	-0.256	-0.342	463	-62.15
EBV:146233-150348+	hsa-miR-5000-3p	3	-0.426	-0.505	463	-58.95
EBV:156527-158751+	hsa-miR-1248	3	-0.221	-0.288	462	-56.85
EBV:156527-158751+	hsa-miR-7107-5p	3	-0.438	-0.253	461	-90.29
EBV:146233-150348+	hsa-miR-6865-5p	3	-0.105	-0.069	460	-75.76
EBV:158625-159918+	hsa-miR-6775-3p	3	-0.364	-0.08	458	-73.96
EBV:158625-159918+	hsa-miR-6787-5p	3	-0.312	-0.185	457	-91.23
EBV:146233-150348+	hsa-miR-6782-5p	3	-0.108	-0.039	456	-82.17
EBV:156527-158751+	hsa-miR-3127-3p	3	-0.293	-0.23	454	-78.19
EBV:146233-150348+	hsa-miR-541-3p	3	-0.449	-0.33	454	-62.75
EBV:156527-158751+	hsa-miR-6836-3p	3	-0.453	-0.319	454	-69.01
EBV:146233-150348+	hsa-miR-6882-3p	3	-0.126	-0.031	454	-78.66
EBV:158625-159918+	hsa-miR-4707-5p	3	-0.378	0.048	452	-102.59
EBV:158625-159918+	hsa-miR-1291	3	-0.291	-0.053	448	-77.25
EBV:156527-158751+	hsa-miR-612	3	-0.06	-0.004	448	-79.18
EBV:158625-159918+	hsa-miR-6741-3p	3	-0.181	-0.018	448	-77.09
EBV:146233-150348+	hsa-miR-6760-3p	3	-0.269	-0.446	446	-53.6
EBV:146233-150348+	hsa-miR-141-5p	3	-0.252	-0.436	445	-53.41
EBV:146233-150348+	hsa-miR-3064-3p	3	-0.175	-0.22	445	-50.68
EBV:156527-158751+	hsa-miR-4254	3	-0.246	-0.215	445	-58.32
EBV:146233-150348+	hsa-miR-6766-5p	3	-0.031	-0.024	445	-68.12
EBV:156527-158751+	hsa-miR-6785-3p	3	-0.474	-0.155	445	-61.85
EBV:158625-159918+	hsa-miR-3940-3p	3	-0.375	0.02	443	-89.88
EBV:146233-150348+	hsa-miR-5008-5p	3	-0.095	0.059	443	-80.3
EBV:146233-150348+	hsa-miR-6747-3p	3	-0.134	-0.123	443	-69.27
EBV:146233-150348+	hsa-miR-1226-3p	3	-0.328	-0.209	442	-73
EBV:146233-150348+	hsa-miR-5682	3	-0.19	-0.145	442	-48.97
EBV:146233-150348+	hsa-miR-1203	3		-0.009	441	-73.73
EBV:146233-150348+	hsa-miR-1236-3p	3		0.019	441	-62.19
EBV:156527-158751+	hsa-miR-5189-5p	3	-0.06	0.002	441	-74.46
EBV:158625-159918+	hsa-miR-3190-5p	3	-0.299	-0.178	440	-78.26
EBV:146233-150348+	hsa-miR-4436a	3	-0.442	-0.563	440	-58.83
EBV:156527-158751+	hsa-miR-4804-5p	3	-0.419	-0.174	440	-59.08
EBV:146233-150348+	hsa-miR-6729-3p	3	-0.186	-0.233	440	-66.05
EBV:146233-150348+	hsa-miR-7111-3p	3		0.015	440	-56.5
EBV:158625-159918+	hsa-miR-4532	3	-0.876	-0.197	439	-82.61
EBV:146233-150348+	hsa-miR-4743-5p	3		0.101	439	-81.33
EBV:146233-150348+	hsa-miR-6764-5p	3	-0.007	0.003	439	-70.82
EBV:146233-150348+	hsa-miR-4663	3		0.058	438	-77.05
EBV:158625-159918+	hsa-miR-4725-5p	3	-0.383	-0.238	438	-63.65
EBV:146233-150348+	hsa-miR-7160-3p	3	-0.343	-0.14	438	-53.41
EBV:158625-159918+	hsa-miR-1914-5p	3	-0.064	-0.008	436	-71.14
EBV:156527-158751+	hsa-miR-3138	3		-0.066	436	-82.13
EBV:156527-158751+	hsa-miR-4665-5p	3	-0.238	-0.133	436	-79.43
EBV:156527-158751+	hsa-miR-4513	3	-0.152	-0.203	434	-64.46
EBV:146233-150348+	hsa-miR-3065-3p	3	-0.165	-0.129	433	-63.76
EBV:146233-150348+	hsa-miR-3667-3p	3			433	-73.48
EBV:146233-150348+	hsa-miR-652-5p	3		0.138	433	-71.11
EBV:158625-159918+	hsa-miR-7106-5p	3	-0.123	0.068	432	-82.32
EBV:146233-150348+	hsa-miR-10b-3p	3	-0.021	-0.086	431	-55.56
EBV:146233-150348+	hsa-miR-378c	3	-0.217	-0.194	431	-68.14
EBV:146233-150348+	hsa-miR-487a-5p	3		0.104	431	-55.42
EBV:146233-150348+	hsa-miR-654-5p	3	-0.412	-0.268	431	-56.79
EBV:146233-150348+	hsa-miR-6746-5p	3		0.049	430	-81.93
EBV:146233-150348+	hsa-miR-4651	3	-0.267	-0.076	427	-71.59
EBV:146233-150348+	hsa-miR-671-5p	3	-0.051	0.001	426	-80.82
EBV:158625-159918+	hsa-miR-6735-3p	3		0.025	426	-66.33
EBV:146233-150348+	hsa-miR-6781-5p	3	-0.092	0.019	426	-83.54
EBV:158625-159918+	hsa-miR-6889-3p	3	-0.297	-0.195	425	-49.99
EBV:146233-150348+	hsa-miR-3972	3			424	-82.25
EBV:156527-158751+	hsa-miR-4778-3p	3	-0.102	-0.168	423	-55
EBV:146233-150348+	hsa-miR-424-5p	2	-0.405	-0.391	326	-37.24
EBV:156527-158751+	hsa-miR-7153-5p	2	-0.221	-0.393	323	-38.47
EBV:158625-159918+	hsa-miR-4750-5p	2	-0.308	-0.07	320	-67.78
EBV:146233-150348+	hsa-miR-6815-5p	2	-0.132	-0.116	317	-51.09
EBV:146233-150348+	hsa-miR-6780b-5p	2	-0.045	-0.1	316	-48.72
EBV:146233-150348+	hsa-miR-4747-5p	2	-0.11	-0.212	315	-46.29
EBV:146233-150348+	hsa-miR-4685-5p	2	-0.134	-0.06	314	-54.99
EBV:39902-40193-	hsa-miR-637	2	-0.518	-0.281	314	-59.31
EBV:156527-158751+	hsa-miR-637	2	-0.32	-0.23	314	-51.59
EBV:146233-150348+	hsa-miR-15b-5p	2	-0.351	-0.394	313	-34.61
EBV:158625-159918+	hsa-miR-504-5p	2	-0.277	-0.2	313	-52.73
EBV:146233-150348+	hsa-miR-5088-3p	2	-0.273	-0.312	313	-41.04
EBV:158625-159918+	hsa-miR-942-5p	2	-0.066	-0.126	313	-44.32
EBV:158625-159918+	hsa-miR-1287-3p	2	-0.154	-0.138	312	-39.18
EBV:146233-150348+	hsa-miR-29a-3p	2	-0.268	-0.253	312	-38.82
EBV:146233-150348+	hsa-miR-328-5p	2			312	-70.62
EBV:156527-158751+	hsa-miR-3126-5p	2	-0.212	-0.152	311	-46.18
EBV:158625-159918+	hsa-miR-4659b-3p	2	-0.046	-0.176	311	-36.14
EBV:156527-158751+	hsa-miR-4472	2	-0.245	-0.158	310	-51.92
EBV:156527-158751+	hsa-miR-550a-5p	2	-0.042	-0.036	310	-48.27
EBV:146233-150348+	hsa-miR-711	2	-0.242	-0.2	310	-49.01
EBV:146233-150348+	hsa-miR-214-5p	2	-0.06	-0.071	309	-53.36
EBV:146233-150348+	hsa-miR-4667-3p	2	-0.161	-0.193	309	-48.61
EBV:158625-159918+	hsa-miR-5787	2	-0.086	-0.03	309	-75.05
EBV:156527-158751+	hsa-miR-181c-3p	2	-0.261	-0.24	308	-43.76
EBV:146233-150348+	hsa-miR-370-3p	2	-0.047	0.006	308	-53.47
EBV:146233-150348+	hsa-miR-4678	2	-0.052	-0.153	308	-30.72
EBV:146233-150348+	hsa-miR-5697	2	-0.253	-0.328	308	-28.98
EBV:146233-150348+	hsa-miR-6778-3p	2	-0.348	-0.207	308	-52.69
EBV:156527-158751+	hsa-miR-6851-5p	2	-0.161	-0.17	308	-61.4
EBV:156527-158751+	hsa-miR-7161-3p	2			308	-57.24
EBV:156527-158751+	hsa-miR-5587-3p	2	-0.426	-0.169	307	-43.55
EBV:146233-150348+	hsa-miR-5681a	2	-0.196	-0.34	307	-35.49
EBV:146233-150348+	hsa-miR-6893-3p	2	-0.074	-0.079	307	-49.14
EBV:156527-158751+	hsa-miR-4640-5p	2	-0.147	-0.133	306	-58.82
EBV:146233-150348+	hsa-miR-4763-3p	2	-0.051	-0.062	306	-61.55
EBV:158625-159918+	hsa-miR-6880-5p	2	-0.108	-0.064	306	-61.73
EBV:146233-150348+	hsa-miR-3687	2			305	-53.41
EBV:156527-158751+	hsa-miR-146a-5p	2	-0.23	-0.408	304	-33.66
EBV:156527-158751+	hsa-miR-298	2	-0.003	-0.06	304	-48.81
EBV:146233-150348+	hsa-miR-29c-3p	2	-0.268	-0.253	304	-33.73
EBV:158625-159918+	hsa-miR-378a-5p	2	-0.213	-0.201	304	-50.82
EBV:146233-150348+	hsa-miR-4758-3p	2	-0.533	-0.431	304	-45.63
EBV:156527-158751+	hsa-miR-6746-5p	2	-0.227	-0.136	304	-47.21
EBV:146233-150348+	hsa-miR-6836-5p	2	-0.052	-0.004	304	-53.69
EBV:146233-150348+	hsa-miR-6893-5p	2	-0.096	-0.145	304	-47.72
EBV:156527-158751+	hsa-miR-141-5p	2	-0.113	-0.225	303	-36.09
EBV:158625-159918+	hsa-miR-3657	2	-0.408	-0.307	303	-35.47
EBV:146233-150348+	hsa-miR-4271	2	-0.035	-0.085	303	-45.58
EBV:146233-150348+	hsa-miR-4323	2	-0.266	-0.161	303	-35.22
EBV:146233-150348+	hsa-miR-4641	2	-0.177	-0.124	303	-42.39
EBV:158625-159918+	hsa-miR-4659a-3p	2	-0.037	-0.161	303	-28.25
EBV:146233-150348+	hsa-miR-4796-3p	2	-0.111	-0.097	303	-39.36
EBV:156527-158751+	hsa-miR-146b-5p	2	-0.202	-0.362	302	-32.5
EBV:146233-150348+	hsa-miR-15a-5p	2	-0.341	-0.392	302	-31.1
EBV:156527-158751+	hsa-miR-181d-3p	2	-0.381	-0.105	302	-59.29
EBV:146233-150348+	hsa-miR-29b-3p	2	-0.268	-0.253	302	-31.8
EBV:146233-150348+	hsa-miR-3162-5p	2	-0.024	0.039	302	-49.03
EBV:156527-158751+	hsa-miR-4471	2	-0.16	-0.145	302	-30.87
EBV:158625-159918+	hsa-miR-4632-3p	2	-0.321	-0.148	302	-46.78
EBV:158625-159918+	hsa-miR-4649-5p	2		0.107	302	-58.2
EBV:158625-159918+	hsa-miR-4755-3p	2	-0.239	-0.112	302	-48.19
EBV:156527-158751+	hsa-miR-6752-5p	2	-0.182	-0.086	302	-54.25
EBV:158625-159918+	hsa-miR-6774-3p	2	-0.2	-0.104	302	-50.31
EBV:156527-158751+	hsa-miR-6840-5p	2	-0.36	-0.043	302	-51.54
EBV:146233-150348+	hsa-miR-7113-3p	2	-0.077	0.004	302	-63.81
EBV:156527-158751+	hsa-miR-1293	2	-0.308	-0.217	301	-42.52
EBV:146233-150348+	hsa-miR-3145-3p	2	-0.02	-0.114	301	-33.08
EBV:146233-150348+	hsa-miR-4256	2	-0.168	-0.196	301	-32.54
EBV:158625-159918+	hsa-miR-4632-5p	2	-0.217	-0.221	301	-61.32
EBV:156527-158751+	hsa-miR-6765-5p	2	-0.046	-0.025	301	-65.25
EBV:156527-158751+	hsa-miR-6808-3p	2	-0.259	-0.283	301	-47.25
EBV:156527-158751+	hsa-miR-7113-3p	2	-0.091	-0.086	301	-52.15
EBV:146233-150348+	hsa-miR-7703	2	-0.193	-0.167	301	-46.72
EBV:156527-158751+	hsa-miR-1539	2	-0.368	-0.158	300	-45.58
EBV:158625-159918+	hsa-miR-3917	2	-0.646	-0.231	300	-46.02
EBV:156527-158751+	hsa-miR-4637	2	-0.078	-0.151	300	-28.89
EBV:158625-159918+	hsa-miR-4684-5p	2	-0.178	-0.189	300	-34.79
EBV:156527-158751+	hsa-miR-4714-3p	2	-0.286	-0.308	300	-36.32
EBV:158625-159918+	hsa-miR-4793-5p	2	-0.089	-0.035	300	-45.72
EBV:156527-158751+	hsa-miR-550a-3-5p	2	-0.023	-0.005	300	-47.13
EBV:146233-150348+	hsa-miR-6840-3p	2	-0.005	-0.06	300	-51.83
EBV:156527-158751+	hsa-miR-766-3p	2	-0.289	-0.192	300	-48.81
EBV:146233-150348+	hsa-miR-16-5p	2	-0.354	-0.367	299	-36.48
EBV:146233-150348+	hsa-miR-3189-5p	2		0.041	299	-58.36
EBV:158625-159918+	hsa-miR-3192-5p	2	-0.107	-0.086	299	-48.5
EBV:156527-158751+	hsa-miR-3620-3p	2	-0.226	-0.129	299	-43
EBV:146233-150348+	hsa-miR-6777-5p	2	-0.04	0.005	299	-53.28
EBV:146233-150348+	hsa-miR-6826-3p	2	-0.442	-0.319	299	-52.72
EBV:146233-150348+	hsa-miR-6838-5p	2	-0.362	-0.396	299	-30.08
EBV:156527-158751+	hsa-miR-6860	2	-0.05	-0.023	299	-52.52
EBV:146233-150348+	hsa-miR-1245b-5p	2	-0.057	-0.086	298	-33.5
EBV:158625-159918+	hsa-miR-1538	2		0.052	298	-63.62
EBV:146233-150348+	hsa-miR-1909-5p	2	-0.174	-0.122	298	-52.45
EBV:146233-150348+	hsa-miR-370-5p	2	-0.357	-0.282	298	-36.19
EBV:146233-150348+	hsa-miR-4802-3p	2	-0.015	-0.166	298	-33.92
EBV:146233-150348+	hsa-miR-497-5p	2	-0.341	-0.392	298	-33.17
EBV:158625-159918+	hsa-miR-608	2	-0.206	-0.144	298	-50.4
EBV:146233-150348+	hsa-miR-6729-5p	2	-0.011	0.13	298	-58.78
EBV:146233-150348+	hsa-miR-6794-5p	2	-0.24	-0.188	298	-52.42
EBV:146233-150348+	hsa-miR-6845-3p	2	-0.096	-0.129	298	-52.07
EBV:146233-150348+	hsa-miR-6860	2			298	-54.26
EBV:146233-150348+	hsa-miR-1287-5p	2		0.009	297	-52.44
EBV:146233-150348+	hsa-miR-3162-3p	2	-0.315	-0.217	297	-44.33
EBV:146233-150348+	hsa-miR-425-3p	2		-0.015	297	-54.65
EBV:146233-150348+	hsa-miR-4716-3p	2	-0.212	-0.125	297	-45.02
EBV:39902-40193-	hsa-miR-4731-5p	2	-0.176	-0.004	297	-45.33
EBV:158625-159918+	hsa-miR-545-3p	2	-0.115	-0.239	297	-32.36
EBV:156527-158751+	hsa-miR-591	2	-0.136	-0.15	297	-33.13
EBV:146233-150348+	hsa-miR-632	2	-0.001	-0.015	297	-42.49
EBV:146233-150348+	hsa-miR-6846-3p	2	-0.09	-0.079	297	-42.2
EBV:156527-158751+	hsa-miR-6894-5p	2	-0.104	-0.17	297	-46
EBV:146233-150348+	hsa-miR-8075	2	-0.207	-0.189	297	-41.64
EBV:146233-150348+	hsa-miR-1237-3p	2	-0.013	-0.157	296	-40.91
EBV:146233-150348+	hsa-miR-1271-3p	2	-0.079	-0.017	296	-48.11
EBV:146233-150348+	hsa-miR-181a-5p	2	-0.046	-0.195	296	-37.38
EBV:158625-159918+	hsa-miR-3180-3p	2	-0.258	-0.118	296	-53.09
EBV:156527-158751+	hsa-miR-3187-5p	2	-0.05	-0.023	296	-45.36
EBV:158625-159918+	hsa-miR-324-3p	2	-0.197	-0.047	296	-41.78
EBV:146233-150348+	hsa-miR-4704-5p	2	-0.01	-0.029	296	-38.01
EBV:156527-158751+	hsa-miR-4787-5p	2	-0.225	-0.062	296	-60.95
EBV:158625-159918+	hsa-miR-6731-5p	2	-0.008	0.115	296	-47.95
EBV:158625-159918+	hsa-miR-6842-5p	2	-0.214	-0.14	296	-51.24
EBV:156527-158751+	hsa-miR-6842-5p	2	-0.173	-0.022	296	-51.76
EBV:146233-150348+	hsa-miR-6894-3p	2	-0.13	-0.084	296	-32.62
EBV:156527-158751+	hsa-miR-7112-5p	2	-0.468	-0.301	296	-41.77
EBV:156527-158751+	hsa-miR-7152-3p	2	-0.411	-0.303	296	-61.53
EBV:146233-150348+	hsa-miR-8073	2	-0.017	-0.052	296	-51.7
EBV:146233-150348+	hsa-miR-22-3p	2	-0.322	-0.21	295	-30.38
EBV:158625-159918+	hsa-miR-23a-5p	2			295	-64.22
EBV:158625-159918+	hsa-miR-3195	2	-0.72	-0.117	295	-51.96
EBV:156527-158751+	hsa-miR-3657	2	-0.253	-0.23	295	-33.39
EBV:156527-158751+	hsa-miR-4647	2	-0.064	-0.131	295	-45.65
EBV:158625-159918+	hsa-miR-4697-5p	2	-0.394	-0.17	295	-47.28
EBV:146233-150348+	hsa-miR-4736	2	-0.134	-0.174	295	-38.81
EBV:156527-158751+	hsa-miR-491-5p	2			295	-58.24
EBV:146233-150348+	hsa-miR-5003-5p	2		-0.008	295	-38.97
EBV:39902-40193-	hsa-miR-6803-5p	2	-0.118	0.034	295	-64.9
EBV:158625-159918+	hsa-miR-770-5p	2	-0.066	0.015	295	-51.88
EBV:146233-150348+	hsa-miR-345-5p	2			294	-51.68
EBV:146233-150348+	hsa-miR-5195-5p	2	-0.234	-0.148	294	-42.98
EBV:146233-150348+	hsa-miR-602	2		0.099	294	-60.25
EBV:156527-158751+	hsa-miR-6791-5p	2	-0.214	-0.032	294	-53.43
EBV:146233-150348+	hsa-miR-6808-5p	2	-0.068	-0.098	294	-40.29
EBV:146233-150348+	hsa-miR-6822-3p	2			294	-43.58
EBV:146233-150348+	hsa-miR-6862-5p	2	-0.198	-0.191	294	-36.86
EBV:146233-150348+	hsa-miR-1243	2	-0.101	-0.102	293	-38.38
EBV:146233-150348+	hsa-miR-3943	2	-0.307	-0.167	293	-44.99
EBV:146233-150348+	hsa-miR-4464	2	-0.058	-0.027	293	-24.68
EBV:158625-159918+	hsa-miR-4522	2	-0.104	-0.092	293	-43.75
EBV:156527-158751+	hsa-miR-4688	2			293	-46.7
EBV:146233-150348+	hsa-miR-601	2	-0.057	-0.052	293	-37.36
EBV:146233-150348+	hsa-miR-615-5p	2		0.087	293	-57.12
EBV:146233-150348+	hsa-miR-6757-3p	2	-0.317	-0.316	293	-27.79
EBV:146233-150348+	hsa-miR-6763-3p	2			293	-63.47
EBV:146233-150348+	hsa-miR-6773-3p	2	-0.067	-0.193	293	-36.22
EBV:158625-159918+	hsa-miR-6795-5p	2	-0.317	-0.102	293	-61.87
EBV:156527-158751+	hsa-miR-6852-5p	2	-0.218	-0.137	293	-41.79
EBV:146233-150348+	hsa-miR-6875-5p	2		0.069	293	-60.81
EBV:156527-158751+	hsa-miR-1255b-2-3p	2	-0.11	-0.105	292	-39.25
EBV:146233-150348+	hsa-miR-18a-5p	2	-0.03	-0.081	292	-39.41
EBV:146233-150348+	hsa-miR-18b-5p	2	-0.03	-0.081	292	-38.35
EBV:158625-159918+	hsa-miR-342-5p	2		0.029	292	-42.53
EBV:146233-150348+	hsa-miR-3616-3p	2	-0.026	0.02	292	-46.14
EBV:146233-150348+	hsa-miR-4695-5p	2		0.088	292	-63.04
EBV:146233-150348+	hsa-miR-4723-3p	2	-0.027	-0.116	292	-37.89
EBV:146233-150348+	hsa-miR-4724-3p	2	-0.305	-0.344	292	-37.58
EBV:146233-150348+	hsa-miR-4755-3p	2		0.03	292	-47.82
EBV:146233-150348+	hsa-miR-5587-3p	2	-0.158	-0.023	292	-53.39
EBV:146233-150348+	hsa-miR-574-3p	2		0.031	292	-43.71
EBV:146233-150348+	hsa-miR-585-5p	2		0.033	292	-47.44
EBV:146233-150348+	hsa-miR-6762-3p	2	-0.121	-0.065	292	-51.18
EBV:146233-150348+	hsa-miR-7111-5p	2		-0.021	292	-52.47
EBV:156527-158751+	hsa-miR-3186-3p	2	-0.303	-0.161	291	-43.79
EBV:146233-150348+	hsa-miR-3186-5p	2	-0.091	0.008	291	-48.07
EBV:158625-159918+	hsa-miR-3615	2	-0.145	-0.043	291	-48.75
EBV:156527-158751+	hsa-miR-3663-5p	2	-0.286	-0.251	291	-45.9
EBV:146233-150348+	hsa-miR-378f	2	-0.217	-0.218	291	-40.19
EBV:156527-158751+	hsa-miR-4313	2	-0.213	0.061	291	-53.43
EBV:146233-150348+	hsa-miR-4313	2	-0.107	0.014	291	-44.04
EBV:158625-159918+	hsa-miR-4663	2		0.033	291	-45.36
EBV:146233-150348+	hsa-miR-589-3p	2			291	-35.95
EBV:146233-150348+	hsa-miR-6501-5p	2	-0.052	-0.111	291	-42.06
EBV:156527-158751+	hsa-miR-6720-5p	2	-0.161	0	291	-56.38
EBV:146233-150348+	hsa-miR-6762-5p	2	-0.075	0.022	291	-56.22
EBV:146233-150348+	hsa-miR-6787-3p	2	-0.168	-0.163	291	-35.17
EBV:146233-150348+	hsa-miR-6800-3p	2	-0.07	-0.136	291	-34.79
EBV:146233-150348+	hsa-miR-6801-3p	2		0.034	291	-48.57
EBV:146233-150348+	hsa-miR-6801-5p	2			291	-49.67
EBV:39902-40193-	hsa-miR-1268a	2	-0.627	-0.209	290	-36.45
EBV:39902-40193-	hsa-miR-1268b	2	-0.627	-0.209	290	-36.45
EBV:158625-159918+	hsa-miR-1913	2	-0.178	-0.016	290	-40.59
EBV:146233-150348+	hsa-miR-195-5p	2	-0.344	-0.352	290	-29.61
EBV:146233-150348+	hsa-miR-3145-5p	2		0.08	290	-27.97
EBV:156527-158751+	hsa-miR-4483	2	-0.289	-0.186	290	-33.01
EBV:146233-150348+	hsa-miR-4682	2			290	-55.93
EBV:146233-150348+	hsa-miR-5088-5p	2	-0.032	-0.004	290	-51.51
EBV:158625-159918+	hsa-miR-6746-3p	2	-0.489	-0.103	290	-51.8
EBV:146233-150348+	hsa-miR-6749-3p	2	-0.112	-0.1	290	-45.63
EBV:39902-40193-	hsa-miR-6852-5p	2	-0.103	0.044	290	-53.58
EBV:156527-158751+	hsa-miR-6875-5p	2	-0.221	-0.167	290	-39.32
EBV:146233-150348+	hsa-miR-8080	2		-0.009	290	-51.68
EBV:146233-150348+	hsa-miR-1915-5p	2		-0.014	289	-48.76
EBV:146233-150348+	hsa-miR-2467-3p	2			289	-42.49
EBV:158625-159918+	hsa-miR-3180	2	-0.258	-0.118	289	-46.73
EBV:146233-150348+	hsa-miR-3190-5p	2	-0.146	-0.108	289	-34.43
EBV:156527-158751+	hsa-miR-4662a-3p	2	-0.06	-0.221	289	-22.34
EBV:146233-150348+	hsa-miR-4687-5p	2	-0.266	-0.258	289	-54.42
EBV:158625-159918+	hsa-miR-4712-3p	2	-0.145	-0.186	289	-35.33
EBV:156527-158751+	hsa-miR-4771	2	-0.119	-0.09	289	-28.42
EBV:158625-159918+	hsa-miR-5705	2			289	-48.92
EBV:156527-158751+	hsa-miR-589-3p	2	-0.127	-0.225	289	-39.82
EBV:156527-158751+	hsa-miR-6072	2	-0.088	-0.085	289	-34.38
EBV:39902-40193-	hsa-miR-6742-3p	2	-0.085	-0.027	289	-37.54
EBV:146233-150348+	hsa-miR-6745	2			289	-46
EBV:146233-150348+	hsa-miR-6787-5p	2	-0.057	0.09	289	-54.73
EBV:158625-159918+	hsa-miR-6815-3p	2		0.024	289	-39.28
EBV:156527-158751+	hsa-miR-6884-3p	2	-0.273	-0.231	289	-45.55
EBV:158625-159918+	hsa-miR-6887-5p	2	-0.359	-0.11	289	-55.57
EBV:146233-150348+	hsa-miR-7157-5p	2		0.05	289	-34.72
EBV:156527-158751+	hsa-miR-758-3p	2	-0.227	-0.384	289	-36.48
EBV:146233-150348+	hsa-let-7c-3p	2	-0.11	-0.381	288	-23.59
EBV:158625-159918+	hsa-miR-1271-3p	2	-0.191	-0.074	288	-44.94
EBV:146233-150348+	hsa-miR-1298-3p	2			288	-34.49
EBV:146233-150348+	hsa-miR-150-3p	2	-0.13	-0.135	288	-42.05
EBV:146233-150348+	hsa-miR-3195	2	-0.231	-0.093	288	-54.09
EBV:146233-150348+	hsa-miR-3690	2	-0.176	-0.132	288	-43.58
EBV:146233-150348+	hsa-miR-378a-3p	2	-0.217	-0.218	288	-42.14
EBV:146233-150348+	hsa-miR-4253	2	-0.206	-0.181	288	-42.23
EBV:156527-158751+	hsa-miR-4469	2	-0.175	-0.193	288	-41.78
EBV:158625-159918+	hsa-miR-4640-5p	2		0.045	288	-57.29
EBV:146233-150348+	hsa-miR-4665-3p	2			288	-69.45
EBV:156527-158751+	hsa-miR-4683	2			288	-51.99
EBV:156527-158751+	hsa-miR-4767	2		-0.013	288	-73.87
EBV:158625-159918+	hsa-miR-4767	2		0.036	288	-58.75
EBV:146233-150348+	hsa-miR-6769a-3p	2		0.021	288	-56.5
EBV:146233-150348+	hsa-miR-6890-3p	2		-0.031	288	-51.65
EBV:146233-150348+	hsa-miR-1225-3p	2	-0.177	-0.074	287	-49.8
EBV:146233-150348+	hsa-miR-1226-5p	2		0.038	287	-57.19
EBV:39902-40193-	hsa-miR-1468-5p	2			287	-52.43
EBV:146233-150348+	hsa-miR-4445-5p	2			287	-27.84
EBV:156527-158751+	hsa-miR-4453	2	-0.117	-0.162	287	-35.43
EBV:146233-150348+	hsa-miR-4485-5p	2	-0.237	0.001	287	-36.57
EBV:146233-150348+	hsa-miR-4509	2			287	-30.37
EBV:149581-150348+	hsa-miR-4532	2	-0.608	-0.39	287	-57.1
EBV:146233-150348+	hsa-miR-4532	2	-0.446	-0.279	287	-57.1
EBV:146233-150348+	hsa-miR-4638-3p	2	-0.111	-0.083	287	-47.93
EBV:146233-150348+	hsa-miR-4708-5p	2			287	-47.86
EBV:146233-150348+	hsa-miR-4739	2		0.047	287	-50.81
EBV:146233-150348+	hsa-miR-4760-5p	2			287	-25.08
EBV:146233-150348+	hsa-miR-4772-5p	2	-0.217	-0.258	287	-29.8
EBV:146233-150348+	hsa-miR-5091	2	-0.041	0.1	287	-37.4
EBV:156527-158751+	hsa-miR-588	2	-0.051	-0.012	287	-43.18
EBV:146233-150348+	hsa-miR-6128	2	-0.009	-0.121	287	-29.02
EBV:156527-158751+	hsa-miR-6505-3p	2	-0.081	-0.063	287	-38.07
EBV:158625-159918+	hsa-miR-663a	2	-0.275	-0.123	287	-50.03
EBV:156527-158751+	hsa-miR-671-5p	2	-0.101	-0.097	287	-38.59
EBV:156527-158751+	hsa-miR-6735-3p	2	-0.202	-0.135	287	-36.62
EBV:156527-158751+	hsa-miR-6815-3p	2		0.023	287	-41.61
EBV:360-951+	hsa-miR-6829-5p	2	-0.318	-0.273	287	-37.62
EBV:146233-150348+	hsa-miR-7107-5p	2		0.103	287	-58.1
EBV:146233-150348+	hsa-miR-298	2		0.05	286	-47.52
EBV:156527-158751+	hsa-miR-302d-5p	2			286	-35.78
EBV:156527-158751+	hsa-miR-361-3p	2	-0.021	0.014	286	-44.16
EBV:146233-150348+	hsa-miR-4726-3p	2			286	-57.69
EBV:360-951+	hsa-miR-4779	2	-0.148	-0.105	286	-40.39
EBV:146233-150348+	hsa-miR-604	2	-0.036	-0.056	286	-39
EBV:146233-150348+	hsa-miR-646	2		0.055	286	-36.75
EBV:146233-150348+	hsa-miR-6737-5p	2	-0.195	-0.127	286	-52.12
EBV:156527-158751+	hsa-miR-6756-3p	2	-0.303	-0.246	286	-30.2
EBV:146233-150348+	hsa-miR-6791-5p	2	-0.143	0.027	286	-57.67
EBV:146233-150348+	hsa-miR-6827-5p	2	-0.174	-0.105	286	-43.46
EBV:146233-150348+	hsa-miR-1254	2		-0.013	285	-45.4
EBV:146233-150348+	hsa-miR-383-3p	2	-0.271	-0.263	285	-33.82
EBV:146233-150348+	hsa-miR-3934-5p	2			285	-45.08
EBV:156527-158751+	hsa-miR-4446-5p	2	-0.054	-0.088	285	-39.18
EBV:146233-150348+	hsa-miR-4717-3p	2	-0.125	-0.124	285	-44.17
EBV:146233-150348+	hsa-miR-593-5p	2		0.008	285	-49.92
EBV:156527-158751+	hsa-miR-663a	2	-0.472	-0.155	285	-56.45
EBV:158625-159918+	hsa-miR-6785-5p	2	-0.025	0.108	285	-63.58
EBV:146233-150348+	hsa-miR-6796-5p	2			285	-48.26
EBV:146233-150348+	hsa-miR-6870-3p	2			285	-47.99
EBV:158625-159918+	hsa-miR-765	2	-0.036	0.053	285	-37.16
EBV:146233-150348+	hsa-miR-940	2	-0.068	-0.046	285	-40.78
EBV:146233-150348+	hsa-miR-1247-3p	2	-0.064	0.029	284	-49.55
EBV:156527-158751+	hsa-miR-1825	2	-0.262	-0.198	284	-29.67
EBV:158625-159918+	hsa-miR-1911-5p	2		0.055	284	-44.63
EBV:146233-150348+	hsa-miR-28-3p	2	-0.007	-0.005	284	-26.58
EBV:360-951+	hsa-miR-3154	2		-0.05	284	-37.96
EBV:146233-150348+	hsa-miR-3922-5p	2	-0.125	-0.005	284	-47.37
EBV:146233-150348+	hsa-miR-3974	2	-0.135	-0.15	284	-30.77
EBV:156527-158751+	hsa-miR-423-5p	2			284	-51.03
EBV:158625-159918+	hsa-miR-4683	2			284	-56.29
EBV:158625-159918+	hsa-miR-4783-5p	2	-0.211	0.035	284	-61.01
EBV:146233-150348+	hsa-miR-4790-3p	2		0.059	284	-27.47
EBV:146233-150348+	hsa-miR-513c-5p	2		0.02	284	-45.32
EBV:146233-150348+	hsa-miR-663a	2		0.058	284	-53.15
EBV:146233-150348+	hsa-miR-6789-5p	2		0.104	284	-67.24
EBV:146233-150348+	hsa-miR-767-5p	2	-0.056	-0.008	284	-37.21
EBV:158625-159918+	hsa-miR-892b	2		0.072	284	-44.75
EBV:156527-158751+	hsa-miR-10b-3p	2			283	-35.68
EBV:146233-150348+	hsa-miR-34c-5p	2	-0.045	0.032	283	-41.22
EBV:158625-159918+	hsa-miR-381-5p	2		0.107	283	-46.08
EBV:156527-158751+	hsa-miR-4761-3p	2	-0.089	-0.013	283	-38.49
EBV:158625-159918+	hsa-miR-486-5p	2	-0.084	-0.079	283	-33.66
EBV:146233-150348+	hsa-miR-487b-5p	2			283	-34.55
EBV:146233-150348+	hsa-miR-548ad-3p	2			283	-20.53
EBV:158625-159918+	hsa-miR-6499-5p	2	-0.267	-0.085	283	-50.78
EBV:146233-150348+	hsa-miR-654-3p	2		0.074	283	-38.29
EBV:158625-159918+	hsa-miR-6840-5p	2	-0.242	-0.006	283	-52.06
EBV:156527-158751+	hsa-miR-7107-3p	2			283	-50.33
EBV:146233-150348+	hsa-miR-1291	2		0.055	282	-47.2
EBV:146233-150348+	hsa-miR-1302	2		0.165	282	-34.05
EBV:146233-150348+	hsa-miR-3916	2			282	-41.1
EBV:146233-150348+	hsa-miR-4297	2	-0.229	-0.235	282	-39.88
EBV:156527-158751+	hsa-miR-4664-3p	2			282	-55.06
EBV:146233-150348+	hsa-miR-4783-5p	2	-0.156	0.072	282	-56.37
EBV:146233-150348+	hsa-miR-491-3p	2	-0.022	-0.094	282	-22.63
EBV:146233-150348+	hsa-miR-506-5p	2	-0.019	-0.176	282	-30.01
EBV:146233-150348+	hsa-miR-611	2			282	-56.72
EBV:146233-150348+	hsa-miR-619-3p	2	-0.156	-0.125	282	-56.07
EBV:146233-150348+	hsa-miR-6716-5p	2		0.151	282	-43.52
EBV:39902-40193-	hsa-miR-6749-3p	2		0.096	282	-59.2
EBV:146233-150348+	hsa-miR-6775-5p	2		-0.002	282	-57.63
EBV:146233-150348+	hsa-miR-6799-5p	2		0.03	282	-46.97
EBV:146233-150348+	hsa-miR-7109-5p	2			282	-55.9
EBV:146233-150348+	hsa-miR-7847-3p	2			282	-47.92
EBV:158625-159918+	hsa-miR-8085	2	-0.027	0.083	282	-45.16
EBV:146233-150348+	hsa-miR-93-3p	2			282	-36.59
EBV:158625-159918+	hsa-miR-939-5p	2			282	-55.81
EBV:156527-158751+	hsa-miR-1275	2	-0.211	-0.087	281	-34.36
EBV:146233-150348+	hsa-miR-3621	2		0.095	281	-53.91
EBV:360-951+	hsa-miR-4644	2			281	-39.38
EBV:158625-159918+	hsa-miR-6089	2	-0.117	-0.027	281	-61.58
EBV:146233-150348+	hsa-miR-658	2			281	-49.36
EBV:156527-158751+	hsa-miR-6733-3p	2	-0.232	-0.208	281	-28.54
EBV:146233-150348+	hsa-miR-1224-3p	2	-0.198	-0.151	280	-31.9
EBV:156527-158751+	hsa-miR-1234-3p	2	-0.336	-0.083	280	-32.71
EBV:156527-158751+	hsa-miR-1271-3p	2		-0.024	280	-37.8
EBV:146233-150348+	hsa-miR-377-3p	2	-0.102	-0.182	280	-27.51
EBV:156527-158751+	hsa-miR-661	2	-0.151	-0.018	280	-38.85
EBV:146233-150348+	hsa-miR-6816-3p	2		0.022	280	-31.23
EBV:158625-159918+	hsa-miR-6861-5p	2		-0.008	280	-41.89
EBV:146233-150348+	hsa-miR-6888-5p	2		-0.016	280	-37.27
EBV:146233-150348+	hsa-miR-7973	2		0.01	280	-31.29
EBV:156527-158751+	hsa-miR-6511a-5p	1	-0.098	-0.153	176	-28.2
EBV:146233-150348+	hsa-miR-4753-5p	1	-0.008	-0.069	174	-25.66
EBV:158625-159918+	hsa-miR-6762-5p	1	-0.184	-0.08	174	-38.78
EBV:149581-150348+	hsa-miR-1248	1	-0.083	-0.156	173	-21.56
EBV:158625-159918+	hsa-miR-6081	1	-0.16	-0.133	173	-34.89
EBV:146233-150348+	hsa-miR-3976	1	-0.134	-0.234	172	-20.45
EBV:146233-150348+	hsa-miR-6812-5p	1	-0.288	-0.31	172	-35.82
EBV:146233-150348+	hsa-miR-767-3p	1	-0.008	-0.048	172	-28.96
EBV:146233-150348+	hsa-miR-3622a-5p	1	-0.163	-0.078	171	-29.64
EBV:146233-150348+	hsa-miR-6774-3p	1	-0.246	-0.079	170	-30
EBV:156527-158751+	hsa-miR-6861-5p	1	-0.277	-0.18	170	-31.92
EBV:39902-40193-	hsa-miR-762	1	-0.113	-0.038	170	-41.77
EBV:158625-159918+	hsa-miR-329-3p	1	-0.176	-0.217	169	-21.47
EBV:146233-150348+	hsa-miR-4690-3p	1	-0.24	-0.237	169	-33.29
EBV:158625-159918+	hsa-miR-6791-5p	1	-0.335	-0.151	169	-37.08
EBV:146233-150348+	hsa-miR-181b-5p	1	-0.046	-0.195	168	-22.67
EBV:158625-159918+	hsa-miR-3147	1	-0.154	-0.107	168	-42.02
EBV:146233-150348+	hsa-miR-5094	1	-0.112	-0.169	168	-22.83
EBV:39902-40193-	hsa-miR-642b-5p	1	-0.026	0.027	168	-31.06
EBV:39902-40193-	hsa-miR-6786-3p	1	-0.194	0.006	168	-31.54
EBV:158625-159918+	hsa-miR-3140-3p	1			167	-23.54
EBV:156527-158751+	hsa-miR-4511	1	-0.039	-0.146	167	-22.43
EBV:156527-158751+	hsa-miR-4664-5p	1	-0.117	-0.03	167	-30.39
EBV:156527-158751+	hsa-miR-600	1	-0.149	-0.261	167	-24.34
EBV:156527-158751+	hsa-miR-6068	1	-0.526	-0.241	167	-34.34
EBV:158625-159918+	hsa-miR-6068	1	-0.518	-0.236	167	-34.34
EBV:158625-159918+	hsa-miR-6501-3p	1	-0.041	-0.041	167	-35.66
EBV:156527-158751+	hsa-miR-6749-5p	1	-0.114	0.017	167	-36.69
EBV:158625-159918+	hsa-miR-6879-5p	1	-0.226	-0.236	167	-32.89
EBV:156527-158751+	hsa-miR-29b-1-5p	1	-0.2	-0.253	166	-17.25
EBV:158625-159918+	hsa-miR-4673	1	-0.163	-0.18	166	-37.51
EBV:156527-158751+	hsa-miR-4717-5p	1	-0.109	-0.093	166	-31.7
EBV:146233-150348+	hsa-miR-4761-5p	1	-0.1	-0.09	166	-23.6
EBV:158625-159918+	hsa-miR-548s	1	-0.106	-0.136	166	-23.54
EBV:158625-159918+	hsa-miR-658	1	-0.166	-0.057	166	-28.14
EBV:146233-150348+	hsa-miR-6862-3p	1	-0.057	-0.052	166	-31.45
EBV:158625-159918+	hsa-miR-6862-3p	1			166	-39.34
EBV:156527-158751+	hsa-miR-8076	1	-0.046	-0.107	166	-16.96
EBV:158625-159918+	hsa-let-7i-3p	1	-0.172	-0.065	165	-21.41
EBV:360-951+	hsa-miR-1252-5p	1	-0.136	-0.199	165	-14.25
EBV:149581-150348+	hsa-miR-6780b-5p	1	-0.128	-0.092	165	-23.94
EBV:146233-150348+	hsa-miR-181d-5p	1	-0.037	-0.179	164	-20.51
EBV:158625-159918+	hsa-miR-1910-5p	1	-0.073	-0.069	164	-25.37
EBV:156527-158751+	hsa-miR-3116	1	-0.116	-0.04	164	-22.43
EBV:149581-150348+	hsa-miR-370-3p	1	-0.084	-0.034	164	-27.92
EBV:360-951+	hsa-miR-3908	1	-0.12	-0.172	164	-18.59
EBV:156527-158751+	hsa-miR-499b-3p	1	-0.07	-0.117	164	-19.09
EBV:360-951+	hsa-miR-6084	1	-0.312	-0.18	164	-33.06
EBV:158625-159918+	hsa-miR-6721-5p	1	-0.229	-0.206	164	-27.31
EBV:39902-40193-	hsa-miR-6805-3p	1	-0.257	-0.149	164	-27.13
EBV:158625-159918+	hsa-miR-6865-5p	1	-0.142	-0.097	164	-26.37
EBV:158625-159918+	hsa-miR-6886-3p	1	-0.446	-0.381	164	-30.23
EBV:146233-150348+	hsa-miR-7113-5p	1	-0.047	-0.078	164	-22.68
EBV:39902-40193-	hsa-miR-7155-5p	1	-0.069	-0.016	164	-29.23
EBV:146233-150348+	hsa-miR-1197	1	-0.218	-0.235	163	-23.63
EBV:158625-159918+	hsa-miR-1255b-2-3p	1	-0.049	-0.082	163	-21.37
EBV:146233-150348+	hsa-miR-125b-1-3p	1	-0.183	-0.15	163	-25.62
EBV:360-951+	hsa-miR-15b-5p	1	-0.324	-0.211	163	-24.08
EBV:156527-158751+	hsa-miR-24-2-5p	1	-0.09	-0.064	163	-27.45
EBV:146233-150348+	hsa-miR-6736-3p	1		0.048	163	-31.5
EBV:158625-159918+	hsa-miR-6746-5p	1	-0.14	-0.067	163	-44.22
EBV:146233-150348+	hsa-A497:A504	1	-0.125	-0.144	163	-28.35
EBV:156527-158751+	hsa-miR-1285-3p	1	-0.097	-0.1	162	-22.91
EBV:146233-150348+	hsa-miR-181a-3p	1	-0.169	-0.1	162	-27.45
EBV:360-951+	hsa-miR-4519	1	-0.329	-0.226	162	-27.78
EBV:146233-150348+	hsa-miR-4697-5p	1	-0.064	-0.014	162	-30.2
EBV:156527-158751+	hsa-miR-4700-3p	1	-0.08	-0.098	162	-19.8
EBV:156527-158751+	hsa-miR-6079	1	-0.173	-0.201	162	-25.6
EBV:146233-150348+	hsa-miR-665	1		0.08	162	-30.74
EBV:158625-159918+	hsa-miR-6815-5p	1	-0.133	-0.081	162	-31.75
EBV:146233-150348+	hsa-miR-892c-3p	1	-0.04	-0.203	162	-17.67
EBV:146233-150348+	hsa-miR-1268b	1	-0.216	-0.103	161	-31.61
EBV:156527-158751+	hsa-miR-3191-5p	1	-0.182	-0.212	161	-25.6
EBV:146233-150348+	hsa-miR-4433a-5p	1	-0.174	-0.113	161	-26.77
EBV:146233-150348+	hsa-miR-509-5p	1	-0.002	-0.106	161	-18.42
EBV:39902-40193-	hsa-miR-5787	1	-0.12	-0.058	161	-35.36
EBV:158625-159918+	hsa-miR-6769a-5p	1	-0.258	-0.253	161	-22.67
EBV:156527-158751+	hsa-miR-6842-3p	1	-0.256	-0.249	161	-25.37
EBV:156527-158751+	hsa-miR-6853-5p	1	-0.354	-0.272	161	-29.8
EBV:149581-150348+	hsa-miR-7703	1	-0.225	-0.236	161	-24.88
EBV:146233-150348+	hsa-miR-1301-3p	1	-0.296	-0.206	160	-24.99
EBV:156527-158751+	hsa-miR-3197	1	-0.286	-0.144	160	-28.9
EBV:146233-150348+	hsa-miR-3615	1	-0.02	0.011	160	-29.71
EBV:146233-150348+	hsa-miR-4433b-5p	1	-0.014	-0.016	160	-28.47
EBV:360-951+	hsa-miR-4643	1	-0.219	-0.272	160	-15.69
EBV:146233-150348+	hsa-miR-4660	1	-0.165	-0.151	160	-24.7
EBV:156527-158751+	hsa-miR-4668-5p	1	-0.053	-0.157	160	-15.61
EBV:149581-150348+	hsa-miR-4678	1	-0.051	-0.098	160	-17.17
EBV:158625-159918+	hsa-miR-4777-3p	1	-0.2	-0.148	160	-16.52
EBV:146233-150348+	hsa-miR-4787-3p	1	-0.131	-0.035	160	-30.89
EBV:156527-158751+	hsa-miR-551b-5p	1	-0.034	-0.228	160	-25.45
EBV:39902-40193-	hsa-miR-615-5p	1	-0.348	-0.073	160	-30.77
EBV:156527-158751+	hsa-miR-6722-5p	1	-0.267	-0.108	160	-26.49
EBV:39902-40193-	hsa-miR-6769b-3p	1			160	-37.54
EBV:360-951+	hsa-miR-6838-5p	1	-0.261	-0.199	160	-20.52
EBV:360-951+	hsa-miR-6891-5p	1	-0.08	-0.077	160	-24.55
EBV:39902-40193-	hsa-miR-7152-3p	1	-0.172	-0.111	160	-24.85
EBV:156527-158751+	hsa-miR-92a-2-5p	1	-0.224	-0.193	160	-21.08
EBV:158625-159918+	hsa-miR-1909-3p	1	-0.214	-0.167	159	-23.13
EBV:146233-150348+	hsa-miR-3927-3p	1			159	-23.9
EBV:39902-40193-	hsa-miR-4254	1	-0.304	-0.183	159	-23.57
EBV:146233-150348+	hsa-miR-4496	1	-0.084	-0.22	159	-16.92
EBV:39902-40193-	hsa-miR-4505	1	-0.148	-0.104	159	-32.02
EBV:156527-158751+	hsa-miR-4655-3p	1	-0.49	-0.289	159	-27.58
EBV:149581-150348+	hsa-miR-4669	1	-0.383	-0.253	159	-23.55
EBV:146233-150348+	hsa-miR-4669	1	-0.215	-0.139	159	-23.55
EBV:158625-159918+	hsa-miR-4712-5p	1	-0.047	0.011	159	-22.21
EBV:146233-150348+	hsa-miR-512-5p	1	-0.344	-0.331	159	-20.51
EBV:156527-158751+	hsa-miR-5681b	1			159	-28.72
EBV:146233-150348+	hsa-miR-586	1	-0.208	-0.347	159	-11.44
EBV:158625-159918+	hsa-miR-6726-5p	1	-0.263	-0.104	159	-27.34
EBV:158625-159918+	hsa-miR-6780a-5p	1	-0.063	-0.05	159	-28.66
EBV:156527-158751+	hsa-miR-6787-5p	1	-0.514	-0.224	159	-32.3
EBV:158625-159918+	hsa-miR-6804-3p	1	-0.065	-0.019	159	-22.59
EBV:39902-40193-	hsa-miR-6813-5p	1		0.046	159	-34.44
EBV:146233-150348+	hsa-miR-6845-5p	1	-0.075	0.022	159	-25.98
EBV:146233-150348+	hsa-miR-6886-5p	1	-0.119	0.059	159	-24.93
EBV:146233-150348+	hsa-miR-7161-3p	1	-0.037	-0.081	159	-19.04
EBV:39902-40193-	hsa-miR-7851-3p	1	-0.154	-0.082	159	-21.95
EBV:39902-40193-	hsa-miR-8086	1	-0.147	-0.079	159	-25.89
EBV:158625-159918+	hsa-miR-1307-3p	1	-0.29	-0.189	158	-23.89
EBV:156527-158751+	hsa-miR-1908-5p	1	-0.524	-0.226	158	-27.2
EBV:146233-150348+	hsa-miR-215-3p	1	-0.001	-0.122	158	-14.28
EBV:156527-158751+	hsa-miR-3193	1		0.035	158	-31.51
EBV:39902-40193-	hsa-miR-361-3p	1	-0.3	-0.1	158	-32.54
EBV:146233-150348+	hsa-miR-3617-3p	1	-0.013	-0.049	158	-17.16
EBV:149581-150348+	hsa-miR-3650	1	-0.137	-0.113	158	-24
EBV:146233-150348+	hsa-miR-3650	1	-0.043	-0.053	158	-24
EBV:156527-158751+	hsa-miR-4258	1	-0.28	-0.093	158	-26.78
EBV:146233-150348+	hsa-miR-4465	1	-0.032	-0.094	158	-20.23
EBV:149581-150348+	hsa-miR-4641	1	-0.177	-0.113	158	-25.47
EBV:158625-159918+	hsa-miR-4656	1			158	-34.48
EBV:158625-159918+	hsa-miR-4714-5p	1	-0.026	-0.024	158	-22.54
EBV:158625-159918+	hsa-miR-4732-3p	1	-0.14	-0.126	158	-27.81
EBV:156527-158751+	hsa-miR-4749-5p	1	-0.281	-0.056	158	-29.71
EBV:149581-150348+	hsa-miR-4778-3p	1	-0.081	-0.17	158	-18.12
EBV:146233-150348+	hsa-miR-4778-3p	1	-0.052	-0.151	158	-18.12
EBV:149581-150348+	hsa-miR-5088-3p	1	-0.168	-0.182	158	-21.43
EBV:158625-159918+	hsa-miR-639	1	-0.158	-0.04	158	-23.44
EBV:146233-150348+	hsa-miR-6715b-3p	1	-0.113	-0.159	158	-23.35
EBV:39902-40193-	hsa-miR-6791-5p	1	-0.118	-0.023	158	-30.37
EBV:146233-150348+	hsa-miR-6833-5p	1	-0.101	-0.127	158	-23.9
EBV:158625-159918+	hsa-miR-6877-5p	1	-0.464	-0.133	158	-23.93
EBV:39902-40193-	hsa-miR-7113-3p	1	-0.042	0.005	158	-30.18
EBV:360-951+	hsa-miR-935	1	-0.114	-0.168	158	-16.13
EBV:146233-150348+	hsa-miR-153-5p	1	-0.046	-0.289	157	-9.15
EBV:146233-150348+	hsa-miR-19b-1-5p	1			157	-20.2
EBV:156527-158751+	hsa-miR-205-5p	1	-0.041	-0.099	157	-16.67
EBV:146233-150348+	hsa-miR-2116-3p	1	-0.132	-0.2	157	-23.03
EBV:146233-150348+	hsa-miR-3138	1			157	-24.32
EBV:158625-159918+	hsa-miR-3192-3p	1			157	-33.25
EBV:39902-40193-	hsa-miR-3692-5p	1	-0.24	-0.135	157	-23.8
EBV:146233-150348+	hsa-miR-4443	1	-0.184	-0.123	157	-26.48
EBV:156527-158751+	hsa-miR-4525	1	-0.182	-0.078	157	-24.71
EBV:146233-150348+	hsa-miR-4650-5p	1	-0.073	-0.089	157	-18.7
EBV:146233-150348+	hsa-miR-4721	1		0.041	157	-31.48
EBV:156527-158751+	hsa-miR-4726-5p	1	-0.166	-0.164	157	-27.94
EBV:158625-159918+	hsa-miR-4763-3p	1	-0.191	-0.145	157	-25.87
EBV:360-951+	hsa-miR-5004-5p	1	-0.357	-0.333	157	-21.53
EBV:360-951+	hsa-miR-558	1	-0.246	-0.228	157	-20.22
EBV:39902-40193-	hsa-miR-6070	1	-0.18	-0.048	157	-32.15
EBV:146233-150348+	hsa-miR-6502-3p	1	-0.074	-0.143	157	-16.66
EBV:158625-159918+	hsa-miR-663b	1	-0.138	-0.054	157	-29.52
EBV:156527-158751+	hsa-miR-6715a-3p	1	-0.077	-0.115	157	-16.34
EBV:158625-159918+	hsa-miR-6715a-3p	1	-0.063	-0.105	157	-16.34
EBV:360-951+	hsa-miR-6770-5p	1	-0.388	-0.433	157	-17.36
EBV:156527-158751+	hsa-miR-6782-3p	1	-0.073	-0.177	157	-19.19
EBV:39902-40193-	hsa-miR-6848-5p	1	-0.337	-0.082	157	-36.09
EBV:149581-150348+	hsa-miR-6886-3p	1	-0.252	-0.211	157	-16.14
EBV:146233-150348+	hsa-miR-6886-3p	1	-0.224	-0.193	157	-16.14
EBV:146233-150348+	hsa-miR-744-3p	1	-0.256	-0.194	157	-20.41
EBV:146233-150348+	hsa-miR-8074	1		0.059	157	-29.51
EBV:146233-150348+	hsa-miR-1268a	1	-0.207	-0.087	156	-28.06
EBV:146233-150348+	hsa-miR-19b-2-5p	1			156	-19.83
EBV:146233-150348+	hsa-miR-3074-3p	1		0.008	156	-19.08
EBV:360-951+	hsa-miR-3130-3p	1	-0.209	-0.16	156	-30.15
EBV:146233-150348+	hsa-miR-3130-3p	1	-0.085	-0.048	156	-24.42
EBV:156527-158751+	hsa-miR-3194-5p	1	-0.205	-0.147	156	-26.08
EBV:146233-150348+	hsa-miR-376a-3p	1	-0.128	-0.198	156	-13.1
EBV:146233-150348+	hsa-miR-376b-3p	1	-0.128	-0.198	156	-13.58
EBV:146233-150348+	hsa-miR-378b	1	-0.236	-0.249	156	-18.92
EBV:146233-150348+	hsa-miR-378i	1	-0.217	-0.218	156	-16.58
EBV:158625-159918+	hsa-miR-3907	1			156	-34.61
EBV:146233-150348+	hsa-miR-3939	1	-0.281	-0.096	156	-21.44
EBV:158625-159918+	hsa-miR-4258	1	-0.165	-0.007	156	-31.33
EBV:39902-40193-	hsa-miR-4466	1	-0.246	-0.091	156	-28.96
EBV:156527-158751+	hsa-miR-4494	1	-0.066	-0.087	156	-21.23
EBV:146233-150348+	hsa-miR-4524a-5p	1	-0.166	-0.167	156	-16.12
EBV:146233-150348+	hsa-miR-4659a-3p	1			156	-22.82
EBV:149581-150348+	hsa-miR-4659a-3p	1			156	-22.82
EBV:158625-159918+	hsa-miR-4695-5p	1	-0.082	-0.023	156	-27.1
EBV:158625-159918+	hsa-miR-5088-3p	1	-0.156	-0.178	156	-26.96
EBV:146233-150348+	hsa-miR-516b-5p	1	-0.321	-0.322	156	-20.92
EBV:158625-159918+	hsa-miR-642a-5p	1	-0.106	-0.098	156	-22.01
EBV:146233-150348+	hsa-miR-6752-5p	1			156	-37.42
EBV:156527-158751+	hsa-miR-6761-5p	1	-0.083	-0.147	156	-19.61
EBV:146233-150348+	hsa-miR-6836-3p	1	-0.164	-0.128	156	-28.32
EBV:156527-158751+	hsa-miR-6856-3p	1	-0.174	-0.147	156	-18.88
EBV:156527-158751+	hsa-miR-770-5p	1	-0.124	-0.122	156	-22.27
EBV:158625-159918+	hsa-miR-1204	1	-0.188	-0.078	155	-24.03
EBV:146233-150348+	hsa-miR-1228-5p	1	-0.128	-0.074	155	-26.86
EBV:158625-159918+	hsa-miR-1273h-5p	1	-0.073	-0.066	155	-29.56
EBV:156527-158751+	hsa-miR-149-5p	1	-0.017	0.012	155	-24.14
EBV:360-951+	hsa-miR-15a-5p	1	-0.303	-0.207	155	-17.6
EBV:39902-40193-	hsa-miR-185-3p	1	-0.116	-0.029	155	-24.39
EBV:156527-158751+	hsa-miR-1910-3p	1	-0.061	-0.091	155	-21.52
EBV:146233-150348+	hsa-miR-2110	1		-0.013	155	-27.82
EBV:146233-150348+	hsa-miR-2681-3p	1			155	-27.16
EBV:149581-150348+	hsa-miR-301b-5p	1	-0.12	-0.118	155	-20.19
EBV:146233-150348+	hsa-miR-301b-5p	1	-0.087	-0.097	155	-20.19
EBV:146233-150348+	hsa-miR-3135b	1	-0.131	-0.097	155	-22.89
EBV:146233-150348+	hsa-miR-3196	1			155	-33.19
EBV:156527-158751+	hsa-miR-330-3p	1			155	-30.28
EBV:146233-150348+	hsa-miR-421	1		0.012	155	-23.68
EBV:158625-159918+	hsa-miR-4300	1	-0.232	-0.098	155	-22.66
EBV:156527-158751+	hsa-miR-4308	1	-0.259	-0.167	155	-22.1
EBV:360-951+	hsa-miR-4313	1	-0.217	-0.098	155	-23.85
EBV:360-951+	hsa-miR-4523	1			155	-24.62
EBV:146233-150348+	hsa-miR-4524b-5p	1	-0.156	-0.151	155	-17.17
EBV:146233-150348+	hsa-miR-4652-3p	1			155	-21.99
EBV:360-951+	hsa-miR-4676-5p	1	-0.179	-0.158	155	-26.71
EBV:149581-150348+	hsa-miR-4677-5p	1	-0.178	-0.318	155	-16.58
EBV:146233-150348+	hsa-miR-4677-5p	1	-0.137	-0.291	155	-16.58
EBV:158625-159918+	hsa-miR-4770	1	-0.114	-0.174	155	-17.59
EBV:146233-150348+	hsa-miR-4780	1			155	-33.31
EBV:146233-150348+	hsa-miR-4797-5p	1			155	-20.18
EBV:146233-150348+	hsa-miR-504-3p	1	-0.163	-0.14	155	-21.78
EBV:146233-150348+	hsa-miR-5693	1	-0.22	-0.182	155	-21.41
EBV:146233-150348+	hsa-miR-573	1	-0.076	-0.159	155	-11.35
EBV:158625-159918+	hsa-miR-580-3p	1	-0.084	-0.222	155	-14.13
EBV:146233-150348+	hsa-miR-629-5p	1		0.054	155	-20.16
EBV:158625-159918+	hsa-miR-6722-3p	1	-0.214	-0.167	155	-26.9
EBV:158625-159918+	hsa-miR-6752-3p	1	-0.07	0.016	155	-24.99
EBV:158625-159918+	hsa-miR-6778-5p	1		0.059	155	-32.85
EBV:146233-150348+	hsa-miR-6797-3p	1	-0.043	-0.043	155	-18.21
EBV:158625-159918+	hsa-miR-6838-3p	1	-0.057	-0.032	155	-22.44
EBV:158625-159918+	hsa-miR-6880-3p	1	-0.161	-0.025	155	-28.33
EBV:158625-159918+	hsa-miR-6886-5p	1	-0.188	-0.079	155	-20.9
EBV:156527-158751+	hsa-miR-6887-5p	1			155	-30.78
EBV:149581-150348+	hsa-miR-6893-3p	1	-0.112	-0.081	155	-24.27
EBV:156527-158751+	hsa-miR-6895-5p	1	-0.082	-0.039	155	-19.92
EBV:156527-158751+	hsa-miR-7157-3p	1			155	-25.53
EBV:146233-150348+	hsa-miR-891a-3p	1	-0.106	-0.056	155	-18.99
EBV:146233-150348+	hsa-miR-1227-5p	1	-0.054	-0.018	154	-30.92
EBV:156527-158751+	hsa-miR-1254	1	-0.137	-0.044	154	-26.6
EBV:146233-150348+	hsa-miR-1292-5p	1			154	-31.61
EBV:149581-150348+	hsa-miR-1292-5p	1			154	-31.61
EBV:158625-159918+	hsa-miR-143-3p	1	-0.095	-0.143	154	-17.39
EBV:156527-158751+	hsa-miR-181a-3p	1	-0.2	-0.128	154	-17.37
EBV:146233-150348+	hsa-miR-18a-3p	1			154	-27.6
EBV:158625-159918+	hsa-miR-1912	1	-0.218	-0.172	154	-20.16
EBV:146233-150348+	hsa-miR-193a-3p	1	-0.38	-0.242	154	-16.8
EBV:156527-158751+	hsa-miR-2277-5p	1	-0.4	-0.071	154	-25.45
EBV:158625-159918+	hsa-miR-362-3p	1	-0.148	-0.17	154	-17.45
EBV:146233-150348+	hsa-miR-3657	1	-0.077	-0.055	154	-19.52
EBV:156527-158751+	hsa-miR-3925-5p	1	-0.058	-0.158	154	-16.45
EBV:360-951+	hsa-miR-424-5p	1	-0.303	-0.207	154	-17.29
EBV:146233-150348+	hsa-miR-4449	1	-0.222	-0.057	154	-32.12
EBV:149581-150348+	hsa-miR-4449	1	-0.222	-0.057	154	-32.12
EBV:39902-40193-	hsa-miR-4449	1	-0.179	-0.009	154	-26.36
EBV:149581-150348+	hsa-miR-4639-5p	1	-0.096	-0.135	154	-17.68
EBV:146233-150348+	hsa-miR-4639-5p	1	-0.067	-0.121	154	-17.68
EBV:39902-40193-	hsa-miR-4651	1		0.02	154	-31.66
EBV:156527-158751+	hsa-miR-4655-5p	1	-0.203	-0.027	154	-33.12
EBV:146233-150348+	hsa-miR-4659b-3p	1			154	-21.98
EBV:149581-150348+	hsa-miR-4659b-3p	1			154	-21.98
EBV:360-951+	hsa-miR-466	1	-0.058	-0.151	154	-10.52
EBV:146233-150348+	hsa-miR-4712-3p	1	-0.088	-0.113	154	-11.77
EBV:39902-40193-	hsa-miR-4745-3p	1	-0.62	-0.271	154	-30.36
EBV:156527-158751+	hsa-miR-499a-3p	1	-0.07	-0.117	154	-17.29
EBV:146233-150348+	hsa-miR-509-3-5p	1	-0.013	-0.108	154	-17.86
EBV:149581-150348+	hsa-miR-5187-3p	1	-0.005	-0.039	154	-15.61
EBV:360-951+	hsa-miR-548aa	1		0.005	154	-18.22
EBV:360-951+	hsa-miR-548t-3p	1		0.005	154	-18.22
EBV:146233-150348+	hsa-miR-562	1	-0.149	-0.177	154	-16.23
EBV:146233-150348+	hsa-miR-5685	1	-0.166	-0.113	154	-23.37
EBV:158625-159918+	hsa-miR-588	1	-0.106	-0.065	154	-21.34
EBV:158625-159918+	hsa-miR-6069	1			154	-32.49
EBV:156527-158751+	hsa-miR-608	1	-0.201	-0.128	154	-28.05
EBV:158625-159918+	hsa-miR-6088	1	-0.077	-0.112	154	-25.35
EBV:146233-150348+	hsa-miR-6730-3p	1	-0.067	-0.092	154	-21.25
EBV:158625-159918+	hsa-miR-6749-5p	1	-0.248	-0.113	154	-26.43
EBV:156527-158751+	hsa-miR-6764-3p	1	-0.381	-0.335	154	-21.05
EBV:158625-159918+	hsa-miR-6765-5p	1		0.037	154	-33.82
EBV:146233-150348+	hsa-miR-6808-3p	1			154	-22.96
EBV:156527-158751+	hsa-miR-7850-5p	1	-0.147	-0.224	154	-18.37
EBV:39902-40193-	hsa-miR-874-5p	1	-0.388	-0.113	154	-27.24
EBV:158625-159918+	hsa-miR-10a-5p	1	-0.052	-0.011	153	-16.67
EBV:156527-158751+	hsa-miR-1229-5p	1	-0.146	-0.113	153	-22.92
EBV:360-951+	hsa-miR-1322	1	-0.104	-0.107	153	-15.56
EBV:146233-150348+	hsa-miR-1469	1			153	-34.66
EBV:158625-159918+	hsa-miR-1471	1			153	-32.66
EBV:156527-158751+	hsa-miR-148a-5p	1	-0.001	-0.075	153	-15.12
EBV:156527-158751+	hsa-miR-1911-3p	1	-0.107	-0.062	153	-21.19
EBV:146233-150348+	hsa-miR-2355-5p	1	-0.026	-0.091	153	-21.98
EBV:146233-150348+	hsa-miR-25-3p	1	-0.02	-0.056	153	-21.83
EBV:156527-158751+	hsa-miR-3192-5p	1	-0.033	-0.052	153	-25.71
EBV:39902-40193-	hsa-miR-3194-3p	1	-0.324	-0.227	153	-23.55
EBV:156527-158751+	hsa-miR-3691-3p	1	-0.071	-0.091	153	-20.4
EBV:146233-150348+	hsa-miR-378h	1	-0.227	-0.233	153	-20.11
EBV:146233-150348+	hsa-miR-412-3p	1			153	-25.71
EBV:146233-150348+	hsa-miR-4277	1	-0.115	-0.201	153	-17.75
EBV:39902-40193-	hsa-miR-4281	1	-0.121	0.012	153	-28.27
EBV:156527-158751+	hsa-miR-4447	1	-0.227	-0.172	153	-23.69
EBV:156527-158751+	hsa-miR-4476	1		-0.003	153	-25.17
EBV:360-951+	hsa-miR-4652-5p	1	-0.193	-0.133	153	-21.87
EBV:39902-40193-	hsa-miR-4691-5p	1			153	-26.57
EBV:39902-40193-	hsa-miR-4723-3p	1			153	-32.87
EBV:156527-158751+	hsa-miR-4738-3p	1	-0.09	-0.178	153	-19.53
EBV:39902-40193-	hsa-miR-4749-3p	1		0.056	153	-33.67
EBV:146233-150348+	hsa-miR-4763-5p	1	-0.325	-0.204	153	-22.64
EBV:146233-150348+	hsa-miR-483-5p	1			153	-26.52
EBV:156527-158751+	hsa-miR-5010-5p	1	-0.161	-0.074	153	-20.28
EBV:146233-150348+	hsa-miR-515-3p	1	-0.033	0.007	153	-19.75
EBV:146233-150348+	hsa-miR-519e-3p	1	-0.033	0.007	153	-17.38
EBV:146233-150348+	hsa-miR-548b-3p	1	-0.018	-0.059	153	-21.99
EBV:146233-150348+	hsa-miR-5585-5p	1	-0.08	-0.096	153	-12.53
EBV:146233-150348+	hsa-miR-5699-3p	1			153	-26.69
EBV:146233-150348+	hsa-miR-576-5p	1			153	-17.85
EBV:146233-150348+	hsa-miR-6090	1	0	0.023	153	-28.43
EBV:146233-150348+	hsa-miR-621	1	-0.176	-0.14	153	-15.26
EBV:156527-158751+	hsa-miR-624-3p	1			153	-16.69
EBV:146233-150348+	hsa-miR-663b	1	-0.076	-0.02	153	-29.07
EBV:146233-150348+	hsa-miR-6763-5p	1		0.096	153	-32.34
EBV:39902-40193-	hsa-miR-6764-5p	1	-0.078	0.012	153	-25.42
EBV:146233-150348+	hsa-miR-6770-3p	1	-0.534	-0.248	153	-23.46
EBV:156527-158751+	hsa-miR-6799-5p	1		0.014	153	-30.02
EBV:158625-159918+	hsa-miR-6804-5p	1	-0.024	0.033	153	-25.09
EBV:156527-158751+	hsa-miR-6824-3p	1	-0.318	-0.322	153	-17.37
EBV:158625-159918+	hsa-miR-6825-3p	1	-0.108	0.007	153	-23.5
EBV:146233-150348+	hsa-miR-6834-3p	1		0.041	153	-25.66
EBV:156527-158751+	hsa-miR-6843-3p	1	-0.167	-0.165	153	-18.66
EBV:158625-159918+	hsa-miR-6846-5p	1	-0.16	-0.076	153	-27.82
EBV:158625-159918+	hsa-miR-6859-5p	1	-0.101	-0.155	153	-20.31
EBV:39902-40193-	hsa-miR-6862-3p	1			153	-27.91
EBV:360-951+	hsa-miR-6868-3p	1	-0.087	-0.125	153	-20.19
EBV:146233-150348+	hsa-miR-7112-5p	1	-0.182	-0.072	153	-24.96
EBV:158625-159918+	hsa-miR-7154-3p	1	-0.059	-0.007	153	-22.59
EBV:158625-159918+	hsa-miR-766-3p	1	-0.286	-0.19	153	-20.17
EBV:360-951+	hsa-miR-8063	1	-0.007	-0.137	153	-18.22
EBV:156527-158751+	hsa-let-7i-5p	1			152	-21.4
EBV:156527-158751+	hsa-miR-10a-5p	1	-0.038	0.022	152	-25.04
EBV:158625-159918+	hsa-miR-1184	1			152	-27.49
EBV:158625-159918+	hsa-miR-1207-5p	1	-0.228	-0.207	152	-26.43
EBV:158625-159918+	hsa-miR-1247-5p	1	-0.109	0.073	152	-31.86
EBV:146233-150348+	hsa-miR-1247-5p	1			152	-28.55
EBV:158625-159918+	hsa-miR-1285-3p	1			152	-35.78
EBV:158625-159918+	hsa-miR-1295b-5p	1	-0.218	-0.172	152	-21.65
EBV:146233-150348+	hsa-miR-1295b-5p	1	-0.023	0.004	152	-22.3
EBV:39902-40193-	hsa-miR-1343-3p	1			152	-30.06
EBV:39902-40193-	hsa-miR-1915-3p	1	-0.087	-0.004	152	-31.59
EBV:146233-150348+	hsa-miR-22-5p	1			152	-17.47
EBV:156527-158751+	hsa-miR-24-1-5p	1	-0.063	-0.018	152	-21.81
EBV:156527-158751+	hsa-miR-3134	1	-0.148	-0.19	152	-15.99
EBV:146233-150348+	hsa-miR-3157-5p	1		0.04	152	-27.5
EBV:39902-40193-	hsa-miR-3173-5p	1			152	-25.6
EBV:146233-150348+	hsa-miR-33a-3p	1		0.071	152	-13.11
EBV:158625-159918+	hsa-miR-3679-3p	1	-0.221	-0.12	152	-21.23
EBV:146233-150348+	hsa-miR-3682-5p	1			152	-25
EBV:156527-158751+	hsa-miR-3921	1			152	-22.43
EBV:158625-159918+	hsa-miR-4260	1		0.061	152	-30.09
EBV:146233-150348+	hsa-miR-4268	1	-0.006	-0.007	152	-22.86
EBV:146233-150348+	hsa-miR-4276	1	-0.109	-0.171	152	-15.7
EBV:146233-150348+	hsa-miR-4301	1	-0.068	-0.056	152	-17.72
EBV:146233-150348+	hsa-miR-4462	1	-0.123	-0.123	152	-25.29
EBV:156527-158751+	hsa-miR-4468	1	-0.034	-0.06	152	-17.78
EBV:158625-159918+	hsa-miR-4477b	1	-0.222	-0.344	152	-10.5
EBV:146233-150348+	hsa-miR-4511	1		0.024	152	-19.13
EBV:156527-158751+	hsa-miR-4524a-5p	1	-0.351	-0.269	152	-17.59
EBV:158625-159918+	hsa-miR-4537	1	-0.139	-0.042	152	-24.39
EBV:39902-40193-	hsa-miR-4632-3p	1			152	-33.57
EBV:149581-150348+	hsa-miR-4725-3p	1	-0.118	-0.076	152	-30.59
EBV:146233-150348+	hsa-miR-4725-3p	1	-0.027	-0.017	152	-30.59
EBV:158625-159918+	hsa-miR-4731-5p	1	-0.059	0.016	152	-24.54
EBV:146233-150348+	hsa-miR-4734	1		0.074	152	-32.81
EBV:149581-150348+	hsa-miR-4747-5p	1	-0.165	-0.156	152	-20.69
EBV:146233-150348+	hsa-miR-4758-5p	1		0.04	152	-33.5
EBV:156527-158751+	hsa-miR-548s	1	-0.115	-0.142	152	-19.21
EBV:146233-150348+	hsa-miR-5591-3p	1	-0.162	-0.189	152	-19.46
EBV:158625-159918+	hsa-miR-583	1	-0.071	-0.128	152	-12.79
EBV:146233-150348+	hsa-miR-6132	1	-0.043	-0.013	152	-22.77
EBV:158625-159918+	hsa-miR-6722-5p	1	-0.238	-0.078	152	-23.49
EBV:158625-159918+	hsa-miR-6735-5p	1	-0.161	-0.128	152	-23.71
EBV:158625-159918+	hsa-miR-6752-5p	1	-0.214	-0.14	152	-27.67
EBV:156527-158751+	hsa-miR-6759-3p	1		0.025	152	-18.52
EBV:39902-40193-	hsa-miR-6766-5p	1	-0.35	-0.207	152	-20.96
EBV:158625-159918+	hsa-miR-6767-3p	1			152	-27.08
EBV:39902-40193-	hsa-miR-6769b-5p	1	-0.089	-0.002	152	-23.06
EBV:39902-40193-	hsa-miR-6774-3p	1			152	-25.77
EBV:146233-150348+	hsa-miR-6786-5p	1	-0.444	-0.168	152	-26.16
EBV:146233-150348+	hsa-miR-6797-5p	1			152	-26.69
EBV:146233-150348+	hsa-miR-6822-5p	1	-0.012	-0.066	152	-22.9
EBV:149581-150348+	hsa-miR-6840-3p	1		-0.018	152	-27.11
EBV:39902-40193-	hsa-miR-6887-3p	1	-0.126	-0.042	152	-28.51
EBV:149581-150348+	hsa-miR-7-5p	1	-0.137	-0.145	152	-19.23
EBV:146233-150348+	hsa-miR-7-5p	1	-0.115	-0.13	152	-19.23
EBV:158625-159918+	hsa-miR-7847-3p	1	-0.1	-0.053	152	-27.13
EBV:146233-150348+	hsa-miR-92b-3p	1	-0.03	-0.071	152	-18.61
EBV:158625-159918+	hsa-miR-1182	1	-0.032	0.035	151	-23.29
EBV:146233-150348+	hsa-miR-1206	1	-0.09	-0.129	151	-14.3
EBV:158625-159918+	hsa-miR-1228-3p	1	-0.152	-0.185	151	-20.15
EBV:156527-158751+	hsa-miR-1245b-5p	1			151	-21.83
EBV:156527-158751+	hsa-miR-1247-3p	1	-0.078	0.01	151	-33.87
EBV:39902-40193-	hsa-miR-1254	1	-0.166	-0.114	151	-23.71
EBV:146233-150348+	hsa-miR-1264	1			151	-16.6
EBV:360-951+	hsa-miR-1301-3p	1			151	-26.79
EBV:146233-150348+	hsa-miR-181c-5p	1	-0.028	-0.164	151	-16.36
EBV:156527-158751+	hsa-miR-1827	1	-0.095	-0.126	151	-13.14
EBV:146233-150348+	hsa-miR-1912	1	-0.014	0.019	151	-20.22
EBV:156527-158751+	hsa-miR-196b-3p	1		-0.032	151	-22.65
EBV:146233-150348+	hsa-miR-19a-5p	1			151	-20.88
EBV:146233-150348+	hsa-miR-21-3p	1	-0.014	-0.044	151	-18.02
EBV:158625-159918+	hsa-miR-3125	1	-0.082	-0.124	151	-19.53
EBV:146233-150348+	hsa-miR-3142	1	-0.02	-0.024	151	-14.81
EBV:360-951+	hsa-miR-3182	1	-0.115	-0.184	151	-15.05
EBV:156527-158751+	hsa-miR-338-3p	1	-0.096	-0.132	151	-17.31
EBV:360-951+	hsa-miR-34a-5p	1	-0.074	-0.02	151	-27.69
EBV:158625-159918+	hsa-miR-3663-3p	1	-0.115	-0.063	151	-26.2
EBV:158625-159918+	hsa-miR-3667-3p	1		0.023	151	-28.33
EBV:146233-150348+	hsa-miR-3685	1			151	-29.85
EBV:156527-158751+	hsa-miR-379-5p	1			151	-18.73
EBV:158625-159918+	hsa-miR-4421	1			151	-23.51
EBV:146233-150348+	hsa-miR-4488	1	-0.036	0.032	151	-28.46
EBV:39902-40193-	hsa-miR-4492	1	-0.095	-0.007	151	-26.24
EBV:146233-150348+	hsa-miR-452-3p	1	-0.205	-0.332	151	-9.68
EBV:158625-159918+	hsa-miR-4651	1	-0.206	-0.144	151	-24.17
EBV:146233-150348+	hsa-miR-4676-3p	1	-0.019	-0.199	151	-13.82
EBV:156527-158751+	hsa-miR-4677-5p	1			151	-15.6
EBV:156527-158751+	hsa-miR-4715-3p	1	-0.34	-0.201	151	-25.18
EBV:156527-158751+	hsa-miR-4715-5p	1		0.062	151	-19.68
EBV:156527-158751+	hsa-miR-4725-5p	1		0.018	151	-25.03
EBV:146233-150348+	hsa-miR-4771	1	-0.002	-0.039	151	-13.47
EBV:158625-159918+	hsa-miR-4774-5p	1			151	-18.88
EBV:146233-150348+	hsa-miR-492	1	-0.106	-0.066	151	-18.39
EBV:360-951+	hsa-miR-497-3p	1	-0.073	-0.12	151	-13.86
EBV:146233-150348+	hsa-miR-5006-5p	1	-0.088	-0.025	151	-24.08
EBV:146233-150348+	hsa-miR-500b-3p	1	-0.104	-0.106	151	-24.37
EBV:158625-159918+	hsa-miR-519d-5p	1	-0.088	-0.156	151	-19.77
EBV:360-951+	hsa-miR-532-5p	1	-0.143	-0.148	151	-18.59
EBV:146233-150348+	hsa-miR-545-3p	1	-0.07	-0.171	151	-12.83
EBV:146233-150348+	hsa-miR-564	1	-0.224	-0.081	151	-23.45
EBV:146233-150348+	hsa-miR-588	1	-0.177	-0.129	151	-17.78
EBV:146233-150348+	hsa-miR-6081	1	-0.007	-0.052	151	-25.75
EBV:156527-158751+	hsa-miR-6087	1	-0.042	0.036	151	-27.4
EBV:146233-150348+	hsa-miR-615-3p	1		0.025	151	-26.65
EBV:146233-150348+	hsa-miR-647	1	-0.066	-0.054	151	-19.6
EBV:158625-159918+	hsa-miR-653-3p	1	-0.027	-0.024	151	-16.83
EBV:156527-158751+	hsa-miR-658	1	-0.236	-0.171	151	-22.28
EBV:149581-150348+	hsa-miR-670-3p	1	-0.132	-0.19	151	-14.16
EBV:146233-150348+	hsa-miR-670-3p	1	-0.106	-0.174	151	-14.16
EBV:156527-158751+	hsa-miR-6720-3p	1	-0.133	-0.022	151	-16.55
EBV:158625-159918+	hsa-miR-6720-5p	1	-0.159	-0.103	151	-24.7
EBV:39902-40193-	hsa-miR-6723-5p	1	-0.165	-0.081	151	-20.76
EBV:156527-158751+	hsa-miR-675-5p	1			151	-29.1
EBV:146233-150348+	hsa-miR-6754-5p	1		0.061	151	-27.61
EBV:146233-150348+	hsa-miR-676-5p	1	-0.09	-0.172	151	-15.4
EBV:149581-150348+	hsa-miR-676-5p	1	-0.087	-0.155	151	-15.4
EBV:156527-158751+	hsa-miR-6778-3p	1	-0.375	-0.301	151	-21.82
EBV:158625-159918+	hsa-miR-6784-5p	1	-0.254	-0.065	151	-28.25
EBV:158625-159918+	hsa-miR-6798-5p	1	-0.245	-0.177	151	-25.7
EBV:39902-40193-	hsa-miR-6810-3p	1		0.037	151	-34.58
EBV:39902-40193-	hsa-miR-6826-3p	1		0.058	151	-30.44
EBV:146233-150348+	hsa-miR-6864-3p	1	-0.111	-0.139	151	-15.25
EBV:156527-158751+	hsa-miR-6874-5p	1	-0.103	-0.07	151	-18.15
EBV:146233-150348+	hsa-miR-6890-5p	1	-0.299	-0.228	151	-20.56
EBV:146233-150348+	hsa-miR-1184	1	-0.077	-0.143	150	-13.2
EBV:156527-158751+	hsa-miR-1256	1	-0.057	-0.062	150	-15.38
EBV:158625-159918+	hsa-miR-125a-5p	1	-0.099	-0.087	150	-24.38
EBV:156527-158751+	hsa-miR-1273g-5p	1	-0.107	-0.122	150	-19.48
EBV:146233-150348+	hsa-miR-1289	1			150	-24.27
EBV:39902-40193-	hsa-miR-152-5p	1	-0.217	-0.125	150	-15.44
EBV:156527-158751+	hsa-miR-187-5p	1	-0.176	-0.18	150	-19.06
EBV:158625-159918+	hsa-miR-2113	1			150	-20.89
EBV:158625-159918+	hsa-miR-3130-3p	1	-0.232	-0.207	150	-17.79
EBV:158625-159918+	hsa-miR-337-5p	1			150	-19.95
EBV:156527-158751+	hsa-miR-3529-5p	1			150	-25.07
EBV:158625-159918+	hsa-miR-361-3p	1	-0.197	-0.13	150	-25.63
EBV:146233-150348+	hsa-miR-3670	1			150	-31.38
EBV:146233-150348+	hsa-miR-3680-5p	1		0.104	150	-30.51
EBV:146233-150348+	hsa-miR-3681-5p	1		-0.017	150	-21.8
EBV:156527-158751+	hsa-miR-3689d	1	-0.124	-0.108	150	-20.2
EBV:146233-150348+	hsa-miR-3691-3p	1			150	-23.97
EBV:156527-158751+	hsa-miR-374b-3p	1	-0.179	-0.21	150	-13.09
EBV:156527-158751+	hsa-miR-4292	1	-0.147	-0.039	150	-23.61
EBV:156527-158751+	hsa-miR-4297	1	-0.084	-0.058	150	-16.78
EBV:158625-159918+	hsa-miR-4431	1	-0.184	-0.086	150	-20.04
EBV:146233-150348+	hsa-miR-4448	1			150	-26.81
EBV:156527-158751+	hsa-miR-4480	1	-0.084	-0.081	150	-15.09
EBV:158625-159918+	hsa-miR-4525	1		0.039	150	-35.07
EBV:156527-158751+	hsa-miR-455-3p	1	-0.299	-0.251	150	-17.01
EBV:156527-158751+	hsa-miR-4659b-3p	1			150	-20.77
EBV:149581-150348+	hsa-miR-4663	1			150	-31.32
EBV:146233-150348+	hsa-miR-4671-3p	1		0.009	150	-22.06
EBV:146233-150348+	hsa-miR-4685-3p	1		0.06	150	-26.55
EBV:156527-158751+	hsa-miR-4691-3p	1	-0.112	-0.054	150	-29.88
EBV:158625-159918+	hsa-miR-4691-3p	1	-0.111	-0.054	150	-29.88
EBV:149581-150348+	hsa-miR-4714-5p	1	-0.086	-0.085	150	-18.51
EBV:146233-150348+	hsa-miR-4714-5p	1	-0.053	-0.064	150	-18.51
EBV:156527-158751+	hsa-miR-4750-3p	1	-0.112	-0.018	150	-16.93
EBV:156527-158751+	hsa-miR-4763-3p	1			150	-34.13
EBV:146233-150348+	hsa-miR-4778-5p	1			150	-16.1
EBV:158625-159918+	hsa-miR-4787-3p	1		0.049	150	-29.45
EBV:156527-158751+	hsa-miR-483-5p	1		-0.048	150	-25.21
EBV:156527-158751+	hsa-miR-487b-5p	1	-0.082	-0.13	150	-14.55
EBV:158625-159918+	hsa-miR-498	1		0.054	150	-25.19
EBV:39902-40193-	hsa-miR-5001-5p	1	-0.095	-0.007	150	-26.69
EBV:146233-150348+	hsa-miR-5196-3p	1			150	-30.92
EBV:360-951+	hsa-miR-5197-3p	1	-0.157	-0.216	150	-9.87
EBV:156527-158751+	hsa-miR-519a-3p	1	-0.003	-0.059	150	-17.11
EBV:156527-158751+	hsa-miR-519b-3p	1	-0.003	-0.059	150	-17.65
EBV:156527-158751+	hsa-miR-519c-3p	1	-0.003	-0.059	150	-17.28
EBV:156527-158751+	hsa-miR-549a	1		0.023	150	-26.15
EBV:158625-159918+	hsa-miR-5588-5p	1	-0.062	-0.056	150	-18.87
EBV:360-951+	hsa-miR-575	1	-0.198	-0.189	150	-21.36
EBV:360-951+	hsa-miR-595	1	-0.261	-0.302	150	-15.74
EBV:146233-150348+	hsa-miR-6089	1		0.094	150	-46.61
EBV:146233-150348+	hsa-miR-613	1			150	-22.21
EBV:156527-158751+	hsa-miR-613	1			150	-17.91
EBV:158625-159918+	hsa-miR-617	1	-0.16	-0.155	150	-22.3
EBV:156527-158751+	hsa-miR-622	1	-0.091	-0.099	150	-19.33
EBV:156527-158751+	hsa-miR-625-5p	1	-0.33	-0.226	150	-20.33
EBV:156527-158751+	hsa-miR-635	1			150	-26.22
EBV:39902-40193-	hsa-miR-639	1	-0.245	-0.1	150	-20.05
EBV:146233-150348+	hsa-miR-6727-5p	1		0.084	150	-38.8
EBV:158625-159918+	hsa-miR-6732-5p	1	-0.174	-0.08	150	-23.79
EBV:158625-159918+	hsa-miR-6736-3p	1	-0.146	-0.098	150	-17.38
EBV:146233-150348+	hsa-miR-6752-3p	1	-0.298	-0.13	150	-26
EBV:156527-158751+	hsa-miR-6758-3p	1	-0.065	-0.109	150	-15.57
EBV:158625-159918+	hsa-miR-6763-3p	1		0.045	150	-39.89
EBV:156527-158751+	hsa-miR-6769a-3p	1	-0.189	-0.138	150	-16.7
EBV:156527-158751+	hsa-miR-6770-3p	1	-0.171	-0.038	150	-21.47
EBV:146233-150348+	hsa-miR-6771-3p	1		-0.016	150	-27.68
EBV:39902-40193-	hsa-miR-6772-3p	1		0.063	150	-25.08
EBV:39902-40193-	hsa-miR-6776-5p	1	-0.096	-0.047	150	-23.77
EBV:156527-158751+	hsa-miR-6785-5p	1		-0.014	150	-31.16
EBV:39902-40193-	hsa-miR-6786-5p	1			150	-33.99
EBV:360-951+	hsa-miR-6787-3p	1	-0.09	-0.085	150	-18.71
EBV:146233-150348+	hsa-miR-6791-3p	1	-0.123	0.016	150	-31.98
EBV:158625-159918+	hsa-miR-6812-3p	1		0.068	150	-27.05
EBV:146233-150348+	hsa-miR-6819-5p	1	-0.214	-0.186	150	-24.89
EBV:146233-150348+	hsa-miR-6835-5p	1			150	-28.78
EBV:39902-40193-	hsa-miR-6846-5p	1	-0.326	-0.08	150	-32.1
EBV:158625-159918+	hsa-miR-6856-5p	1			150	-26.21
EBV:156527-158751+	hsa-miR-6865-3p	1	-0.055	-0.047	150	-30.11
EBV:158625-159918+	hsa-miR-7109-5p	1	-0.158	-0.062	150	-27.77
EBV:146233-150348+	hsa-miR-7156-3p	1	-0.211	-0.156	150	-20.05
EBV:158625-159918+	hsa-miR-8072	1	-0.561	-0.189	150	-28.06
EBV:146233-150348+	hsa-miR-8485	1	-0.099	-0.166	150	-12.64
EBV:146233-150348+	hsa-miR-105-3p	1			149	-19.79
EBV:146233-150348+	hsa-miR-1237-5p	1	-0.045	0.017	149	-26.37
EBV:156527-158751+	hsa-miR-1246	1			149	-19.14
EBV:158625-159918+	hsa-miR-1247-3p	1	-0.346	-0.086	149	-28.89
EBV:156527-158751+	hsa-miR-1273h-3p	1	-0.1	-0.108	149	-18.61
EBV:39902-40193-	hsa-miR-1282	1			149	-22.68
EBV:146233-150348+	hsa-miR-1295b-3p	1	-0.006	-0.009	149	-19.78
EBV:158625-159918+	hsa-miR-1301-3p	1			149	-27.91
EBV:156527-158751+	hsa-miR-1306-5p	1	-0.19	-0.18	149	-20.12
EBV:360-951+	hsa-miR-140-3p	1	-0.198	-0.21	149	-21.66
EBV:146233-150348+	hsa-miR-181c-3p	1		-0.002	149	-28.43
EBV:158625-159918+	hsa-miR-1908-5p	1	-0.256	-0.092	149	-28.36
EBV:360-951+	hsa-miR-192-3p	1	-0.136	-0.158	149	-15.95
EBV:146233-150348+	hsa-miR-193b-3p	1	-0.38	-0.242	149	-15.14
EBV:156527-158751+	hsa-miR-1972	1	-0.057	-0.031	149	-23.08
EBV:146233-150348+	hsa-miR-1976	1	-0.067	-0.056	149	-16.7
EBV:146233-150348+	hsa-miR-2861	1		0.099	149	-34.33
EBV:360-951+	hsa-miR-3120-3p	1		-0.004	149	-22.68
EBV:156527-158751+	hsa-miR-3136-5p	1	-0.029	-0.07	149	-17.44
EBV:156527-158751+	hsa-miR-3190-5p	1	-0.063	-0.02	149	-20.94
EBV:158625-159918+	hsa-miR-3191-3p	1	-0.148	-0.059	149	-22.48
EBV:39902-40193-	hsa-miR-326	1	-0.09	-0.04	149	-21.96
EBV:158625-159918+	hsa-miR-328-3p	1	-0.057	0.024	149	-17.76
EBV:146233-150348+	hsa-miR-345-3p	1		0.047	149	-31.3
EBV:158625-159918+	hsa-miR-3622a-5p	1		0.051	149	-32.15
EBV:146233-150348+	hsa-miR-365a-5p	1			149	-23.28
EBV:149581-150348+	hsa-miR-3692-5p	1	-0.076	-0.029	149	-24.19
EBV:146233-150348+	hsa-miR-3692-5p	1	-0.034	-0.021	149	-24.19
EBV:360-951+	hsa-miR-373-5p	1			149	-21.17
EBV:360-951+	hsa-miR-424-3p	1			149	-20.02
EBV:156527-158751+	hsa-miR-4305	1			149	-21.63
EBV:158625-159918+	hsa-miR-4443	1	-0.077	0.018	149	-18.83
EBV:149581-150348+	hsa-miR-4479	1			149	-37.2
EBV:146233-150348+	hsa-miR-4490	1	-0.13	-0.173	149	-18.18
EBV:146233-150348+	hsa-miR-4494	1			149	-25.53
EBV:39902-40193-	hsa-miR-4525	1		0.022	149	-27.96
EBV:158625-159918+	hsa-miR-4540	1		0.05	149	-23.59
EBV:156527-158751+	hsa-miR-4701-5p	1	-0.083	-0.018	149	-21.84
EBV:158625-159918+	hsa-miR-4758-3p	1	-0.269	-0.129	149	-24.18
EBV:156527-158751+	hsa-miR-4798-3p	1	-0.26	-0.154	149	-14.34
EBV:156527-158751+	hsa-miR-487a-5p	1	-0.082	-0.13	149	-17.95
EBV:149581-150348+	hsa-miR-5000-3p	1	-0.165	-0.168	149	-14.98
EBV:156527-158751+	hsa-miR-5000-3p	1	-0.05	-0.078	149	-21.13
EBV:146233-150348+	hsa-miR-5047	1	-0.275	-0.202	149	-21.05
EBV:146233-150348+	hsa-miR-524-5p	1		-0.021	149	-20.17
EBV:156527-158751+	hsa-miR-541-5p	1	-0.026	-0.095	149	-12.03
EBV:156527-158751+	hsa-miR-543	1	-0.064	-0.193	149	-10.94
EBV:158625-159918+	hsa-miR-550b-2-5p	1	-0.014	0.044	149	-17.14
EBV:158625-159918+	hsa-miR-605-3p	1	-0.109	-0.144	149	-14.88
EBV:156527-158751+	hsa-miR-6499-5p	1			149	-26.12
EBV:156527-158751+	hsa-miR-6507-5p	1			149	-18.88
EBV:360-951+	hsa-miR-665	1			149	-32.14
EBV:156527-158751+	hsa-miR-6737-5p	1		0.018	149	-30.28
EBV:158625-159918+	hsa-miR-6747-3p	1	-0.194	-0.107	149	-22.86
EBV:39902-40193-	hsa-miR-675-5p	1	-0.293	-0.169	149	-30.98
EBV:146233-150348+	hsa-miR-6756-3p	1			149	-29.74
EBV:156527-158751+	hsa-miR-6776-3p	1	-0.073	-0.084	149	-23.37
EBV:158625-159918+	hsa-miR-6805-5p	1			149	-29.11
EBV:360-951+	hsa-miR-6810-5p	1			149	-25.18
EBV:360-951+	hsa-miR-6827-3p	1			149	-19.83
EBV:146233-150348+	hsa-miR-6842-5p	1		0.026	149	-27.37
EBV:158625-159918+	hsa-miR-6845-5p	1	-0.146	-0.018	149	-25.06
EBV:360-951+	hsa-miR-6847-5p	1	-0.093	-0.095	149	-20.8
EBV:156527-158751+	hsa-miR-6867-5p	1			149	-23.4
EBV:146233-150348+	hsa-miR-6877-3p	1		0.027	149	-34.35
EBV:149581-150348+	hsa-miR-6877-3p	1		0.027	149	-34.35
EBV:156527-158751+	hsa-miR-6885-3p	1			149	-16.77
EBV:146233-150348+	hsa-miR-6892-3p	1	-0.151	-0.141	149	-21.26
EBV:158625-159918+	hsa-miR-6892-3p	1	-0.018	0.05	149	-16.33
EBV:158625-159918+	hsa-miR-7160-5p	1			149	-34.96
EBV:156527-158751+	hsa-miR-769-5p	1	-0.004	-0.005	149	-22.96
EBV:156527-158751+	hsa-miR-7845-5p	1	-0.05	-0.032	149	-23.55
EBV:156527-158751+	hsa-miR-7852-3p	1			149	-18.43
EBV:146233-150348+	hsa-miR-874-3p	1			149	-31.23
EBV:146233-150348+	hsa-miR-92a-3p	1	-0.02	-0.056	149	-20.09
EBV:146233-150348+	hsa-miR-101-5p	1			148	-17.78
EBV:156527-158751+	hsa-miR-10b-5p	1	-0.031	0.025	148	-24.41
EBV:39902-40193-	hsa-miR-1229-3p	1			148	-36.38
EBV:156527-158751+	hsa-miR-1267	1	-0.107	-0.139	148	-17.55
EBV:158625-159918+	hsa-miR-1288-3p	1	-0.075	0.034	148	-20.72
EBV:39902-40193-	hsa-miR-1538	1	-0.568	-0.261	148	-23.26
EBV:156527-158751+	hsa-miR-1587	1	-0.187	-0.154	148	-18.97
EBV:360-951+	hsa-miR-16-5p	1	-0.25	-0.197	148	-19.96
EBV:156527-158751+	hsa-miR-212-5p	1			148	-25.53
EBV:146233-150348+	hsa-miR-219a-2-3p	1	-0.174	-0.269	148	-12.42
EBV:156527-158751+	hsa-miR-23a-5p	1			148	-30.73
EBV:158625-159918+	hsa-miR-3197	1	-0.282	-0.149	148	-33.28
EBV:146233-150348+	hsa-miR-324-3p	1	-0.173	-0.104	148	-27.37
EBV:156527-158751+	hsa-miR-3605-3p	1	-0.219	-0.125	148	-17.55
EBV:146233-150348+	hsa-miR-3612	1	-0.31	-0.167	148	-16.2
EBV:149581-150348+	hsa-miR-3648	1	-0.398	-0.182	148	-31.12
EBV:146233-150348+	hsa-miR-3648	1	-0.298	-0.118	148	-31.12
EBV:146233-150348+	hsa-miR-3658	1			148	-19.71
EBV:146233-150348+	hsa-miR-3679-3p	1	-0.001	-0.022	148	-16.73
EBV:146233-150348+	hsa-miR-3686	1		-0.009	148	-19.17
EBV:146233-150348+	hsa-miR-378d	1	-0.217	-0.218	148	-15.83
EBV:146233-150348+	hsa-miR-378e	1	-0.217	-0.218	148	-15.83
EBV:146233-150348+	hsa-miR-3941	1		-0.032	148	-16.37
EBV:156527-158751+	hsa-miR-3944-3p	1			148	-24.49
EBV:156527-158751+	hsa-miR-4304	1	-0.208	-0.072	148	-14.96
EBV:156527-158751+	hsa-miR-4462	1		-0.012	148	-26.87
EBV:158625-159918+	hsa-miR-4488	1	-0.373	-0.166	148	-22.75
EBV:156527-158751+	hsa-miR-4488	1			148	-26.04
EBV:156527-158751+	hsa-miR-4496	1	-0.074	-0.185	148	-21.61
EBV:39902-40193-	hsa-miR-4507	1			148	-36.19
EBV:146233-150348+	hsa-miR-452-5p	1	-0.009	-0.197	148	-13.82
EBV:146233-150348+	hsa-miR-4638-5p	1	-0.03	0.034	148	-18.5
EBV:156527-158751+	hsa-miR-4651	1	-0.192	-0.112	148	-24.15
EBV:156527-158751+	hsa-miR-4663	1			148	-27.48
EBV:360-951+	hsa-miR-4684-3p	1			148	-26.44
EBV:146233-150348+	hsa-miR-4684-5p	1			148	-19.06
EBV:146233-150348+	hsa-miR-4712-5p	1	-0.237	-0.272	148	-16.98
EBV:360-951+	hsa-miR-4728-5p	1		-0.014	148	-26.56
EBV:156527-158751+	hsa-miR-4730	1			148	-31.76
EBV:158625-159918+	hsa-miR-4743-5p	1		0.069	148	-34.84
EBV:146233-150348+	hsa-miR-4783-3p	1		0.045	148	-23.91
EBV:146233-150348+	hsa-miR-484	1			148	-29.36
EBV:158625-159918+	hsa-miR-500b-3p	1	-0.017	0.007	148	-17.62
EBV:146233-150348+	hsa-miR-508-5p	1	-0.014	-0.05	148	-20.34
EBV:156527-158751+	hsa-miR-5087	1	-0.112	-0.152	148	-22.33
EBV:156527-158751+	hsa-miR-5093	1	-0.072	-0.214	148	-13.4
EBV:360-951+	hsa-miR-512-5p	1	-0.138	-0.122	148	-13.38
EBV:156527-158751+	hsa-miR-513a-3p	1			148	-16.16
EBV:156527-158751+	hsa-miR-513c-3p	1			148	-14.27
EBV:360-951+	hsa-miR-5190	1	-0.315	-0.306	148	-20.88
EBV:146233-150348+	hsa-miR-561-5p	1			148	-21.53
EBV:146233-150348+	hsa-miR-591	1	-0.107	-0.13	148	-16.11
EBV:156527-158751+	hsa-miR-6081	1	-0.194	-0.152	148	-18.7
EBV:146233-150348+	hsa-miR-612	1			148	-26.27
EBV:156527-158751+	hsa-miR-615-5p	1		0.038	148	-31.7
EBV:158625-159918+	hsa-miR-6516-3p	1			148	-20.55
EBV:39902-40193-	hsa-miR-671-3p	1	-0.179	-0.032	148	-24.95
EBV:360-951+	hsa-miR-6717-5p	1			148	-18.8
EBV:156527-158751+	hsa-miR-6739-5p	1		-0.023	148	-14.18
EBV:146233-150348+	hsa-miR-6741-3p	1		0.034	148	-24.66
EBV:39902-40193-	hsa-miR-6748-5p	1	-0.102	-0.037	148	-22.81
EBV:39902-40193-	hsa-miR-6756-3p	1			148	-32.32
EBV:39902-40193-	hsa-miR-6769a-5p	1	-0.089	-0.002	148	-21.48
EBV:158625-159918+	hsa-miR-6782-5p	1		-0.011	148	-27.17
EBV:156527-158751+	hsa-miR-6786-3p	1	-0.456	-0.161	148	-21.02
EBV:146233-150348+	hsa-miR-6804-3p	1	-0.131	-0.141	148	-27.21
EBV:158625-159918+	hsa-miR-6816-5p	1	-0.285	-0.164	148	-27.93
EBV:156527-158751+	hsa-miR-6818-3p	1			148	-17.83
EBV:158625-159918+	hsa-miR-6818-3p	1			148	-17.83
EBV:146233-150348+	hsa-miR-6830-3p	1			148	-20.3
EBV:146233-150348+	hsa-miR-6837-3p	1			148	-18.38
EBV:156527-158751+	hsa-miR-6882-3p	1			148	-27.01
EBV:146233-150348+	hsa-miR-6883-5p	1			148	-28.81
EBV:149581-150348+	hsa-miR-6883-5p	1			148	-28.81
EBV:158625-159918+	hsa-miR-6894-3p	1	-0.084	-0.019	148	-13.81
EBV:146233-150348+	hsa-miR-708-3p	1		0.021	148	-18.06
EBV:146233-150348+	hsa-miR-758-3p	1	-0.108	-0.168	148	-14.65
EBV:158625-159918+	hsa-miR-762	1		0.079	148	-35.39
EBV:146233-150348+	hsa-miR-770-5p	1	-0.258	-0.276	148	-23.61
EBV:158625-159918+	hsa-miR-892a	1			148	-23.38
EBV:156527-158751+	hsa-miR-939-3p	1	-0.043	-0.021	148	-29.85
EBV:146233-150348+	hsa-let-7g-3p	1	-0.065	-0.167	147	-13.77
EBV:146233-150348+	hsa-miR-10a-3p	1		0.01	147	-19.77
EBV:156527-158751+	hsa-miR-1199-3p	1			147	-25.43
EBV:146233-150348+	hsa-miR-1207-3p	1	-0.157	-0.14	147	-13.03
EBV:158625-159918+	hsa-miR-1207-3p	1		0.053	147	-21.19
EBV:158625-159918+	hsa-miR-1233-5p	1		0.063	147	-31.96
EBV:39902-40193-	hsa-miR-1247-3p	1	-0.36	-0.073	147	-25.88
EBV:156527-158751+	hsa-miR-1251-5p	1	-0.064	-0.07	147	-16.07
EBV:158625-159918+	hsa-miR-125b-5p	1	-0.108	-0.103	147	-20.63
EBV:360-951+	hsa-miR-132-3p	1	-0.139	-0.182	147	-20.05
EBV:158625-159918+	hsa-miR-1343-5p	1		0.017	147	-31.45
EBV:158625-159918+	hsa-miR-149-3p	1			147	-29.19
EBV:156527-158751+	hsa-miR-222-5p	1			147	-27.53
EBV:156527-158751+	hsa-miR-223-3p	1	-0.027	0.024	147	-19.65
EBV:146233-150348+	hsa-miR-2276-3p	1		0.066	147	-16.89
EBV:156527-158751+	hsa-miR-23b-5p	1			147	-27.42
EBV:156527-158751+	hsa-miR-297	1	-0.012	-0.065	147	-15.81
EBV:146233-150348+	hsa-miR-300	1			147	-20.78
EBV:149581-150348+	hsa-miR-301a-5p	1	-0.129	-0.133	147	-17.89
EBV:146233-150348+	hsa-miR-301a-5p	1	-0.096	-0.112	147	-17.89
EBV:156527-158751+	hsa-miR-301a-5p	1			147	-20.84
EBV:156527-158751+	hsa-miR-3128	1	-0.096	-0.137	147	-17.34
EBV:156527-158751+	hsa-miR-3150b-3p	1	-0.119	-0.118	147	-20.8
EBV:39902-40193-	hsa-miR-3170	1		0.072	147	-27.5
EBV:146233-150348+	hsa-miR-3194-5p	1		0.026	147	-22.28
EBV:146233-150348+	hsa-miR-32-5p	1	-0.02	-0.056	147	-14.04
EBV:156527-158751+	hsa-miR-323a-3p	1			147	-20.83
EBV:39902-40193-	hsa-miR-330-5p	1	-0.108	-0.071	147	-23.47
EBV:158625-159918+	hsa-miR-340-3p	1	-0.096	0.009	147	-15.05
EBV:146233-150348+	hsa-miR-3605-3p	1	-0.227	-0.072	147	-22.51
EBV:158625-159918+	hsa-miR-3616-3p	1			147	-19.04
EBV:158625-159918+	hsa-miR-3661	1	-0.138	-0.098	147	-22.78
EBV:158625-159918+	hsa-miR-371a-3p	1			147	-21.03
EBV:146233-150348+	hsa-miR-381-3p	1			147	-22.3
EBV:158625-159918+	hsa-miR-3916	1	-0.045	-0.062	147	-21.86
EBV:156527-158751+	hsa-miR-3917	1	-0.281	-0.162	147	-19.76
EBV:156527-158751+	hsa-miR-3928-5p	1	-0.053	-0.071	147	-21.43
EBV:158625-159918+	hsa-miR-4274	1			147	-30.09
EBV:360-951+	hsa-miR-4276	1	-0.109	-0.12	147	-12.11
EBV:146233-150348+	hsa-miR-4300	1		0.015	147	-19.55
EBV:158625-159918+	hsa-miR-4329	1			147	-23.59
EBV:146233-150348+	hsa-miR-4433b-3p	1			147	-32.02
EBV:360-951+	hsa-miR-4435	1		-0.01	147	-23.72
EBV:156527-158751+	hsa-miR-4436a	1	-0.023	-0.032	147	-17.43
EBV:158625-159918+	hsa-miR-4439	1			147	-22.42
EBV:360-951+	hsa-miR-4446-3p	1	-0.199	-0.146	147	-17.86
EBV:156527-158751+	hsa-miR-4470	1	-0.099	-0.159	147	-17.4
EBV:158625-159918+	hsa-miR-4487	1	-0.039	0.001	147	-21.52
EBV:156527-158751+	hsa-miR-4538	1	-0.159	-0.17	147	-20.29
EBV:156527-158751+	hsa-miR-4653-3p	1	-0.09	-0.119	147	-15.01
EBV:156527-158751+	hsa-miR-4659a-3p	1			147	-16.78
EBV:146233-150348+	hsa-miR-4679	1	-0.062	-0.174	147	-17.13
EBV:146233-150348+	hsa-miR-4681	1	-0.157	-0.146	147	-19
EBV:158625-159918+	hsa-miR-4682	1			147	-25.75
EBV:39902-40193-	hsa-miR-4685-5p	1	-0.098	0.005	147	-27.58
EBV:146233-150348+	hsa-miR-4694-3p	1			147	-13.09
EBV:146233-150348+	hsa-miR-4701-5p	1	-0.186	-0.144	147	-21.37
EBV:158625-159918+	hsa-miR-4706	1			147	-28.35
EBV:360-951+	hsa-miR-4710	1			147	-23.48
EBV:146233-150348+	hsa-miR-4723-5p	1			147	-28.4
EBV:149581-150348+	hsa-miR-4723-5p	1			147	-28.4
EBV:156527-158751+	hsa-miR-4734	1			147	-34.9
EBV:158625-159918+	hsa-miR-4734	1			147	-34.9
EBV:156527-158751+	hsa-miR-4749-3p	1			147	-29.16
EBV:146233-150348+	hsa-miR-4750-3p	1	-0.123	-0.145	147	-16.69
EBV:39902-40193-	hsa-miR-4758-3p	1	-0.123	0.012	147	-23.07
EBV:158625-159918+	hsa-miR-4778-5p	1			147	-22.19
EBV:360-951+	hsa-miR-4793-3p	1		-0.003	147	-22.46
EBV:158625-159918+	hsa-miR-484	1			147	-26.41
EBV:156527-158751+	hsa-miR-486-3p	1			147	-22.57
EBV:360-951+	hsa-miR-497-5p	1	-0.282	-0.203	147	-16.57
EBV:156527-158751+	hsa-miR-5006-5p	1	-0.092	-0.053	147	-18.38
EBV:156527-158751+	hsa-miR-5009-5p	1	-0.177	-0.231	147	-19.55
EBV:146233-150348+	hsa-miR-505-5p	1			147	-20.06
EBV:360-951+	hsa-miR-5094	1	-0.156	-0.181	147	-15.49
EBV:156527-158751+	hsa-miR-513b-3p	1		0.017	147	-20.49
EBV:158625-159918+	hsa-miR-519e-5p	1		-0.018	147	-20.02
EBV:360-951+	hsa-miR-548ap-3p	1		0.005	147	-12.82
EBV:146233-150348+	hsa-miR-548g-3p	1			147	-11.94
EBV:360-951+	hsa-miR-553	1		0.004	147	-17.37
EBV:39902-40193-	hsa-miR-554	1	-0.111	-0.035	147	-19.46
EBV:360-951+	hsa-miR-5695	1	-0.072	-0.077	147	-15.67
EBV:39902-40193-	hsa-miR-6071	1	-0.047	-0.026	147	-21.28
EBV:158625-159918+	hsa-miR-6087	1		0.041	147	-29.93
EBV:156527-158751+	hsa-miR-616-5p	1		-0.014	147	-17.73
EBV:146233-150348+	hsa-miR-617	1	-0.121	-0.104	147	-13.68
EBV:360-951+	hsa-miR-621	1	-0.213	-0.145	147	-17.28
EBV:156527-158751+	hsa-miR-6502-3p	1	-0.009	-0.041	147	-13.18
EBV:149581-150348+	hsa-miR-6505-3p	1		0.021	147	-15.34
EBV:156527-158751+	hsa-miR-6515-5p	1	-0.119	-0.066	147	-18.16
EBV:39902-40193-	hsa-miR-661	1		0.005	147	-26.92
EBV:158625-159918+	hsa-miR-6720-3p	1			147	-23.79
EBV:360-951+	hsa-miR-6723-5p	1	-0.187	-0.109	147	-19.28
EBV:146233-150348+	hsa-miR-6743-5p	1		-0.007	147	-27.72
EBV:158625-159918+	hsa-miR-6743-5p	1			147	-28.76
EBV:146233-150348+	hsa-miR-6749-5p	1			147	-32.18
EBV:39902-40193-	hsa-miR-6756-5p	1	-0.35	-0.207	147	-27.55
EBV:158625-159918+	hsa-miR-6756-5p	1	-0.263	-0.236	147	-21.24
EBV:146233-150348+	hsa-miR-6756-5p	1	-0.022	-0.023	147	-26.89
EBV:146233-150348+	hsa-miR-6768-5p	1		0.048	147	-29.59
EBV:158625-159918+	hsa-miR-6769b-5p	1	-0.258	-0.253	147	-23.16
EBV:146233-150348+	hsa-miR-6780a-3p	1			147	-22.81
EBV:39902-40193-	hsa-miR-6783-3p	1			147	-27.43
EBV:146233-150348+	hsa-miR-6796-3p	1			147	-34.94
EBV:158625-159918+	hsa-miR-6801-3p	1			147	-31.14
EBV:156527-158751+	hsa-miR-6803-5p	1		0.027	147	-31.33
EBV:146233-150348+	hsa-miR-6811-3p	1		0.011	147	-19.01
EBV:146233-150348+	hsa-miR-6829-5p	1	-0.071	-0.051	147	-20.43
EBV:146233-150348+	hsa-miR-6837-5p	1	-0.18	-0.137	147	-25.23
EBV:156527-158751+	hsa-miR-6848-3p	1	-0.139	-0.118	147	-16.97
EBV:156527-158751+	hsa-miR-6850-5p	1	-0.169	-0.058	147	-20.19
EBV:146233-150348+	hsa-miR-6867-3p	1		0.059	147	-26.06
EBV:146233-150348+	hsa-miR-6873-5p	1			147	-26.35
EBV:146233-150348+	hsa-miR-6874-5p	1		0.016	147	-24.05
EBV:39902-40193-	hsa-miR-6892-3p	1			147	-26.22
EBV:156527-158751+	hsa-miR-708-5p	1		0.04	147	-20.8
EBV:146233-150348+	hsa-miR-7110-5p	1			147	-35.65
EBV:158625-159918+	hsa-miR-7158-5p	1		0.043	147	-28.11
EBV:146233-150348+	hsa-miR-764	1	-0.282	-0.253	147	-14.53
EBV:146233-150348+	hsa-miR-8057	1	-0.023	-0.004	147	-18.13
EBV:156527-158751+	hsa-miR-8059	1	-0.15	-0.13	147	-19.4
EBV:146233-150348+	hsa-miR-8064	1	-0.136	-0.157	147	-21.17
EBV:146233-150348+	hsa-miR-8070	1	-0.038	-0.152	147	-16.24
EBV:156527-158751+	hsa-miR-8070	1			147	-24.95
EBV:156527-158751+	hsa-miR-876-5p	1			147	-29.05
EBV:158625-159918+	hsa-miR-920	1	-0.253	-0.102	147	-20.8
EBV:156527-158751+	hsa-miR-1181	1			146	-35.67
EBV:146233-150348+	hsa-miR-1205	1		-0.006	146	-20.61
EBV:146233-150348+	hsa-miR-1208	1			146	-20.28
EBV:149581-150348+	hsa-miR-122-3p	1	-0.244	-0.138	146	-12.53
EBV:146233-150348+	hsa-miR-122-3p	1	-0.147	-0.076	146	-12.53
EBV:39902-40193-	hsa-miR-1224-3p	1	-0.116	0.011	146	-28.88
EBV:158625-159918+	hsa-miR-1231	1		0.066	146	-26.24
EBV:146233-150348+	hsa-miR-1266-3p	1	-0.133	-0.149	146	-19.9
EBV:156527-158751+	hsa-miR-1271-5p	1	-0.228	-0.154	146	-12.33
EBV:156527-158751+	hsa-miR-1306-3p	1	-0.2	-0.017	146	-17.49
EBV:146233-150348+	hsa-miR-1307-3p	1			146	-29.04
EBV:149581-150348+	hsa-miR-1307-3p	1			146	-29.04
EBV:146233-150348+	hsa-miR-149-3p	1			146	-27.01
EBV:360-951+	hsa-miR-152-3p	1			146	-16.88
EBV:156527-158751+	hsa-miR-183-5p	1	-0.057	-0.001	146	-22.29
EBV:360-951+	hsa-miR-1911-5p	1	-0.224	-0.171	146	-22.98
EBV:158625-159918+	hsa-miR-199a-5p	1	-0.265	-0.211	146	-16.37
EBV:156527-158751+	hsa-miR-199a-5p	1	-0.248	-0.2	146	-16.37
EBV:146233-150348+	hsa-miR-221-5p	1	-0.008	-0.037	146	-16.75
EBV:156527-158751+	hsa-miR-2278	1	-0.011	-0.035	146	-18.23
EBV:158625-159918+	hsa-miR-26b-5p	1	-0.004	-0.01	146	-16.39
EBV:146233-150348+	hsa-miR-28-5p	1		0.039	146	-23.3
EBV:149581-150348+	hsa-miR-28-5p	1		0.039	146	-23.3
EBV:146233-150348+	hsa-miR-29b-1-5p	1		0.017	146	-21.21
EBV:156527-158751+	hsa-miR-29b-2-5p	1	-0.108	-0.165	146	-15.31
EBV:156527-158751+	hsa-miR-3064-3p	1	-0.108	-0.028	146	-26.21
EBV:360-951+	hsa-miR-3123	1	-0.121	-0.204	146	-8.67
EBV:146233-150348+	hsa-miR-3140-3p	1			146	-20.97
EBV:146233-150348+	hsa-miR-3150a-3p	1			146	-19.96
EBV:158625-159918+	hsa-miR-3155a	1			146	-30.4
EBV:156527-158751+	hsa-miR-3157-5p	1		0.024	146	-27.36
EBV:360-951+	hsa-miR-3159	1			146	-14.15
EBV:158625-159918+	hsa-miR-3173-5p	1	-0.069	0.04	146	-20.35
EBV:158625-159918+	hsa-miR-3182	1	-0.235	-0.354	146	-14.27
EBV:146233-150348+	hsa-miR-3184-3p	1			146	-25.05
EBV:146233-150348+	hsa-miR-320a	1			146	-25.94
EBV:146233-150348+	hsa-miR-320b	1			146	-26.31
EBV:146233-150348+	hsa-miR-323a-5p	1			146	-28.91
EBV:146233-150348+	hsa-miR-324-5p	1		0.064	146	-28.35
EBV:156527-158751+	hsa-miR-331-3p	1	-0.134	-0.078	146	-22.64
EBV:146233-150348+	hsa-miR-346	1			146	-22.04
EBV:146233-150348+	hsa-miR-363-3p	1	-0.03	-0.071	146	-15.57
EBV:146233-150348+	hsa-miR-3654	1	-0.244	-0.244	146	-11.73
EBV:146233-150348+	hsa-miR-365b-5p	1			146	-24.24
EBV:39902-40193-	hsa-miR-3661	1	-0.143	-0.071	146	-28.46
EBV:146233-150348+	hsa-miR-3666	1			146	-23.5
EBV:360-951+	hsa-miR-367-5p	1			146	-14.45
EBV:146233-150348+	hsa-miR-3671	1		-0.005	146	-17.57
EBV:360-951+	hsa-miR-3688-3p	1	-0.016	-0.112	146	-15.09
EBV:146233-150348+	hsa-miR-3688-5p	1			146	-17.34
EBV:156527-158751+	hsa-miR-3690	1	-0.232	-0.2	146	-18.9
EBV:158625-159918+	hsa-miR-378g	1			146	-23.38
EBV:156527-158751+	hsa-miR-3945	1	-0.092	-0.061	146	-18.95
EBV:158625-159918+	hsa-miR-421	1	-0.067	-0.158	146	-15.74
EBV:146233-150348+	hsa-miR-425-5p	1			146	-22.05
EBV:156527-158751+	hsa-miR-4426	1	-0.055	-0.104	146	-12.39
EBV:146233-150348+	hsa-miR-4433a-3p	1			146	-27.4
EBV:158625-159918+	hsa-miR-4505	1	-0.049	0.032	146	-20.04
EBV:146233-150348+	hsa-miR-4508	1			146	-30.11
EBV:158625-159918+	hsa-miR-4639-5p	1	-0.005	-0.004	146	-14.73
EBV:156527-158751+	hsa-miR-4676-5p	1	-0.092	-0.08	146	-20.73
EBV:156527-158751+	hsa-miR-4690-3p	1		0.018	146	-22.27
EBV:156527-158751+	hsa-miR-4708-3p	1	-0.039	0.012	146	-18.64
EBV:156527-158751+	hsa-miR-4709-3p	1		0.027	146	-23.48
EBV:156527-158751+	hsa-miR-4713-5p	1	-0.003	0.001	146	-15.71
EBV:146233-150348+	hsa-miR-4724-5p	1			146	-21.87
EBV:360-951+	hsa-miR-4726-5p	1			146	-26.01
EBV:156527-158751+	hsa-miR-4732-5p	1			146	-28.6
EBV:146233-150348+	hsa-miR-4735-3p	1	-0.02	-0.066	146	-14.94
EBV:156527-158751+	hsa-miR-4746-3p	1		0.087	146	-30.44
EBV:156527-158751+	hsa-miR-4753-3p	1			146	-18.58
EBV:146233-150348+	hsa-miR-4769-3p	1		0.076	146	-23.69
EBV:146233-150348+	hsa-miR-4781-5p	1	-0.224	-0.084	146	-19.2
EBV:156527-158751+	hsa-miR-4786-5p	1	-0.04	-0.04	146	-23.32
EBV:156527-158751+	hsa-miR-4803	1			146	-15.88
EBV:146233-150348+	hsa-miR-491-5p	1			146	-22.59
EBV:39902-40193-	hsa-miR-4999-5p	1			146	-24.27
EBV:146233-150348+	hsa-miR-499a-3p	1			146	-19.64
EBV:146233-150348+	hsa-miR-5001-5p	1			146	-24.64
EBV:156527-158751+	hsa-miR-5004-5p	1			146	-24.22
EBV:360-951+	hsa-miR-503-5p	1	-0.213	-0.149	146	-26.3
EBV:158625-159918+	hsa-miR-508-5p	1			146	-26.82
EBV:146233-150348+	hsa-miR-5189-3p	1	-0.225	-0.177	146	-23.88
EBV:158625-159918+	hsa-miR-5193	1			146	-30.87
EBV:146233-150348+	hsa-miR-542-3p	1	-0.258	-0.35	146	-16.05
EBV:39902-40193-	hsa-miR-542-5p	1	-0.22	-0.102	146	-20.69
EBV:156527-158751+	hsa-miR-550b-2-5p	1		0.068	146	-20.13
EBV:39902-40193-	hsa-miR-5691	1	-0.236	-0.144	146	-22.74
EBV:360-951+	hsa-miR-5739	1			146	-27.95
EBV:156527-158751+	hsa-miR-6089	1	-0.134	-0.104	146	-27.13
EBV:156527-158751+	hsa-miR-619-3p	1	-0.1	-0.06	146	-19.76
EBV:146233-150348+	hsa-miR-625-5p	1	-0.175	-0.142	146	-19.84
EBV:158625-159918+	hsa-miR-636	1			146	-22.62
EBV:39902-40193-	hsa-miR-642a-5p	1	-0.065	0.087	146	-27.18
EBV:146233-150348+	hsa-miR-650	1	-0.3	-0.165	146	-19.07
EBV:156527-158751+	hsa-miR-652-3p	1			146	-23.64
EBV:146233-150348+	hsa-miR-662	1	-0.138	-0.092	146	-21.64
EBV:156527-158751+	hsa-miR-670-3p	1	-0.031	-0.087	146	-14.07
EBV:156527-158751+	hsa-miR-6715b-3p	1		-0.004	146	-21.21
EBV:158625-159918+	hsa-miR-6715b-3p	1		0.002	146	-21.21
EBV:146233-150348+	hsa-miR-6737-3p	1		0.088	146	-25.68
EBV:146233-150348+	hsa-miR-6738-3p	1	-0.015	-0.01	146	-13.73
EBV:39902-40193-	hsa-miR-6741-5p	1	-0.109	-0.004	146	-26.22
EBV:146233-150348+	hsa-miR-6761-3p	1	-0.09	-0.013	146	-16.78
EBV:158625-159918+	hsa-miR-6764-5p	1			146	-32.69
EBV:156527-158751+	hsa-miR-6771-3p	1	-0.181	-0.174	146	-14.33
EBV:146233-150348+	hsa-miR-6792-3p	1	-0.004	-0.026	146	-22.45
EBV:158625-159918+	hsa-miR-6808-5p	1		-0.022	146	-30.51
EBV:146233-150348+	hsa-miR-6810-3p	1			146	-28.95
EBV:146233-150348+	hsa-miR-6814-5p	1	-0.055	-0.093	146	-17.47
EBV:156527-158751+	hsa-miR-6831-5p	1			146	-24.29
EBV:156527-158751+	hsa-miR-6833-5p	1	-0.074	-0.116	146	-11.87
EBV:156527-158751+	hsa-miR-6834-3p	1	-0.15	-0.139	146	-12.28
EBV:146233-150348+	hsa-miR-6866-5p	1		-0.012	146	-21.26
EBV:146233-150348+	hsa-miR-6869-5p	1		0.063	146	-29.53
EBV:149581-150348+	hsa-miR-6889-5p	1		-0.014	146	-32.62
EBV:360-951+	hsa-miR-7108-5p	1			146	-30.08
EBV:146233-150348+	hsa-miR-7155-5p	1	-0.12	-0.089	146	-23.81
EBV:156527-158751+	hsa-miR-760	1			146	-22.66
EBV:158625-159918+	hsa-miR-769-5p	1	-0.089	-0.07	146	-20.33
EBV:39902-40193-	hsa-miR-7704	1	-0.19	-0.069	146	-21.33
EBV:146233-150348+	hsa-miR-7843-5p	1		0.033	146	-22.68
EBV:158625-159918+	hsa-miR-7851-3p	1	-0.096	-0.035	146	-17.42
EBV:158625-159918+	hsa-miR-874-3p	1			146	-29.08
EBV:146233-150348+	hsa-miR-874-5p	1	-0.233	-0.123	146	-21.11
EBV:156527-158751+	hsa-miR-876-3p	1	-0.056	-0.035	146	-10.07
EBV:156527-158751+	hsa-miR-885-5p	1	-0.052	-0.134	146	-10.18
EBV:156527-158751+	hsa-miR-889-5p	1	-0.129	-0.106	146	-17.96
EBV:156527-158751+	hsa-miR-891a-5p	1	-0.135	-0.048	146	-16.49
EBV:146233-150348+	hsa-miR-93-5p	1			146	-25.44
EBV:158625-159918+	hsa-miR-933	1	-0.163	0.004	146	-20.1
EBV:156527-158751+	hsa-miR-939-5p	1			146	-28.17
EBV:156527-158751+	hsa-miR-9500	1	-0.075	-0.127	146	-13.56
EBV:156527-158751+	hsa-let-7i-3p	1	-0.092	0.028	145	-17.5
EBV:158625-159918+	hsa-miR-103b	1			145	-19.91
EBV:158625-159918+	hsa-miR-10b-5p	1	-0.052	-0.011	145	-16.67
EBV:360-951+	hsa-miR-1202	1		-0.004	145	-23.71
EBV:156527-158751+	hsa-miR-1207-3p	1	-0.042	-0.023	145	-15.21
EBV:146233-150348+	hsa-miR-1234-3p	1			145	-34.06
EBV:158625-159918+	hsa-miR-1237-5p	1	-0.373	-0.166	145	-23.79
EBV:146233-150348+	hsa-miR-125a-5p	1	-0.013	-0.017	145	-18.74
EBV:158625-159918+	hsa-miR-1268b	1			145	-29.12
EBV:156527-158751+	hsa-miR-1285-5p	1	-0.11	-0.146	145	-17.94
EBV:156527-158751+	hsa-miR-1292-3p	1	-0.417	-0.124	145	-25.86
EBV:146233-150348+	hsa-miR-142-5p	1			145	-20.83
EBV:146233-150348+	hsa-miR-143-3p	1	-0.117	-0.169	145	-12.26
EBV:146233-150348+	hsa-miR-151a-5p	1		0.038	145	-28.94
EBV:149581-150348+	hsa-miR-151a-5p	1		0.038	145	-28.94
EBV:146233-150348+	hsa-miR-1537-3p	1	-0.171	-0.155	145	-11.38
EBV:158625-159918+	hsa-miR-187-5p	1		0.027	145	-24.51
EBV:146233-150348+	hsa-miR-187-5p	1			145	-18.2
EBV:360-951+	hsa-miR-1909-5p	1		-0.014	145	-25.26
EBV:146233-150348+	hsa-miR-1914-3p	1		0.034	145	-26.33
EBV:146233-150348+	hsa-miR-196b-5p	1			145	-21.79
EBV:146233-150348+	hsa-miR-2054	1			145	-12.79
EBV:39902-40193-	hsa-miR-2117	1			145	-19.88
EBV:156527-158751+	hsa-miR-22-5p	1			145	-20.91
EBV:156527-158751+	hsa-miR-3155a	1			145	-25.89
EBV:158625-159918+	hsa-miR-3158-5p	1			145	-23.87
EBV:158625-159918+	hsa-miR-3160-3p	1			145	-17.34
EBV:360-951+	hsa-miR-3173-3p	1	-0.08	-0.077	145	-14.66
EBV:146233-150348+	hsa-miR-3193	1	-0.13	-0.063	145	-20.85
EBV:156527-158751+	hsa-miR-335-5p	1	-0.012	-0.028	145	-12.91
EBV:156527-158751+	hsa-miR-34c-3p	1			145	-21.12
EBV:360-951+	hsa-miR-3605-5p	1			145	-20.99
EBV:156527-158751+	hsa-miR-3621	1			145	-32.14
EBV:146233-150348+	hsa-miR-3622b-5p	1			145	-32.24
EBV:146233-150348+	hsa-miR-3656	1	-0.107	-0.039	145	-23.83
EBV:156527-158751+	hsa-miR-3665	1	-0.122	-0.139	145	-20.83
EBV:146233-150348+	hsa-miR-367-3p	1	-0.02	-0.056	145	-19.31
EBV:39902-40193-	hsa-miR-3675-5p	1		0.006	145	-18.77
EBV:158625-159918+	hsa-miR-3675-5p	1			145	-27.18
EBV:146233-150348+	hsa-miR-3683	1	-0.17	-0.068	145	-13.25
EBV:146233-150348+	hsa-miR-374a-3p	1			145	-16.31
EBV:156527-158751+	hsa-miR-378c	1		-0.028	145	-18.86
EBV:149581-150348+	hsa-miR-383-3p	1	-0.136	-0.142	145	-15.87
EBV:158625-159918+	hsa-miR-3909	1			145	-24.58
EBV:156527-158751+	hsa-miR-3913-3p	1			145	-19.11
EBV:156527-158751+	hsa-miR-3938	1	-0.323	-0.384	145	-10.56
EBV:158625-159918+	hsa-miR-3944-5p	1	-0.109	-0.034	145	-22.63
EBV:158625-159918+	hsa-miR-3960	1	-0.561	-0.189	145	-25.35
EBV:146233-150348+	hsa-miR-411-3p	1	-0.002	-0.092	145	-14.01
EBV:146233-150348+	hsa-miR-422a	1	-0.217	-0.218	145	-16.76
EBV:158625-159918+	hsa-miR-423-3p	1		0.043	145	-30.76
EBV:158625-159918+	hsa-miR-4283	1	-0.146	-0.062	145	-17.56
EBV:158625-159918+	hsa-miR-4285	1	-0.17	0.03	145	-20.73
EBV:146233-150348+	hsa-miR-4289	1	-0.031	-0.081	145	-16.13
EBV:158625-159918+	hsa-miR-4292	1	-0.251	-0.135	145	-20.49
EBV:146233-150348+	hsa-miR-4304	1			145	-25.94
EBV:156527-158751+	hsa-miR-4317	1	-0.073	-0.054	145	-12.35
EBV:158625-159918+	hsa-miR-4319	1	-0.071	-0.041	145	-18.16
EBV:156527-158751+	hsa-miR-4434	1	-0.096	-0.12	145	-14.53
EBV:158625-159918+	hsa-miR-4435	1	-0.111	-0.085	145	-22.42
EBV:158625-159918+	hsa-miR-4436b-3p	1	-0.152	-0.112	145	-20.78
EBV:146233-150348+	hsa-miR-4436b-3p	1			145	-24.45
EBV:158625-159918+	hsa-miR-4437	1	-0.09	-0.037	145	-18.63
EBV:156527-158751+	hsa-miR-4456	1	-0.102	-0.035	145	-19.42
EBV:146233-150348+	hsa-miR-4475	1			145	-19.67
EBV:146233-150348+	hsa-miR-4479	1			145	-27.67
EBV:149581-150348+	hsa-miR-4485-5p	1	-0.149	0	145	-20.72
EBV:156527-158751+	hsa-miR-4492	1	-0.134	-0.075	145	-29.23
EBV:158625-159918+	hsa-miR-4523	1	-0.126	-0.014	145	-25.13
EBV:360-951+	hsa-miR-4524a-5p	1	-0.152	-0.108	145	-13.62
EBV:360-951+	hsa-miR-4524b-5p	1	-0.152	-0.108	145	-12.96
EBV:156527-158751+	hsa-miR-4533	1	-0.103	-0.116	145	-19.84
EBV:146233-150348+	hsa-miR-4536-5p	1			145	-19.57
EBV:39902-40193-	hsa-miR-4664-5p	1			145	-25.64
EBV:158625-159918+	hsa-miR-4665-3p	1		0.072	145	-38.98
EBV:146233-150348+	hsa-miR-4671-5p	1	-0.054	-0.009	145	-14.64
EBV:149581-150348+	hsa-miR-4682	1			145	-28.32
EBV:158625-159918+	hsa-miR-4701-5p	1	-0.06	0.013	145	-16.18
EBV:156527-158751+	hsa-miR-4712-5p	1	-0.124	-0.122	145	-15.15
EBV:156527-158751+	hsa-miR-4717-3p	1			145	-23.17
EBV:158625-159918+	hsa-miR-4718	1	-0.157	-0.126	145	-17.8
EBV:158625-159918+	hsa-miR-4720-5p	1	-0.071	-0.072	145	-12.88
EBV:158625-159918+	hsa-miR-4723-5p	1			145	-26.64
EBV:158625-159918+	hsa-miR-4730	1	-0.097	0.057	145	-24.94
EBV:146233-150348+	hsa-miR-4733-5p	1			145	-18.36
EBV:156527-158751+	hsa-miR-4741	1			145	-23.07
EBV:146233-150348+	hsa-miR-4748	1	-0.04	-0.056	145	-18.91
EBV:156527-158751+	hsa-miR-4774-3p	1	-0.03	-0.083	145	-11.74
EBV:156527-158751+	hsa-miR-4793-5p	1			145	-29.07
EBV:146233-150348+	hsa-miR-5089-5p	1			145	-27.19
EBV:156527-158751+	hsa-miR-5092	1	-0.145	-0.127	145	-20.39
EBV:146233-150348+	hsa-miR-5095	1		0.035	145	-25.77
EBV:156527-158751+	hsa-miR-516b-5p	1		0.056	145	-18.25
EBV:146233-150348+	hsa-miR-5193	1	-0.049	-0.049	145	-17.26
EBV:39902-40193-	hsa-miR-5193	1			145	-24.91
EBV:146233-150348+	hsa-miR-525-5p	1		0.108	145	-23.57
EBV:156527-158751+	hsa-miR-542-3p	1		-0.006	145	-19.96
EBV:146233-150348+	hsa-miR-5584-5p	1			145	-18.8
EBV:146233-150348+	hsa-miR-5588-3p	1			145	-20.44
EBV:146233-150348+	hsa-miR-5681b	1	-0.05	-0.059	145	-13.03
EBV:146233-150348+	hsa-miR-5695	1	-0.003	-0.058	145	-12.74
EBV:156527-158751+	hsa-miR-5703	1	-0.096	-0.12	145	-15.48
EBV:156527-158751+	hsa-miR-593-3p	1	-0.122	-0.126	145	-13.6
EBV:149581-150348+	hsa-miR-596	1	-0.165	-0.083	145	-18.8
EBV:146233-150348+	hsa-miR-6076	1	-0.043	-0.043	145	-18.77
EBV:146233-150348+	hsa-miR-6088	1	-0.08	-0.107	145	-14.27
EBV:156527-158751+	hsa-miR-615-3p	1	-0.204	-0.061	145	-19.83
EBV:156527-158751+	hsa-miR-627-3p	1			145	-12.57
EBV:158625-159918+	hsa-miR-627-3p	1			145	-12.57
EBV:146233-150348+	hsa-miR-642a-5p	1		0.069	145	-21.18
EBV:39902-40193-	hsa-miR-663b	1		0.026	145	-33.49
EBV:158625-159918+	hsa-miR-6724-5p	1		0.042	145	-32.83
EBV:146233-150348+	hsa-miR-6728-5p	1			145	-27.18
EBV:156527-158751+	hsa-miR-6729-3p	1			145	-25.79
EBV:156527-158751+	hsa-miR-6735-5p	1			145	-21.69
EBV:146233-150348+	hsa-miR-6739-5p	1			145	-16.9
EBV:146233-150348+	hsa-miR-6741-5p	1			145	-28.12
EBV:158625-159918+	hsa-miR-6756-3p	1		-0.042	145	-25.09
EBV:156527-158751+	hsa-miR-6757-3p	1	-0.04	-0.056	145	-16.21
EBV:158625-159918+	hsa-miR-6766-5p	1	-0.273	-0.251	145	-20.38
EBV:146233-150348+	hsa-miR-6772-3p	1		0.038	145	-22.52
EBV:156527-158751+	hsa-miR-6786-5p	1	-0.225	-0.079	145	-21.46
EBV:146233-150348+	hsa-miR-6821-3p	1			145	-20.71
EBV:158625-159918+	hsa-miR-6848-5p	1	-0.132	-0.03	145	-28.59
EBV:158625-159918+	hsa-miR-6849-3p	1		0.032	145	-25.52
EBV:158625-159918+	hsa-miR-6850-3p	1	-0.166	0.047	145	-29.64
EBV:146233-150348+	hsa-miR-6851-5p	1		0.031	145	-28.12
EBV:158625-159918+	hsa-miR-6868-3p	1		-0.013	145	-19.63
EBV:146233-150348+	hsa-miR-6875-3p	1		0.019	145	-21.79
EBV:158625-159918+	hsa-miR-6884-3p	1			145	-15.91
EBV:156527-158751+	hsa-miR-6889-5p	1			145	-30.55
EBV:158625-159918+	hsa-miR-6894-5p	1		0.057	145	-26.24
EBV:158625-159918+	hsa-miR-7106-3p	1			145	-19.68
EBV:156527-158751+	hsa-miR-7114-5p	1	-0.118	-0.141	145	-20.34
EBV:146233-150348+	hsa-miR-769-3p	1		0.08	145	-26.8
EBV:146233-150348+	hsa-miR-7704	1			145	-33.75
EBV:158625-159918+	hsa-miR-7856-5p	1	-0.047	-0.172	145	-10.23
EBV:156527-158751+	hsa-miR-8068	1	-0.008	-0.099	145	-8.09
EBV:158625-159918+	hsa-miR-92a-1-5p	1	-0.08	-0.003	145	-18.41
EBV:146233-150348+	hsa-miR-92b-5p	1	-0.257	-0.059	145	-25.72
EBV:146233-150348+	hsa-let-7a-2-3p	1	-0.074	-0.182	144	-12.5
EBV:156527-158751+	hsa-let-7b-5p	1			144	-16.55
EBV:146233-150348+	hsa-miR-1231	1		0.037	144	-21.31
EBV:360-951+	hsa-miR-1237-3p	1	-0.281	-0.321	144	-15.53
EBV:146233-150348+	hsa-miR-1238-5p	1		0.045	144	-27.22
EBV:158625-159918+	hsa-miR-1269a	1		0.058	144	-25.05
EBV:158625-159918+	hsa-miR-1273a	1			144	-25.46
EBV:158625-159918+	hsa-miR-1273c	1			144	-30.07
EBV:146233-150348+	hsa-miR-1306-3p	1	-0.131	-0.026	144	-19.79
EBV:156527-158751+	hsa-miR-1321	1			144	-21.49
EBV:156527-158751+	hsa-miR-145-5p	1	-0.037	0.023	144	-16.58
EBV:156527-158751+	hsa-miR-181b-5p	1			144	-19.39
EBV:158625-159918+	hsa-miR-181b-5p	1			144	-19.39
EBV:156527-158751+	hsa-miR-181d-5p	1			144	-18.15
EBV:158625-159918+	hsa-miR-181d-5p	1			144	-18.15
EBV:146233-150348+	hsa-miR-190a-5p	1			144	-20.8
EBV:146233-150348+	hsa-miR-1911-5p	1			144	-31.79
EBV:156527-158751+	hsa-miR-1911-5p	1			144	-23.29
EBV:146233-150348+	hsa-miR-1913	1	-0.164	-0.089	144	-24.35
EBV:156527-158751+	hsa-miR-200b-5p	1			144	-21.64
EBV:146233-150348+	hsa-miR-210-3p	1	-0.044	-0.015	144	-15.58
EBV:158625-159918+	hsa-miR-22-5p	1			144	-17.59
EBV:149581-150348+	hsa-miR-23a-3p	1	-0.023	-0.005	144	-18.42
EBV:149581-150348+	hsa-miR-23b-3p	1	-0.023	-0.005	144	-18.42
EBV:146233-150348+	hsa-miR-23b-5p	1	-0.073	-0.054	144	-20.23
EBV:158625-159918+	hsa-miR-29a-5p	1			144	-17.66
EBV:156527-158751+	hsa-miR-29b-3p	1			144	-20.49
EBV:158625-159918+	hsa-miR-3156-5p	1			144	-21.12
EBV:146233-150348+	hsa-miR-3180-3p	1			144	-30.49
EBV:158625-159918+	hsa-miR-3183	1			144	-34.15
EBV:146233-150348+	hsa-miR-3191-3p	1		0.018	144	-29.75
EBV:146233-150348+	hsa-miR-3192-5p	1			144	-32.5
EBV:146233-150348+	hsa-miR-326	1	-0.027	-0.064	144	-21.37
EBV:146233-150348+	hsa-miR-340-3p	1			144	-17.25
EBV:158625-159918+	hsa-miR-34b-3p	1			144	-18.02
EBV:156527-158751+	hsa-miR-3614-3p	1	-0.012	-0.001	144	-17.48
EBV:146233-150348+	hsa-miR-3614-5p	1		0.027	144	-22.91
EBV:158625-159918+	hsa-miR-3617-3p	1		0.014	144	-20.75
EBV:156527-158751+	hsa-miR-3620-5p	1	-0.168	-0.123	144	-21.67
EBV:158625-159918+	hsa-miR-3620-5p	1			144	-27.46
EBV:146233-150348+	hsa-miR-3646	1			144	-11.81
EBV:39902-40193-	hsa-miR-3670	1	-0.103	-0.048	144	-18.07
EBV:146233-150348+	hsa-miR-3679-5p	1			144	-23.3
EBV:158625-159918+	hsa-miR-3928-3p	1	-0.158	-0.185	144	-17.14
EBV:360-951+	hsa-miR-412-5p	1		-0.006	144	-18.69
EBV:156527-158751+	hsa-miR-4261	1		0.029	144	-16.66
EBV:146233-150348+	hsa-miR-4286	1	-0.144	-0.127	144	-17.71
EBV:39902-40193-	hsa-miR-4290	1		0.057	144	-24.26
EBV:360-951+	hsa-miR-4312	1	-0.389	-0.35	144	-21.79
EBV:156527-158751+	hsa-miR-4318	1	-0.146	-0.179	144	-14.61
EBV:156527-158751+	hsa-miR-4326	1		0.061	144	-25.52
EBV:146233-150348+	hsa-miR-4425	1			144	-25
EBV:156527-158751+	hsa-miR-4445-5p	1	-0.021	-0.152	144	-11.68
EBV:156527-158751+	hsa-miR-4487	1	-0.141	-0.127	144	-17.3
EBV:156527-158751+	hsa-miR-4524b-5p	1	-0.351	-0.269	144	-17.05
EBV:156527-158751+	hsa-miR-4528	1			144	-10.92
EBV:158625-159918+	hsa-miR-4529-5p	1	-0.142	-0.057	144	-17.77
EBV:39902-40193-	hsa-miR-4633-5p	1			144	-17.06
EBV:360-951+	hsa-miR-4640-5p	1			144	-29.58
EBV:146233-150348+	hsa-miR-4655-3p	1			144	-22.89
EBV:39902-40193-	hsa-miR-4667-3p	1		0.057	144	-28.9
EBV:146233-150348+	hsa-miR-4686	1			144	-27.43
EBV:360-951+	hsa-miR-4689	1			144	-16.72
EBV:156527-158751+	hsa-miR-4718	1	-0.134	-0.117	144	-14.23
EBV:146233-150348+	hsa-miR-4722-5p	1		0.047	144	-28.66
EBV:39902-40193-	hsa-miR-4734	1			144	-33.65
EBV:156527-158751+	hsa-miR-4776-3p	1		0.03	144	-21.67
EBV:156527-158751+	hsa-miR-4777-3p	1			144	-19.51
EBV:156527-158751+	hsa-miR-4784	1	-0.101	-0.087	144	-16.54
EBV:156527-158751+	hsa-miR-485-5p	1			144	-20.23
EBV:146233-150348+	hsa-miR-488-5p	1	-0.039	-0.047	144	-13.34
EBV:156527-158751+	hsa-miR-5008-3p	1			144	-20.15
EBV:146233-150348+	hsa-miR-502-5p	1			144	-22.49
EBV:158625-159918+	hsa-miR-548f-5p	1	-0.135	-0.241	144	-12.46
EBV:158625-159918+	hsa-miR-550a-3-5p	1	-0.17	-0.07	144	-15.15
EBV:158625-159918+	hsa-miR-550a-5p	1	-0.17	-0.07	144	-18.88
EBV:146233-150348+	hsa-miR-558	1	-0.132	-0.084	144	-16.96
EBV:146233-150348+	hsa-miR-5586-3p	1			144	-25.98
EBV:156527-158751+	hsa-miR-589-5p	1			144	-30.79
EBV:156527-158751+	hsa-miR-6124	1		-0.007	144	-19.7
EBV:146233-150348+	hsa-miR-622	1			144	-17.7
EBV:158625-159918+	hsa-miR-631	1	-0.129	-0.083	144	-17.72
EBV:146233-150348+	hsa-miR-641	1			144	-10.63
EBV:360-951+	hsa-miR-648	1	-0.223	-0.186	144	-14.63
EBV:158625-159918+	hsa-miR-6508-3p	1	-0.124	-0.034	144	-17.72
EBV:158625-159918+	hsa-miR-661	1		0.023	144	-31.88
EBV:158625-159918+	hsa-miR-6717-5p	1			144	-26.19
EBV:39902-40193-	hsa-miR-6728-3p	1	-0.058	-0.042	144	-19.59
EBV:146233-150348+	hsa-miR-6742-3p	1			144	-28.33
EBV:146233-150348+	hsa-miR-675-5p	1			144	-27.56
EBV:146233-150348+	hsa-miR-6750-3p	1		0.104	144	-22.6
EBV:39902-40193-	hsa-miR-6751-5p	1	-0.146	-0.067	144	-24.05
EBV:158625-159918+	hsa-miR-6760-5p	1		0.072	144	-24.12
EBV:158625-159918+	hsa-miR-6771-5p	1		0.053	144	-32.41
EBV:146233-150348+	hsa-miR-6777-3p	1		0.046	144	-23.86
EBV:158625-159918+	hsa-miR-6779-5p	1	-0.054	-0.035	144	-25.27
EBV:158625-159918+	hsa-miR-6786-5p	1		0.035	144	-33.4
EBV:158625-159918+	hsa-miR-6813-5p	1			144	-29.57
EBV:146233-150348+	hsa-miR-6825-5p	1			144	-24.69
EBV:149581-150348+	hsa-miR-6825-5p	1			144	-24.69
EBV:156527-158751+	hsa-miR-6831-3p	1			144	-19.4
EBV:39902-40193-	hsa-miR-6837-5p	1	-0.098	0.005	144	-17.51
EBV:146233-150348+	hsa-miR-6852-5p	1		0.039	144	-22.41
EBV:158625-159918+	hsa-miR-6858-3p	1	-0.338	-0.269	144	-14
EBV:158625-159918+	hsa-miR-6858-5p	1		0.06	144	-31.57
EBV:156527-158751+	hsa-miR-6865-5p	1			144	-25.28
EBV:146233-150348+	hsa-miR-6887-3p	1	-0.108	-0.055	144	-21.89
EBV:360-951+	hsa-miR-6887-5p	1			144	-21.51
EBV:146233-150348+	hsa-miR-6895-5p	1	-0.065	-0.05	144	-17.47
EBV:146233-150348+	hsa-miR-7112-3p	1			144	-25.9
EBV:156527-158751+	hsa-miR-7152-5p	1			144	-20.8
EBV:146233-150348+	hsa-miR-7156-5p	1			144	-16.81
EBV:146233-150348+	hsa-miR-7974	1			144	-25.92
EBV:156527-158751+	hsa-miR-7978	1	-0.003	0.006	144	-19.33
EBV:146233-150348+	hsa-miR-8060	1	-0.017	-0.11	144	-18.28
EBV:146233-150348+	hsa-miR-8086	1			144	-20.86
EBV:158625-159918+	hsa-miR-934	1	-0.042	-0.048	144	-20.76
EBV:146233-150348+	hsa-miR-935	1		-0.013	144	-13.69
EBV:149581-150348+	hsa-miR-937-3p	1	-0.371	-0.153	144	-22.63
EBV:158625-159918+	hsa-miR-941	1			144	-26.86
EBV:156527-158751+	hsa-miR-98-5p	1			144	-15.36
EBV:156527-158751+	hsa-miR-1225-3p	1		0.091	143	-26.38
EBV:146233-150348+	hsa-miR-1251-3p	1	-0.036	-0.094	143	-10.09
EBV:146233-150348+	hsa-miR-1263	1			143	-19.61
EBV:158625-159918+	hsa-miR-1266-3p	1	-0.063	-0.028	143	-19.59
EBV:156527-158751+	hsa-miR-1266-3p	1	-0.061	-0.026	143	-19.59
EBV:158625-159918+	hsa-miR-1292-5p	1		-0.012	143	-21.67
EBV:158625-159918+	hsa-miR-132-5p	1		0.041	143	-18.37
EBV:156527-158751+	hsa-miR-134-5p	1	-0.174	-0.24	143	-23.57
EBV:156527-158751+	hsa-miR-182-5p	1	-0.072	-0.013	143	-27.34
EBV:146233-150348+	hsa-miR-187-3p	1	-0.081	0.041	143	-25.11
EBV:39902-40193-	hsa-miR-1908-3p	1			143	-36.42
EBV:360-951+	hsa-miR-195-5p	1	-0.261	-0.199	143	-14.73
EBV:360-951+	hsa-miR-20a-3p	1			143	-18.29
EBV:146233-150348+	hsa-miR-212-3p	1			143	-22.64
EBV:149581-150348+	hsa-miR-212-3p	1			143	-22.64
EBV:146233-150348+	hsa-miR-219b-3p	1		0.016	143	-18.27
EBV:158625-159918+	hsa-miR-23b-5p	1			143	-22.95
EBV:146233-150348+	hsa-miR-301a-3p	1			143	-19.94
EBV:146233-150348+	hsa-miR-301b-3p	1			143	-17.9
EBV:158625-159918+	hsa-miR-3064-5p	1			143	-30.07
EBV:156527-158751+	hsa-miR-3118	1	-0.163	-0.238	143	-17.65
EBV:149581-150348+	hsa-miR-3140-5p	1	-0.109	-0.121	143	-15.94
EBV:146233-150348+	hsa-miR-3140-5p	1	-0.058	-0.105	143	-15.94
EBV:158625-159918+	hsa-miR-3141	1			143	-25.61
EBV:156527-158751+	hsa-miR-3152-5p	1	-0.191	-0.174	143	-10.99
EBV:146233-150348+	hsa-miR-3166	1		0.03	143	-24.19
EBV:156527-158751+	hsa-miR-3186-5p	1	-0.051	0.067	143	-17.57
EBV:360-951+	hsa-miR-3191-3p	1		-0.018	143	-28.47
EBV:156527-158751+	hsa-miR-3191-3p	1		0.021	143	-21.31
EBV:156527-158751+	hsa-miR-342-5p	1	-0.117	-0.03	143	-19.61
EBV:146233-150348+	hsa-miR-34a-3p	1			143	-12.04
EBV:156527-158751+	hsa-miR-3618	1	-0.087	-0.096	143	-14.06
EBV:156527-158751+	hsa-miR-3668	1	-0.092	-0.119	143	-9.56
EBV:146233-150348+	hsa-miR-367-5p	1			143	-18.31
EBV:146233-150348+	hsa-miR-3912-5p	1			143	-16.14
EBV:360-951+	hsa-miR-3928-3p	1		-0.053	143	-16.8
EBV:158625-159918+	hsa-miR-3939	1		0.03	143	-28.87
EBV:146233-150348+	hsa-miR-4265	1		0.039	143	-21.97
EBV:156527-158751+	hsa-miR-4302	1			143	-22.32
EBV:146233-150348+	hsa-miR-4326	1			143	-23.33
EBV:156527-158751+	hsa-miR-4450	1			143	-24.69
EBV:146233-150348+	hsa-miR-4512	1			143	-20.15
EBV:146233-150348+	hsa-miR-4514	1			143	-21.73
EBV:158625-159918+	hsa-miR-4538	1			143	-23.34
EBV:158625-159918+	hsa-miR-4634	1			143	-27.39
EBV:146233-150348+	hsa-miR-4642	1			143	-36.02
EBV:146233-150348+	hsa-miR-4643	1		0.059	143	-15.65
EBV:146233-150348+	hsa-miR-4645-5p	1			143	-15.92
EBV:156527-158751+	hsa-miR-4656	1	-0.278	-0.2	143	-22.08
EBV:146233-150348+	hsa-miR-4661-5p	1			143	-16.87
EBV:158625-159918+	hsa-miR-4674	1			143	-28.61
EBV:39902-40193-	hsa-miR-4686	1			143	-24.72
EBV:156527-158751+	hsa-miR-4711-3p	1			143	-15.42
EBV:146233-150348+	hsa-miR-4729	1			143	-17.8
EBV:146233-150348+	hsa-miR-4731-3p	1		0.092	143	-23.84
EBV:146233-150348+	hsa-miR-4742-5p	1			143	-14.1
EBV:146233-150348+	hsa-miR-4756-5p	1			143	-21.81
EBV:156527-158751+	hsa-miR-4769-5p	1			143	-22.46
EBV:158625-159918+	hsa-miR-4777-5p	1			143	-21.64
EBV:146233-150348+	hsa-miR-4792	1			143	-26.69
EBV:158625-159918+	hsa-miR-499a-3p	1	-0.031	-0.053	143	-17.25
EBV:158625-159918+	hsa-miR-500a-3p	1	-0.16	-0.118	143	-13.1
EBV:146233-150348+	hsa-miR-504-5p	1		0.056	143	-21.5
EBV:156527-158751+	hsa-miR-505-3p	1		0.05	143	-16.65
EBV:156527-158751+	hsa-miR-5088-3p	1		-0.036	143	-24.19
EBV:158625-159918+	hsa-miR-515-5p	1		-0.014	143	-14.74
EBV:158625-159918+	hsa-miR-516a-3p	1		0.024	143	-21.79
EBV:146233-150348+	hsa-miR-516a-5p	1			143	-19.22
EBV:158625-159918+	hsa-miR-516b-3p	1		0.024	143	-21.79
EBV:146233-150348+	hsa-miR-5189-5p	1			143	-23.95
EBV:156527-158751+	hsa-miR-541-3p	1		0.024	143	-27.27
EBV:156527-158751+	hsa-miR-548u	1			143	-18.3
EBV:146233-150348+	hsa-miR-5581-5p	1	-0.25	-0.239	143	-12.76
EBV:156527-158751+	hsa-miR-5690	1	-0.129	-0.133	143	-15.91
EBV:156527-158751+	hsa-miR-5700	1			143	-11.18
EBV:146233-150348+	hsa-miR-5787	1		0.049	143	-30
EBV:146233-150348+	hsa-miR-579-3p	1			143	-11
EBV:158625-159918+	hsa-miR-589-3p	1			143	-23.5
EBV:156527-158751+	hsa-miR-602	1		-0.008	143	-30.21
EBV:146233-150348+	hsa-miR-605-3p	1		0.071	143	-15.75
EBV:156527-158751+	hsa-miR-605-5p	1			143	-19.17
EBV:146233-150348+	hsa-miR-616-5p	1			143	-17.97
EBV:360-951+	hsa-miR-616-5p	1			143	-17.49
EBV:149581-150348+	hsa-miR-622	1			143	-23.01
EBV:146233-150348+	hsa-miR-627-5p	1		0.019	143	-18.41
EBV:146233-150348+	hsa-miR-6504-5p	1			143	-24.06
EBV:146233-150348+	hsa-miR-6506-5p	1			143	-20.25
EBV:146233-150348+	hsa-miR-6510-5p	1		0.093	143	-27.65
EBV:146233-150348+	hsa-miR-653-3p	1		-0.026	143	-14.56
EBV:158625-159918+	hsa-miR-670-5p	1	-0.264	-0.243	143	-17.61
EBV:156527-158751+	hsa-miR-6719-3p	1	-0.069	-0.125	143	-12.68
EBV:146233-150348+	hsa-miR-6722-3p	1		0.02	143	-28.65
EBV:146233-150348+	hsa-miR-6730-5p	1		0.024	143	-16.9
EBV:146233-150348+	hsa-miR-6732-5p	1		0.113	143	-30.35
EBV:146233-150348+	hsa-miR-6740-5p	1		0.025	143	-18.59
EBV:156527-158751+	hsa-miR-6743-5p	1			143	-26.4
EBV:156527-158751+	hsa-miR-6776-5p	1	-0.099	-0.031	143	-26.63
EBV:39902-40193-	hsa-miR-6778-3p	1		0.05	143	-28.56
EBV:146233-150348+	hsa-miR-6783-3p	1			143	-29.48
EBV:158625-159918+	hsa-miR-6789-3p	1	-0.243	-0.045	143	-23.25
EBV:156527-158751+	hsa-miR-6806-3p	1	-0.062	-0.086	143	-15.09
EBV:360-951+	hsa-miR-6807-5p	1		0.004	143	-25.17
EBV:146233-150348+	hsa-miR-6820-5p	1		0.047	143	-22.07
EBV:156527-158751+	hsa-miR-6822-3p	1		0.034	143	-22.01
EBV:156527-158751+	hsa-miR-6840-3p	1		0.035	143	-21.19
EBV:158625-159918+	hsa-miR-6851-5p	1	-0.009	0.059	143	-23.32
EBV:39902-40193-	hsa-miR-6855-5p	1		0.07	143	-29.95
EBV:158625-159918+	hsa-miR-6859-3p	1		0.06	143	-26.64
EBV:158625-159918+	hsa-miR-6865-3p	1			143	-22.93
EBV:149581-150348+	hsa-miR-6868-3p	1		-0.01	143	-19.37
EBV:146233-150348+	hsa-miR-6868-3p	1		0	143	-19.37
EBV:158625-159918+	hsa-miR-6870-5p	1			143	-26.9
EBV:156527-158751+	hsa-miR-6879-3p	1	-0.061	-0.009	143	-18
EBV:146233-150348+	hsa-miR-6889-3p	1	-0.023	-0.054	143	-14.83
EBV:39902-40193-	hsa-miR-7108-3p	1			143	-31.69
EBV:146233-150348+	hsa-miR-7109-3p	1			143	-26.14
EBV:146233-150348+	hsa-miR-7849-3p	1		-0.017	143	-12.51
EBV:156527-158751+	hsa-miR-7854-3p	1			143	-23.28
EBV:146233-150348+	hsa-miR-937-3p	1	-0.351	-0.149	143	-20.49
EBV:156527-158751+	hsa-let-7c-3p	1		0.019	142	-15.88
EBV:360-951+	hsa-miR-106a-3p	1		-0.011	142	-15.91
EBV:146233-150348+	hsa-miR-1180-3p	1			142	-19.73
EBV:149581-150348+	hsa-miR-1180-3p	1			142	-19.73
EBV:146233-150348+	hsa-miR-1182	1	-0.039	-0.018	142	-20.91
EBV:146233-150348+	hsa-miR-1228-3p	1		0.018	142	-29.66
EBV:158625-159918+	hsa-miR-1250-5p	1		-0.005	142	-22.61
EBV:156527-158751+	hsa-miR-126-5p	1		0.038	142	-9.15
EBV:146233-150348+	hsa-miR-1261	1			142	-13.38
EBV:146233-150348+	hsa-miR-1272	1	-0.028	-0.073	142	-18
EBV:360-951+	hsa-miR-1277-3p	1			142	-9.8
EBV:39902-40193-	hsa-miR-1281	1			142	-31.91
EBV:156527-158751+	hsa-miR-1324	1			142	-24.94
EBV:158625-159918+	hsa-miR-1343-3p	1			142	-30.85
EBV:156527-158751+	hsa-miR-1343-5p	1		0.101	142	-31.51
EBV:156527-158751+	hsa-miR-136-3p	1			142	-13.86
EBV:149581-150348+	hsa-miR-1470	1		0.022	142	-30.44
EBV:146233-150348+	hsa-miR-1470	1		0.023	142	-30.44
EBV:146233-150348+	hsa-miR-147a	1		-0.007	142	-18.1
EBV:360-951+	hsa-miR-148a-3p	1			142	-15.18
EBV:360-951+	hsa-miR-148b-3p	1			142	-15.55
EBV:156527-158751+	hsa-miR-1537-3p	1			142	-14.5
EBV:156527-158751+	hsa-miR-155-3p	1	-0.099	-0.086	142	-17.07
EBV:156527-158751+	hsa-miR-16-2-3p	1			142	-12.39
EBV:146233-150348+	hsa-miR-181b-3p	1		0.015	142	-15.88
EBV:146233-150348+	hsa-miR-1908-5p	1		0.056	142	-29.63
EBV:39902-40193-	hsa-miR-1913	1			142	-37.87
EBV:156527-158751+	hsa-miR-193b-5p	1	-0.107	-0.092	142	-17.87
EBV:158625-159918+	hsa-miR-199b-5p	1	-0.255	-0.209	142	-14.2
EBV:156527-158751+	hsa-miR-199b-5p	1	-0.238	-0.198	142	-14.2
EBV:146233-150348+	hsa-miR-203a-5p	1			142	-22.01
EBV:146233-150348+	hsa-miR-205-5p	1			142	-22.91
EBV:146233-150348+	hsa-miR-208a-5p	1			142	-19.38
EBV:39902-40193-	hsa-miR-21-5p	1			142	-20.02
EBV:158625-159918+	hsa-miR-210-5p	1	-0.034	0.067	142	-14.74
EBV:158625-159918+	hsa-miR-212-5p	1			142	-23.07
EBV:360-951+	hsa-miR-222-5p	1		0.009	142	-19.76
EBV:158625-159918+	hsa-miR-25-5p	1	-0.34	-0.077	142	-23.56
EBV:158625-159918+	hsa-miR-26b-3p	1		0.026	142	-20.92
EBV:156527-158751+	hsa-miR-26b-3p	1		0.027	142	-20.92
EBV:158625-159918+	hsa-miR-298	1			142	-16.92
EBV:146233-150348+	hsa-miR-29a-5p	1			142	-13.79
EBV:158625-159918+	hsa-miR-30b-3p	1	-0.036	-0.004	142	-23.27
EBV:156527-158751+	hsa-miR-3124-3p	1	-0.107	-0.176	142	-14.06
EBV:158625-159918+	hsa-miR-3124-3p	1	-0.094	-0.166	142	-14.06
EBV:156527-158751+	hsa-miR-3139	1		0.027	142	-22.9
EBV:146233-150348+	hsa-miR-3143	1		0.087	142	-20.64
EBV:156527-158751+	hsa-miR-3160-5p	1		-0.007	142	-14.54
EBV:158625-159918+	hsa-miR-3160-5p	1		-0.002	142	-14.54
EBV:146233-150348+	hsa-miR-3163	1			142	-9.51
EBV:158625-159918+	hsa-miR-3177-5p	1		0.039	142	-24.7
EBV:146233-150348+	hsa-miR-3183	1	-0.027	-0.116	142	-14.61
EBV:149581-150348+	hsa-miR-3186-5p	1			142	-21.76
EBV:156527-158751+	hsa-miR-3187-3p	1		0.06	142	-33.24
EBV:146233-150348+	hsa-miR-3190-3p	1	-0.286	-0.297	142	-19.2
EBV:146233-150348+	hsa-miR-3197	1			142	-27.89
EBV:146233-150348+	hsa-miR-33a-5p	1			142	-22.01
EBV:146233-150348+	hsa-miR-33b-3p	1	-0.023	0.023	142	-16.86
EBV:39902-40193-	hsa-miR-342-5p	1			142	-19.93
EBV:146233-150348+	hsa-miR-3619-5p	1			142	-30.27
EBV:146233-150348+	hsa-miR-3659	1			142	-21.12
EBV:158625-159918+	hsa-miR-3663-5p	1		0.047	142	-24.76
EBV:156527-158751+	hsa-miR-3680-5p	1			142	-17.49
EBV:146233-150348+	hsa-miR-3714	1			142	-17.01
EBV:156527-158751+	hsa-miR-378a-3p	1		-0.029	142	-16.81
EBV:146233-150348+	hsa-miR-3911	1	-0.162	-0.147	142	-18.16
EBV:149581-150348+	hsa-miR-3916	1			142	-22.45
EBV:156527-158751+	hsa-miR-3943	1		0.065	142	-29.1
EBV:146233-150348+	hsa-miR-3978	1		0.031	142	-16.6
EBV:156527-158751+	hsa-miR-422a	1		-0.029	142	-15.56
EBV:149581-150348+	hsa-miR-4256	1	-0.158	-0.118	142	-12.59
EBV:146233-150348+	hsa-miR-4262	1	-0.009	-0.133	142	-8.27
EBV:146233-150348+	hsa-miR-4290	1			142	-25.14
EBV:146233-150348+	hsa-miR-4291	1	-0.046	-0.031	142	-13.12
EBV:158625-159918+	hsa-miR-4313	1	-0.247	-0.137	142	-17.36
EBV:39902-40193-	hsa-miR-4313	1	-0.146	-0.012	142	-23.45
EBV:149581-150348+	hsa-miR-4436a	1	-0.184	-0.199	142	-20.49
EBV:156527-158751+	hsa-miR-4436b-3p	1			142	-19.61
EBV:360-951+	hsa-miR-4441	1			142	-18.16
EBV:158625-159918+	hsa-miR-4448	1		0.033	142	-22.76
EBV:156527-158751+	hsa-miR-4491	1			142	-29.12
EBV:158625-159918+	hsa-miR-4498	1			142	-24.43
EBV:158625-159918+	hsa-miR-449c-3p	1		0.055	142	-20.06
EBV:146233-150348+	hsa-miR-450a-1-3p	1		-0.02	142	-14.94
EBV:146233-150348+	hsa-miR-4516	1			142	-25.76
EBV:360-951+	hsa-miR-4517	1			142	-19.48
EBV:156527-158751+	hsa-miR-4532	1		0.074	142	-33.36
EBV:158625-159918+	hsa-miR-455-5p	1			142	-18.87
EBV:156527-158751+	hsa-miR-4638-3p	1	-0.059	-0.063	142	-21.64
EBV:158625-159918+	hsa-miR-4638-3p	1			142	-31.56
EBV:158625-159918+	hsa-miR-4642	1	-0.117	-0.112	142	-14.53
EBV:146233-150348+	hsa-miR-4644	1		0.004	142	-18.3
EBV:146233-150348+	hsa-miR-4659a-5p	1			142	-19.55
EBV:156527-158751+	hsa-miR-4662b	1	-0.027	-0.058	142	-13.66
EBV:158625-159918+	hsa-miR-4664-3p	1			142	-31.08
EBV:146233-150348+	hsa-miR-4668-5p	1	-0.119	-0.294	142	-8.62
EBV:360-951+	hsa-miR-4685-5p	1			142	-20.51
EBV:146233-150348+	hsa-miR-4688	1			142	-22.45
EBV:146233-150348+	hsa-miR-4700-3p	1	-0.001	-0.061	142	-19.54
EBV:149581-150348+	hsa-miR-4706	1		-0.014	142	-23.89
EBV:156527-158751+	hsa-miR-4714-5p	1		0.063	142	-25.67
EBV:158625-159918+	hsa-miR-4715-3p	1		0.04	142	-26.58
EBV:146233-150348+	hsa-miR-4715-5p	1			142	-17.95
EBV:360-951+	hsa-miR-4727-5p	1			142	-22.08
EBV:156527-158751+	hsa-miR-4731-5p	1	-0.024	0.064	142	-24.65
EBV:158625-159918+	hsa-miR-4745-3p	1		0.048	142	-30.59
EBV:146233-150348+	hsa-miR-4745-5p	1		0.041	142	-27.76
EBV:156527-158751+	hsa-miR-4746-5p	1			142	-28.01
EBV:146233-150348+	hsa-miR-4749-3p	1	-0.346	-0.134	142	-16.84
EBV:146233-150348+	hsa-miR-4760-3p	1		0.046	142	-11.18
EBV:156527-158751+	hsa-miR-4787-3p	1		0.066	142	-29.34
EBV:158625-159918+	hsa-miR-4787-5p	1		0.017	142	-29.51
EBV:146233-150348+	hsa-miR-4793-5p	1			142	-25.68
EBV:156527-158751+	hsa-miR-4796-5p	1			142	-21.46
EBV:158625-159918+	hsa-miR-4799-3p	1	-0.053	-0.041	142	-16.24
EBV:146233-150348+	hsa-miR-494-5p	1		0.07	142	-23.89
EBV:146233-150348+	hsa-miR-501-3p	1		0.046	142	-24.51
EBV:156527-158751+	hsa-miR-5189-3p	1		0.017	142	-19.27
EBV:158625-159918+	hsa-miR-5192	1		0.067	142	-23.04
EBV:149581-150348+	hsa-miR-5196-5p	1	-0.128	-0.094	142	-18.77
EBV:146233-150348+	hsa-miR-5196-5p	1	-0.036	-0.035	142	-18.77
EBV:39902-40193-	hsa-miR-532-3p	1	-0.031	0.04	142	-18.63
EBV:156527-158751+	hsa-miR-532-5p	1			142	-18.94
EBV:158625-159918+	hsa-miR-548aj-5p	1	-0.135	-0.241	142	-13.49
EBV:146233-150348+	hsa-miR-548at-3p	1		0.07	142	-16.77
EBV:158625-159918+	hsa-miR-548g-5p	1	-0.135	-0.241	142	-13.49
EBV:158625-159918+	hsa-miR-548x-5p	1	-0.135	-0.241	142	-13.49
EBV:146233-150348+	hsa-miR-5579-5p	1		0.024	142	-12.17
EBV:156527-158751+	hsa-miR-5589-5p	1	-0.052	0.011	142	-26.26
EBV:158625-159918+	hsa-miR-5591-5p	1	-0.263	-0.104	142	-21.23
EBV:156527-158751+	hsa-miR-5704	1		0.057	142	-23.78
EBV:146233-150348+	hsa-miR-6075	1	-0.256	-0.091	142	-18.56
EBV:158625-159918+	hsa-miR-615-5p	1			142	-27.48
EBV:146233-150348+	hsa-miR-629-3p	1		0.048	142	-24.77
EBV:156527-158751+	hsa-miR-6512-3p	1	-0.152	-0.089	142	-18.94
EBV:158625-159918+	hsa-miR-6512-3p	1	-0.15	-0.088	142	-18.94
EBV:146233-150348+	hsa-miR-6726-5p	1		0.016	142	-23.18
EBV:156527-158751+	hsa-miR-6731-3p	1		-0.042	142	-13.59
EBV:149581-150348+	hsa-miR-6739-3p	1	-0.163	-0.327	142	-6.55
EBV:146233-150348+	hsa-miR-6739-3p	1	-0.123	-0.299	142	-6.55
EBV:149581-150348+	hsa-miR-6746-5p	1			142	-24.45
EBV:149581-150348+	hsa-miR-6753-5p	1		-0.016	142	-20.89
EBV:146233-150348+	hsa-miR-6753-5p	1		-0.004	142	-20.89
EBV:156527-158751+	hsa-miR-676-5p	1			142	-19.98
EBV:156527-158751+	hsa-miR-6762-5p	1		0.017	142	-21.66
EBV:146233-150348+	hsa-miR-6767-5p	1		0.033	142	-20.2
EBV:39902-40193-	hsa-miR-6769a-3p	1			142	-34.02
EBV:156527-158751+	hsa-miR-6774-3p	1		0.003	142	-22.67
EBV:146233-150348+	hsa-miR-6784-3p	1	-0.039	-0.021	142	-22.35
EBV:158625-159918+	hsa-miR-6784-3p	1			142	-25.04
EBV:158625-159918+	hsa-miR-6788-5p	1			142	-19.76
EBV:39902-40193-	hsa-miR-6789-3p	1			142	-25.91
EBV:156527-158751+	hsa-miR-6791-3p	1			142	-30.12
EBV:39902-40193-	hsa-miR-6792-3p	1			142	-29.34
EBV:156527-158751+	hsa-miR-6793-3p	1			142	-26.66
EBV:146233-150348+	hsa-miR-6795-3p	1	-0.123	-0.02	142	-19.96
EBV:156527-158751+	hsa-miR-6795-5p	1			142	-26.11
EBV:158625-159918+	hsa-miR-6798-3p	1		0.064	142	-23.28
EBV:149581-150348+	hsa-miR-6799-5p	1			142	-28.62
EBV:146233-150348+	hsa-miR-6810-5p	1		0.02	142	-22.01
EBV:146233-150348+	hsa-miR-6819-3p	1		0.028	142	-20.83
EBV:149581-150348+	hsa-miR-6819-3p	1		0.029	142	-20.83
EBV:146233-150348+	hsa-miR-6825-3p	1		0.015	142	-23.74
EBV:360-951+	hsa-miR-6827-5p	1			142	-22.99
EBV:156527-158751+	hsa-miR-6847-5p	1			142	-18.97
EBV:156527-158751+	hsa-miR-6849-3p	1		0.019	142	-20.89
EBV:39902-40193-	hsa-miR-6870-3p	1	-0.07	-0.033	142	-18.25
EBV:39902-40193-	hsa-miR-6874-5p	1	-0.115	-0.059	142	-17.32
EBV:146233-150348+	hsa-miR-6892-5p	1		0.081	142	-25.05
EBV:146233-150348+	hsa-miR-7-1-3p	1			142	-22.03
EBV:158625-159918+	hsa-miR-7110-5p	1	-0.186	-0.094	142	-21.9
EBV:156527-158751+	hsa-miR-7110-5p	1	-0.163	-0.055	142	-21.11
EBV:156527-158751+	hsa-miR-7111-5p	1	-0.169	-0.072	142	-26.93
EBV:158625-159918+	hsa-miR-7156-3p	1	-0.138	-0.058	142	-14.74
EBV:158625-159918+	hsa-miR-744-5p	1			142	-24.02
EBV:158625-159918+	hsa-miR-7843-5p	1	-0.143	-0.097	142	-15.32
EBV:360-951+	hsa-miR-873-5p	1		-0.057	142	-16.55
EBV:156527-158751+	hsa-miR-890	1			142	-19.99
EBV:156527-158751+	hsa-miR-892b	1			142	-24.74
EBV:146233-150348+	hsa-miR-934	1		0.05	142	-22.33
EBV:146233-150348+	hsa-miR-942-3p	1		0.037	142	-20.03
EBV:149581-150348+	hsa-miR-942-3p	1		0.04	142	-20.03
EBV:146233-150348+	hsa-miR-9500	1	-0.144	-0.176	142	-16.99
EBV:156527-158751+	hsa-miR-99b-3p	1	-0.088	-0.062	142	-14.92
EBV:360-951+	hsa-miR-1199-3p	1	-0.285	-0.051	141	-21.59
EBV:146233-150348+	hsa-miR-1199-3p	1			141	-18.82
EBV:149581-150348+	hsa-miR-1199-3p	1			141	-18.82
EBV:146233-150348+	hsa-miR-1202	1			141	-25.54
EBV:158625-159918+	hsa-miR-1225-3p	1			141	-28.13
EBV:156527-158751+	hsa-miR-1238-3p	1		0.07	141	-23.81
EBV:158625-159918+	hsa-miR-1248	1		-0.011	141	-21.31
EBV:156527-158751+	hsa-miR-1250-5p	1			141	-22.6
EBV:156527-158751+	hsa-miR-125a-3p	1	-0.035	-0.06	141	-15.93
EBV:146233-150348+	hsa-miR-125b-5p	1			141	-22
EBV:39902-40193-	hsa-miR-1260a	1	-0.049	0.044	141	-17.19
EBV:158625-159918+	hsa-miR-1292-3p	1			141	-23.11
EBV:146233-150348+	hsa-miR-1298-5p	1		0.066	141	-16.53
EBV:156527-158751+	hsa-miR-132-3p	1			141	-24.4
EBV:146233-150348+	hsa-miR-133a-3p	1			141	-21.36
EBV:156527-158751+	hsa-miR-133a-5p	1	-0.146	-0.127	141	-19.42
EBV:146233-150348+	hsa-miR-133b	1			141	-21.36
EBV:146233-150348+	hsa-miR-134-3p	1			141	-20.22
EBV:156527-158751+	hsa-miR-138-1-3p	1	-0.008	-0.048	141	-16.84
EBV:158625-159918+	hsa-miR-1470	1			141	-30.44
EBV:156527-158751+	hsa-miR-148b-3p	1	-0.006	0.027	141	-14.62
EBV:360-951+	hsa-miR-1537-3p	1			141	-20.93
EBV:146233-150348+	hsa-miR-154-5p	1		0.093	141	-16.38
EBV:146233-150348+	hsa-miR-185-3p	1		0.072	141	-22.39
EBV:146233-150348+	hsa-miR-1908-3p	1			141	-25.42
EBV:146233-150348+	hsa-miR-1910-3p	1		0.035	141	-16.45
EBV:156527-158751+	hsa-miR-192-5p	1	-0.029	0.016	141	-24.16
EBV:146233-150348+	hsa-miR-208b-5p	1			141	-13.67
EBV:146233-150348+	hsa-miR-20b-5p	1			141	-21.74
EBV:156527-158751+	hsa-miR-215-5p	1	-0.029	0.016	141	-22.21
EBV:146233-150348+	hsa-miR-2276-5p	1		0.034	141	-20.36
EBV:158625-159918+	hsa-miR-2278	1		0.016	141	-25.52
EBV:146233-150348+	hsa-miR-2355-3p	1		0.026	141	-16.72
EBV:149581-150348+	hsa-miR-298	1			141	-26.07
EBV:158625-159918+	hsa-miR-301a-5p	1	-0.034	-0.017	141	-15.24
EBV:146233-150348+	hsa-miR-302d-5p	1			141	-22.14
EBV:149581-150348+	hsa-miR-302d-5p	1			141	-22.14
EBV:146233-150348+	hsa-miR-3120-5p	1		0.001	141	-15.71
EBV:360-951+	hsa-miR-3131	1		-0.033	141	-19.4
EBV:156527-158751+	hsa-miR-3132	1			141	-24.69
EBV:146233-150348+	hsa-miR-3151-3p	1			141	-18.75
EBV:39902-40193-	hsa-miR-3176	1		0.026	141	-24.31
EBV:156527-158751+	hsa-miR-3183	1			141	-27.97
EBV:158625-159918+	hsa-miR-3186-5p	1	-0.118	0.061	141	-21.9
EBV:156527-158751+	hsa-miR-3188	1			141	-29.31
[truncated: 409 more rows]
