# Supplementary material for: Profiling and functional analysis of exosomal circRNAs from EBV-associated gastric carcinoma CSCs
Source: Research Square preprint supplement (doi:10.21203/rs.3.rs-6704451/v1), 2025-06-12
Supplement: Supplementary file 6 [file afe84b5be8619120ed4b245c.xlsx]

## Sheet: Sheet1
miRNA binded circRNA summary of binding sites between miRNA and target. Total: the number of binding sites. context+ score & context score: The context+ score & context score from TargetScan. Structure Score & Free Energy: The thermodynamic properties of the binding site from miRanda.
circRNA	miRNA	Total	Structure	Energy
chr3:157839892-157841780+	ebv-miR-BART7-5p	2	295	-39.47
chr3:71090479-71102924-	ebv-miR-BART12	1	164	-22.35
chr3:71064700-71102924-	ebv-miR-BART12	1	164	-22.35
chr11:33307959-33309057+	ebv-miR-BART22	1	164	-13.89
chr5:142779221-142780417-	ebv-miR-BHRF1-3	1	160	-18.81
chr11:33307959-33309057+	ebv-miR-BART1-5p	1	157	-17.28
chrX:79962926-79975155-	ebv-miR-BART15	1	157	-20.51
chr11:33307959-33309057+	ebv-miR-BART12	1	156	-23.92
chr3:149563798-149639014+	ebv-miR-BART5-5p	1	156	-26.64
chr18:56363598-56367823+	ebv-miR-BART8-5p	1	156	-23.75
chr18:46889531-46906128-	ebv-miR-BHRF1-2-3p	1	155	-17.48
chr3:149563798-149639014+	ebv-miR-BHRF1-2-5p	1	154	-13.47
chr8:48308936-48320523+	ebv-miR-BART10-5p	1	153	-21.56
chr5:124036707-124036962-	ebv-miR-BART18-5p	1	153	-23
chr10:7839010-7844817+	ebv-miR-BART3-3p	1	153	-21.41
chr18:56363598-56367823+	ebv-miR-BHRF1-2-3p	1	153	-16
chr2:37543380-37544322-	ebv-miR-BART22	1	152	-11.86
chr10:7839010-7844817+	ebv-miR-BART21-5p	1	151	-18.14
chr18:56363598-56367823+	ebv-miR-BART5-5p	1	151	-10.81
chr2:32142995-32157204-	ebv-miR-BHRF1-2-3p	1	151	-11.38
chrX:79962926-79975155-	ebv-miR-BART14-5p	1	150	-18.36
chr11:33307959-33309057+	ebv-miR-BHRF1-2-5p	1	150	-9.21
chr10:7318854-7327916-	ebv-miR-BART7-3p	1	149	-20.91
chr10:7839010-7844817+	ebv-miR-BART17-3p	1	148	-17.83
chr2:37543380-37544322-	ebv-miR-BHRF1-2-3p	1	147	-10.2
chr5:76758920-76760634-	ebv-miR-BHRF1-2-3p	1	147	-10.62
chrX:79962926-79975155-	ebv-miR-BHRF1-2-3p	1	147	-17.68
chr5:142779221-142780417-	ebv-miR-BART17-5p	1	146	-17.3
chr18:56363598-56367823+	ebv-miR-BART21-3p	1	146	-30.62
chr2:37543380-37544322-	ebv-miR-BART5-5p	1	146	-19.61
chr11:33307959-33309057+	ebv-miR-BART11-5p	1	145	-20.5
chr2:37543380-37544322-	ebv-miR-BART4-3p	1	145	-14.76
chr11:33307959-33309057+	ebv-miR-BART5-3p	1	145	-20.69
chr5:142779221-142780417-	ebv-miR-BART18-5p	1	144	-12.1
chr5:167915607-167921655+	ebv-miR-BART2-5p	1	144	-8.38
chr10:7318854-7327916-	ebv-miR-BART6-5p	1	144	-18.56
chrX:79962926-79975155-	ebv-miR-BART1-3p	1	143	-14.25
chr10:7318854-7327916-	ebv-miR-BART17-5p	1	143	-14.35
chr3:149563798-149639014+	ebv-miR-BART2-5p	1	143	-8.35
chr10:7839010-7844817+	ebv-miR-BART20-5p	1	143	-23.54
chr8:48308936-48320523+	ebv-miR-BART12	1	142	-20.65
chr5:142779221-142780417-	ebv-miR-BART19-3p	1	142	-17.39
chr11:33307959-33309057+	ebv-miR-BART19-3p	1	142	-6.52
chr18:46889531-46906128-	ebv-miR-BART9-3p	1	142	-9.69
chr10:7839010-7844817+	ebv-miR-BART1-3p	1	141	-18.95
chr3:71064700-71102924-	ebv-miR-BART11-3p	1	141	-22.14
chr2:37543380-37544322-	ebv-miR-BART11-5p	1	141	-18.29
chr2:37543380-37544322-	ebv-miR-BART20-5p	1	141	-18.98
chr5:167915607-167921655+	ebv-miR-BART22	1	141	-13.67
chr11:33307959-33309057+	ebv-miR-BART15	1	140	-16.93
chr3:71090479-71102924-	ebv-miR-BART17-5p	1	140	-17.2
chr3:71064700-71102924-	ebv-miR-BART17-5p	1	140	-17.2
chr10:7839010-7844817+	ebv-miR-BART19-3p	1	140	-15.32
chr5:142779221-142780417-	ebv-miR-BART2-5p	1	140	-12.46
chr2:37543380-37544322-	ebv-miR-BART21-3p	1	140	-7.86
chr11:33307959-33309057+	ebv-miR-BART21-3p	1	140	-12.15
